# Supplementary material for: Cardiovascular outcomes and fracture risk after the discontinuation of preventative medications in older patients with complex health needs: a self-controlled case series analysis
Source: bioRxiv or medRxiv preprint supplement (doi:10.1101/2024.03.08.24303980), 2024-03-15
Supplement: Supplementary file [file media-1.pdf]

## **Supplementary Material 1**

Cardiovascular outcomes and fracture risk after the discontinuation of preventative medications in older patients with complex health needs: a self-controlled case series analysis

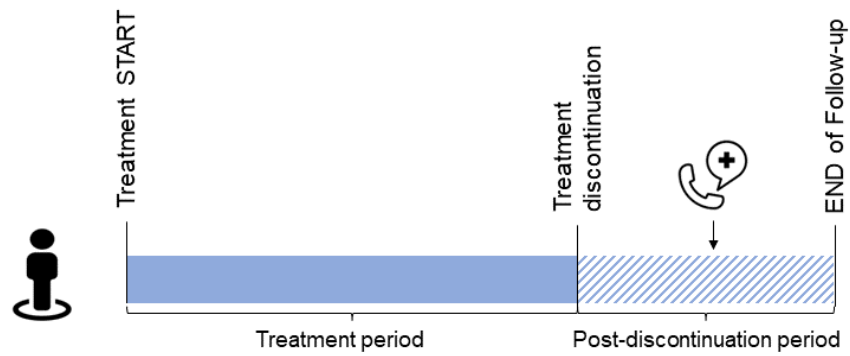

**Figure S1: Self-controlled case series design** Within each patient's follow-up, event rates during exposed (*treatment period*) and unexposed (*post-discontinuation*) time windows are compared.

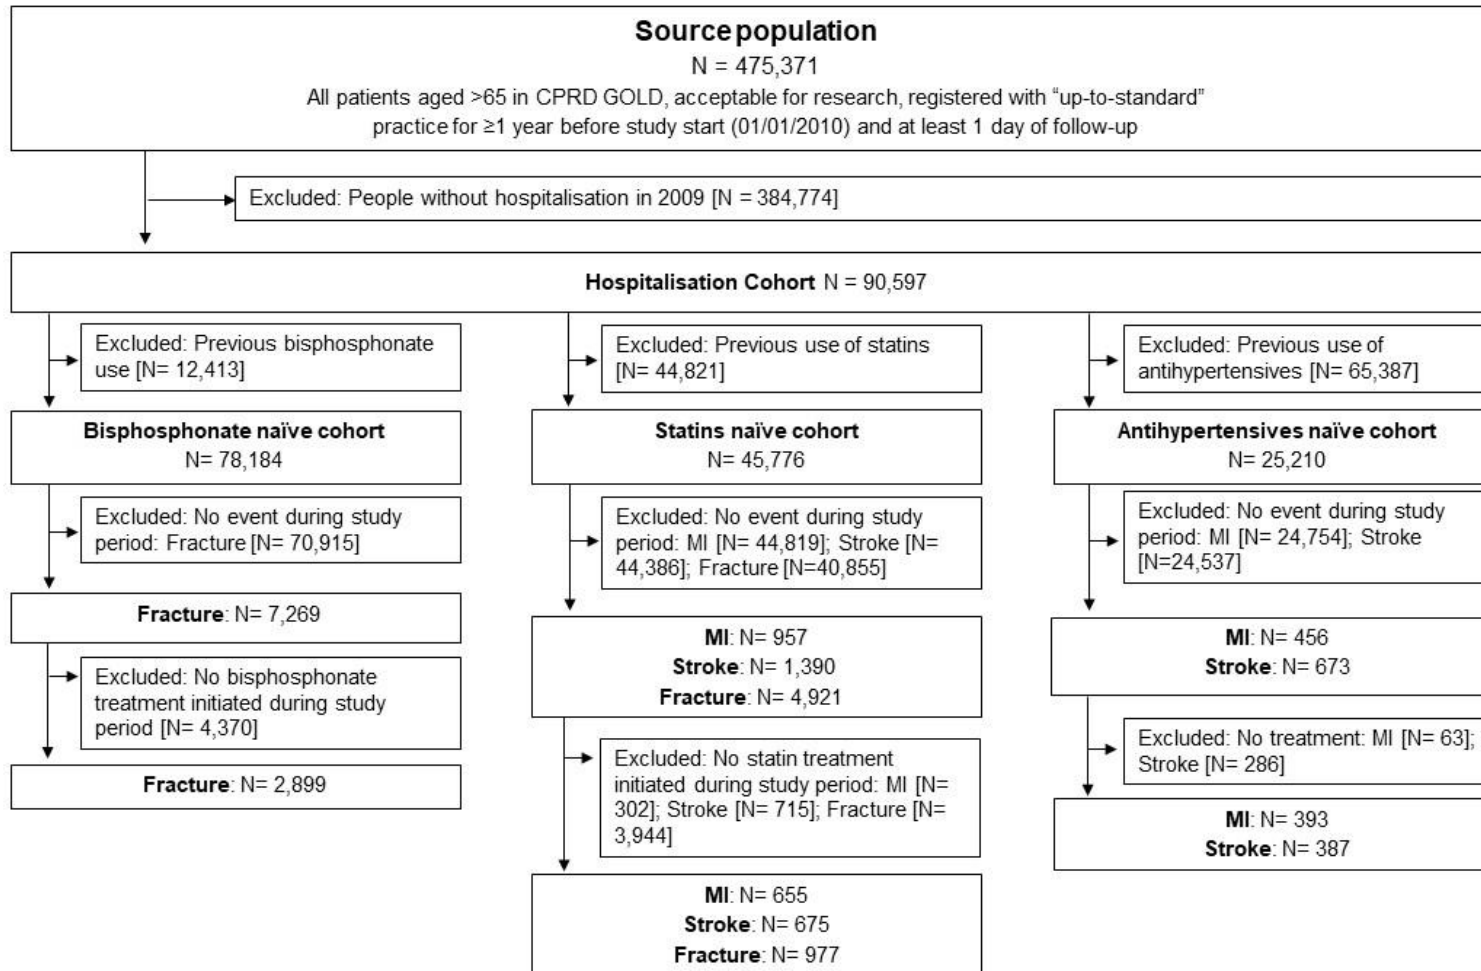

Figure S2: Study inclusion flowchart for the hospitalisation cohort

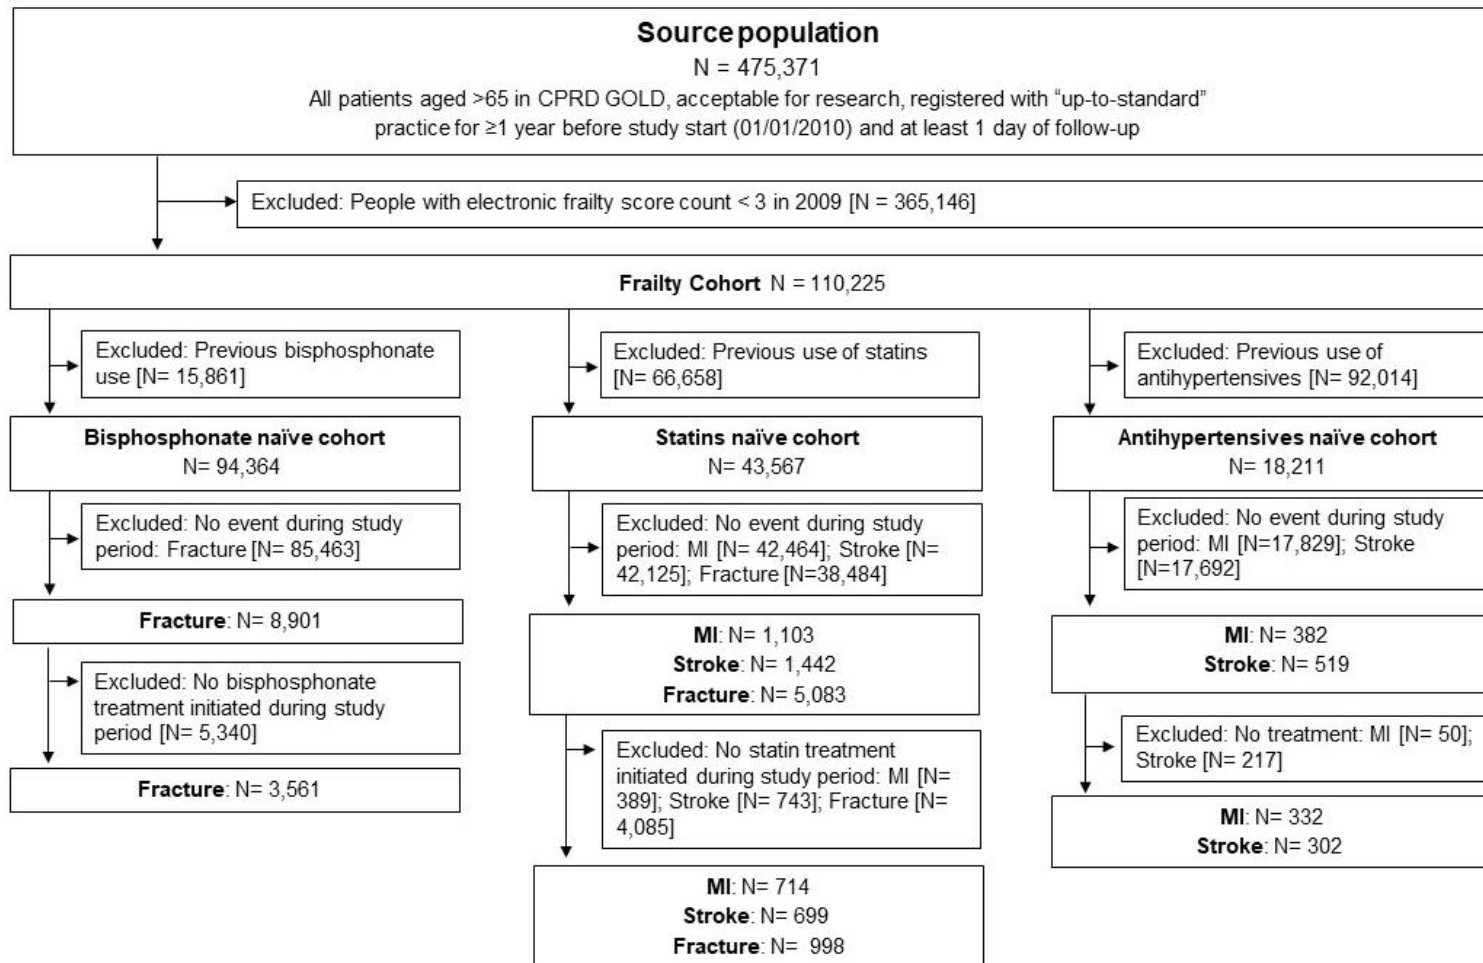

Figure S3: Study inclusion flowchart for the frailty cohort

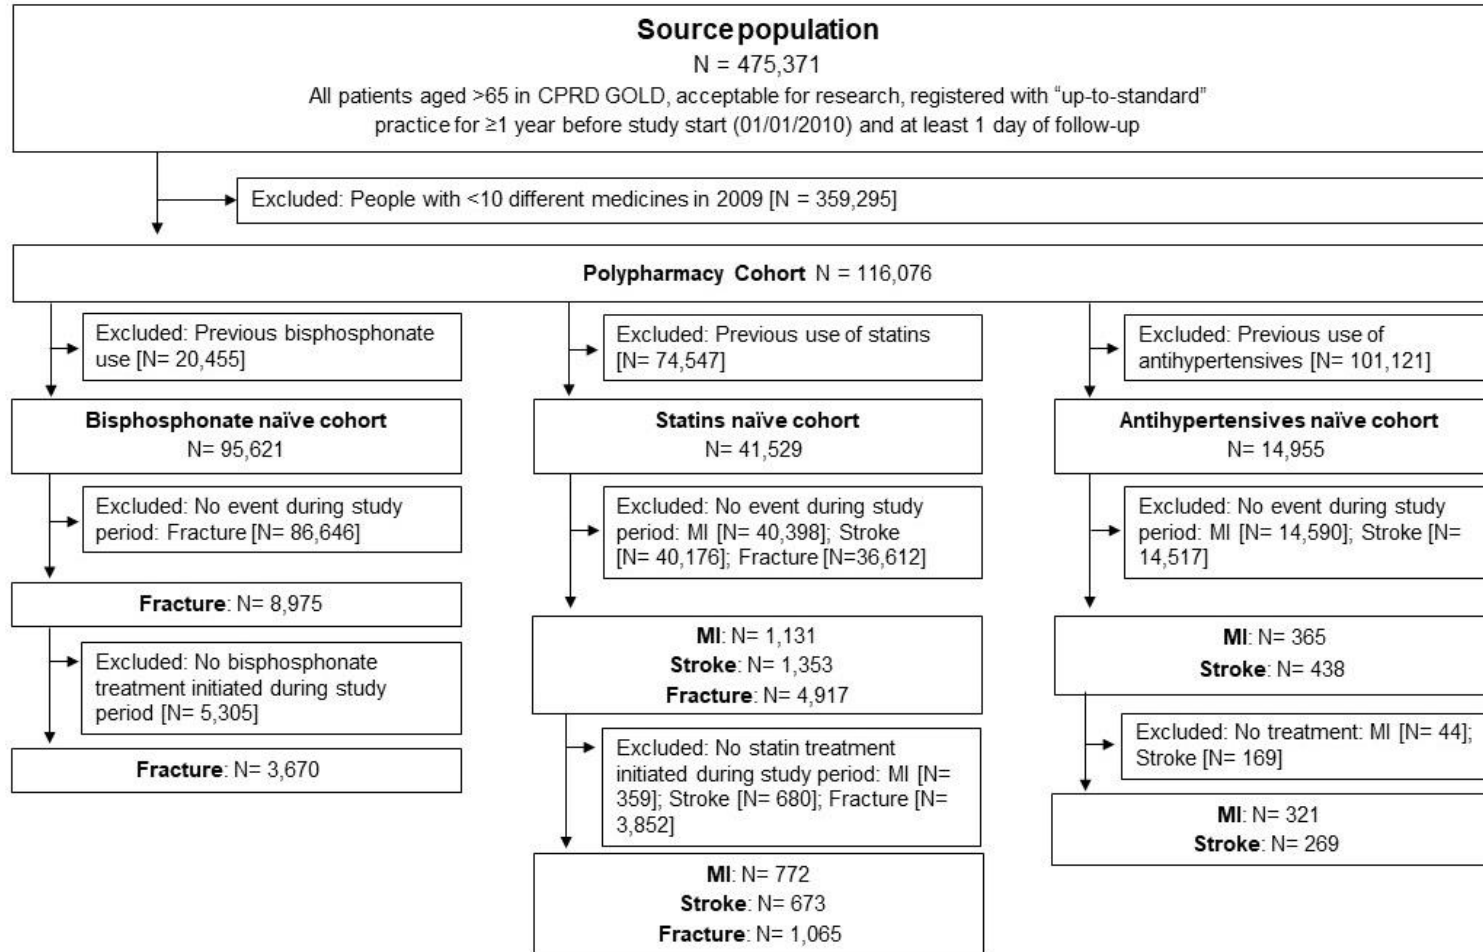

Figure S4: Study inclusion flowchart for the polypharmacy cohort

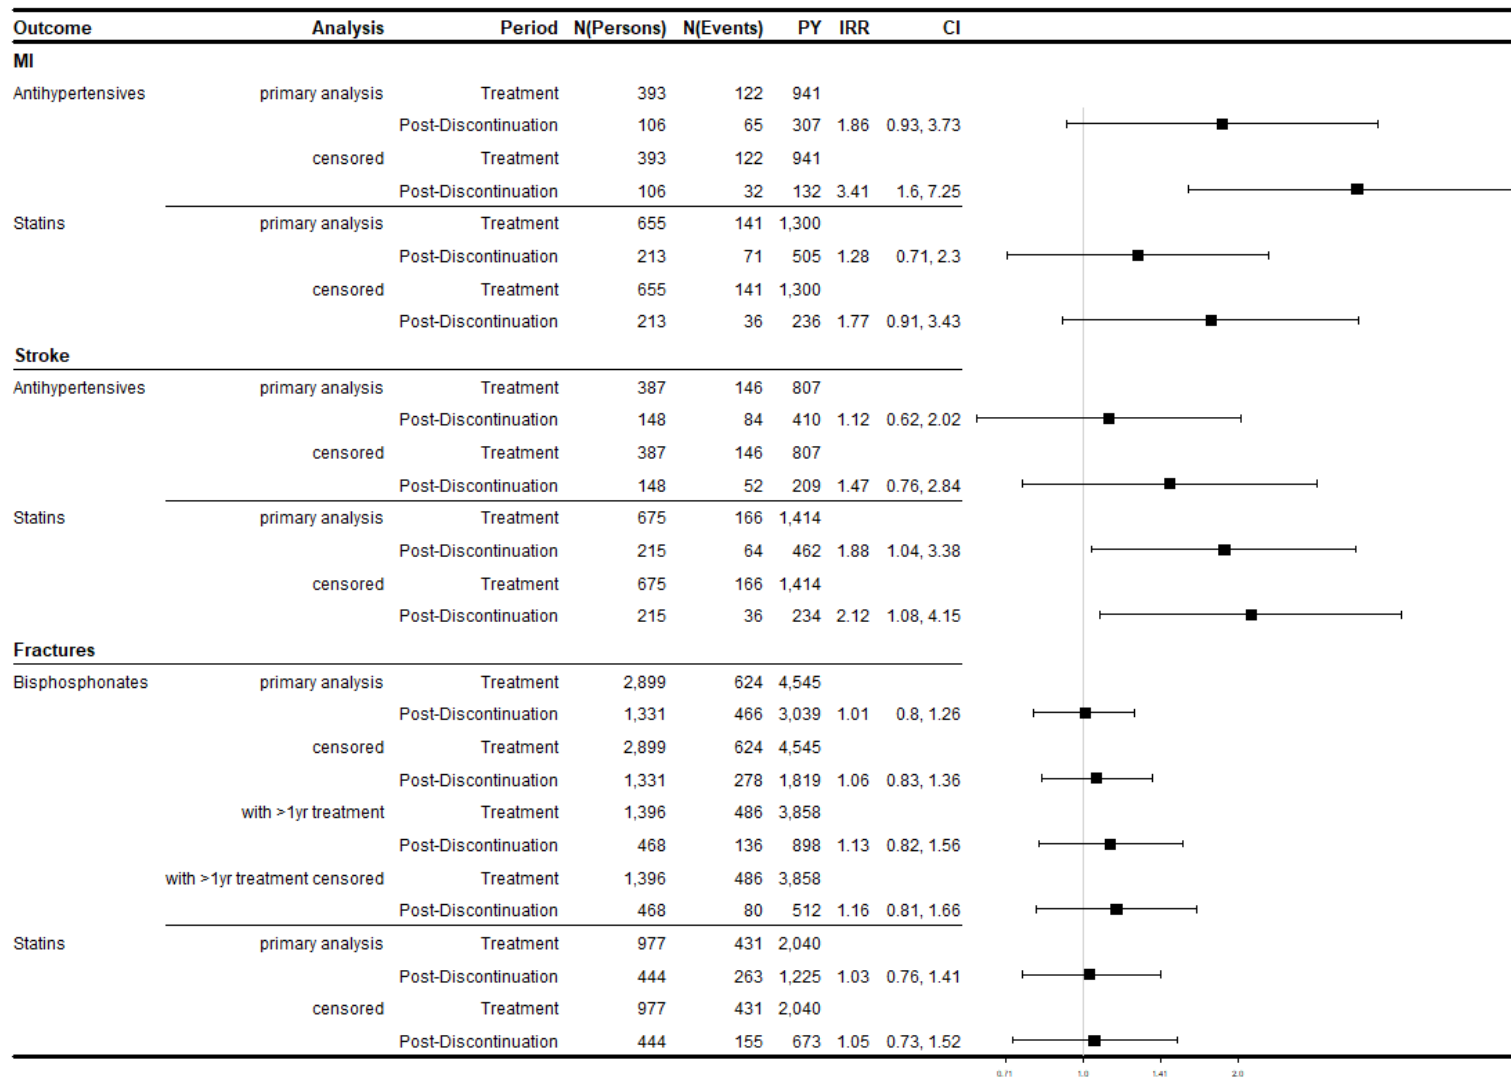

**Figure S5: Self-controlled case series** in the hospitalisation cohort.

N(Persons) = Number of persons, N(Events) = Number of events, PY = patient years, IRR = Incidence rate ratio, CI = 95% confidence intervals

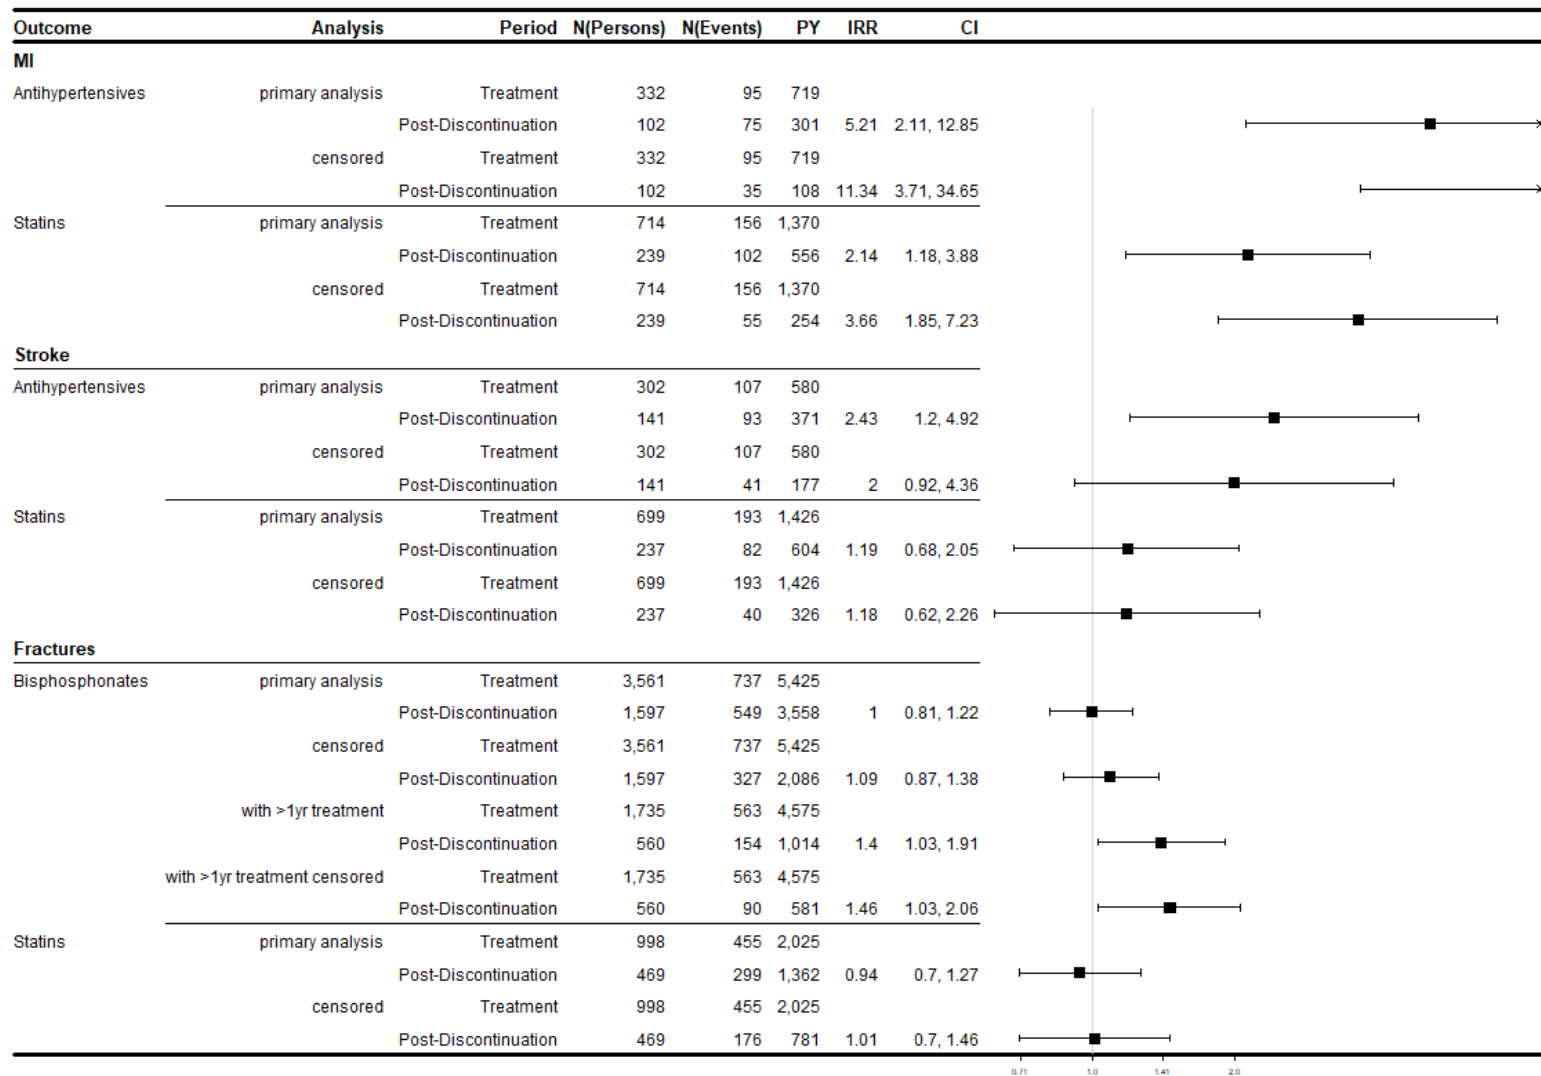

**Figure S6: Self-controlled case series** in the frailty cohort.

N(Persons) = Number of persons, N(Events) = Number of events, PY = patient years, IRR = Incidence rate ratio, CI = 95% confidence intervals

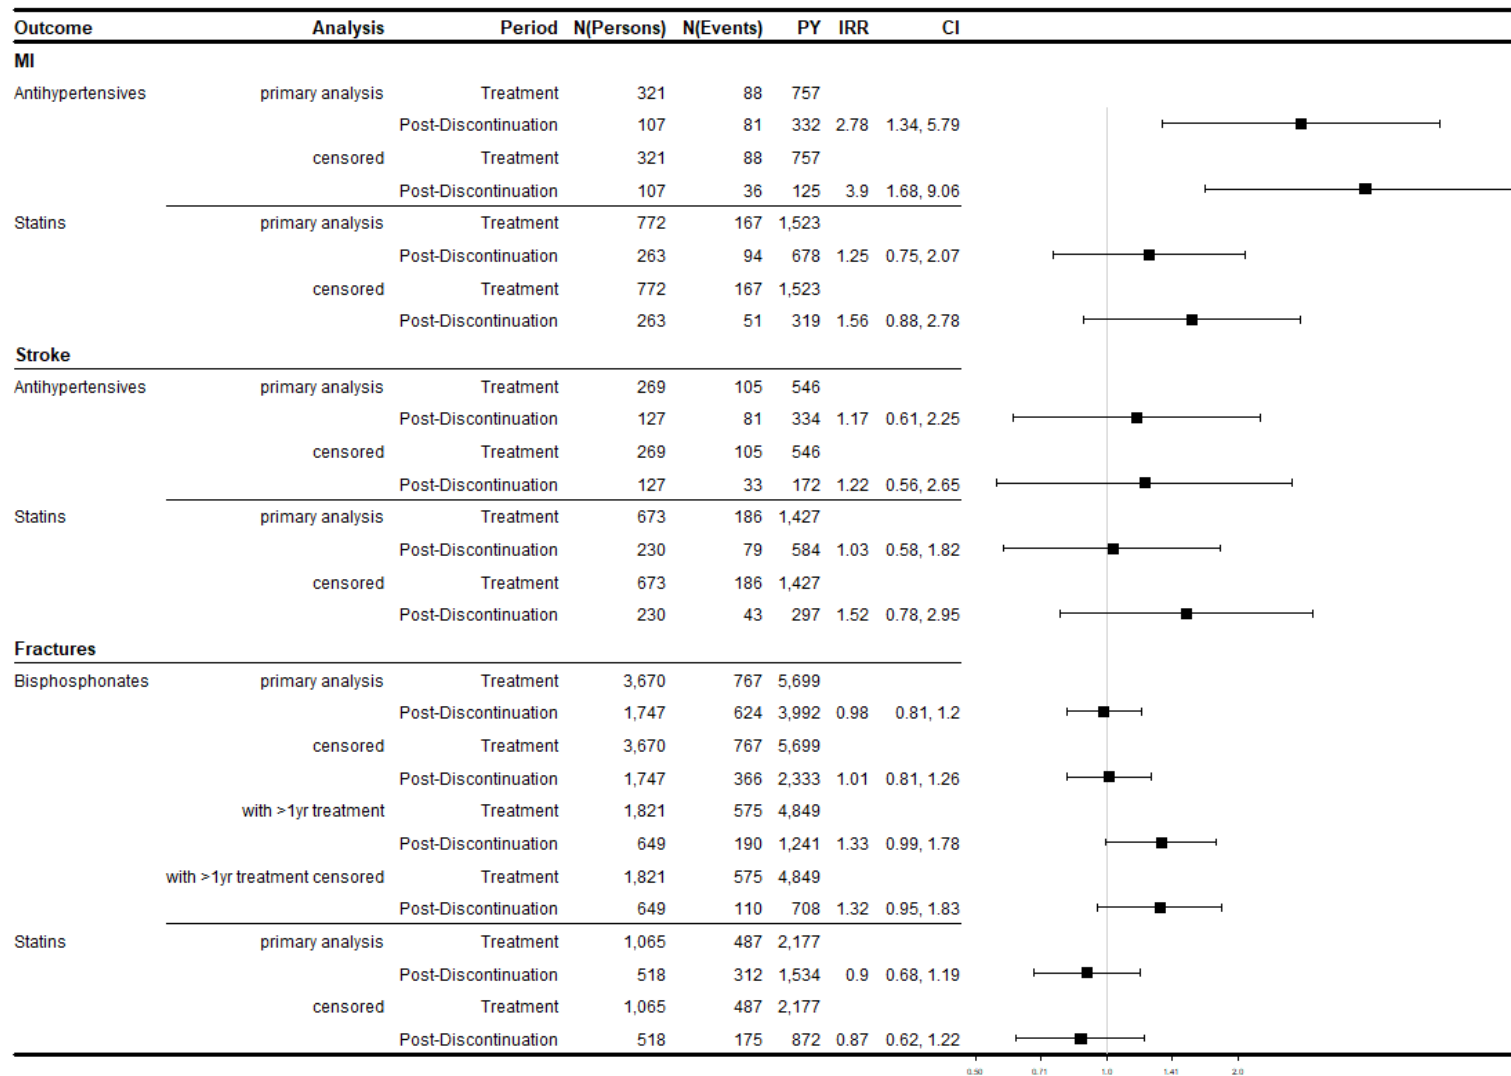

**Figure S7: Self-controlled case series** in the polypharmacy cohort.

N(Persons) = Number of persons, N(Events) = Number of events, PY = patient years, IRR = Incidence rate ratio, CI = 95% confidence intervals



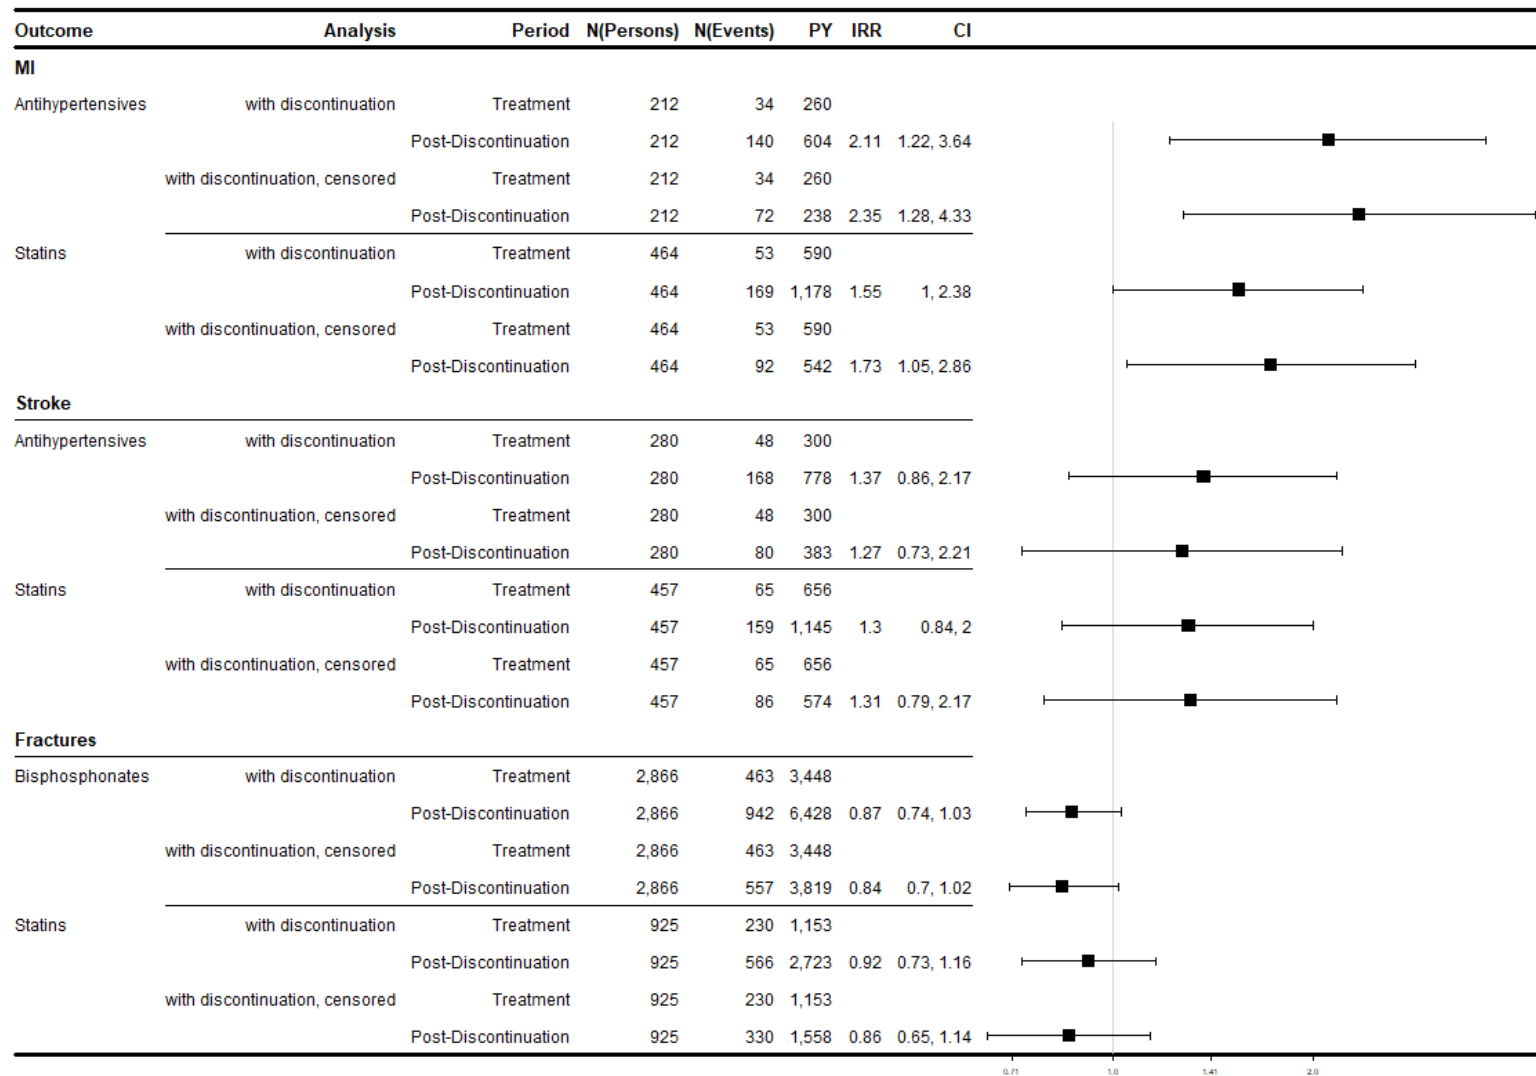

**Figure S8: Self-controlled case series** in the complex health needs cohort (CHN).  
N(Persons) = Number of persons, N(Events) = Number of events, PY = patient years, IRR = Incidence rate ratio, CI = 95% confidence intervals

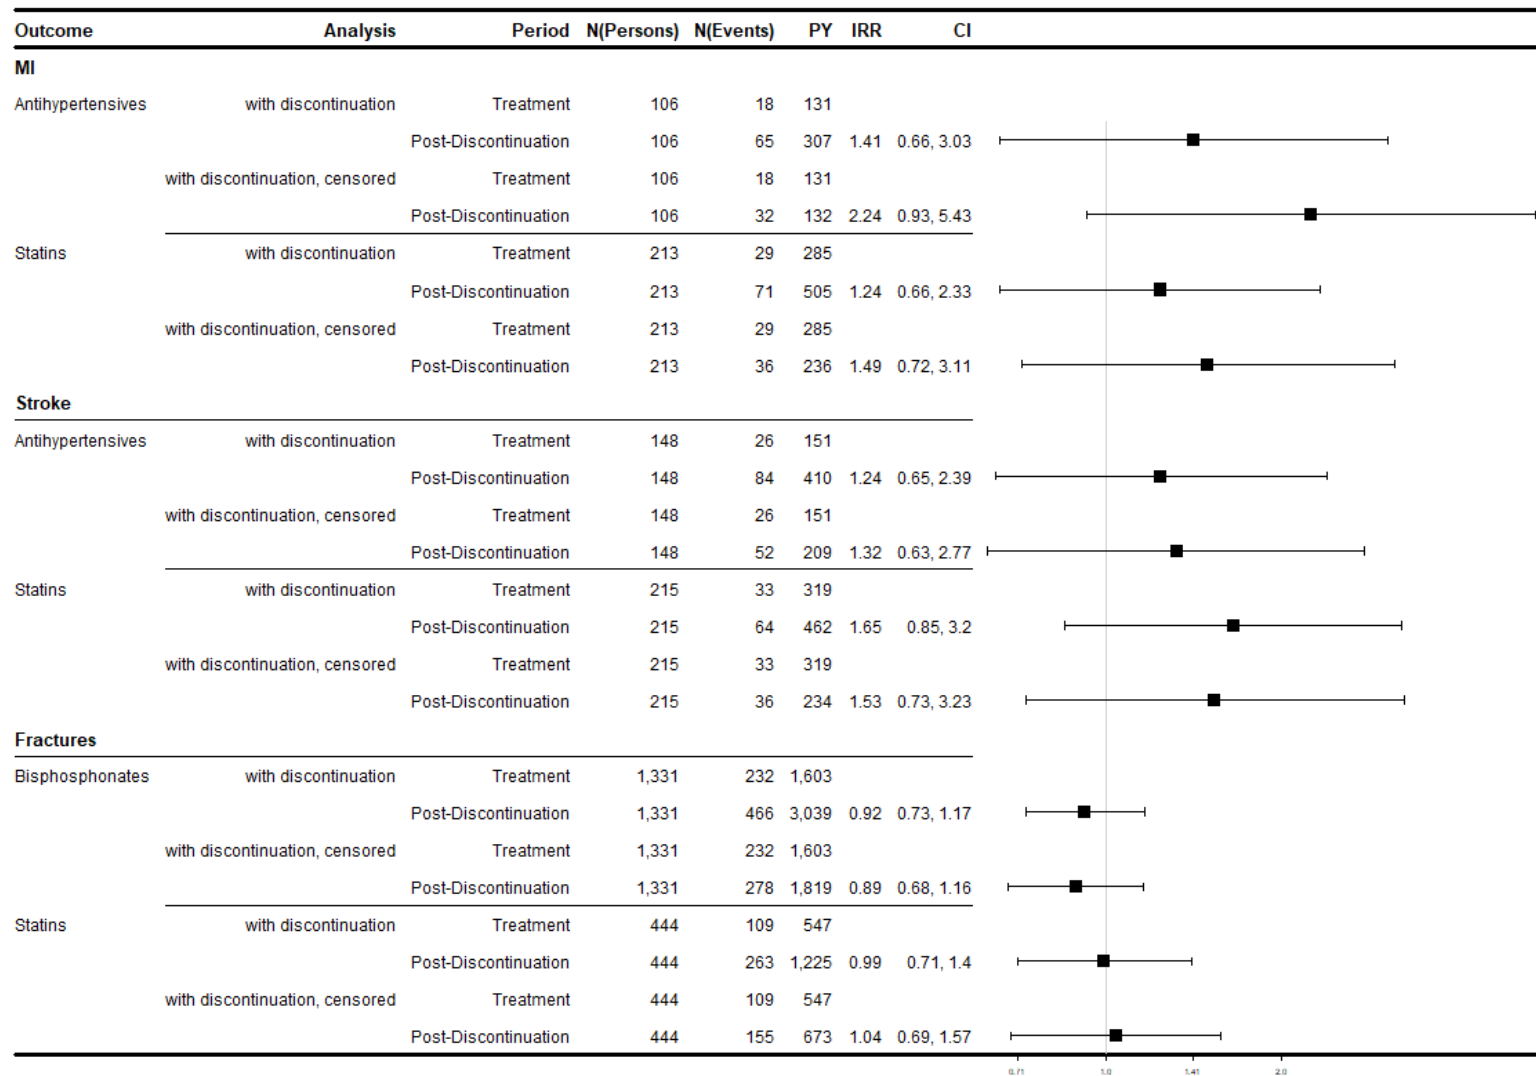

**Figure S9: Self-controlled case series** in the hospitalisation cohort.

N(Persons) = Number of persons, N(Events) = Number of events, PY = patient years, IRR = Incidence rate ratio, CI = 95% confidence intervals

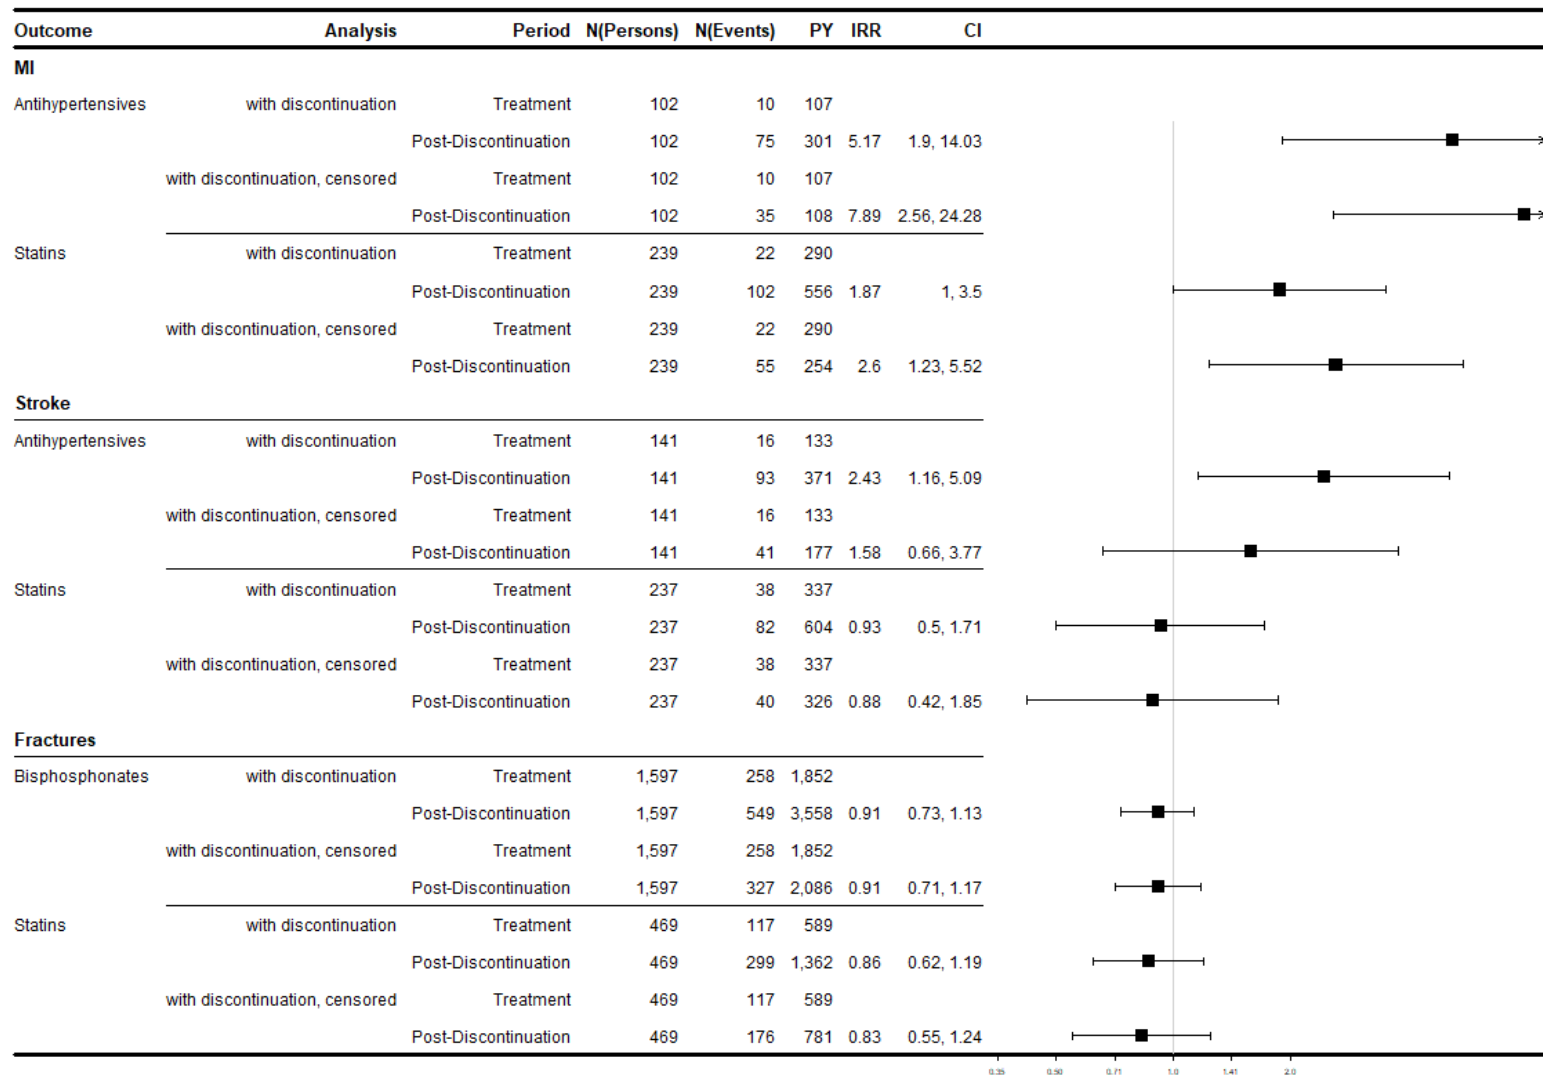

**Figure S10: Self-controlled case series** in the frailty cohort.

N(Persons) = Number of persons, N(Events) = Number of events, PY = patient years, IRR = Incidence rate ratio, CI = 95% confidence intervals

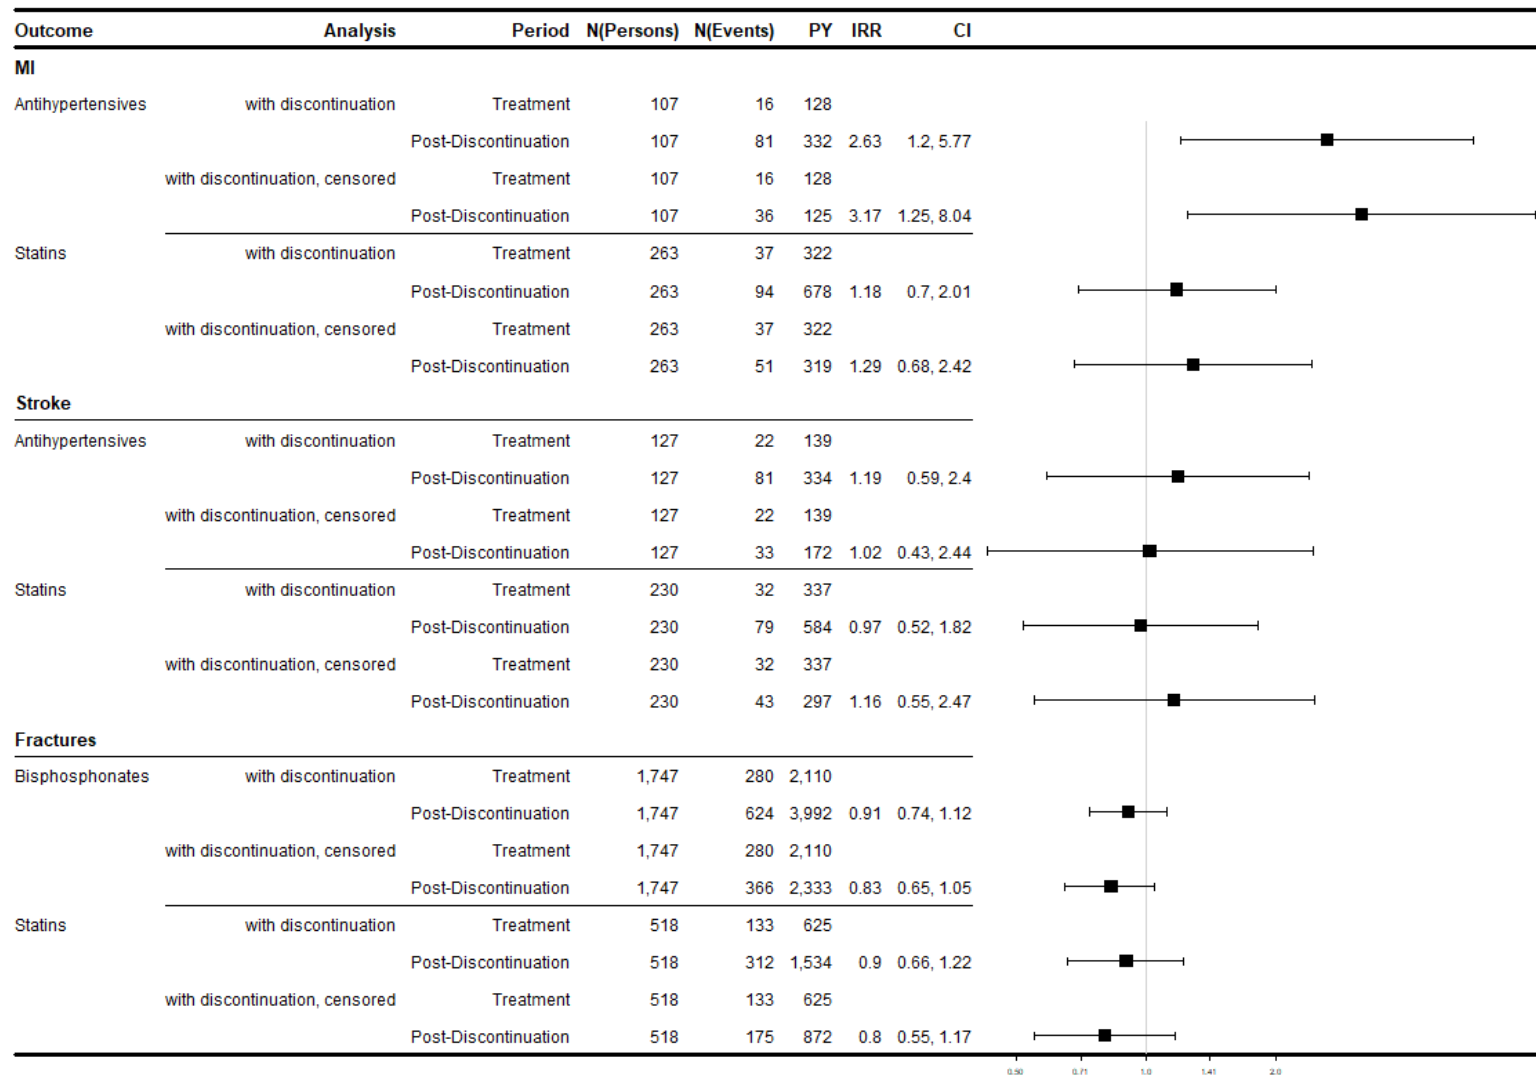

**Figure S11: Self-controlled case series** in the polypharmacy cohort.

N(Persons) = Number of persons, N(Events) = Number of events, PY = patient years, IRR = Incidence rate ratio, CI = 95% confidence intervals

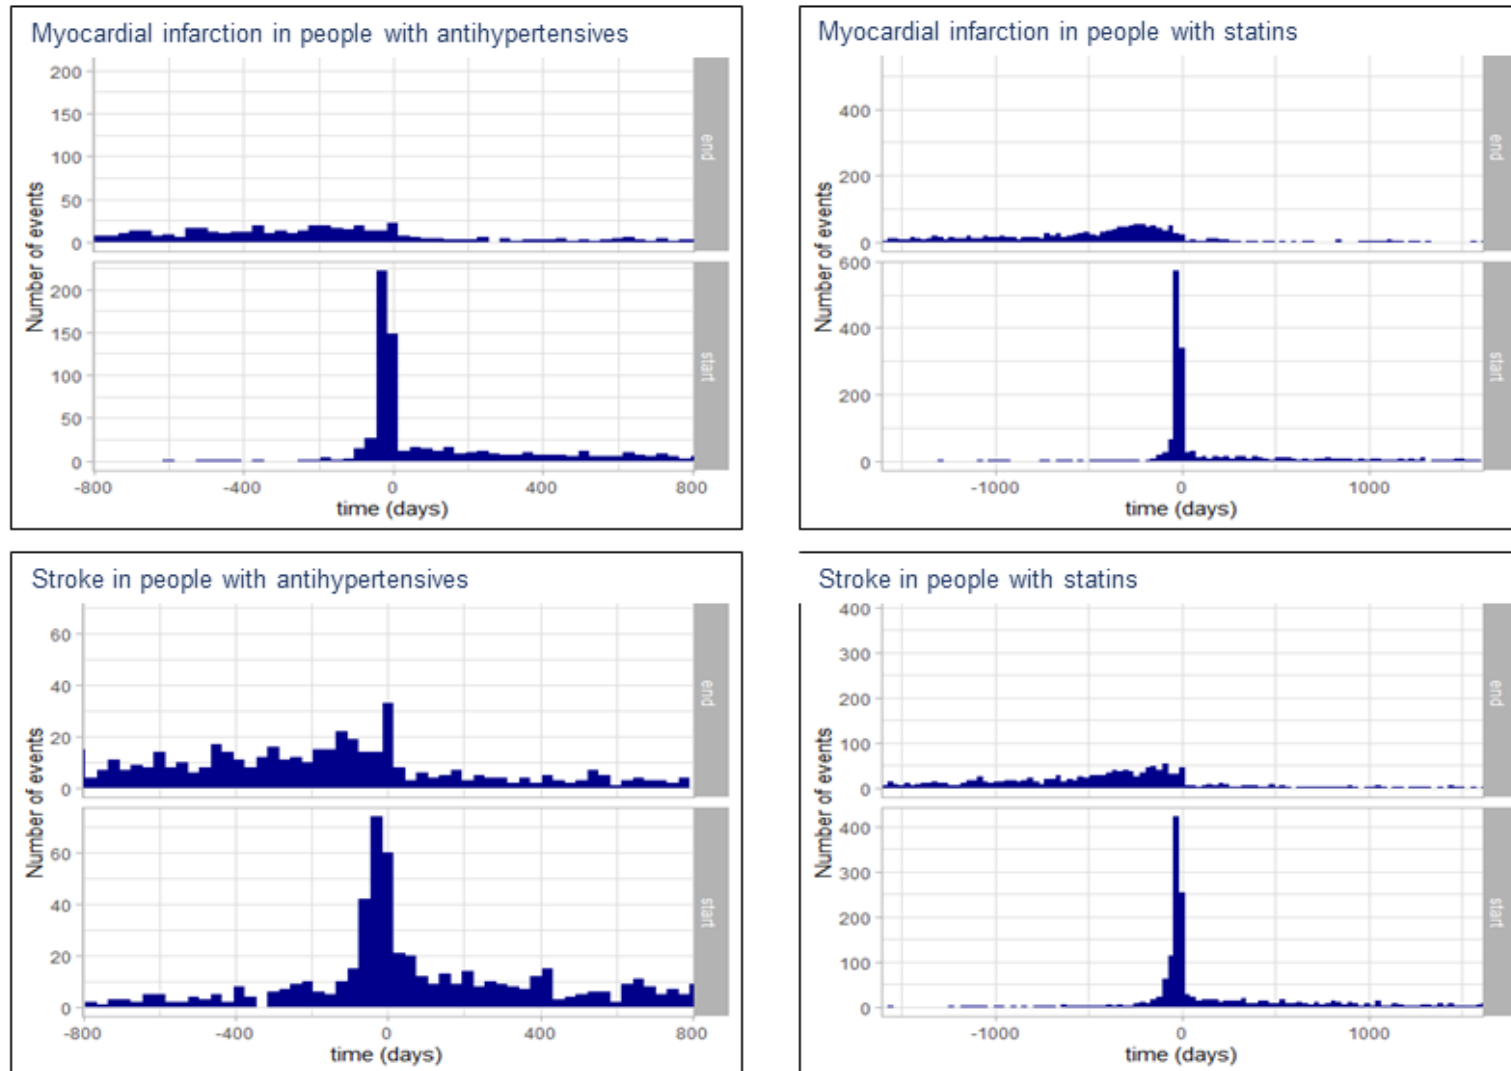

Figure S12: Assumption testing for cardiovascular events in CHN cohort. Distribution of number of events relative to treatment end and start for antihypertensives and statins.

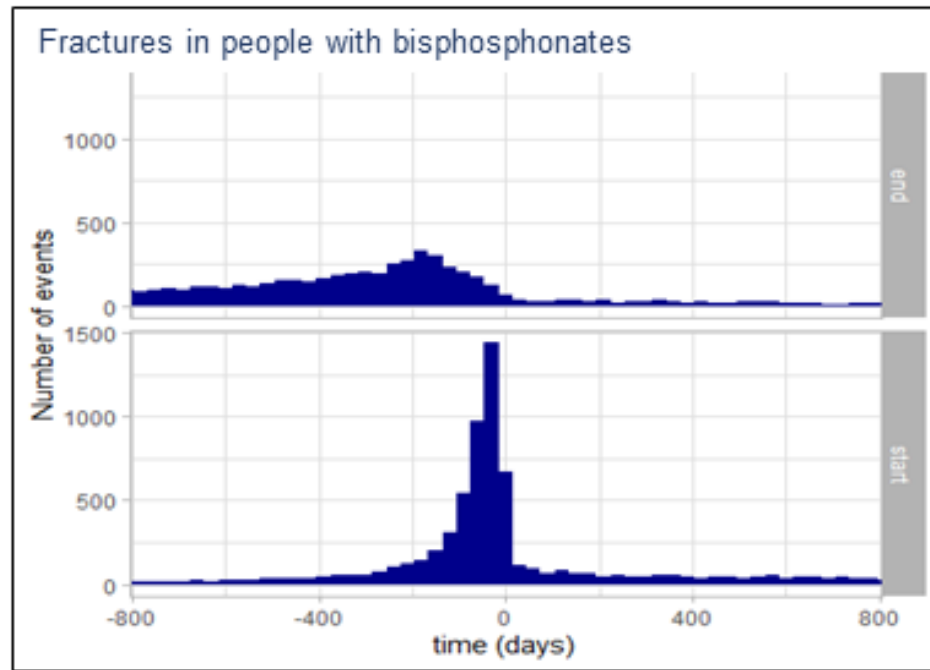

**Figure S13: Assumption testing for fractures** in CHN cohort. Distribution of number of events relative to treatment end and start of bisphosphonates.

**Table S1: Follow-up duration in year for people with and without events** in CHN cohort without previous use of respective preventative medication

|                                       | 1 <sup>st</sup> Qu. [years] | Median [years] | 3 <sup>rd</sup> Qu. [years] |
|---------------------------------------|-----------------------------|----------------|-----------------------------|
| <b>Antihypertensives-naïve people</b> |                             |                |                             |
| with MI                               | 3.20                        | 5.24           | 6.91                        |
| without MI                            | 1.81                        | 4.21           | 5.93                        |
| with stroke                           | 2.77                        | 4.78           | 6.65                        |
| without stroke                        | 1.80                        | 4.21           | 5.93                        |
| <b>Bisphosphonate-naïve people</b>    |                             |                |                             |
| with fractures                        | 3.44                        | 5.23           | 6.74                        |
| without fractures                     | 1.76                        | 3.99           | 5.83                        |
| <b>Statin-naïve people</b>            |                             |                |                             |
| with MI                               | 2.83                        | 4.57           | 6.28                        |
| without MI                            | 1.68                        | 3.81           | 5.78                        |
| with stroke                           | 2.66                        | 4.54           | 6.28                        |
| without stroke                        | 1.68                        | 3.81           | 5.77                        |

**Table S2: Number of events per person** in CHN cohort without previous use of respective preventative medication.

|                                   | Number of events per person |       |     |    |    |   |
|-----------------------------------|-----------------------------|-------|-----|----|----|---|
|                                   | 1                           | 2     | 3   | 4  | 5  | 6 |
| <b>Myocardial infarction</b>      |                             |       |     |    |    |   |
| In antihypertensives-naïve people | 841                         | 51    | <5  | <5 |    |   |
| In statin-naïve people            | 2,021                       | 152   | 17  |    |    |   |
| <b>Fractures</b>                  |                             |       |     |    |    |   |
| In bisphosphonate-naïve people    | 15,478                      | 2,565 | 448 | 88 | 22 | 5 |
| <b>Stroke</b>                     |                             |       |     |    |    |   |
| In antihypertensives-naïve people | 1,123                       | 104   | 9   | <5 |    |   |
| In statin-naïve people            | 2,696                       | 247   | 18  | <5 |    |   |
