# Supplementary material for: Cardiovascular outcomes and fracture risk after the discontinuation of preventative medications in older patients with complex health needs: a self-controlled case series analysis
Source: bioRxiv or medRxiv preprint supplement (doi:10.1101/2024.03.08.24303980), 2024-03-15
Supplement: Supplementary file [file media-2.pdf]

## **Supplementary Material 2**

Cardiovascular outcomes and fracture risk after the discontinuation of preventative medications in older patients with complex health needs:  
a self-controlled case series analysis

## Code lists: Stroke

| readcode           | readterm                                                      |
|--------------------|---------------------------------------------------------------|
| G61z.00            | Intracerebral haemorrhage NOS                                 |
| G61..00            | Intracerebral haemorrhage                                     |
| G61..11            | CVA - cerebrovascular accid due to intracerebral haemorrhage  |
| G613.00            | Cerebellar haemorrhage                                        |
| G61..12            | Stroke due to intracerebral haemorrhage                       |
| G61X100            | Right sided intracerebral haemorrhage, unspecified            |
| G602.00            | Subarachnoid haemorrhage from middle cerebral artery          |
| G61X000            | Left sided intracerebral haemorrhage, unspecified             |
| G617.00            | Intracerebral haemorrhage, intraventricular                   |
| G61X.00            | Intracerebral haemorrhage in hemisphere, unspecified          |
| Gyu6200            | [X]Other intracerebral haemorrhage                            |
| G618.00            | Intracerebral haemorrhage, multiple localized                 |
| Gyu6F00            | [X]Intracerebral haemorrhage in hemisphere, unspecified       |
| G619.00            | Lobar cerebral haemorrhage                                    |
| G64..12            | Infarction - cerebral                                         |
| G64z.00            | Cerebral infarction NOS                                       |
| G64z.12            | Cerebellar infarction                                         |
| G64..13            | Stroke due to cerebral arterial occlusion                     |
| G64z200            | Left sided cerebral infarction                                |
| G64z300            | Right sided cerebral infarction                               |
| G671z00            | Generalised ischaemic cerebrovascular disease NOS             |
| G64z.11            | Brainstem infarction NOS                                      |
| G63y100            | Cerebral infarction due to embolism of precerebral arteries   |
| G64z000            | Brainstem infarction                                          |
| G64z400            | Infarction of basal ganglia                                   |
| G641000            | Cerebral infarction due to embolism of cerebral arteries      |
| G6X..00            | Cerebrl infarctn due/unspcf occlusn or sten/cerebrl artrts    |
| G640000            | Cerebral infarction due to thrombosis of cerebral arteries    |
| G671.00            | Generalised ischaemic cerebrovascular disease NOS             |
| G6W..00            | Cereb infarct due unsp occlus/stenos precerebr arteries       |
| L440.12            | Stroke in the puerperium                                      |
| G63..11            | Infarction - precerebral                                      |
| Gyu6300            | [X]Cerebrl infarctn due/unspcf occlusn or sten/cerebrl artrts |
| Gyu6G00            | [X]Cereb infarct due unsp occlus/stenos precerebr arteries    |
| CVA<br>unspecified | February 2009                                                 |
| G66..00            | Stroke and cerebrovascular accident unspecified               |
| G66..13            | CVA - Cerebrovascular accident unspecified                    |

|         |                                    |
|---------|------------------------------------|
| G66..12 | Stroke unspecified                 |
| G667.00 | Left sided CVA                     |
| G663.00 | Brain stem stroke syndrome         |
| G668.00 | Right sided CVA                    |
| G664.00 | Cerebellar stroke syndrome         |
| G660.00 | Middle cerebral artery syndrome    |
| G662.00 | Posterior cerebral artery syndrome |
| G661.00 | Anterior cerebral artery syndrome  |
| G665.00 | Pure motor lacunar syndrome        |
| G666.00 | Pure sensory lacunar syndrome      |
| Gyu6400 | [X]Other cerebral infarction       |
| 8Hd6.00 | Admission to stroke unit           |

## Code lists: Myocardial infarction

| Readcode | Description                                                 |
|----------|-------------------------------------------------------------|
| G30..00  | Acute myocardial infarction                                 |
| G30..14  | Heart attack                                                |
| G30..15  | MI - acute myocardial infarction                            |
| G308.00  | Inferior myocardial infarction NOS                          |
| G307.00  | Acute subendocardial infarction                             |
| G301.00  | Other specified anterior myocardial infarction              |
| 323..00  | ECG: myocardial infarction                                  |
| G302.00  | Acute inferolateral infarction                              |
| G307100  | Acute non-ST segment elevation myocardial infarction        |
| G300.00  | Acute anterolateral infarction                              |
| G30X000  | Acute ST segment elevation myocardial infarction            |
| G30..11  | Attack - heart                                              |
| G30z.00  | Acute myocardial infarction NOS                             |
| G301z00  | Anterior myocardial infarction NOS                          |
| G305.00  | Lateral myocardial infarction NOS                           |
| G30..17  | Silent myocardial infarction                                |
| G301100  | Acute anteroseptal infarction                               |
| G35..00  | Subsequent myocardial infarction                            |
| G310.00  | Postmyocardial infarction syndrome                          |
| G361.00  | Atrial septal defect/curr comp folow acut myocardal infarct |
| G304.00  | Posterior myocardial infarction NOS                         |
| G360.00  | Haemopericardium/current comp folow acut myocard infarct    |
| G366.00  | Thrombosis atrium,auric append&vent/curr comp foll acute MI |
| G303.00  | Acute inferoposterior infarction                            |
| G30X.00  | Acute transmural myocardial infarction of unspecif site     |

|         |                                                              |
|---------|--------------------------------------------------------------|
| G30..13 | Cardiac rupture following myocardial infarction (MI)         |
| G38..00 | Postoperative myocardial infarction                          |
| G30B.00 | Acute posterolateral myocardial infarction                   |
| G30y.00 | Other acute myocardial infarction                            |
| G36..00 | Certain current complication follow acute myocardial infarct |
| G362.00 | Ventric septal defect/curr comp fol acut myocardal infarctn  |
| G351.00 | Subsequent myocardial infarction of inferior wall            |
| G301000 | Acute anteroapical infarction                                |
| G30y200 | Acute septal infarction                                      |
| G384.00 | Postoperative subendocardial myocardial infarction           |
| G350.00 | Subsequent myocardial infarction of anterior wall            |
| G30yz00 | Other acute myocardial infarction NOS                        |
| G380.00 | Postoperative transmural myocardial infarction anterior wall |
| G35X.00 | Subsequent myocardial infarction of unspecified site         |
| G381.00 | Postoperative transmural myocardial infarction inferior wall |
| G311011 | MI - myocardial infarction aborted                           |
| 323Z.00 | ECG: myocardial infarct NOS                                  |
| G363.00 | Ruptur cardiac wall w/out haemopericard/cur comp fol ac MI   |
| G364.00 | Ruptur chordae tendinae/curr comp fol acute myocard infarct  |
| G311000 | Myocardial infarction aborted                                |
| 889A.00 | Diab mellit insulin-glucose infus acute myocardial infarct   |
| G306.00 | True posterior myocardial infarction                         |
| G38z.00 | Postoperative myocardial infarction, unspecified             |
| G365.00 | Rupture papillary muscle/curr comp fol acute myocard infarct |
| G353.00 | Subsequent myocardial infarction of other sites              |
| Gyu3400 | [X]Acute transmural myocardial infarction of unspecif site   |
| Gyu3600 | [X]Subsequent myocardial infarction of unspecified site      |
| G383.00 | Postoperative transmural myocardial infarction unspec site   |
| Gyu3500 | [X]Subsequent myocardial infarction of other sites           |

## Outcome Events: Fractures

| READ Code | Description                                   |
|-----------|-----------------------------------------------|
| S34..00   | Fracture of ankle                             |
| S34x.00   | Closed fracture ankle, unspecified            |
| S348.00   | Fracture of medial malleolus                  |
| 7K1L800   | Closed reduction of fracture of ankle         |
| S340.00   | Closed fracture ankle, medial malleolus       |
| S349.00   | Fracture of lateral malleolus                 |
| S342000   | Closed fracture ankle, lateral malleolus, low |
| S344.00   | Closed fracture ankle, bimalleolar            |

|         |                                                            |
|---------|------------------------------------------------------------|
| S342.00 | Closed fracture ankle, lateral malleolus                   |
| S34z.00 | Fracture of ankle, NOS                                     |
| S346.00 | Closed fracture ankle, trimalleolar                        |
| S344.11 | Dupuytren's fracture, fibula                               |
| S4G..00 | Fracture-dislocation or subluxation ankle                  |
| S4G0.00 | Closed fracture-dislocation, ankle joint                   |
| S342100 | Closed fracture ankle, lateral malleolus, high             |
| S344000 | Closed fracture ankle, bimalleolar, low fibular fracture   |
| S346100 | Closed fracture ankle, trimalleolar, high fibular fracture |
| S344100 | Closed fracture ankle, bimalleolar, high fibular fracture  |
| S346000 | Closed fracture ankle, trimalleolar, low fibular fracture  |
| S4G2.00 | Closed fracture-subluxation, ankle joint                   |
| S312300 | Closed fracture distal femur, supracondylar                |
| S312200 | Closed fracture of femur, lower epiphysis                  |
| S312.11 | Closed fracture of femur, distal end                       |
| S312.00 | Closed fracture distal femur                               |
| S4F4.00 | Closed fracture-dislocation, patello-femoral joint         |
| S312500 | Closed fracture distal femur, lateral condyle              |
| S4F6.00 | Closed fracture-subluxation, patello-femoral joint         |
| S312400 | Closed fracture distal femur, medial condyle               |
| S312000 | Closed fracture of distal femur, unspecified               |
| S312600 | Closed fracture distal femur, bicondylar (T-Y fracture)    |
| S312x00 | Closed fracture distal femur, comminuted/intra-articular   |
| S312z00 | Closed fracture of distal femur not otherwise specified    |
| S302200 | Closed fracture proximal femur, subtrochanteric            |
| S310100 | Closed fracture shaft of femur                             |
| S314.00 | Fracture of shaft of femur                                 |
| S305.00 | Subtrochanteric fracture                                   |
| S30..11 | Hip fracture                                               |
| S30..00 | Fracture of neck of femur                                  |
| S302.00 | Closed fracture of proximal femur, pertrochanteric         |
| 7K1L400 | Closed reduction of fracture of hip                        |
| S302400 | Closed fracture of femur, intertrochanteric                |
| 7K1J000 | Cls red+int fxn proximal femoral #+screw/nail device alone |
| 7K1D01E | DHS - Dynamic hip screw primary fixation of neck of femur  |
| S30y.11 | Hip fracture NOS                                           |
| 7K1D01F | Dynamic hip screw primary fixation of neck of femur        |
| S300500 | Cls # prox femur, subcapital, Garden grade unspec.         |
| S30y.00 | Closed fracture of neck of femur NOS                       |
| S302000 | Cls # proximal femur, trochanteric section, unspecified    |
| S302011 | Closed fracture of femur, greater trochanter               |
| S30w.00 | Closed fracture of unspecified proximal femur              |
| S304.00 | Petrochanteric fracture                                    |

|         |                                                              |
|---------|--------------------------------------------------------------|
| S300700 | Closed fracture proximal femur, subcapital, Garden grade II  |
| S300900 | Closed fracture proximal femur, subcapital, Garden grade IV  |
| S300600 | Closed fracture proximal femur, subcapital, Garden grade I   |
| 7K1J500 | Primary int fxn(no red) prox fem #+screw/nail device alone   |
| S300400 | Closed fracture head of femur                                |
| S300800 | Closed fracture proximal femur, subcapital, Garden grade III |
| S300.00 | Closed fracture proximal femur, transcervical                |
| 7K1J700 | Primary int fxn(no red) prox fem #+screw/nail+plate device   |
| 7K1Jd00 | Closed reduction of intracapsular # NOF internal fixat DHS   |
| S300000 | Cls # prox femur, intracapsular section, unspecified         |
| 7K1J012 | Cl red intracaps fract neck femur fix - Smith-Petersen nail  |
| 7K1J600 | Primary int fxn(no red) prox fem #+scrw/nail+intramed device |
| S302z00 | Cls # of proximal femur, pertrochanteric section, NOS        |
| S302100 | Closed fracture proximal femur, intertrochanteric, two part  |
| S300A00 | Closed fracture of femur, upper epiphysis                    |
| 7K1JD00 | Primary cls red+int fxn prox fem #+screw/nail+plate device   |
| S302012 | Closed fracture of femur, lesser trochanter                  |
| S300y00 | Closed fracture proximal femur, other transcervical          |
| S302300 | Cls # proximal femur, intertrochanteric, comminuted          |
| S300311 | Closed fracture, base of neck of femur                       |
| S300300 | Closed fracture proximal femur, basicervical                 |
| 7K1J011 | Cl red intracaps frac neck femur fix-Garden cannulated screw |
| 7K1JC00 | Prim cls rd+int fxn prox fem #+screw/nail+intramdulry device |
| 7K1JB00 | Primary cls red+int fxn prox fem #+screw/nail device alone   |
| 7K1J013 | Cls red+int fxn prox femoral #+Richard's cannulat hip screw  |
| S300z00 | Closed fracture proximal femur, transcervical, NOS           |
| S300200 | Closed fracture proximal femur, midcervical section          |
| S300y11 | Closed fracture of femur, subcapital                         |
| S300100 | Closed fracture proximal femur, transepiphyseal              |
| 7K1K300 | Primary external fixation(without reduction) prox femoral #  |
| 7K1K500 | Primary cls reduction+external fixation proximal femoral #   |
| 7K1Y000 | Remanip intracap fract neck fem and fix using nail or screw  |
| S10B600 | Multiple fractures of lumbar spine and pelvis                |
| S10B.00 | Fracture of lumbar spine and pelvis                          |
| S32..00 | Fracture of patella                                          |
| S20..00 | Fracture of clavicle                                         |
| S22..00 | Fracture of humerus                                          |
| S31z.00 | Fracture of femur, NOS                                       |
| S339.00 | Fracture of fibula alone                                     |
| S23x211 | Fracture of ulna NOS                                         |
| S21..00 | Fracture of scapula                                          |
| S28..11 | Ill-defined fracture of arm                                  |
| S224.11 | Elbow fracture - closed                                      |

|         |                                                            |
|---------|------------------------------------------------------------|
| S228.00 | Fracture of lower end of humerus                           |
| S237.00 | Fracture of upper end of radius                            |
| S3...11 | Leg fracture                                               |
| S28z.00 | Ill-defined fractures of upper limb NOS                    |
| S122.00 | Closed fracture sternum                                    |
| S210300 | Closed fracture scapula, glenoid                           |
| S20..11 | Collar bone fracture                                       |
| S33x100 | Closed fracture of fibula, unspecified part, NOS           |
| S352300 | Closed fracture cuboid                                     |
| S242300 | Multiple fractures of metacarpal bones                     |
| S210400 | Closed fracture scapula, blade                             |
| S2...11 | Arm fracture                                               |
| S2...00 | Fracture of upper limb                                     |
| 7K1J.00 | Closed (or no) reduction of fracture and internal fixation |
| S312100 | Closed fracture of femoral condyle, unspecified            |
| S339000 | Closed fracture of distal fibula                           |
| S310.00 | Closed fracture of femur, shaft or unspecified part        |
| S224100 | Closed fracture distal humerus, supracondylar              |
| S230600 | Closed fracture radius, head                               |
| 7K1LE00 | Closed reduction of fracture of elbow                      |
| S31..00 | Other fracture of femur                                    |
| S350.11 | Heel bone fracture                                         |
| S4A0.00 | Closed fracture-dislocation shoulder                       |
| S315.00 | Fracture of lower end of femur                             |
| ZV67400 | [V]Fracture follow-up                                      |
| S224600 | Closed fracture distal humerus, lateral epicondyle         |
| 7K1L600 | Closed reduction of fracture of knee                       |
| 7K1LJ00 | Closed reduction of fracture of thumb                      |
| S3...00 | Fracture of lower limb                                     |
| S3x3.00 | Multiple fractures of lower leg                            |
| S4B0000 | Closed fracture-dislocation elbow joint                    |
| S230100 | Closed fracture olecranon, extra-articular                 |
| S22z.00 | Fracture of humerus NOS                                    |
| S21..11 | Shoulder blade fracture                                    |
| S3X..00 | Fracture of lower leg, part unspecified                    |
| 7K1LB00 | Closed reduction of fracture of hallux                     |
| N331M00 | Fragility fracture due to unspecified osteoporosis         |
| S128.00 | Fracture of sternum                                        |
| S230B00 | Closed fracture olecranon, intra-articular                 |
| S224.00 | Closed fracture of the distal humerus                      |
| S23x.00 | Closed fracture of radius and ulna, unspecified part       |
| S210100 | Closed fracture scapula, acromion                          |
| S292.00 | Multiple fractures of clavicle, scapula and humerus        |

|         |                                                            |
|---------|------------------------------------------------------------|
| S240700 | Closed fracture capitae                                    |
| S23x100 | Closed fracture of radius (alone), unspecified             |
| S224200 | Closed fracture distal humerus, lateral condyle            |
| NyuB800 | [X]Unspecified osteoporosis with pathological fracture     |
| 7K1L500 | Closed reduction of fracture of femur                      |
| S222000 | Closed fracture of humerus NOS                             |
| S310012 | Upper leg fracture NOS                                     |
| S4A2100 | Closed fracture-subluxation acromio-clavicular joint       |
| 7K1K.00 | Closed (or no) reduction of fracture and external fixation |
| N331600 | Idiopathic osteoporosis with pathological fracture         |
| S210.00 | Closed fracture of scapula                                 |
| S4A0100 | Closed fracture-dislocation acromio-clavicular joint       |
| S12z.12 | Sternum fracture NOS                                       |
| S20z.00 | Fracture of clavicle NOS                                   |
| S200z00 | Closed fracture of clavicle NOS                            |
| S200200 | Closed fracture clavicle, shaft                            |
| S224800 | Closed fracture distal humerus, capitellum                 |
| S332100 | Closed fracture shaft of fibula                            |
| S224700 | Closed fracture distal humerus, medial epicondyle          |
| S200300 | Closed fracture clavicle, lateral end                      |
| S2z..00 | Fracture of upper limb NOS                                 |
| S352111 | Closed fracture of astragalus                              |
| S227.00 | Fracture of shaft of humerus                               |
| S29..11 | Multiple fractures of arm                                  |
| S224400 | Closed fracture of distal humerus, condyle(s) unspecified  |
| S320.00 | Closed fracture of the patella                             |
| S236.00 | Fracture of upper end of ulna                              |
| N331300 | Osteoporosis of disuse with pathological fracture          |
| S224z00 | Closed fracture of distal humerus, not otherwise specified |
| S330100 | Closed fracture proximal fibula                            |
| S4F2.00 | Closed fracture-subluxation, knee joint                    |
| S4B0.00 | Closed fracture-dislocation elbow                          |
| S4A0000 | Closed fracture-dislocation shoulder joint                 |
| S224000 | Closed fracture of elbow, unspecified part                 |
| S200.00 | Closed fracture of clavicle                                |
| S21z.00 | Fracture of scapula NOS                                    |
| S2A..00 | Fracture of upper limb, level unspecified                  |
| S230900 | Closed fracture of the proximal radius                     |
| S37..00 | Fracture of lower limb, level unspecified                  |
| S230000 | Closed fracture of proximal forearm, unspecified part      |
| S230800 | Closed fracture proximal radius, comminuted                |
| S230400 | Closed fracture of proximal ulna, comminuted               |
| S230500 | Closed fracture of the proximal ulna                       |



|         |                                                            |
|---------|------------------------------------------------------------|
| S350100 | Closed fracture calcaneus, intra-articular                 |
| S210200 | Closed fracture scapula, coracoid                          |
| S32z.00 | Fracture of patella, NOS                                   |
| S232300 | Closed fracture radius and ulna, middle                    |
| S33x.11 | Lower leg fracture NOS                                     |
| S4A2.00 | Closed fracture-subluxation shoulder                       |
| S352H00 | Closed fracture of cuneiforms                              |
| S210600 | Closed fracture scapula, neck                              |
| S352800 | Closed fracture talus, head                                |
| S310000 | Closed fracture of femur, unspecified part                 |
| S210000 | Closed fracture of scapula, unspecified part               |
| 7K1LN00 | Closed reduction of fracture of upper limb                 |
| N331B00 | Postmenopausal osteoporosis with pathological fracture     |
| S224300 | Closed fracture distal humerus, medial condyle             |
| S370.00 | Closed fracture of lower limb, level unspecified           |
| S4F0.00 | Closed fracture-dislocation, knee joint                    |
| S292000 | Closed multiple fractures of clavicle, scapula and humerus |
| S320400 | Closed fracture patella, comminuted (stellate)             |
| S232100 | Closed fracture of the radial shaft                        |
| S230.00 | Closed fracture of proximal radius and ulna                |
| S320200 | Closed fracture patella, distal pole                       |
| S230A00 | Closed fracture radius and ulna, proximal                  |
| S200100 | Closed fracture clavicle, medial end                       |
| S200000 | Closed fracture of clavicle, unspecified part              |
| S352A00 | Closed fracture talus, body                                |
| N331500 | Drug-induced osteoporosis with pathological fracture       |
| S352900 | Closed fracture talus, neck                                |
| S280.00 | Closed ill-defined fractures of upper limb                 |
| ZV66400 | [V]Convalescence after treatment of fracture               |
| S210500 | Closed fracture scapula, spine                             |
| S28..00 | Ill-defined fractures of upper limb                        |
| S320000 | Closed fracture patella, transverse                        |
| S352600 | Closed fracture lateral cuneiform                          |
| S320100 | Closed fracture patella, proximal pole                     |
| S224500 | Closed fracture of distal humerus, trochlea                |
| S310z00 | Closed fracture of shaft or unspecified part, NOS          |
| S330900 | Closed fracture fibula, neck                               |
| S330800 | Closed fracture fibula, head                               |
| Zw01.00 | [Q] Fractures involving the epiphyseal plate               |
| S224900 | Closed fracture distal humerus, bicondylar (T-Y fracture)  |
| S12X.00 | Fracture of bony thorax, part unspecified                  |
| S320300 | Closed fracture patella, vertical                          |
| 7K1LC00 | Closed reduction of fracture of lower limb                 |

|         |                                                              |
|---------|--------------------------------------------------------------|
| SR16000 | Closed fracture inv thorax wth low back and pelvis and limbs |
| NyuB000 | [X]Other osteoporosis with pathological fracture             |
| S210z00 | Closed fracture of scapula NOS                               |
| S350000 | Closed fracture calcaneus, extra-articular                   |
| S4B2.00 | Closed fracture-subluxation elbow                            |
| S4A2000 | Closed fracture-subluxation shoulder joint                   |
| S4J2000 | Closed fracture-subluxation of sternum                       |
| S224x00 | Closed fracture of distal humerus, multiple                  |
| S4J0000 | Closed fracture-dislocation of sternum                       |
| S4B2000 | Closed fracture-subluxation elbow joint                      |
| S29..13 | Multiple fractures of sternum                                |
| Syu7200 | [X]Fractures of other parts of femur                         |
| SR1z000 | [X]Closed multiple fractures unspecified                     |
| SR12000 | Closed fractures involving multiple regions of one upp limb  |
| N331N00 | Fragility fracture                                           |
| N331M11 | Minimal trauma fracture due to unspecified osteoporosis      |
| N331N11 | Minimal trauma fracture                                      |
| Zw02500 | [Q] Refracture                                               |
| S294000 | Cl fractures involving multiple regions of both upper limbs  |
| S12y000 | Closed fracture of other parts of bony thorax                |
| Syu8300 | [X]Fractures of other parts of lower leg                     |
| Syu4200 | [X]Multiple fractures of clavicle, scapula and humerus       |
| Syu9400 | [X]Fracture of other tarsal bones                            |
| S12y.00 | Fracture of other parts of bony thorax                       |
| Syu8D00 | [X]Fracture of lower leg, part unspecified                   |
| SR15000 | Cl fractures involving multiple regions upper with lower lmb |
| S106000 | Closed compression fracture sacrum                           |
| S130.00 | Closed fracture acetabulum                                   |
| S130z00 | Closed fracture acetabulum NOS                               |
| S130200 | Closed fracture acetabulum, anterior column                  |
| S130000 | Closed fracture acetabulum, anterior lip alone               |
| S130600 | Closed fracture acetabulum, double column unspecified        |
| S130400 | Closed fracture acetabulum, floor                            |
| S130300 | Closed fracture acetabulum, posterior column                 |
| S130100 | Closed fracture acetabulum, posterior lip alone              |
| S134800 | Closed fracture dislocation of sacro-iliac joint             |
| S134000 | Closed fracture of ilium, unspecified                        |
| S13y.00 | Closed fracture of pelvis NOS                                |
| S134500 | Closed fracture pelvis, anterior inferior iliac spine        |
| S134400 | Closed fracture pelvis, anterior superior iliac spine        |
| S108.00 | Closed fracture pelvis, coccyx                               |
| S134600 | Closed fracture pelvis, iliac wing                           |
| S134300 | Closed fracture pelvis, ischial tuberosity                   |

|         |                                                        |
|---------|--------------------------------------------------------|
| S134100 | Closed fracture pelvis, ischium                        |
| S132100 | Closed fracture pelvis, multiple pubic rami - stable   |
| S132200 | Closed fracture pelvis, multiple pubic rami - unstable |
| S132000 | Closed fracture pelvis, single pubic ramus             |
| S132.00 | Closed fracture pubis                                  |
| S132z00 | Closed fracture pubis NOS                              |
| S106.00 | Closed fracture sacrum                                 |
| S4J0100 | Closed fracture-dislocation of pelvis                  |
| S4J2100 | Closed fracture-subluxation of pelvis                  |
| S134700 | Closed vertical fracture of ilium                      |
| S106100 | Closed vertical fracture of sacrum                     |
| S10B400 | Fracture of acetabulum                                 |
| S10B200 | Fracture of coccyx                                     |
| S10B300 | Fracture of ilium                                      |
| S10B500 | Fracture of pubis                                      |
| S10B100 | Fracture of sacrum                                     |
| S13..00 | Fracture or disruption of pelvis                       |
| S134.00 | Other or multiple closed fracture of pelvis            |
| S134z00 | Other or multiple closed fracture of pelvis NOS        |
| S130y00 | Other specified closed fracture acetabulum             |
| S132y00 | Other specified closed fracture pubis                  |
| S118.00 | Closed fracture of coccyx with spinal cord lesion      |
| S116.00 | Closed fracture of sacrum with spinal cord lesion      |
| S116z00 | Closed fracture of sacrum with spinal cord lesion NOS  |
| S118z00 | Closed fracture of coccyx with spinal cord lesion NOS  |
| S120900 | Closed fracture multiple ribs                          |
| S120800 | Closed fracture of eight or more ribs                  |
| S120500 | Closed fracture of five ribs                           |
| S120400 | Closed fracture of four ribs                           |
| S120100 | Closed fracture of one rib                             |
| S120z00 | Closed fracture of rib(s) NOS                          |
| S120000 | Closed fracture of rib, unspecified                    |
| S120700 | Closed fracture of seven ribs                          |
| S120600 | Closed fracture of six ribs                            |
| S120300 | Closed fracture of three ribs                          |
| S120200 | Closed fracture of two ribs                            |
| S120.00 | Closed fracture rib                                    |
| S127100 | Cough fracture of ribs                                 |
| S127000 | Multiple fractures of ribs                             |
| S29..12 | Multiple rib fractures                                 |
| S12z.11 | Rib fracture NOS                                       |
| S127.00 | Fracture of rib                                        |
| S120A00 | Cough fracture                                         |

|         |                                                              |
|---------|--------------------------------------------------------------|
| S12..00 | Fracture of rib(s), sternum, larynx and trachea              |
| S12z.00 | Fracture of rib(s), sternum, larynx or trachea NOS           |
| S226.00 | Fracture of upper end of humerus                             |
| 7K1LF00 | Closed reduction of fracture of humerus                      |
| 7K1LG00 | Closed reduction of fracture of shoulder                     |
| S220300 | Closed fracture proximal humerus, greater tuberosity         |
| S220.00 | Closed fracture of the proximal humerus                      |
| S220100 | Closed fracture proximal humerus, neck                       |
| S222100 | Closed fracture of humerus, shaft                            |
| S220400 | Closed fracture proximal humerus, head                       |
| S220700 | Closed fracture proximal humerus, four part                  |
| S220200 | Closed fracture of proximal humerus, anatomical neck         |
| S222.00 | Closed fracture of humerus, shaft or unspecified part        |
| S220z00 | Closed fracture of proximal humerus not otherwise specified  |
| S220600 | Closed fracture proximal humerus, three part                 |
| S220000 | Closed fracture of proximal humerus, unspecified part        |
| S220500 | Closed fracture of humerus, upper epiphysis                  |
| Syu4300 | [X]Fracture of other parts of shoulder and upper arm         |
| Syu4400 | [X]Fracture of shoulder and upper arm, unspecified           |
| S222z00 | Closed fracture of humerus, shaft or unspecified part NOS    |
| S104.00 | Closed fracture lumbar vertebra                              |
| S104000 | Closed fracture lumbar vertebra, burst                       |
| S104500 | Closed fracture lumbar vertebra, posterior arch              |
| S104300 | Closed fracture lumbar vertebra, spinous process             |
| S104200 | Closed fracture lumbar vertebra, spondylolysis               |
| S104400 | Closed fracture lumbar vertebra, transverse process          |
| S104600 | Closed fracture lumbar vertebra, tricolumnar                 |
| S104100 | Closed fracture lumbar vertebra, wedge                       |
| S114.00 | Closed fracture of lumbar spine with spinal cord lesion      |
| S11x.00 | Closed fracture of spine with spinal cord lesion unspecified |
| S10x.00 | Closed fracture of spine, unspecified,                       |
| S112z00 | Closed fracture of thoracic spine with cord lesion NOS       |
| S112.00 | Closed fracture of thoracic spine with spinal cord lesion    |
| S102.00 | Closed fracture thoracic vertebra                            |
| S102z00 | Closed fracture thoracic vertebra not otherwise specified    |
| S102000 | Closed fracture thoracic vertebra, burst                     |
| S102500 | Closed fracture thoracic vertebra, posterior arch            |
| S102300 | Closed fracture thoracic vertebra, spinous process           |
| S102200 | Closed fracture thoracic vertebra, spondylolysis             |
| S102400 | Closed fracture thoracic vertebra, transverse process        |
| S102100 | Closed fracture thoracic vertebra, wedge                     |
| S150000 | Closed multiple fractures of thoracic spine                  |
| S114500 | Closed spinal fracture with cauda equina lesion              |

|         |                                                              |
|---------|--------------------------------------------------------------|
| S114100 | Closed spinal fracture with complete lumbar cord lesion      |
| S114000 | Closed spinal fracture with unspecified lumbar cord lesion   |
| S112700 | Cls spinal fracture with complete thorac cord lesion, T7-12  |
| S112A00 | Cls spinal fracture with posterior thorac cord lesion, T7-12 |
| S112600 | Cls spinal fracture with unspec thoracic cord lesion, T7-12  |
| S112100 | Cls spinal fracture wth complete thoracic cord lesion,T1-6   |
| N1y1.00 | Fatigue fracture of vertebra                                 |
| S150.00 | Multiple fractures of thoracic spine                         |
| N331A00 | Osteoporosis + pathological fracture cervical vertebrae      |
| N331800 | Osteoporosis + pathological fracture lumbar vertebrae        |
| N331900 | Osteoporosis + pathological fracture thoracic vertebrae      |
| 7J41500 | Balloon kyphoplasty of fracture of spine                     |
| S112000 | Cls spinal fracture with unspec thoracic cord lesion,T1-6    |
| S10B000 | Fracture of lumbar vertebra                                  |
| S10..00 | Fracture of spine without mention of spinal cord injury      |
| S10z.00 | Fracture of spine without mention of spinal cord lesion NOS  |
| S15..00 | Fracture of thoracic vertebra                                |
| S10..12 | Fracture of vertebra without spinal cord lesion              |
| S102y00 | Other specified closed fracture thoracic vertebra            |
| N331100 | Pathological fracture of lumbar vertebra                     |
| N331000 | Pathological fracture of thoracic vertebra                   |
| 7J42600 | Primary bedrest stabilisation of spinal fracture             |
| 7J42900 | Primary cast stabilisation of spinal fracture                |
| 7J41300 | Vertebroplasty of fracture of spine                          |
| S33x000 | Closed fracture of tibia, unspecified part, NOS              |
| S33..00 | Fracture of tibia and fibula                                 |
| S33x200 | Closed fracture of tibia and fibula, unspecified part        |
| 7K1L700 | Closed reduction of fracture of tibia and or fibula          |
| S337.00 | Fracture of shaft of tibia                                   |
| S334100 | Closed fracture distal tibia, intra-articular                |
| S338.00 | Fracture of lower end of tibia                               |
| S33z.00 | Fracture of tibia and fibula, NOS                            |
| S334.00 | Closed fracture distal tibia                                 |
| S33x.00 | Closed fracture of tibia and fibula, unspecified part, NOS   |
| S332.00 | Closed fracture of tibia/fibula, shaft                       |
| S332200 | Closed fracture of tibia and fibula, shaft                   |
| S332000 | Closed fracture shaft of tibia                               |
| S334000 | Closed fracture distal tibia, extra-articular                |
| S33xz00 | Closed fracture of tibia and fibula, unspecified part, NOS   |
| S332z00 | Closed fracture of tibia and fibula, shaft, NOS              |
| S33A.00 | Fracture of tibia                                            |
| S33C.00 | Closed fracture of distal tibia and fibula                   |
| S336.00 | Fracture of upper end of tibia                               |

|         |                                                            |
|---------|------------------------------------------------------------|
| S330300 | Closed fracture proximal tibia, medial condyle (plateau)   |
| S330400 | Closed fracture proximal tibia, lateral condyle (plateau)  |
| S330012 | Closed fracture of tibial tuberosity                       |
| S330000 | Closed fracture of the proximal tibia                      |
| S330600 | Closed fracture spine, tibia                               |
| S330700 | Closed fracture tubercle, tibia                            |
| S330500 | Closed fracture proximal tibia, bicondylar                 |
| S330z00 | Closed fracture of tibia and fibula, proximal NOS          |
| S330.00 | Closed fracture of tibia and fibula, proximal              |
| S330011 | Closed fracture of tibial condyles                         |
| S330200 | Closed fracture of tibia and fibula, proximal              |
| S336000 | Fracture tibial plateau                                    |
| Syu5400 | [X]Fracture of forearm, unspecified                        |
| Syu5300 | [X]Fracture of other parts of forearm                      |
| S234A00 | Closed dorsal Barton's fracture                            |
| S234F00 | Closed Barton's fracture                                   |
| S234100 | Closed Colles' fracture                                    |
| S234A11 | Closed dorsal Barton's fracture-dislocation                |
| S234D00 | Closed fracture distal radius, extra-articular, other type |
| S234C00 | Closed fracture distal radius, intra-articular, die-punch  |
| S234E00 | Closed fracture distal radius, intra-articular, other type |
| S234500 | Closed fracture distal ulna, unspecified                   |
| S234z00 | Closed fracture of forearm, lower end, NOS                 |
| S234000 | Closed fracture of forearm, lower end, unspecified         |
| S23x000 | Closed fracture of forearm, unspecified                    |
| S234.00 | Closed fracture of radius and ulna, lower end              |
| S234200 | Closed fracture of the distal radius, unspecified          |
| S23x300 | Closed fracture of the radius and ulna                     |
| S23x200 | Closed fracture of ulna (alone), unspecified               |
| S230200 | Closed fracture of ulna, coronoid                          |
| S234400 | Closed fracture of ulna, lower epiphysis                   |
| S234300 | Closed fracture of ulna, styloid process                   |
| S234B00 | Closed fracture radial styloid                             |
| S234600 | Closed fracture radius and ulna, distal                    |
| S4C0000 | Closed fracture-dislocation distal radio-ulnar joint       |
| S4C0100 | Closed fracture-dislocation radiocarpal joint              |
| READ.00 | Closed fracture-subluxation of the wrist                   |
| S4C2100 | Closed fracture-subluxation radiocarpal joint              |
| S4C2000 | Closed fracture-subluxation, distal radio-ulnar jt         |
| S234800 | Closed Galeazzi fracture                                   |
| S230300 | Closed Monteggia's fracture                                |
| S234700 | Closed Smith's fracture                                    |
| S234211 | Dupuytren's fracture, radius - closed                      |

|         |                                                             |
|---------|-------------------------------------------------------------|
| S23..11 | Forearm fracture                                            |
| S293.00 | Multiple fractures of forearm                               |
| S234111 | Smith's fracture - closed                                   |
| S234.11 | Wrist fracture - closed                                     |
| S234A12 | Closed dorsal Barton fracture-subluxation                   |
| S240F00 | Closed fracture carpal bones, multiple                      |
| S4C0.00 | Closed fracture dislocation of wrist                        |
| S240.00 | Closed fracture of carpal bone                              |
| S240z00 | Closed fracture of carpal bone NOS                          |
| S240000 | Closed fracture of carpal bone, unspecified                 |
| S240y00 | Closed fracture of other carpal bone                        |
| S230z00 | Closed fracture of proximal forearm not otherwise specified |
| S23xz00 | Closed fracture of radius and ulna, NOS                     |
| S232.00 | Closed fracture of radius and ulna, shaft                   |
| S232z00 | Closed fracture of radius and ulna, shaft, NOS              |
| S232000 | Closed fracture of radius, shaft, unspecified               |
| S232200 | Closed fracture of the ulnar shaft                          |
| S230700 | Closed fracture radius, neck                                |
| S4C0200 | Closed fracture-dislocation mid carpal                      |
| S4B0100 | Closed fracture-dislocation superior radio-ulnar joint      |
| S4C0300 | Closed fracture-dislocation, carpometacarpal joint          |
| S4C2200 | Closed fracture-subluxation mid carpal                      |
| S4C2y00 | Closed fracture-subluxation other carpal                    |
| S4B2100 | Closed fracture-subluxation superior radio-ulnar joint      |
| S4C2300 | Closed fracture-subluxation, carpometacarpal joint          |
| 7K1LL00 | Closed reduction of fracture of radius and or ulna          |
| 7K1LM00 | Closed reduction of fracture of wrist                       |
| S234912 | Closed volar Barton fracture-subluxation                    |
| S234900 | Closed volar Barton's fracture                              |
| S234911 | Closed volar Barton's fracture-dislocation                  |
| S242.00 | Fracture at wrist and hand level                            |
| S24..00 | Fracture of carpal bone                                     |
| S24z.00 | Fracture of carpal bone NOS                                 |
| S23C.00 | Fracture of lower end of both ulna and radius               |
| S23B.00 | Fracture of lower end of radius                             |
| S23..00 | Fracture of radius and ulna                                 |
| S23z.00 | Fracture of radius and ulna, NOS                            |
| S23x111 | Fracture of radius NOS                                      |
| S239.00 | Fracture of shaft of radius                                 |
| S238.00 | Fracture of shaft of ulna                                   |
| S23A.00 | Fracture of shafts of both ulna and radius                  |
| S4C..00 | Fracture-dislocation or subluxation of wrist                |
| S234G00 | Greenstick fracture of distal radius                        |

|         |                                                            |
|---------|------------------------------------------------------------|
| S24..11 | Hand fracture - carpal bone                                |
| Syu6300 | [X]Fracture of other carpal bone(s)                        |
| Syu6500 | [X]Fracture of other & unspecified parts of wrist and hand |

## Code lists: Preventative medication

| Product code             | dmd code           | Drug substance name | Product name                                           |
|--------------------------|--------------------|---------------------|--------------------------------------------------------|
| <b>ANTIHYPERTENSIVES</b> |                    |                     |                                                        |
| <b>ACE-inhibitors</b>    |                    |                     |                                                        |
| 4103                     | 318925003          | Trandolapril        | Trandolapril 1mg capsules                              |
| 5047                     | 318926002          | Trandolapril        | Trandolapril 2mg capsules                              |
| 7419                     | 318924004          | Trandolapril        | Trandolapril 500microgram capsules                     |
| 8025                     | 346811000001101    | Trandolapril        | Gopten 1mg capsules (Abbott Laboratories Ltd)          |
| 8026                     | 273111000001109    | Trandolapril        | Gopten 2mg capsules (Abbott Laboratories Ltd)          |
| 9948                     | 410958005          | Trandolapril        | Trandolapril 4mg capsules                              |
| 16710                    | 253511000001102    | Trandolapril        | Gopten 500microgram capsules (Abbott Laboratories Ltd) |
| 28902                    | 140511000001108    | Trandolapril        | Odrik 2mg capsules (Aventis Pharma)                    |
| 29130                    | 5651611000001103   | Trandolapril        | Gopten 4mg capsules (Abbott Laboratories Ltd)          |
| 31307                    | 227511000001106    | Trandolapril        | Odrik 500microgram capsules (Aventis Pharma)           |
| 31810                    | 432911000001102    | Trandolapril        | Odrik 1mg capsules (Aventis Pharma)                    |
| 54345                    | 15162111000001105  | Trandolapril        | Trandolapril 4mg capsules (Arrow Generics Ltd)         |
| 60757                    | 13433411000001109  | Trandolapril        | Trandolapril 500microgram capsules (Teva UK Ltd)       |
| 65389                    | 5372611000001104   | Trandolapril        | Gopten 500microgram capsules (Waymade Healthcare Plc)  |
| 65570                    | 13494811000001100  | Trandolapril        | Trandolapril 4mg capsules (Teva UK Ltd)                |
| 66623                    | 13470311000001106  | Trandolapril        | Trandolapril 2mg capsules (A A H Pharmaceuticals Ltd)  |
| 74209                    | 14407611000001105  | Trandolapril        | Trandolapril 1mg capsules (Actavis UK Ltd)             |
| 80                       | 318902004          | Ramipril            | Ramipril 5mg capsules                                  |
| 82                       | 318906001          | Ramipril            | Ramipril 10mg capsules                                 |
| 147                      | 318900007          | Ramipril            | Ramipril 1.25mg capsules                               |
| 654                      | 212915001000027107 | Ramipril            | Ramipril 2.5/ 5mg/ 10mg capsule                        |
| 709                      | 318901006          | Ramipril            | Ramipril 2.5mg capsules                                |
| 756                      | 408052000          | Ramipril            | Ramipril 10mg tablets                                  |
| 761                      | 408040007          | Ramipril            | Ramipril 1.25mg tablets                                |
| 5275                     | 835411000001105    | Ramipril            | Tritace 2.5mg capsules (Sanofi)                        |
| 5735                     | 802311000001101    | Ramipril            | Tritace 5mg capsules (Sanofi)                          |
| 6261                     | 5010511000001106   | Ramipril            | Tritace 1.25mg tablets (Sanofi)                        |
| 6288                     | 408051007          | Ramipril            | Ramipril 5mg tablets                                   |



|       |                    |          |                                                     |
|-------|--------------------|----------|-----------------------------------------------------|
| 6314  | 408050008          | Ramipril | Ramipril 2.5mg tablets                              |
| 6362  | 5011111000001108   | Ramipril | Tritace 5mg tablets (Sanofi)                        |
| 6364  | 5010811000001109   | Ramipril | Tritace 2.5mg tablets (Sanofi)                      |
| 9646  | 111611000001109    | Ramipril | Tritace 1.25mg capsules (Aventis Pharma)            |
| 9693  | 43711000001100     | Ramipril | Tritace 10mg capsules (Sanofi)                      |
| 9915  | 5011411000001103   | Ramipril | Tritace 10mg tablets (Sanofi)                       |
| 11937 | 8720711000001102   | Ramipril | Ramipril 2.5mg/ 5ml oral suspension                 |
| 28586 | 7948911000001100   | Ramipril | Lopace 5mg capsules (Discovery Pharmaceuticals)     |
| 29627 | 7948711000001102   | Ramipril | Lopace 2.5mg capsules (Discovery Pharmaceuticals)   |
| 32857 | 5587511000001109   | Ramipril | Ramipril 1.25mg capsules (Teva UK Ltd)              |
| 32934 | 7949111000001105   | Ramipril | Lopace 10mg capsules (Discovery Pharmaceuticals)    |
| 33811 | 7817811000001108   | Ramipril | Ramipril 2.5mg capsules (Ranbaxy (UK) Ltd)          |
| 33894 | 5589711000001107   | Ramipril | Ramipril 10mg capsules (Teva UK Ltd)                |
| 34357 | 5629611000001101   | Ramipril | Ramipril 10mg capsules (Genus Pharmaceuticals Ltd)  |
| 34382 | 5631411000001102   | Ramipril | Ramipril 5mg capsules (Zentiva)                     |
| 34390 | 5629311000001106   | Ramipril | Ramipril 5mg capsules (Genus Pharmaceuticals Ltd)   |
| 34412 | 5588511000001108   | Ramipril | Ramipril 5mg capsules (Teva UK Ltd)                 |
| 34429 | 7433211000001103   | Ramipril | Ramipril 5mg capsules (Mylan)                       |
| 34431 | 5631211000001101   | Ramipril | Ramipril 2.5mg capsules (Zentiva)                   |
| 34432 | 5628711000001101   | Ramipril | Ramipril 2.5mg capsules (Genus Pharmaceuticals Ltd) |
| 34490 | 5588011000001100   | Ramipril | Ramipril 2.5mg capsules (Teva UK Ltd)               |
| 34505 | 5623511000001102   | Ramipril | Ramipril 2.5mg capsules (Sandoz Ltd)                |
| 34528 | 5875911000001104   | Ramipril | Ramipril 2.5mg capsules (A A H Pharmaceuticals Ltd) |
| 34539 | 5624411000001103   | Ramipril | Ramipril 5mg capsules (Sandoz Ltd)                  |
| 34540 | 5878511000001103   | Ramipril | Ramipril 5mg capsules (A A H Pharmaceuticals Ltd)   |
| 34567 | 7433011000001108   | Ramipril | Ramipril 2.5mg capsules (Mylan)                     |
| 34583 | 147765001000027101 | Ramipril | Ramipril 10mg Capsule (Dexcel-Pharma Ltd)           |
| 34589 | 147725001000027109 | Ramipril | Ramipril 5mg Capsule (Dexcel-Pharma Ltd)            |
| 34651 | 7433511000001100   | Ramipril | Ramipril 10mg capsules (Mylan)                      |
| 34652 | 147155001000027104 | Ramipril | Ramipril 5mg Capsule (Sovereign Medical Ltd)        |
| 34657 | 5631611000001104   | Ramipril | Ramipril 10mg capsules (Zentiva)                    |
| 34698 | 7338611000001103   | Ramipril | Ramipril 1.25mg capsules (Zentiva)                  |
| 34710 | 5624611000001100   | Ramipril | Ramipril 10mg capsules (Sandoz Ltd)                 |
| 34732 | 147685001000027107 | Ramipril | Ramipril 2.5mg Capsule (Dexcel-Pharma Ltd)          |
| 34877 | 147215001000027107 | Ramipril | Ramipril 10mg Capsule (Sovereign Medical Ltd)       |
| 34893 | 153475001000027100 | Ramipril | Ramipril 10mg Capsule (IVAX Pharmaceuticals UK Ltd) |
| 34943 | 5880511000001109   | Ramipril | Ramipril 10mg capsules (A A H Pharmaceuticals Ltd)  |
| 35007 | 8720511000001107   | Ramipril | Ramipril 10mg/ 5ml oral suspension                  |
| 38308 | 251535001000027101 | Ramipril | Ramipril 2.5/ 5mg/ 10mg tablet                      |
| 39355 | 237055001000027109 | Ramipril | Tritace 10mg Tablet (Sterwin Medicines)             |
| 40384 | 5885911000001106   | Ramipril | Ramipril 10mg tablets (A A H Pharmaceuticals Ltd)   |
| 42081 | 237025001000027108 | Ramipril | Tritace 1.25mg Tablet (Sterwin Medicines)           |
| 45264 | 8266111000001102   | Ramipril | Ramipril 1.25mg capsules (Actavis UK Ltd)           |

|       |                    |          |                                                                   |
|-------|--------------------|----------|-------------------------------------------------------------------|
| 45340 | 157665001000027100 | Ramipril | Ramipril 10mg Capsule (Actavis UK Ltd)                            |
| 45554 | 8720811000001105   | Ramipril | Ramipril 5mg/ 5ml oral solution                                   |
| 46890 | 8720911000001100   | Ramipril | Ramipril 5mg/ 5ml oral suspension                                 |
| 47021 | 19877111000001100  | Ramipril | Ramipril 2.5mg/ 5ml oral solution sugar free                      |
| 47998 | 8266411000001107   | Ramipril | Ramipril 2.5mg capsules (Actavis UK Ltd)                          |
| 48008 | 8267111000001104   | Ramipril | Ramipril 5mg capsules (Actavis UK Ltd)                            |
| 48053 | 9805611000001106   | Ramipril | Ramipril 2.5mg capsules (Almus Pharmaceuticals Ltd)               |
| 49164 | 8267511000001108   | Ramipril | Ramipril 10mg capsules (Actavis UK Ltd)                           |
| 50509 | 8720411000001108   | Ramipril | Ramipril 10mg/ 5ml oral solution                                  |
| 51701 | 16065011000001105  | Ramipril | Ramipril 5mg capsules (Bristol Laboratories Ltd)                  |
| 51714 | 5921211000001103   | Ramipril | Ramipril 2.5mg capsules (Alliance Healthcare (Distribution) Ltd)  |
| 52197 | 15183911000001103  | Ramipril | Ramipril 5mg capsules (Sigma Pharmaceuticals Plc)                 |
| 52399 | 5632211000001108   | Ramipril | Ramipril 1.25mg capsules (Kent Pharmaceuticals Ltd)               |
| 52407 | 5632811000001109   | Ramipril | Ramipril 10mg capsules (Kent Pharmaceuticals Ltd)                 |
| 53612 | 5937511000001108   | Ramipril | Ramipril 10mg tablets (Alliance Healthcare (Distribution) Ltd)    |
| 53621 | 16064811000001100  | Ramipril | Ramipril 2.5mg capsules (Bristol Laboratories Ltd)                |
| 54298 | 10412211000001105  | Ramipril | Ramipril 2.5mg capsules (Arrow Generics Ltd)                      |
| 54620 | 15183111000001101  | Ramipril | Ramipril 2.5mg capsules (Sigma Pharmaceuticals Plc)               |
| 54941 | 5923011000001109   | Ramipril | Ramipril 5mg capsules (Alliance Healthcare (Distribution) Ltd)    |
| 55299 | 5873711000001102   | Ramipril | Ramipril 1.25mg capsules (A A H Pharmaceuticals Ltd)              |
| 55798 | 21878111000001106  | Ramipril | Ramipril 5mg capsules (Waymade Healthcare Plc)                    |
| 56013 | 21877911000001108  | Ramipril | Ramipril 2.5mg capsules (Waymade Healthcare Plc)                  |
| 56038 | 20005711000001100  | Ramipril | Ramipril 10mg tablets (Pfizer Ltd)                                |
| 56129 | 5632611000001105   | Ramipril | Ramipril 5mg capsules (Kent Pharmaceuticals Ltd)                  |
| 56148 | 7562211000001109   | Ramipril | Ramipril 1.25mg tablets (Kent Pharmaceuticals Ltd)                |
| 56169 | 10412711000001103  | Ramipril | Ramipril 10mg capsules (Arrow Generics Ltd)                       |
| 56356 | 5925111000001106   | Ramipril | Ramipril 10mg capsules (Alliance Healthcare (Distribution) Ltd)   |
| 56704 | 5919811000001106   | Ramipril | Ramipril 1.25mg capsules (Alliance Healthcare (Distribution) Ltd) |
| 56763 | 17921311000001109  | Ramipril | Ramipril 10mg capsules (Phoenix Healthcare Distribution Ltd)      |
| 56855 | 15182211000001101  | Ramipril | Ramipril 10mg capsules (Sigma Pharmaceuticals Plc)                |
| 57073 | 21877711000001106  | Ramipril | Ramipril 1.25mg capsules (Waymade Healthcare Plc)                 |
| 57235 | 11533411000001106  | Ramipril | Ramipril 1.25mg tablets (Sandoz Ltd)                              |
| 57346 | 21878311000001108  | Ramipril | Ramipril 10mg capsules (Waymade Healthcare Plc)                   |
| 57658 | 5881111000001106   | Ramipril | Ramipril 1.25mg tablets (A A H Pharmaceuticals Ltd)               |
| 57864 | 15184311000001102  | Ramipril | Ramipril 5mg tablets (Sigma Pharmaceuticals Plc)                  |
| 59557 | 5632411000001107   | Ramipril | Ramipril 2.5mg capsules (Kent Pharmaceuticals Ltd)                |
| 59603 | 17920911000001103  | Ramipril | Ramipril 2.5mg capsules (Phoenix Healthcare Distribution Ltd)     |
| 59788 | 16065411000001101  | Ramipril | Ramipril 10mg capsules (Bristol Laboratories Ltd)                 |
| 60730 | 17921111000001107  | Ramipril | Ramipril 5mg capsules (Phoenix Healthcare Distribution Ltd)       |
| 61067 | 11407911000001108  | Ramipril | Ramipril 5mg capsules (Almus Pharmaceuticals Ltd)                 |
| 61339 | 11408211000001100  | Ramipril | Ramipril 10mg capsules (Almus Pharmaceuticals Ltd)                |
| 61499 | 10720911000001101  | Ramipril | Ramipril 2.5mg tablets (Actavis UK Ltd)                           |
| 61694 | 7339211000001105   | Ramipril | Ramipril 5mg tablets (Zentiva)                                    |

|       |                    |           |                                                                          |
|-------|--------------------|-----------|--------------------------------------------------------------------------|
| 61985 | 5590011000001101   | Ramipril  | Ramipril 1.25mg tablets (Teva UK Ltd)                                    |
| 62036 | 21879211000001105  | Ramipril  | Ramipril 5mg tablets (Waymade Healthcare Plc)                            |
| 62039 | 7338811000001104   | Ramipril  | Ramipril 1.25mg tablets (Zentiva)                                        |
| 62918 | 8720611000001106   | Ramipril  | Ramipril 2.5mg/ 5ml oral solution                                        |
| 62958 | 5591311000001108   | Ramipril  | Ramipril 5mg tablets (Teva UK Ltd)                                       |
| 63010 | 17922811000001109  | Ramipril  | Ramipril 10mg tablets (Phoenix Healthcare Distribution Ltd)              |
| 63442 | 5590811000001107   | Ramipril  | Ramipril 2.5mg tablets (Teva UK Ltd)                                     |
| 64055 | 21878511000001102  | Ramipril  | Ramipril 2.5mg/ 5ml oral solution sugar free (Waymade Healthcare Plc)    |
| 65443 | 147275001000027104 | Ramipril  | Ramipril 1.25mg Tablet (Sovereign Medical Ltd)                           |
| 65599 | 5885211000001102   | Ramipril  | Ramipril 5mg tablets (A A H Pharmaceuticals Ltd)                         |
| 65749 | 28780011000001109  | Ramipril  | Ramipril 5mg capsules (Ennogen Pharma Ltd)                               |
| 65936 | 30087011000001109  | Ramipril  | Ramipril 5mg capsules (DE Pharmaceuticals)                               |
| 66162 | 5591911000001109   | Ramipril  | Ramipril 10mg tablets (Teva UK Ltd)                                      |
| 66329 | 244065001000027109 | Ramipril  | Ramipril oral solution                                                   |
| 66669 | 30087411000001100  | Ramipril  | Ramipril 10mg capsules (DE Pharmaceuticals)                              |
| 67719 | 30866711000001105  | Ramipril  | Ramipril 5mg capsules (Mawdsley-Brooks & Company Ltd)                    |
| 67741 | 9806011000001108   | Ramipril  | Ramipril 1.25mg capsules (Almus Pharmaceuticals Ltd)                     |
| 68192 | 32497211000001100  | Ramipril  | Ramipril 5mg capsules (Brown & Burk UK Ltd)                              |
| 68372 | 10721111000001105  | Ramipril  | Ramipril 5mg tablets (Actavis UK Ltd)                                    |
| 68480 | 30867211000001101  | Ramipril  | Ramipril 10mg capsules (Mawdsley-Brooks & Company Ltd)                   |
| 69288 | 32497411000001101  | Ramipril  | Ramipril 10mg capsules (Brown & Burk UK Ltd)                             |
| 70072 | 30865311000001101  | Ramipril  | Ramipril 1.25mg capsules (Mawdsley-Brooks & Company Ltd)                 |
| 70709 | 10721411000001100  | Ramipril  | Ramipril 10mg tablets (Actavis UK Ltd)                                   |
| 71025 | 19834511000001104  | Ramipril  | Ramipril 1.25mg tablets (APC Pharmaceuticals & Chemicals (Europe) Ltd)   |
| 71040 | 20005511000001105  | Ramipril  | Ramipril 5mg tablets (Pfizer Ltd)                                        |
| 71068 | 19834711000001109  | Ramipril  | Ramipril 2.5mg tablets (APC Pharmaceuticals & Chemicals (Europe) Ltd)    |
| 71491 | 28779811000001103  | Ramipril  | Ramipril 2.5mg capsules (Ennogen Pharma Ltd)                             |
| 72341 | 34747411000001106  | Ramipril  | Ramipril 2.5mg capsules (Wockhardt UK Ltd)                               |
| 72842 | 34747811000001108  | Ramipril  | Ramipril 10mg capsules (Wockhardt UK Ltd)                                |
| 73459 | 20007111000001105  | Ramipril  | Ramipril 2.5mg/ 5ml oral solution sugar free (A A H Pharmaceuticals Ltd) |
| 73484 | 237045001000027106 | Ramipril  | Tritace 5mg Tablet (Sterwin Medicines)                                   |
| 74066 | 13762311000001106  | Ramipril  | Ramipril 10mg tablets (Tillomed Laboratories Ltd)                        |
| 74618 | 30866311000001106  | Ramipril  | Ramipril 2.5mg capsules (Mawdsley-Brooks & Company Ltd)                  |
| 74632 | 147375001000027107 | Ramipril  | Ramipril 5mg Tablet (Sovereign Medical Ltd)                              |
| 75410 |                    | Ramipril  | Ramipril 2.5mg capsules (Brown & Burk UK Ltd)                            |
| 76548 |                    | Ramipril  | Ramipril 1.25mg capsules (Phoenix Healthcare Distribution Ltd)           |
| 76567 |                    | Ramipril  | Ramipril 1.25mg tablets (Sigma Pharmaceuticals Plc)                      |
| 76784 |                    | Ramipril  | Ramipril 5mg capsules (Wockhardt UK Ltd)                                 |
| 77129 |                    | Ramipril  | Ramipril 10mg capsules (Ennogen Pharma Ltd)                              |
| 77486 |                    | Ramipril  | Ramipril 2.5mg tablets (Alliance Healthcare (Distribution) Ltd)          |
| 77615 |                    | Ramipril  | Ramipril 1.25mg/ 5ml oral solution                                       |
| 3929  | 318886000          | Quinapril | Quinapril 10mg tablets                                                   |
| 5159  | 318887009          | Quinapril | Quinapril 20mg tablets                                                   |

|       |                    |                      |                                                                |
|-------|--------------------|----------------------|----------------------------------------------------------------|
| 6765  | 318885001          | Quinapril            | Quinapril 5mg tablets                                          |
| 7314  | 582611000001106    | Quinapril            | Accupro 5mg tablets (Pfizer Ltd)                               |
| 9731  | 318894007          | Quinapril            | Quinapril 40mg tablets                                         |
| 14477 | 231111000001106    | Quinapril            | Accupro 10mg tablets (Pfizer Ltd)                              |
| 14478 | 829111000001100    | Quinapril            | Accupro 20mg tablets (Pfizer Ltd)                              |
| 15096 | 86411000001109     | Quinapril            | Accupro 40mg tablets (Pfizer Ltd)                              |
| 38854 | 252775001000027101 | Quinapril            | Quinapril 20mg/ 5ml oral solution                              |
| 38899 | 9208111000001100   | Quinapril            | Quinil 10mg tablets (Tillomed Laboratories Ltd)                |
| 40355 | 9207711000001100   | Quinapril            | Quinil 5mg tablets (Tillomed Laboratories Ltd)                 |
| 42285 | 9208711000001104   | Quinapril            | Quinil 40mg tablets (Tillomed Laboratories Ltd)                |
| 46365 | 9208411000001105   | Quinapril            | Quinil 20mg tablets (Tillomed Laboratories Ltd)                |
| 61292 | 7392611000001105   | Quinapril            | Quinapril 40mg tablets (Mylan)                                 |
| 77116 |                    | Quinapril            | Quinapril 5mg tablets (Alliance Healthcare (Distribution) Ltd) |
| 56079 | 21939811000001102  | Perindopril tosilate | Perindopril tosilate 10mg tablets                              |
| 57333 | 21940111000001100  | Perindopril tosilate | Perindopril tosilate 5mg tablets                               |
| 57944 | 21939911000001107  | Perindopril tosilate | Perindopril tosilate 2.5mg tablets                             |
| 97    | 318897000          | Perindopril erbumine | Perindopril erbumine 4mg tablets                               |
| 593   | 318896009          | Perindopril erbumine | Perindopril erbumine 2mg tablets                               |
| 5612  | 48211000001104     | Perindopril erbumine | Coversyl 2mg tablets (Servier Laboratories Ltd)                |
| 5800  | 902211000001100    | Perindopril erbumine | Coversyl 4mg tablets (Servier Laboratories Ltd)                |
| 6078  | 374667004          | Perindopril erbumine | Perindopril erbumine 8mg tablets                               |
| 11983 | 8671311000001103   | Perindopril erbumine | Perindopril erbumine 4mg/ 5ml oral suspension                  |
| 14960 | 3803711000001101   | Perindopril erbumine | Coversyl 8mg tablets (Servier Laboratories Ltd)                |
| 33095 | 10828711000001103  | Perindopril erbumine | Perindopril erbumine 4mg tablets (A A H Pharmaceuticals Ltd)   |
| 35731 | 10829111000001106  | Perindopril erbumine | Perindopril erbumine 8mg tablets (A A H Pharmaceuticals Ltd)   |
| 38285 | 11879911000001102  | Perindopril erbumine | Perindopril erbumine 4mg tablets (Teva UK Ltd)                 |
| 38510 | 13767811000001104  | Perindopril erbumine | Perindopril erbumine 4mg tablets (Apotex UK Ltd)               |
| 43012 | 244345001000027102 | Perindopril Erbumine | Perindopril erbumine oral solution                             |
| 43813 | 12498511000001100  | Perindopril erbumine | Perindopril erbumine 2mg tablets (Actavis UK Ltd)              |
| 45319 | 10828511000001108  | Perindopril erbumine | Perindopril erbumine 2mg tablets (A A H Pharmaceuticals Ltd)   |
| 45938 | 11880111000001100  | Perindopril erbumine | Perindopril erbumine 8mg tablets (Teva UK Ltd)                 |
| 48049 | 16631411000001104  | Perindopril erbumine | Perindopril erbumine 2mg tablets (Mylan)                       |
| 48180 | 13652011000001107  | Perindopril erbumine | Perindopril erbumine 4mg tablets (Sandoz Ltd)                  |
| 48214 | 12498711000001105  | Perindopril erbumine | Perindopril erbumine 4mg tablets (Actavis UK Ltd)              |
| 49491 | 14126011000001109  | Perindopril erbumine | Perindopril erbumine 2mg tablets (Consilient Health Ltd)       |
| 50402 | 193395001000027104 | Perindopril erbumine | Perindopril 2mg Tablet (Servier Laboratories Ltd)              |
| 53058 | 20319211000001109  | Perindopril erbumine | Perindopril erbumine 8mg tablets (Sandoz Ltd)                  |
| 54733 | 17218111000001108  | Perindopril erbumine | Perindopril erbumine 8mg tablets (Consilient Health Ltd)       |
| 54899 | 11879711000001104  | Perindopril erbumine | Perindopril erbumine 2mg tablets (Teva UK Ltd)                 |
| 54942 | 16631011000001108  | Perindopril erbumine | Perindopril erbumine 8mg tablets (Mylan)                       |
| 54986 | 14057411000001109  | Perindopril erbumine | Perindopril erbumine 8mg/ 5ml oral suspension                  |
| 56162 | 14126311000001107  | Perindopril erbumine | Perindopril erbumine 4mg tablets (Consilient Health Ltd)       |
| 56472 | 10743211000001103  | Perindopril erbumine | Perindopril erbumine 4mg tablets (Kent Pharmaceuticals Ltd)    |

|       |                    |                      |                                                                           |
|-------|--------------------|----------------------|---------------------------------------------------------------------------|
| 56473 | 15156311000001100  | Perindopril erbumine | Perindopril erbumine 2mg tablets (Sigma Pharmaceuticals Plc)              |
| 56506 | 5535211000001106   | Perindopril erbumine | Coversyl 2mg tablets (Dowelhurst Ltd)                                     |
| 56508 | 5538211000001104   | Perindopril erbumine | Coversyl 4mg tablets (Dowelhurst Ltd)                                     |
| 56516 | 13651711000001102  | Perindopril erbumine | Perindopril erbumine 2mg tablets (Sandoz Ltd)                             |
| 57701 | 12498911000001107  | Perindopril erbumine | Perindopril erbumine 8mg tablets (Actavis UK Ltd)                         |
| 57801 | 15639211000001104  | Perindopril erbumine | Perindopril erbumine 4mg tablets (Glenmark Pharmaceuticals Europe Ltd)    |
| 58843 | 10742711000001102  | Perindopril erbumine | Perindopril erbumine 2mg tablets (Kent Pharmaceuticals Ltd)               |
| 58874 | 18426311000001107  | Perindopril erbumine | Perindopril erbumine 2mg tablets (Somex Pharma)                           |
| 59770 | 22378411000001100  | Perindopril erbumine | Perindopril erbumine 4mg tablets (Aurobindo Pharma Ltd)                   |
| 59790 | 20168911000001102  | Perindopril erbumine | Perindopril erbumine 8mg tablets (Accord Healthcare Ltd)                  |
| 59972 | 12060711000001101  | Perindopril erbumine | Perindopril erbumine 2mg tablets (Alliance Healthcare (Distribution) Ltd) |
| 60065 | 15156711000001101  | Perindopril erbumine | Perindopril erbumine 4mg tablets (Sigma Pharmaceuticals Plc)              |
| 61117 | 23471511000001106  | Perindopril erbumine | Perindopril erbumine 4mg/ 5ml oral solution                               |
| 61270 | 21296211000001103  | Perindopril erbumine | Perindopril erbumine 4mg tablets (Accord Healthcare Ltd)                  |
| 61693 | 22378211000001104  | Perindopril erbumine | Perindopril erbumine 8mg tablets (Aurobindo Pharma Ltd)                   |
| 64602 | 21845111000001102  | Perindopril erbumine | Perindopril erbumine 2mg tablets (Waymade Healthcare Plc)                 |
| 65273 | 16631211000001103  | Perindopril erbumine | Perindopril erbumine 4mg tablets (Mylan)                                  |
| 66060 | 30075311000001109  | Perindopril erbumine | Perindopril erbumine 2mg tablets (DE Pharmaceuticals)                     |
| 67269 | 5352011000001109   | Perindopril erbumine | Coversyl 2mg tablets (Waymade Healthcare Plc)                             |
| 67789 | 21295411000001108  | Perindopril erbumine | Perindopril erbumine 2mg tablets (Accord Healthcare Ltd)                  |
| 68021 | 12061211000001102  | Perindopril erbumine | Perindopril erbumine 4mg tablets (Alliance Healthcare (Distribution) Ltd) |
| 68381 | 30856611000001105  | Perindopril erbumine | Perindopril erbumine 4mg tablets (Mawdsley-Brooks & Company Ltd)          |
| 68759 | 22378611000001102  | Perindopril erbumine | Perindopril erbumine 2mg tablets (Aurobindo Pharma Ltd)                   |
| 69016 | 30075711000001108  | Perindopril erbumine | Perindopril erbumine 8mg tablets (DE Pharmaceuticals)                     |
| 70916 | 15639611000001102  | Perindopril erbumine | Perindopril erbumine 8mg tablets (Glenmark Pharmaceuticals Europe Ltd)    |
| 70917 | 15639011000001109  | Perindopril erbumine | Perindopril erbumine 2mg tablets (Glenmark Pharmaceuticals Europe Ltd)    |
| 71004 | 21296511000001100  | Perindopril erbumine | Perindopril erbumine 8mg tablets (Accord Healthcare Ltd)                  |
| 72295 | 196145001000027107 | Perindopril erbumine | Perindopril 2mg Tablet (Neo Laboratories Ltd)                             |
| 72941 | 13011311000001104  | Perindopril erbumine | Perindopril erbumine 1mg/ 5ml oral suspension                             |
| 75021 | 16213911000001100  | Perindopril erbumine | Perindopril erbumine 4mg tablets (Ranbaxy (UK) Ltd)                       |
| 75024 | 17955711000001106  | Perindopril erbumine | Perindopril erbumine 4mg tablets (Phoenix Healthcare Distribution Ltd)    |
| 75847 |                    | Perindopril erbumine | Perindopril erbumine 8mg/ 5ml oral solution                               |
| 77665 |                    | Perindopril erbumine | Perindopril erbumine 8mg tablets (Somex Pharma)                           |
| 37930 | 13454411000001108  | Perindopril arginine | Perindopril arginine 5mg tablets                                          |
| 37964 | 13454211000001109  | Perindopril arginine | Perindopril arginine 2.5mg tablets                                        |
| 37965 | 13444911000001103  | Perindopril arginine | Coversyl Arginine 5mg tablets (Servier Laboratories Ltd)                  |
| 37971 | 13454111000001103  | Perindopril arginine | Perindopril arginine 10mg tablets                                         |
| 38026 | 13444611000001109  | Perindopril arginine | Coversyl Arginine 10mg tablets (Servier Laboratories Ltd)                 |
| 38034 | 13445211000001108  | Perindopril arginine | Coversyl Arginine 2.5mg tablets (Servier Laboratories Ltd)                |
| 50347 | 15416811000001102  | Perindopril arginine | Coversyl Arginine 5mg tablets (Waymade Healthcare Plc)                    |
| 51807 | 19720911000001102  | Perindopril arginine | Coversyl Arginine 5mg tablets (DE Pharmaceuticals)                        |
| 15121 | 318934008          | Moexipril            | Moexipril 7.5mg tablets                                                   |
| 17120 | 318935009          | Moexipril            | Moexipril 15mg tablets                                                    |

|       |                   |            |                                                                 |
|-------|-------------------|------------|-----------------------------------------------------------------|
| 28724 | 4041111000001109  | Moexipril  | Perdix 7.5mg tablets (UCB Pharma Ltd)                           |
| 28725 | 4040311000001101  | Moexipril  | Perdix 15mg tablets (UCB Pharma Ltd)                            |
| 65    | 318859000         | Lisinopril | Lisinopril 10mg tablets                                         |
| 69    | 318860005         | Lisinopril | Lisinopril 20mg tablets                                         |
| 78    | 318858008         | Lisinopril | Lisinopril 5mg tablets                                          |
| 277   | 318857003         | Lisinopril | Lisinopril 2.5mg tablets                                        |
| 3720  | 593111000001108   | Lisinopril | Zestril 2.5mg tablets (AstraZeneca UK Ltd)                      |
| 6806  | 825311000001100   | Lisinopril | Zestril 10mg tablets (AstraZeneca UK Ltd)                       |
| 6807  | 823211000001109   | Lisinopril | Zestril 5mg tablets (AstraZeneca UK Ltd)                        |
| 8268  | 891711000001107   | Lisinopril | Zestril 20mg tablets (AstraZeneca UK Ltd)                       |
| 10882 | 321011000001103   | Lisinopril | Carace 2.5mg tablets (Bristol-Myers Squibb Pharmaceuticals Ltd) |
| 11987 | 8622511000001100  | Lisinopril | Lisinopril 5mg/ 5ml oral solution                               |
| 12313 | 56711000001109    | Lisinopril | Carace 20mg tablets (Bristol-Myers Squibb Pharmaceuticals Ltd)  |
| 14387 | 778011000001109   | Lisinopril | Carace 5mg tablets (Bristol-Myers Squibb Pharmaceuticals Ltd)   |
| 16701 | 315211000001104   | Lisinopril | Carace 10mg tablets (Bristol-Myers Squibb Pharmaceuticals Ltd)  |
| 19198 | 487411000001102   | Lisinopril | Lisinopril 20mg tablets (Teva UK Ltd)                           |
| 19204 | 528611000001100   | Lisinopril | Lisinopril 5mg tablets (Teva UK Ltd)                            |
| 19223 | 640511000001107   | Lisinopril | Lisinopril 10mg tablets (Teva UK Ltd)                           |
| 20975 | 8622911000001107  | Lisinopril | Lisinopril 7.5mg/ 5ml oral suspension                           |
| 30921 | 60211000001105    | Lisinopril | Lisinopril 2.5mg tablets (Teva UK Ltd)                          |
| 32597 | 145811000001100   | Lisinopril | Lisinopril 10mg tablets (Sandoz Ltd)                            |
| 33977 | 656411000001108   | Lisinopril | Lisinopril 10mg tablets (Mylan)                                 |
| 34471 | 35611000001109    | Lisinopril | Lisinopril 5mg tablets (Mylan)                                  |
| 34696 | 576511000001101   | Lisinopril | Lisinopril 20mg tablets (Mylan)                                 |
| 34799 | 360711000001100   | Lisinopril | Lisinopril 20mg tablets (Zentiva)                               |
| 37778 | 8622611000001101  | Lisinopril | Lisinopril 5mg/ 5ml oral suspension                             |
| 41522 | 7315011000001107  | Lisinopril | Lisopress 20mg tablets (Teva UK Ltd)                            |
| 41532 | 7314511000001100  | Lisinopril | Lisopress 5mg tablets (Teva UK Ltd)                             |
| 41538 | 7314011000001108  | Lisinopril | Lisopress 2.5mg tablets (Teva UK Ltd)                           |
| 41573 | 7314811000001102  | Lisinopril | Lisopress 10mg tablets (Teva UK Ltd)                            |
| 43412 | 874311000001100   | Lisinopril | Lisinopril 2.5mg tablets (A A H Pharmaceuticals Ltd)            |
| 43413 | 668811000001102   | Lisinopril | Lisinopril 20mg tablets (A A H Pharmaceuticals Ltd)             |
| 43416 | 532711000001109   | Lisinopril | Lisinopril 10mg tablets (A A H Pharmaceuticals Ltd)             |
| 43418 | 18111000001103    | Lisinopril | Lisinopril 5mg tablets (A A H Pharmaceuticals Ltd)              |
| 43566 | 877611000001104   | Lisinopril | Lisinopril 2.5mg tablets (Sandoz Ltd)                           |
| 45300 | 247511000001109   | Lisinopril | Lisinopril 10mg tablets (Actavis UK Ltd)                        |
| 45324 | 460111000001109   | Lisinopril | Lisinopril 20mg tablets (Actavis UK Ltd)                        |
| 45337 | 34511000001109    | Lisinopril | Lisinopril 5mg tablets (Actavis UK Ltd)                         |
| 45816 | 9810211000001103  | Lisinopril | Lisinopril 5mg tablets (Almus Pharmaceuticals Ltd)              |
| 46975 | 683211000001108   | Lisinopril | Lisinopril 5mg tablets (Sandoz Ltd)                             |
| 46979 | 637111000001101   | Lisinopril | Lisinopril 20mg tablets (Sandoz Ltd)                            |
| 47159 | 9810411000001104  | Lisinopril | Lisinopril 10mg tablets (Almus Pharmaceuticals Ltd)             |
| 51433 | 13754411000001103 | Lisinopril | Lisinopril 20mg tablets (Tillomed Laboratories Ltd)             |

|       |                    |            |                                                                   |
|-------|--------------------|------------|-------------------------------------------------------------------|
| 52088 | 17937211000001108  | Lisinopril | Lisinopril 5mg tablets (Phoenix Healthcare Distribution Ltd)      |
| 53271 | 912911000001107    | Lisinopril | Lisinopril 10mg tablets (Alliance Healthcare (Distribution) Ltd)  |
| 53551 | 17937611000001105  | Lisinopril | Lisinopril 20mg tablets (Phoenix Healthcare Distribution Ltd)     |
| 53820 | 10386011000001109  | Lisinopril | Lisinopril 5mg tablets (Arrow Generics Ltd)                       |
| 54037 | 10290011000001104  | Lisinopril | Lisinopril 10mg tablets (Relonchem Ltd)                           |
| 54283 | 8594211000001106   | Lisinopril | Lisinopril 5mg/ 5ml oral suspension (Special Order)               |
| 54288 | 10386411000001100  | Lisinopril | Lisinopril 10mg tablets (Arrow Generics Ltd)                      |
| 54512 | 243735001000027100 | Lisinopril | Lisinopril Oral solution                                          |
| 54928 | 16060611000001106  | Lisinopril | Lisinopril 10mg tablets (Bristol Laboratories Ltd)                |
| 55002 | 18463211000001101  | Lisinopril | Lisinopril 20mg tablets (Accord Healthcare Ltd)                   |
| 55456 | 72111000001106     | Lisinopril | Lisinopril 5mg tablets (Alliance Healthcare (Distribution) Ltd)   |
| 55588 | 15107811000001101  | Lisinopril | Lisinopril 20mg tablets (Sigma Pharmaceuticals Plc)               |
| 55639 | 18463011000001106  | Lisinopril | Lisinopril 10mg tablets (Accord Healthcare Ltd)                   |
| 55896 | 460011000001108    | Lisinopril | Lisinopril 2.5mg tablets (Actavis UK Ltd)                         |
| 56279 | 8622111000001109   | Lisinopril | Lisinopril 2.5mg/ 5ml oral solution                               |
| 56505 | 16450011000001100  | Lisinopril | Zestril 5mg tablets (Lexon (UK) Ltd)                              |
| 56510 | 14767811000001102  | Lisinopril | Zestril 20mg tablets (Sigma Pharmaceuticals Plc)                  |
| 57048 | 499711000001101    | Lisinopril | Lisinopril 10mg tablets (Zentiva)                                 |
| 57588 | 17480011000001107  | Lisinopril | Zestril 2.5mg tablets (Mawdsley-Brooks & Company Ltd)             |
| 58258 | 8622211000001103   | Lisinopril | Lisinopril 2.5mg/ 5ml oral suspension                             |
| 58294 | 18463411000001102  | Lisinopril | Lisinopril 5mg tablets (Accord Healthcare Ltd)                    |
| 58451 | 9809811000001108   | Lisinopril | Lisinopril 2.5mg tablets (Almus Pharmaceuticals Ltd)              |
| 58461 | 709811000001102    | Lisinopril | Lisinopril 2.5mg tablets (Kent Pharmaceuticals Ltd)               |
| 58682 | 5253711000001106   | Lisinopril | Lisinopril 2.5mg tablets (Mylan)                                  |
| 58863 | 17937411000001107  | Lisinopril | Lisinopril 10mg tablets (Phoenix Healthcare Distribution Ltd)     |
| 58871 | 22072611000001100  | Lisinopril | Lisinopril 10mg tablets (Waymade Healthcare Plc)                  |
| 59109 | 13754011000001107  | Lisinopril | Lisinopril 5mg tablets (Tillomed Laboratories Ltd)                |
| 59111 | 580411000001107    | Lisinopril | Lisinopril 20mg tablets (Alliance Healthcare (Distribution) Ltd)  |
| 60010 | 832711000001108    | Lisinopril | Lisinopril 10mg tablets (Kent Pharmaceuticals Ltd)                |
| 60097 | 461611000001106    | Lisinopril | Lisinopril 2.5mg tablets (Zentiva)                                |
| 60232 | 574111000001103    | Lisinopril | Lisinopril 5mg tablets (Zentiva)                                  |
| 60309 | 10291711000001105  | Lisinopril | Lisinopril 5mg tablets (Relonchem Ltd)                            |
| 61262 | 16060811000001105  | Lisinopril | Lisinopril 20mg tablets (Bristol Laboratories Ltd)                |
| 62564 | 8621911000001101   | Lisinopril | Lisinopril 10mg/ 5ml oral solution                                |
| 63030 | 24367411000001102  | Lisinopril | Lisinopril 10mg tablets (DE Pharmaceuticals)                      |
| 63559 | 607011000001108    | Lisinopril | Lisinopril 20mg tablets (Kent Pharmaceuticals Ltd)                |
| 63824 | 8622011000001108   | Lisinopril | Lisinopril 10mg/ 5ml oral suspension                              |
| 64902 | 30251811000001106  | Lisinopril | Lisinopril 5mg/ 5ml oral solution sugar free                      |
| 65102 | 15107411000001103  | Lisinopril | Lisinopril 10mg tablets (Sigma Pharmaceuticals Plc)               |
| 65416 | 27377411000001101  | Lisinopril | Lisinopril 5mg tablets (Lupin Healthcare (UK) Ltd)                |
| 65536 | 337211000001101    | Lisinopril | Lisinopril 2.5mg tablets (Alliance Healthcare (Distribution) Ltd) |
| 65983 | 27377211000001100  | Lisinopril | Lisinopril 2.5mg tablets (Lupin Healthcare (UK) Ltd)              |
| 65985 | 24368011000001107  | Lisinopril | Lisinopril 2.5mg tablets (DE Pharmaceuticals)                     |

|       |                    |                   |                                                                |
|-------|--------------------|-------------------|----------------------------------------------------------------|
| 66558 | 24368811000001101  | Lisinopril        | Lisinopril 5mg tablets (DE Pharmaceuticals)                    |
| 66622 | 24368611000001100  | Lisinopril        | Lisinopril 20mg tablets (DE Pharmaceuticals)                   |
| 66772 | 22072211000001102  | Lisinopril        | Lisinopril 2.5mg tablets (Waymade Healthcare Plc)              |
| 67075 | 30221411000001105  | Lisinopril        | Lisinopril 2.5mg tablets (Mawdsley-Brooks & Company Ltd)       |
| 67194 | 16060211000001109  | Lisinopril        | Lisinopril 2.5mg tablets (Bristol Laboratories Ltd)            |
| 67795 | 9810811000001102   | Lisinopril        | Lisinopril 20mg tablets (Almus Pharmaceuticals Ltd)            |
| 68094 | 15108011000001108  | Lisinopril        | Lisinopril 5mg tablets (Sigma Pharmaceuticals Plc)             |
| 68247 | 16060411000001108  | Lisinopril        | Lisinopril 5mg tablets (Bristol Laboratories Ltd)              |
| 69074 | 10291011000001108  | Lisinopril        | Lisinopril 20mg tablets (Relonchem Ltd)                        |
| 69269 | 22072811000001101  | Lisinopril        | Lisinopril 20mg tablets (Waymade Healthcare Plc)               |
| 70667 | 30221611000001108  | Lisinopril        | Lisinopril 5mg tablets (Mawdsley-Brooks & Company Ltd)         |
| 71562 | 129245001000027105 | Lisinopril        | Lisinopril 10mg Tablet (Niche Generics Ltd)                    |
| 72038 | 10290411000001108  | Lisinopril        | Lisinopril 2.5mg tablets (Relonchem Ltd)                       |
| 72336 | 22072411000001103  | Lisinopril        | Lisinopril 5mg tablets (Waymade Healthcare Plc)                |
| 73672 | 35165411000001106  | Lisinopril        | Lisinopril 10mg tablets (Aurobindo Pharma Ltd)                 |
| 73716 | 35391311000001107  | Lisinopril        | Lisinopril 2.5mg tablets (Crescent Pharma Ltd)                 |
| 74155 | 35165211000001107  | Lisinopril        | Lisinopril 5mg tablets (Aurobindo Pharma Ltd)                  |
| 76100 |                    | Lisinopril        | Lisinopril 5mg tablets (Kent Pharmaceuticals Ltd)              |
| 76128 |                    | Lisinopril        | Lisinopril 20mg tablets (Lupin Healthcare (UK) Ltd)            |
| 77378 |                    | Lisinopril        | Zestril 10mg tablets (Dowelhurst Ltd)                          |
| 77401 |                    | Lisinopril        | Zestril 2.5mg tablets (Waymade Healthcare Plc)                 |
| 77402 |                    | Lisinopril        | Zestril 5mg tablets (Dowelhurst Ltd)                           |
| 77407 |                    | Lisinopril        | Zestril 5mg tablets (Waymade Healthcare Plc)                   |
| 6408  | 797911000001103    | Imidapril         | Tanatril 5mg tablets (Mitsubishi Tanabe Pharma Europe Ltd)     |
| 12815 | 680811000001102    | Imidapril         | Tanatril 10mg tablets (Mitsubishi Tanabe Pharma Europe Ltd)    |
| 12858 | 318944005          | Imidapril         | Imidapril 10mg tablets                                         |
| 16924 | 318943004          | Imidapril         | Imidapril 5mg tablets                                          |
| 18219 | 318942009          | Imidapril         | Imidapril 20mg tablets                                         |
| 32560 | 533511000001106    | Imidapril         | Tanatril 20mg tablets (Mitsubishi Tanabe Pharma Europe Ltd)    |
| 633   | 318909008          | Fosinopril sodium | Fosinopril 10mg tablets                                        |
| 4571  | 462511000001104    | Fosinopril sodium | Staril 10mg tablets (Bristol-Myers Squibb Pharmaceuticals Ltd) |
| 5861  | 318910003          | Fosinopril sodium | Fosinopril 20mg tablets                                        |
| 13589 | 348111000001107    | Fosinopril sodium | Staril 20mg tablets (Bristol-Myers Squibb Pharmaceuticals Ltd) |
| 67307 | 5543711000001104   | Fosinopril sodium | Staril 20mg tablets (Dowelhurst Ltd)                           |
| 196   | 318851002          | Enalapril maleate | Enalapril 5mg tablets                                          |
| 448   | 318850001          | Enalapril maleate | Enalapril 2.5mg tablets                                        |
| 1299  | 318853004          | Enalapril maleate | Enalapril 10mg tablets                                         |
| 1904  | 318855006          | Enalapril maleate | Enalapril 20mg tablets                                         |
| 8105  | 302311000001104    | Enalapril maleate | Innovace 20mg tablets (Merck Sharp & Dohme Ltd)                |
| 8106  | 749611000001107    | Enalapril maleate | Innovace 2.5mg tablets (Merck Sharp & Dohme Ltd)               |
| 8800  | 730211000001104    | Enalapril maleate | Innovace 5mg tablets (Merck Sharp & Dohme Ltd)                 |
| 8830  | 316111000001104    | Enalapril maleate | Innovace 10mg tablets (Merck Sharp & Dohme Ltd)                |
| 11197 | 233035001000027101 | Enalapril Maleate | Innovace melt 5mg Wafer (Merck Sharp & Dohme Ltd)              |



|       |                    |                   |                                                       |
|-------|--------------------|-------------------|-------------------------------------------------------|
| 13755 | 206205001000027109 | Enalapril Maleate | Enalapril 10mg wafer                                  |
| 15085 | 82345001000027107  | Enalapril Maleate | Innovace Titration pack (Merck Sharp & Dohme Ltd)     |
| 16708 | 98645001000027107  | Enalapril Maleate | Enalapril titration pack                              |
| 19208 | 676011000001102    | Enalapril maleate | Enalapril 10mg tablets (Actavis UK Ltd)               |
| 20188 | 98655001000027105  | Enalapril Maleate | Enalapril 2.5mg wafer                                 |
| 22439 | 222975001000027100 | Enalapril maleate | Ednyt 20mg Tablet (Dominion Pharma)                   |
| 22708 | 206195001000027109 | Enalapril Maleate | Enalapril 5mg wafer                                   |
| 23252 | 761411000001101    | Enalapril maleate | Pralenal 10 tablets (Opus Pharmaceuticals Ltd)        |
| 24041 | 206215001000027106 | Enalapril Maleate | Enalapril 20mg wafer                                  |
| 27871 | 233045001000027100 | Enalapril Maleate | Innovace melt 10mg Wafer (Merck Sharp & Dohme Ltd)    |
| 28127 | 795111000001105    | Enalapril maleate | Enalapril 2.5mg tablets (Teva UK Ltd)                 |
| 29530 | 233025001000027103 | Enalapril Maleate | Innovace melt 2.5mg Wafer (Merck Sharp & Dohme Ltd)   |
| 31587 | 233005001000027105 | Enalapril Maleate | Innovace melt 20mg Wafer (Merck Sharp & Dohme Ltd)    |
| 31716 | 665211000001105    | Enalapril maleate | Enalapril 20mg tablets (Actavis UK Ltd)               |
| 32241 | 225811000001104    | Enalapril maleate | Enalapril 10mg tablets (A A H Pharmaceuticals Ltd)    |
| 33057 | 195715001000027106 | Enalapril maleate | Ednyt 5mg Tablet (Dominion Pharma)                    |
| 33078 | 526511000001100    | Enalapril maleate | Enalapril 20mg tablets (A A H Pharmaceuticals Ltd)    |
| 34400 | 61665001000027109  | Enalapril maleate | Enalapril 5mg Tablet (Dowelhurst Ltd)                 |
| 34453 | 923711000001107    | Enalapril maleate | Enalapril 20mg tablets (Mylan)                        |
| 34712 | 233511000001103    | Enalapril maleate | Enalapril 20mg tablets (Kent Pharmaceuticals Ltd)     |
| 34768 | 381411000001100    | Enalapril maleate | Enalapril 20mg tablets (IVAX Pharmaceuticals UK Ltd)  |
| 34798 | 728411000001104    | Enalapril maleate | Enalapril 20mg tablets (Sandoz Ltd)                   |
| 34952 | 401711000001103    | Enalapril maleate | Enalapril 10mg tablets (Mylan)                        |
| 34953 | 346311000001105    | Enalapril maleate | Enalapril 20mg tablets (Zentiva)                      |
| 35794 | 26111000001109     | Enalapril maleate | Enalapril 5mg tablets (A A H Pharmaceuticals Ltd)     |
| 36753 | 195725001000027102 | Enalapril maleate | Ednyt 10mg Tablet (Dominion Pharma)                   |
| 37080 | 8486911000001103   | Enalapril maleate | Enalapril 5mg/ 5ml oral solution                      |
| 37087 | 8487011000001104   | Enalapril maleate | Enalapril 5mg/ 5ml oral suspension                    |
| 41417 | 4811000001104      | Enalapril maleate | Enalapril 2.5mg tablets (A A H Pharmaceuticals Ltd)   |
| 41694 | 456011000001101    | Enalapril maleate | Enalapril 2.5mg tablets (IVAX Pharmaceuticals UK Ltd) |
| 41746 | 450811000001105    | Enalapril maleate | Enalapril 10mg tablets (Sandoz Ltd)                   |
| 42723 | 578511000001100    | Enalapril maleate | Pralenal 5 tablets (Opus Pharmaceuticals Ltd)         |
| 42894 | 115211000001105    | Enalapril maleate | Enalapril 10mg tablets (Teva UK Ltd)                  |
| 42901 | 319411000001102    | Enalapril maleate | Enalapril 5mg tablets (Teva UK Ltd)                   |
| 42902 | 695511000001106    | Enalapril maleate | Enalapril 20mg tablets (Teva UK Ltd)                  |
| 42908 | 856011000001106    | Enalapril maleate | Enalapril 5mg tablets (IVAX Pharmaceuticals UK Ltd)   |
| 43411 | 51511000001108     | Enalapril maleate | Enalapril 5mg tablets (Sandoz Ltd)                    |
| 43563 | 102611000001100    | Enalapril maleate | Enalapril 2.5mg tablets (Zentiva)                     |
| 44657 | 195705001000027109 | Enalapril maleate | Ednyt 2.5mg Tablet (Dominion Pharma)                  |
| 45217 | 50211000001104     | Enalapril maleate | Enalapril 5mg tablets (Kent Pharmaceuticals Ltd)      |
| 46974 | 766411000001107    | Enalapril maleate | Enalapril 5mg tablets (Mylan)                         |
| 50334 | 8486811000001108   | Enalapril maleate | Enalapril 4mg/ 5ml oral suspension                    |
| 50780 | 12086111000001102  | Enalapril maleate | Enalapril 2mg/ 5ml oral solution                      |

|       |                   |                        |                                                                 |
|-------|-------------------|------------------------|-----------------------------------------------------------------|
| 50863 | 8463911000001106  | Enalapril maleate      | Enalapril 5mg/ 5ml oral solution (Drug Tariff Special Order)    |
| 52010 | 688811000001104   | Enalapril maleate      | Enalapril 10mg tablets (Alliance Healthcare (Distribution) Ltd) |
| 52882 | 20092911000001108 | Enalapril maleate      | Enalapril 5mg/ 5ml oral suspension sugar free                   |
| 53719 | 367611000001108   | Enalapril maleate      | Enalapril 20mg tablets (Alliance Healthcare (Distribution) Ltd) |
| 53915 | 11553911000001104 | Enalapril maleate      | Enalapril 5mg tablets (Dexcel-Pharma Ltd)                       |
| 55903 | 11554111000001100 | Enalapril maleate      | Enalapril 10mg tablets (Dexcel-Pharma Ltd)                      |
| 57378 | 12086211000001108 | Enalapril maleate      | Enalapril 2mg/ 5ml oral suspension                              |
| 57882 | 8489611000001101  | Enalapril maleate      | Enalapril 2.5mg/ 5ml oral suspension                            |
| 58751 | 8485611000001104  | Enalapril maleate      | Enalapril 1.25mg/ 5ml oral suspension                           |
| 59996 | 19191211000001101 | Enalapril maleate      | Enalapril 20mg tablets (Milpharm Ltd)                           |
| 60143 | 19727011000001100 | Enalapril maleate      | Enalapril 5mg tablets (Medreich Plc)                            |
| 61133 | 17901611000001106 | Enalapril maleate      | Enalapril 10mg tablets (Phoenix Healthcare Distribution Ltd)    |
| 62860 | 23881911000001104 | Enalapril maleate      | Enalapril 5mg tablets (DE Pharmaceuticals)                      |
| 63322 | 9794411000001107  | Enalapril maleate      | Enalapril 10mg tablets (Almus Pharmaceuticals Ltd)              |
| 64062 | 12085811000001101 | Enalapril maleate      | Enalapril 1mg/ 5ml oral suspension                              |
| 64877 | 11553711000001101 | Enalapril maleate      | Enalapril 2.5mg tablets (Dexcel-Pharma Ltd)                     |
| 66895 | 8485811000001100  | Enalapril maleate      | Enalapril 10mg/ 5ml oral suspension                             |
| 68496 | 127311000001103   | Enalapril maleate      | Enalapril 10mg tablets (Kent Pharmaceuticals Ltd)               |
| 71668 | 9794611000001105  | Enalapril maleate      | Enalapril 20mg tablets (Almus Pharmaceuticals Ltd)              |
| 71737 | 9793911000001101  | Enalapril maleate      | Enalapril 2.5mg tablets (Almus Pharmaceuticals Ltd)             |
| 72017 | 8485511000001103  | Enalapril maleate      | Enalapril 1.25mg/ 5ml oral solution                             |
| 73389 | 23881711000001101 | Enalapril maleate      | Enalapril 2.5mg tablets (DE Pharmaceuticals)                    |
| 73617 | 12085411000001103 | Enalapril maleate      | Enalapril 1.5mg/ 5ml oral suspension                            |
| 74237 | 12085911000001106 | Enalapril maleate      | Enalapril 25mg/ 5ml oral solution                               |
| 76486 |                   | Enalapril maleate      | Enalapril 2.5mg tablets (Mylan)                                 |
| 76619 |                   | Enalapril maleate      | Enalapril 20mg tablets (Dexcel-Pharma Ltd)                      |
| 77271 |                   | Enalapril maleate      | Enalapril 20mg Tablet (Neo Laboratories Ltd)                    |
| 77315 |                   | Enalapril maleate      | Enalapril 2.5mg/ 5ml oral solution                              |
| 77316 |                   | Enalapril maleate      | Enalapril 4mg/ 5ml oral solution                                |
| 77345 |                   | Enalapril maleate      | Innovace 10mg tablets (Dowelhurst Ltd)                          |
| 77690 |                   | Enalapril maleate      | Enalapril 10mg tablets (IVAX Pharmaceuticals UK Ltd)            |
| 77831 |                   | Enalapril maleate      | Enalapril 500micrograms/ 5ml oral solution                      |
| 12411 | 318915008         | Cilazapril monohydrate | Cilazapril 500microgram tablets                                 |
| 12412 | 318917000         | Cilazapril monohydrate | Cilazapril 2.5mg tablets                                        |
| 12574 | 318916009         | Cilazapril monohydrate | Cilazapril 1mg tablets                                          |
| 13026 | 318923005         | Cilazapril monohydrate | Cilazapril 5mg tablets                                          |
| 16196 | 3671311000001104  | Cilazapril monohydrate | Vascace 5mg tablets (Roche Products Ltd)                        |
| 16197 | 3672411000001101  | Cilazapril monohydrate | Vascace 2.5mg tablets (Roche Products Ltd)                      |
| 16212 | 3669711000001105  | Cilazapril monohydrate | Vascace 1mg tablets (Roche Products Ltd)                        |
| 21053 | 3740211000001108  | Cilazapril monohydrate | Vascace 500microgram tablets (Roche Products Ltd)               |
| 15605 | 11055001000027102 | Cilazapril             | Cilazapril 250micrograms tablets                                |
| 23642 | 20325001000027107 | Cilazapril             | Vascace 0.25mg Tablet (Roche Products Ltd)                      |
| 1121  | 318820009         | Captopril              | Captopril 12.5mg tablets                                        |

|       |                    |           |                                                                   |
|-------|--------------------|-----------|-------------------------------------------------------------------|
| 1143  | 318821008          | Captopril | Captopril 25mg tablets                                            |
| 1144  | 455611000001103    | Captopril | Capoten 25mg tablets (Bristol-Myers Squibb Pharmaceuticals Ltd)   |
| 1807  | 318824000          | Captopril | Captopril 50mg tablets                                            |
| 3069  | 517711000001103    | Captopril | Acepril 25mg tablets (Bristol-Myers Squibb Pharmaceuticals Ltd)   |
| 3310  | 134511000001103    | Captopril | Capoten 12.5mg tablets (Bristol-Myers Squibb Pharmaceuticals Ltd) |
| 3839  | 386611000001109    | Captopril | Capoten 50mg tablets (Bristol-Myers Squibb Pharmaceuticals Ltd)   |
| 15958 | 219545001000027103 | Captopril | Captopril 2mg tablets                                             |
| 17624 | 8351811000001102   | Captopril | Captopril 5mg/ 5ml oral suspension                                |
| 17633 | 236435001000027104 | Captopril | Captopril 3mg/ 5ml oral solution                                  |
| 18269 | 660111000001107    | Captopril | Acepril 12.5mg tablets (Bristol-Myers Squibb Pharmaceuticals Ltd) |
| 18325 | 814111000001108    | Captopril | Acepril 50mg tablets (Bristol-Myers Squibb Pharmaceuticals Ltd)   |
| 20849 | 673711000001107    | Captopril | Tensopril 12.5mg tablets (Teva UK Ltd)                            |
| 21943 | 777711000001105    | Captopril | Kaplon 12.5mg tablets (Teva UK Ltd)                               |
| 23478 | 653111000001108    | Captopril | Tensopril 50mg tablets (Teva UK Ltd)                              |
| 24482 | 760211000001106    | Captopril | Captomex 50mg tablets (Actavis UK Ltd)                            |
| 25998 | 372511000001104    | Captopril | Captomex 12.5mg tablets (Actavis UK Ltd)                          |
| 26995 | 477111000001100    | Captopril | Kaplon 25mg tablets (Teva UK Ltd)                                 |
| 28486 | 8352011000001100   | Captopril | Captopril 6.25mg/ 5ml oral suspension                             |
| 28820 | 562011000001101    | Captopril | Captomex 25mg tablets (Actavis UK Ltd)                            |
| 30039 | 597511000001109    | Captopril | Tensopril 25mg tablets (Teva UK Ltd)                              |
| 32048 | 572511000001102    | Captopril | Kaplon 50mg tablets (Teva UK Ltd)                                 |
| 32514 | 817411000001108    | Captopril | Ecopace 25mg tablets (AMCo)                                       |
| 33336 | 160135001000027103 | Captopril | Captopril 5mg/ 5ml Oral suspension (Eldon Laboratories)           |
| 33646 | 68395001000027109  | Captopril | Captopril 12.5mg Tablet (Generics (UK) Ltd)                       |
| 34544 | 68435001000027105  | Captopril | Captopril 12.5mg Tablet (IVAX Pharmaceuticals UK Ltd)             |
| 34562 | 68445001000027106  | Captopril | Captopril 25mg Tablet (IVAX Pharmaceuticals UK Ltd)               |
| 34719 | 68415001000027104  | Captopril | Captopril 50mg Tablet (Generics (UK) Ltd)                         |
| 34936 | 68705001000027105  | Captopril | Captopril 25mg Tablet (Lagap)                                     |
| 34937 | 68455001000027109  | Captopril | Captopril 50mg Tablet (IVAX Pharmaceuticals UK Ltd)               |
| 35302 | 8347211000001105   | Captopril | Captopril 12.5mg/ 5ml oral suspension                             |
| 36742 | 248405001000027101 | Captopril | Captopril 2mg/ 5ml oral suspension                                |
| 37655 | 424411000001101    | Captopril | Captopril 25mg tablets (Teva UK Ltd)                              |
| 39512 | 256275001000027106 | Captopril | Captopril 25mg/ 5ml oral suspension                               |
| 41617 | 501411000001104    | Captopril | Captopril 25mg tablets (Actavis UK Ltd)                           |
| 41633 | 605411000001105    | Captopril | Captopril 12.5mg tablets (Actavis UK Ltd)                         |
| 41743 | 3911000001107      | Captopril | Captopril 50mg tablets (Teva UK Ltd)                              |
| 43432 | 245485001000027106 | Captopril | Captopril 6.25mg tablets                                          |
| 43507 | 68405001000027101  | Captopril | Captopril 25mg Tablet (Generics (UK) Ltd)                         |
| 43649 | 303411000001102    | Captopril | Captopril 25mg tablets (A A H Pharmaceuticals Ltd)                |
| 44527 | 7659911000001107   | Captopril | Captopril 5mg/ ml oral solution sugar free                        |
| 45228 | 243265001000027100 | Captopril | Captopril capsules                                                |
| 46851 | 8351611000001101   | Captopril | Captopril 5mg/ 5ml oral solution                                  |
| 46951 | 226411000001105    | Captopril | Captopril 12.5mg tablets (A A H Pharmaceuticals Ltd)              |

|       |                    |           |                                                                 |
|-------|--------------------|-----------|-----------------------------------------------------------------|
| 46957 | 13741311000001109  | Captopril | Captopril 12.5mg tablets (Tillomed Laboratories Ltd)            |
| 52293 | 8791811000001109   | Captopril | Captopril 2mg capsules                                          |
| 52499 | 8348511000001107   | Captopril | Captopril 25mg/ 5ml oral solution                               |
| 54544 | 8348611000001106   | Captopril | Captopril 25mg/ 5ml oral suspension                             |
| 56509 | 5528711000001108   | Captopril | Capoten 12.5mg tablets (Dowelhurst Ltd)                         |
| 56850 | 221411000001104    | Captopril | Ecopace 12.5mg tablets (AMCo)                                   |
| 58195 | 8347111000001104   | Captopril | Captopril 12.5mg/ 5ml oral solution                             |
| 59699 | 23707511000001102  | Captopril | Captopril 5mg/ 5ml oral solution sugar free                     |
| 59915 | 23707311000001108  | Captopril | Captopril 25mg/ 5ml oral solution sugar free                    |
| 60349 | 23681711000001107  | Captopril | Noyada 25mg/ 5ml oral solution (Martindale Pharmaceuticals Ltd) |
| 60823 | 23682011000001102  | Captopril | Noyada 5mg/ 5ml oral solution (Martindale Pharmaceuticals Ltd)  |
| 64739 | 8317011000001108   | Captopril | Captopril 25mg/ 5ml oral solution (Special Order)               |
| 66597 | 8346811000001109   | Captopril | Captopril 10mg/ 5ml oral suspension                             |
| 69192 | 243255001000027109 | Captopril | Captopril oral solution                                         |
| 69599 | 8351111000001109   | Captopril | Captopril 500micrograms/ 5ml oral suspension                    |
| 69600 | 8347911000001101   | Captopril | Captopril 1mg/ 5ml oral suspension                              |
| 70994 | 654711000001106    | Captopril | Captopril 12.5mg tablets (Sandoz Ltd)                           |
| 71277 | 8353911000001108   | Captopril | Captopril 7.5mg/ 5ml oral suspension                            |
| 73659 | 291911000001104    | Captopril | Captopril 50mg tablets (Kent Pharmaceuticals Ltd)               |
| 74417 | 8348311000001101   | Captopril | Captopril 20mg/ 5ml oral suspension                             |
| 74627 | 68765001000027106  | Captopril | Captopril 25mg Tablet (C P Pharmaceuticals Ltd)                 |
| 76433 |                    | Captopril | Captopril 1.5mg capsules                                        |
| 77046 |                    | Captopril | Captopril 3mg oral powder sachets                               |
| 77361 |                    | Captopril | Capoten 25mg tablets (Waymade Healthcare Plc)                   |
| 77364 |                    | Captopril | Capoten 25mg tablets (Stephar (U.K.) Ltd)                       |
| 77400 |                    | Captopril | Capoten 25mg tablets (Mawdsley-Brooks & Company Ltd)            |
| 77410 |                    | Captopril | Capoten 50mg tablets (Dowelhurst Ltd)                           |
| 77415 |                    | Captopril | Capoten 50mg tablets (Waymade Healthcare Plc)                   |
| 77597 |                    | Captopril | Captopril 50mg/ 5ml oral suspension                             |
| 217   | 118915001000027101 |           | CAPTOPRIL 4 MG/ ML LIQ                                          |
| 2927  | 98615001000027100  |           | PERINDOPRIL/ TERT-BUTYLAMINE 2 MG TAB                           |
| 3509  | 82805001000027100  |           | ENALAPRIL MALEATE 40 MG TAB                                     |
| 6200  | 3042211000001107   |           | Tritace titration pack capsules (Sanofi)                        |
| 8923  | 91075001000027109  |           | CAPTOPRIL 100 MG TAB                                            |
| 22004 |                    |           | CARACE (SPECIAL COMPLIANCE PACK)                                |
| 22882 |                    |           | RAMIPRIL                                                        |
| 23382 |                    |           | CARACE (SPECIAL COMPLIANCE PACK)                                |
| 24214 | 178845001000027106 |           | TRITACE 1.25 MG TAB                                             |
| 24693 |                    |           | CARACE (SPECIAL COMPLIANCE PACK)                                |
| 27890 |                    |           | ENALAPRIL MALEATE                                               |
| 29964 | 172005001000027105 |           | TRITACE 2.5 MG TAB                                              |
| 31288 |                    |           | TRITACE                                                         |
| 39421 | 13600911000001104  |           | Tritace titration pack tablets (Sanofi)                         |

|                                                                    |                    |                                           |                                                                                  |
|--------------------------------------------------------------------|--------------------|-------------------------------------------|----------------------------------------------------------------------------------|
| 63594                                                              | 13610111000001104  |                                           | Generic Tritace titration pack tablets                                           |
| <b>ACE-inhibitors in combination with calcium channel blockers</b> |                    |                                           |                                                                                  |
| 18223                                                              | 232125001000027103 | Verapamil / Trandolapril                  | Trandolapril with verapamil 2mg + 180mg Modified-release capsule                 |
| 19690                                                              | 36149211000001102  | Verapamil / Trandolapril                  | Verapamil 180mg modified-release / Trandolapril 2mg capsules                     |
| 20579                                                              | 3691211000001101   | Verapamil / Trandolapril                  | Tarka modified-release capsules (Abbott Laboratories Ltd)                        |
| 60684                                                              | 23984911000001108  | Perindopril erbumine/ Amlodipine besilate | Perindopril erbumine 4mg / Amlodipine 10mg tablets                               |
| 11567                                                              | 216655001000027100 | Felodipine/ Ramipril                      | Ramipril 5mg with felodipine 5mg modified-release tablet                         |
| 11965                                                              | 216645001000027103 | Felodipine/ Ramipril                      | Ramipril 2.5mg with felodipine 2.5mg modified-release tablet                     |
| 17006                                                              | 3887911000001109   | Felodipine/ Ramipril                      | Triapin 5mg/ 5mg modified-release tablets (Sanofi)                               |
| 17474                                                              | 318177008          | Felodipine/ Ramipril                      | Felodipine 5mg modified-release / Ramipril 5mg tablets                           |
| 21162                                                              | 318176004          | Felodipine/ Ramipril                      | Felodipine 2.5mg modified-release / Ramipril 2.5mg tablets                       |
| 28438                                                              | 4093211000001109   | Felodipine/ Ramipril                      | Triapin 2.5mg/ 2.5mg modified-release tablets (Sanofi)                           |
| 60067                                                              | 23985011000001108  | Amlodipine besilate/ Perindopril erbumine | Perindopril erbumine 4mg / Amlodipine 5mg tablets                                |
| 60744                                                              | 23985211000001103  | Amlodipine besilate/ Perindopril erbumine | Perindopril erbumine 8mg / Amlodipine 5mg tablets                                |
| 63149                                                              | 23985111000001109  | Amlodipine besilate/ Perindopril erbumine | Perindopril erbumine 8mg / Amlodipine 10mg tablets                               |
| <b>ACE- inhibitors in combination with diuretics</b>               |                    |                                           |                                                                                  |
| 6794                                                               | 3437611000001100   | Perindopril erbumine/ Indapamide          | Perindopril erbumine 4mg / Indapamide 1.25mg tablets                             |
| 14228                                                              | 562511000001109    | Perindopril erbumine/ Indapamide          | Coversyl Plus tablets (Servier Laboratories Ltd)                                 |
| 48098                                                              | 263725001000027105 | Perindopril Erbumine/ Indapamide          | Perindopril arginine 4mg with Indapamide 1.25mg tablet                           |
| 50607                                                              | 246725001000027107 | Perindopril Erbumine/ Indapamide          | Perindopril arginine 2mg with Indapamide 625 micrograms tablet                   |
| 37908                                                              | 13444311000001104  | Perindopril arginine/ Indapamide          | Coversyl Arginine Plus 5mg/ 1.25mg tablets (Servier Laboratories Ltd)            |
| 37978                                                              | 13454311000001101  | Perindopril arginine/ Indapamide          | Perindopril arginine 5mg / Indapamide 1.25mg tablets                             |
| 51258                                                              | 18571111000001108  | Perindopril arginine/ Indapamide          | Coversyl Arginine Plus 5mg/ 1.25mg tablets (DE Pharmaceuticals)                  |
| 2982                                                               | 27665001000027103  | Lisinopril/ Hydrochlorothiazide           | Zestoretic 20- 20mg+12.5mg Tablet (AstraZeneca UK Ltd)                           |
| 6359                                                               | 27675001000027105  | Lisinopril/ Hydrochlorothiazide           | Zestoretic 10- 10mg+12.5mg Tablet (AstraZeneca UK Ltd)                           |
| 6468                                                               | 318880006          | Lisinopril/ Hydrochlorothiazide           | Lisinopril 20mg / Hydrochlorothiazide 12.5mg tablets                             |
| 6786                                                               | 318884002          | Lisinopril/ Hydrochlorothiazide           | Lisinopril 10mg / Hydrochlorothiazide 12.5mg tablets                             |
| 9764                                                               | 178295001000027105 | Lisinopril/ Hydrochlorothiazide           | Carace 20 Tablet (Bristol-Myers Squibb Pharmaceuticals Ltd)                      |
| 17655                                                              | 178305001000027103 | Lisinopril/ Hydrochlorothiazide           | Carace 10 Tablet (Bristol-Myers Squibb Pharmaceuticals Ltd)                      |
| 21231                                                              | 7385711000001106   | Lisinopril/ Hydrochlorothiazide           | Caralpha 20mg/ 12.5mg tablets (Actavis UK Ltd)                                   |
| 33353                                                              | 7334911000001102   | Lisinopril/ Hydrochlorothiazide           | Lisinopril 20mg / Hydrochlorothiazide 12.5mg tablets (Teva UK Ltd)               |
| 37710                                                              | 7334711000001104   | Lisinopril/ Hydrochlorothiazide           | Lisinopril 10mg / Hydrochlorothiazide 12.5mg tablets (Teva UK Ltd)               |
| 38995                                                              | 3143111000001100   | Lisinopril/ Hydrochlorothiazide           | Zestoretic 20 tablets (AstraZeneca UK Ltd)                                       |
| 39137                                                              | 3144311000001101   | Lisinopril/ Hydrochlorothiazide           | Zestoretic 10 tablets (AstraZeneca UK Ltd)                                       |
| 39147                                                              | 3143511000001109   | Lisinopril/ Hydrochlorothiazide           | Carace 20 Plus tablets (Merck Sharp & Dohme Ltd)                                 |
| 39242                                                              | 3144511000001107   | Lisinopril/ Hydrochlorothiazide           | Carace 10 Plus tablets (Merck Sharp & Dohme Ltd)                                 |
| 54201                                                              | 13845711000001107  | Lisinopril/ Hydrochlorothiazide           | Lisinopril 20mg / Hydrochlorothiazide 12.5mg tablets (Almus Pharmaceuticals Ltd) |

|                                        |                    |                                           |                                                                                  |
|----------------------------------------|--------------------|-------------------------------------------|----------------------------------------------------------------------------------|
| 55399                                  | 7495911000001104   | Lisinopril/ Hydrochlorothiazide           | Lisinopril 20mg / Hydrochlorothiazide 12.5mg tablets (A A H Pharmaceuticals Ltd) |
| 56244                                  | 13754811000001101  | Lisinopril/ Hydrochlorothiazide           | Lisinopril 20mg / Hydrochlorothiazide 12.5mg tablets (Tillomed Laboratories Ltd) |
| 57539                                  | 14767411000001104  | Lisinopril/ Hydrochlorothiazide           | Zestoretic 10 tablets (Sigma Pharmaceuticals Plc)                                |
| 67767                                  | 13845511000001102  | Lisinopril/ Hydrochlorothiazide           | Lisinopril 10mg / Hydrochlorothiazide 12.5mg tablets (Almus Pharmaceuticals Ltd) |
| 71115                                  | 10483611000001104  | Lisinopril/ Hydrochlorothiazide           | Zestoretic 10 tablets (Waymade Healthcare Plc)                                   |
| 74008                                  | 5426911000001100   | Lisinopril/ Hydrochlorothiazide           | Zestoretic 20 tablets (Waymade Healthcare Plc)                                   |
| 74040                                  | 16449811000001104  | Lisinopril/ Hydrochlorothiazide           | Zestoretic 20 tablets (Lexon (UK) Ltd)                                           |
| 74874                                  | 13983811000001102  | Lisinopril/ Hydrochlorothiazide           | Zestoretic 20 tablets (DE Pharmaceuticals)                                       |
| 56157                                  | 21940011000001101  | Indapamide/ Perindopril tosilate          | Perindopril tosilate 5mg / Indapamide 1.25mg tablets                             |
| 15031                                  | 260211000001104    | Hydrochlorothiazide/ Quinapril            | Accuretic 12.5mg/ 10mg tablets (Pfizer Ltd)                                      |
| 15108                                  | 318892006          | Hydrochlorothiazide/ Quinapril            | Quinapril 10mg / Hydrochlorothiazide 12.5mg tablets                              |
| 3203                                   | 152555001000027101 | Hydrochlorothiazide/ Captopril            | Capozide LS Tablet (E R Squibb and Sons Ltd)                                     |
| 11561                                  | 318806002          | Hydrochlorothiazide/ Captopril            | Co-zidocapt 12.5mg/ 25mg tablets                                                 |
| 39227                                  | 546711000001107    | Hydrochlorothiazide/ Captopril            | Capozide LS 12.5mg/ 25mg tablets (Bristol-Myers Squibb Pharmaceuticals Ltd)      |
| 1021                                   | 146811000001108    | Enalapril maleate/<br>Hydrochlorothiazide | Innozide 20mg/ 12.5mg tablets (Merck Sharp & Dohme Ltd)                          |
| 5189                                   | 318849001          | Enalapril maleate/<br>Hydrochlorothiazide | Enalapril 20mg / Hydrochlorothiazide 12.5mg tablets                              |
| 76920                                  |                    | Enalapril maleate/<br>Hydrochlorothiazide | Enalapril 20mg / Hydrochlorothiazide 12.5mg tablets (Tillomed Laboratories Ltd)  |
| 1520                                   | 17311000001102     | Captopril/ Hydrochlorothiazide            | Capozide 25mg/ 50mg tablets (Bristol-Myers Squibb Pharmaceuticals Ltd)           |
| 10902                                  | 152515001000027106 | Captopril/ Hydrochlorothiazide            | Captopril 50mg with Hydrochlorothiazide 25mg tablets                             |
| 11133                                  | 159305001000027103 | Captopril/ Hydrochlorothiazide            | Hydrochlorothiazide with captopril 25mg with 50mg Tablet                         |
| 11351                                  | 318807006          | Captopril/ Hydrochlorothiazide            | Co-zidocapt 25mg/ 50mg tablets                                                   |
| 11641                                  | 152525001000027102 | Captopril/ Hydrochlorothiazide            | Captopril 25mg with Hydrochlorothiazide 12.5mg tablets                           |
| 15135                                  | 159315001000027101 | Captopril/ Hydrochlorothiazide            | Hydrochlorothiazide with captopril 12.5mg with 25mg Tablet                       |
| 18263                                  | 263311000001101    | Captopril/ Hydrochlorothiazide            | Acezide 25mg/ 50mg tablets (Bristol-Myers Squibb Pharmaceuticals Ltd)            |
| 32166                                  | 214775001000027102 | Captopril/ Hydrochlorothiazide            | Capto-co 25mg+50mg Tablet (IVAX Pharmaceuticals UK Ltd)                          |
| 77457                                  |                    | Captopril/ Hydrochlorothiazide            | Capozide 25mg/ 50mg tablets (Dowelhurst Ltd)                                     |
| <b>Angiotensin II receptor blocker</b> |                    |                                           |                                                                                  |
| 575                                    | 318961008          | Valsartan                                 | Valsartan 40mg capsules                                                          |
| 3222                                   | 318962001          | Valsartan                                 | Valsartan 80mg capsules                                                          |
| 4645                                   | 318963006          | Valsartan                                 | Valsartan 160mg capsules                                                         |
| 6518                                   | 117011000001107    | Valsartan                                 | Diovan 160mg capsules (Novartis Pharmaceuticals UK Ltd)                          |
| 11251                                  | 777611000001101    | Valsartan                                 | Diovan 40mg capsules (Novartis Pharmaceuticals UK Ltd)                           |
| 11252                                  | 554511000001105    | Valsartan                                 | Diovan 80mg capsules (Novartis Pharmaceuticals UK Ltd)                           |
| 14943                                  | 416515008          | Valsartan                                 | Valsartan 40mg tablets                                                           |
| 24359                                  | 8263211000001101   | Valsartan                                 | Diovan 40mg tablets (Novartis Pharmaceuticals UK Ltd)                            |
| 37573                                  | 376487009          | Valsartan                                 | Valsartan 320mg tablets                                                          |
| 38395                                  | 375034009          | Valsartan                                 | Valsartan 80mg tablets                                                           |
| 39199                                  | 13143311000001102  | Valsartan                                 | Diovan 320mg tablets (Novartis Pharmaceuticals UK Ltd)                           |
| 44778                                  | 375035005          | Valsartan                                 | Valsartan 160mg tablets                                                          |
| 45600                                  | 261655001000027107 | Valsartan                                 | Diovan 160mg Tablet (Novartis Pharmaceuticals UK Ltd)                            |

|       |                   |                      |                                                                 |
|-------|-------------------|----------------------|-----------------------------------------------------------------|
| 53833 | 19827711000001100 | Valsartan            | Valsartan 160mg capsules (Mylan)                                |
| 54726 | 19631111000001104 | Valsartan            | Valsartan 40mg capsules (Teva UK Ltd)                           |
| 55187 | 20021711000001108 | Valsartan            | Valsartan 160mg capsules (Arrow Generics Ltd)                   |
| 55821 | 19630911000001108 | Valsartan            | Valsartan 160mg capsules (Teva UK Ltd)                          |
| 58669 | 19631111000001104 | Valsartan            | Valsartan 40mg capsules (Teva UK Ltd)                           |
| 58910 | 14690811000001105 | Valsartan            | Valsartan 80mg capsules (Sigma Pharmaceuticals Plc)             |
| 59029 | 20007411000001100 | Valsartan            | Valsartan 3mg/ ml oral solution                                 |
| 59448 | 19803311000001101 | Valsartan            | Valsartan 80mg capsules (A A H Pharmaceuticals Ltd)             |
| 60076 | 21923911000001107 | Valsartan            | Valsartan 160mg capsules (Waymade Healthcare Plc)               |
| 61442 | 19630911000001108 | Valsartan            | Valsartan 160mg capsules (Teva UK Ltd)                          |
| 67663 | 19683111000001105 | Valsartan            | Valsartan 160mg capsules (Dexcel-Pharma Ltd)                    |
| 68948 | 19688111000001101 | Valsartan            | Valsartan 160mg capsules (Actavis UK Ltd)                       |
| 70628 | 20001711000001102 | Valsartan            | Diovan 3mg/ 1ml oral solution (Novartis Pharmaceuticals UK Ltd) |
| 71028 | 20021411000001102 | Valsartan            | Valsartan 80mg capsules (Arrow Generics Ltd)                    |
| 74013 | 13866611000001102 | Valsartan            | Diovan 160mg capsules (DE Pharmaceuticals)                      |
| 74055 | 15775511000001107 | Valsartan            | Valsartan 40mg/ 5ml oral solution                               |
| 74057 | 15775611000001106 | Valsartan            | Valsartan 40mg/ 5ml oral suspension                             |
| 75409 |                   | Valsartan            | Valsartan 80mg capsules (Teva UK Ltd)                           |
| 5988  | 318986004         | Telmisartan          | Telmisartan 40mg tablets                                        |
| 6243  | 134463001         | Telmisartan          | Telmisartan 20mg tablets                                        |
| 12874 | 318987008         | Telmisartan          | Telmisartan 80mg tablets                                        |
| 13821 | 924911000001106   | Telmisartan          | Micardis 40mg tablets (Boehringer Ingelheim Ltd)                |
| 17545 | 527411000001102   | Telmisartan          | Micardis 80mg tablets (Boehringer Ingelheim Ltd)                |
| 17686 | 648711000001100   | Telmisartan          | Micardis 20mg tablets (Boehringer Ingelheim Ltd)                |
| 61177 | 14625011000001101 | Telmisartan          | Telmisartan 20mg tablets (Sigma Pharmaceuticals Plc)            |
| 65274 | 23669311000001109 | Telmisartan          | Telmisartan 40mg tablets (Actavis UK Ltd)                       |
| 70251 | 23613311000001107 | Telmisartan          | Telmisartan 20mg tablets (Teva UK Ltd)                          |
| 6217  | 408055003         | Olmesartan medoxomil | Olmesartan medoxomil 10mg tablets                               |
| 6285  | 385542009         | Olmesartan medoxomil | Olmesartan medoxomil 20mg tablets                               |
| 6351  | 385543004         | Olmesartan medoxomil | Olmesartan medoxomil 40mg tablets                               |
| 14983 | 4624011000001101  | Olmesartan medoxomil | Olmotec 10mg tablets (Daiichi Sankyo UK Ltd)                    |
| 18910 | 4624311000001103  | Olmesartan medoxomil | Olmotec 20mg tablets (Daiichi Sankyo UK Ltd)                    |
| 20117 | 4624611000001108  | Olmesartan medoxomil | Olmotec 40mg tablets (Daiichi Sankyo UK Ltd)                    |
| 39786 | 14680711000001103 | Olmesartan medoxomil | Olmesartan medoxomil 10mg/ 5ml oral suspension                  |
| 520   | 318955005         | Losartan potassium   | Losartan 25mg tablets                                           |
| 624   | 407784004         | Losartan potassium   | Losartan 100mg tablets                                          |
| 1780  | 318956006         | Losartan potassium   | Losartan 50mg tablets                                           |
| 4226  | 266511000001104   | Losartan potassium   | Cozaar 25mg tablets (Merck Sharp & Dohme Ltd)                   |
| 5723  | 53611000001106    | Losartan potassium   | Cozaar 50mg tablets (Merck Sharp & Dohme Ltd)                   |
| 14965 | 245811000001102   | Losartan potassium   | Cozaar 100mg tablets (Merck Sharp & Dohme Ltd)                  |
| 39944 | 15148111000001100 | Losartan potassium   | Losartan 12.5mg tablets                                         |
| 40571 | 15138911000001101 | Losartan potassium   | Cozaar 12.5mg tablets (Merck Sharp & Dohme Ltd)                 |
| 40711 | 15507411000001105 | Losartan potassium   | Losartan 2.5mg/ ml oral suspension sugar free                   |

|       |                   |                    |                                                                  |
|-------|-------------------|--------------------|------------------------------------------------------------------|
| 41232 | 15506811000001105 | Losartan potassium | Cozaar 2.5mg/ ml oral suspension (Merck Sharp & Dohme Ltd)       |
| 47006 | 17024511000001106 | Losartan potassium | Losartan 100mg tablets (Teva UK Ltd)                             |
| 48398 | 16998411000001102 | Losartan potassium | Losartan 25mg tablets (Dexcel-Pharma Ltd)                        |
| 49492 | 16971611000001102 | Losartan potassium | Losartan 25mg tablets (Mylan)                                    |
| 49588 | 16732611000001102 | Losartan potassium | Losartan 100mg tablets (A A H Pharmaceuticals Ltd)               |
| 50971 | 17015511000001104 | Losartan potassium | Losartan 25mg tablets (A A H Pharmaceuticals Ltd)                |
| 51186 | 17660711000001105 | Losartan potassium | Losartan 25mg tablets (Arrow Generics Ltd)                       |
| 51601 | 16749111000001100 | Losartan potassium | Losartan 50mg tablets (Actavis UK Ltd)                           |
| 52427 | 18226311000001106 | Losartan potassium | Cozaar 100mg tablets (Necessity Supplies Ltd)                    |
| 52658 | 15451211000001101 | Losartan potassium | Losartan 100mg/ 5ml oral suspension                              |
| 52659 | 14159411000001106 | Losartan potassium | Losartan 50mg/ 5ml oral solution                                 |
| 52886 | 17015311000001105 | Losartan potassium | Losartan 12.5mg tablets (A A H Pharmaceuticals Ltd)              |
| 54049 | 18464011000001108 | Losartan potassium | Losartan 50mg tablets (Accord Healthcare Ltd)                    |
| 54057 | 17024311000001100 | Losartan potassium | Losartan 50mg tablets (Teva UK Ltd)                              |
| 54404 | 16749311000001103 | Losartan potassium | Losartan 100mg tablets (Actavis UK Ltd)                          |
| 54735 | 17026111000001109 | Losartan potassium | Losartan 50mg tablets (Alliance Healthcare (Distribution) Ltd)   |
| 54740 | 16748711000001108 | Losartan potassium | Losartan 25mg tablets (Actavis UK Ltd)                           |
| 54843 | 16998911000001105 | Losartan potassium | Losartan 50mg tablets (Dexcel-Pharma Ltd)                        |
| 55296 | 16971811000001103 | Losartan potassium | Losartan 50mg tablets (Mylan)                                    |
| 55446 | 21037511000001102 | Losartan potassium | Losartan 100mg tablets (Bristol Laboratories Ltd)                |
| 55718 | 18140111000001105 | Losartan potassium | Losartan 25mg tablets (Phoenix Healthcare Distribution Ltd)      |
| 56104 | 16732411000001100 | Losartan potassium | Losartan 50mg tablets (A A H Pharmaceuticals Ltd)                |
| 56970 | 18169911000001109 | Losartan potassium | Losartan 100mg tablets (Pfizer Ltd)                              |
| 57028 | 16972011000001101 | Losartan potassium | Losartan 100mg tablets (Mylan)                                   |
| 58274 | 18463811000001100 | Losartan potassium | Losartan 25mg tablets (Accord Healthcare Ltd)                    |
| 58649 | 21033711000001102 | Losartan potassium | Losartan 25mg tablets (Bristol Laboratories Ltd)                 |
| 58967 | 17025711000001102 | Losartan potassium | Losartan 12.5mg tablets (Alliance Healthcare (Distribution) Ltd) |
| 59086 | 20571411000001104 | Losartan potassium | Losartan 25mg tablets (Wockhardt UK Ltd)                         |
| 59271 | 20308011000001106 | Losartan potassium | Losartan 25mg tablets (Sandoz Ltd)                               |
| 59340 | 16998111000001107 | Losartan potassium | Losartan 12.5mg tablets (Dexcel-Pharma Ltd)                      |
| 59351 | 18170211000001103 | Losartan potassium | Losartan 50mg tablets (Pfizer Ltd)                               |
| 59750 | 22338211000001101 | Losartan potassium | Losartan 50mg tablets (Aptil Pharma Ltd)                         |
| 59903 | 14159511000001105 | Losartan potassium | Losartan 50mg/ 5ml oral suspension                               |
| 60506 | 16999411000001105 | Losartan potassium | Losartan 100mg tablets (Dexcel-Pharma Ltd)                       |
| 61053 | 17026311000001106 | Losartan potassium | Losartan 100mg tablets (Alliance Healthcare (Distribution) Ltd)  |
| 61288 | 18463611000001104 | Losartan potassium | Losartan 100mg tablets (Accord Healthcare Ltd)                   |
| 61495 | 22338011000001106 | Losartan potassium | Losartan 25mg tablets (Aptil Pharma Ltd)                         |
| 61754 | 14204111000001106 | Losartan potassium | Losartan 25mg/ 5ml oral suspension                               |
| 62388 | 24372011000001100 | Losartan potassium | Losartan 12.5mg tablets (DE Pharmaceuticals)                     |
| 63222 | 18170411000001104 | Losartan potassium | Losartan 25mg tablets (Pfizer Ltd)                               |
| 63918 | 17024111000001102 | Losartan potassium | Losartan 25mg tablets (Teva UK Ltd)                              |
| 64888 | 29898911000001106 | Losartan potassium | Losartan 12.5mg tablets (Sigma Pharmaceuticals Plc)              |
| 65094 | 20308411000001102 | Losartan potassium | Losartan 50mg tablets (Sandoz Ltd)                               |



|       |                    |                    |                                                                        |
|-------|--------------------|--------------------|------------------------------------------------------------------------|
| 66114 | 30811311000001102  | Losartan potassium | Losartan 12.5mg tablets (Mawdsley-Brooks & Company Ltd)                |
| 66551 | 21036211000001102  | Losartan potassium | Losartan 50mg tablets (Bristol Laboratories Ltd)                       |
| 67902 | 20308611000001104  | Losartan potassium | Losartan 100mg tablets (Sandoz Ltd)                                    |
| 68340 | 32661211000001105  | Losartan potassium | Losartan 12.5mg tablets (Consilient Health Ltd)                        |
| 68603 | 20571811000001102  | Losartan potassium | Losartan 50mg tablets (Wockhardt UK Ltd)                               |
| 69667 | 15451111000001107  | Losartan potassium | Losartan 100mg/ 5ml oral solution                                      |
| 69858 | 17025911000001100  | Losartan potassium | Losartan 25mg tablets (Alliance Healthcare (Distribution) Ltd)         |
| 70325 | 32617311000001107  | Losartan potassium | Losartan 50mg tablets (Almus Pharmaceuticals Ltd)                      |
| 70765 | 32616911000001105  | Losartan potassium | Losartan 100mg tablets (Almus Pharmaceuticals Ltd)                     |
| 71910 | 18494111000001106  | Losartan potassium | Losartan 50mg tablets (Necessity Supplies Ltd)                         |
| 74243 | 35657011000001102  | Losartan potassium | Losartan 50mg tablets (Consilient Health Ltd)                          |
| 74589 | 32753911000001104  | Losartan potassium | Losartan 25mg tablets (Genesis Pharmaceuticals Ltd)                    |
| 74904 | 24372211000001105  | Losartan potassium | Losartan 25mg tablets (DE Pharmaceuticals)                             |
| 77196 |                    | Losartan potassium | Losartan 25mg tablets (Kent Pharmaceuticals Ltd)                       |
| 77408 |                    | Losartan potassium | Cozaar 50mg tablets (Waymade Healthcare Plc)                           |
| 828   | 318968002          | Irbesartan         | Irbesartan 75mg tablets                                                |
| 1293  | 318969005          | Irbesartan         | Irbesartan 150mg tablets                                               |
| 2971  | 318970006          | Irbesartan         | Irbesartan 300mg tablets                                               |
| 7338  | 434511000001104    | Irbesartan         | Aprovel 75mg tablets (Sanofi)                                          |
| 9196  | 859711000001103    | Irbesartan         | Aprovel 150mg tablets (Sanofi)                                         |
| 11348 | 323211000001107    | Irbesartan         | Aprovel 300mg tablets (Sanofi)                                         |
| 36939 | 12639511000001103  | Irbesartan         | Irbesartan 300mg/ 5ml oral suspension                                  |
| 52972 | 14261011000001108  | Irbesartan         | Irbesartan 300mg tablets (Sigma Pharmaceuticals Plc)                   |
| 55017 | 21285511000001106  | Irbesartan         | Irbesartan 300mg tablets (Accord Healthcare Ltd)                       |
| 58108 | 21230711000001102  | Irbesartan         | Irbesartan 150mg tablets (A A H Pharmaceuticals Ltd)                   |
| 58201 | 21219211000001108  | Irbesartan         | Irbesartan 150mg tablets (Actavis UK Ltd)                              |
| 59393 | 21993211000001106  | Irbesartan         | Irbesartan 300mg tablets (Sandoz Ltd)                                  |
| 60597 | 21112911000001107  | Irbesartan         | Irbesartan 150mg tablets (Teva UK Ltd)                                 |
| 61781 | 21113111000001103  | Irbesartan         | Irbesartan 300mg tablets (Teva UK Ltd)                                 |
| 62415 | 21100511000001103  | Irbesartan         | Irbesartan 300mg tablets (A A H Pharmaceuticals Ltd)                   |
| 63385 | 21522211000001102  | Irbesartan         | Sabervel 75mg tablets (Aspire Pharma Ltd)                              |
| 63411 | 21123811000001104  | Irbesartan         | Irbesartan 300mg tablets (Alliance Healthcare (Distribution) Ltd)      |
| 63717 | 24177711000001109  | Irbesartan         | Irbesartan 300mg tablets (DE Pharmaceuticals)                          |
| 65065 | 21230511000001107  | Irbesartan         | Irbesartan 75mg tablets (A A H Pharmaceuticals Ltd)                    |
| 70431 | 27588011000001102  | Irbesartan         | Irbesartan 150mg tablets (Lupin Healthcare (UK) Ltd)                   |
| 70955 | 194235001000027100 | Irbesartan         | Irbesartan 300mg/ 5ml Oral suspension (Martindale Pharmaceuticals Ltd) |
| 71019 | 21623611000001102  | Irbesartan         | Irbesartan 75mg tablets (Dr Reddy's Laboratories (UK) Ltd)             |
| 71096 | 21624111000001107  | Irbesartan         | Irbesartan 150mg tablets (Dr Reddy's Laboratories (UK) Ltd)            |
| 71215 | 21219011000001103  | Irbesartan         | Irbesartan 75mg tablets (Actavis UK Ltd)                               |
| 72000 | 21123311000001108  | Irbesartan         | Irbesartan 150mg tablets (Alliance Healthcare (Distribution) Ltd)      |
| 76202 |                    | Irbesartan         | Irbesartan 150mg/ 5ml oral suspension                                  |
| 76797 |                    | Irbesartan         | Ifirmasta 75mg tablets (Consilient Health Ltd)                         |
| 77350 |                    | Irbesartan         | Aprovel 150mg tablets (Dowelhurst Ltd)                                 |

|       |                   |                        |                                                                   |
|-------|-------------------|------------------------|-------------------------------------------------------------------|
| 77443 |                   | Irbesartan             | Aprovel 300mg tablets (Mawdsley-Brooks & Company Ltd)             |
| 78012 |                   | Irbesartan             | lfirmasta 150mg tablets (Consilient Health Ltd)                   |
| 6939  | 318994006         | Eprosartan mesilate    | Eprosartan 300mg tablets                                          |
| 9745  | 401211000001105   | Eprosartan mesilate    | Teveten 300mg tablets (Mylan)                                     |
| 12836 | 318996008         | Eprosartan mesilate    | Eprosartan 600mg tablets                                          |
| 13123 | 318995007         | Eprosartan mesilate    | Eprosartan 400mg tablets                                          |
| 16285 | 151411000001103   | Eprosartan mesilate    | Teveten 400mg tablets (Abbott Healthcare Products Ltd)            |
| 16371 | 872011000001109   | Eprosartan mesilate    | Teveten 600mg tablets (Mylan)                                     |
| 63337 | 21229711000001107 | Eprosartan mesilate    | Eprosartan 600mg tablets (A A H Pharmaceuticals Ltd)              |
| 529   | 318977009         | Candesartan ciloxetine | Candesartan 2mg tablets                                           |
| 531   | 318978004         | Candesartan ciloxetine | Candesartan 4mg tablets                                           |
| 4155  | 97311000001103    | Candesartan ciloxetine | Amias 2mg tablets (Takeda UK Ltd)                                 |
| 4685  | 857411000001100   | Candesartan ciloxetine | Amias 4mg tablets (Takeda UK Ltd)                                 |
| 4741  | 318980005         | Candesartan ciloxetine | Candesartan 16mg tablets                                          |
| 4818  | 318979007         | Candesartan ciloxetine | Candesartan 8mg tablets                                           |
| 5013  | 36011000001106    | Candesartan ciloxetine | Amias 8mg tablets (Takeda UK Ltd)                                 |
| 5117  | 908511000001100   | Candesartan ciloxetine | Amias 16mg tablets (Takeda UK Ltd)                                |
| 7043  | 376998003         | Candesartan ciloxetine | Candesartan 32mg tablets                                          |
| 31072 | 8983911000001107  | Candesartan ciloxetine | Amias 32mg tablets (Takeda UK Ltd)                                |
| 50185 | 20476311000001109 | Candesartan ciloxetine | Candesartan 8mg tablets (Teva UK Ltd)                             |
| 51117 | 13840411000001108 | Candesartan ciloxetine | Candesartan 8mg tablets (DE Pharmaceuticals)                      |
| 51519 | 20495911000001109 | Candesartan ciloxetine | Candesartan 8mg tablets (A A H Pharmaceuticals Ltd)               |
| 51647 | 16353011000001102 | Candesartan ciloxetine | Candesartan 4mg tablets (Mawdsley-Brooks & Company Ltd)           |
| 52208 | 20496211000001106 | Candesartan ciloxetine | Candesartan 16mg tablets (A A H Pharmaceuticals Ltd)              |
| 52559 | 20913011000001106 | Candesartan ciloxetine | Candesartan 8mg tablets (Zentiva)                                 |
| 53680 | 20476511000001103 | Candesartan ciloxetine | Candesartan 16mg tablets (Teva UK Ltd)                            |
| 53755 | 20476011000001106 | Candesartan ciloxetine | Candesartan 4mg tablets (Teva UK Ltd)                             |
| 54326 | 20476711000001108 | Candesartan ciloxetine | Candesartan 32mg tablets (Teva UK Ltd)                            |
| 54414 | 20530511000001105 | Candesartan ciloxetine | Candesartan 16mg tablets (Consilient Health Ltd)                  |
| 57026 | 21813511000001100 | Candesartan ciloxetine | Candesartan 8mg tablets (Waymade Healthcare Plc)                  |
| 57266 | 21666411000001103 | Candesartan ciloxetine | Candesartan 2mg tablets (Actavis UK Ltd)                          |
| 57273 | 20483811000001104 | Candesartan ciloxetine | Candesartan 8mg tablets (Actavis UK Ltd)                          |
| 57977 | 20509411000001107 | Candesartan ciloxetine | Candesartan 16mg tablets (Alliance Healthcare (Distribution) Ltd) |
| 58646 | 20483511000001102 | Candesartan ciloxetine | Candesartan 4mg tablets (Actavis UK Ltd)                          |
| 59690 | 20530311000001104 | Candesartan ciloxetine | Candesartan 8mg tablets (Consilient Health Ltd)                   |
| 59802 | 20595811000001108 | Candesartan ciloxetine | Candesartan 2mg tablets (Teva UK Ltd)                             |
| 62035 | 21813311000001106 | Candesartan ciloxetine | Candesartan 16mg tablets (Waymade Healthcare Plc)                 |
| 62140 | 24505711000001100 | Candesartan ciloxetine | Candesartan 4mg tablets (Sandoz Ltd)                              |
| 64359 | 22626711000001100 | Candesartan ciloxetine | Candesartan 4mg tablets (DE Pharmaceuticals)                      |
| 65228 | 16353811000001108 | Candesartan ciloxetine | Candesartan 16mg tablets (Mawdsley-Brooks & Company Ltd)          |
| 65479 | 20493511000001101 | Candesartan ciloxetine | Candesartan 2mg tablets (A A H Pharmaceuticals Ltd)               |
| 66624 | 24506211000001101 | Candesartan ciloxetine | Candesartan 16mg tablets (Sandoz Ltd)                             |
| 66958 | 24506011000001106 | Candesartan ciloxetine | Candesartan 8mg tablets (Sandoz Ltd)                              |

|                                                                                      |                   |                                                                   |                                                               |
|--------------------------------------------------------------------------------------|-------------------|-------------------------------------------------------------------|---------------------------------------------------------------|
| 67929                                                                                | 32554811000001106 | Candesartan cilexetil                                             | Candesartan 16mg tablets (Tillomed Laboratories Ltd)          |
| 68647                                                                                | 32746311000001107 | Candesartan cilexetil                                             | Candesartan 8mg tablets (Genesis Pharmaceuticals Ltd)         |
| 68718                                                                                | 20495511000001102 | Candesartan cilexetil                                             | Candesartan 4mg tablets (A A H Pharmaceuticals Ltd)           |
| 68751                                                                                | 32746511000001101 | Candesartan cilexetil                                             | Candesartan 16mg tablets (Genesis Pharmaceuticals Ltd)        |
| 69802                                                                                | 33582711000001106 | Candesartan cilexetil                                             | Candesartan 4mg tablets (Mylan)                               |
| 70455                                                                                | 15825311000001103 | Candesartan cilexetil                                             | Candesartan 4mg/ 5ml oral suspension                          |
| 70805                                                                                | 34007811000001104 | Candesartan cilexetil                                             | Candesartan 8mg tablets (Crescent Pharma Ltd)                 |
| 71080                                                                                | 20912811000001108 | Candesartan cilexetil                                             | Candesartan 4mg tablets (Zentiva)                             |
| 72215                                                                                | 20530011000001102 | Candesartan cilexetil                                             | Candesartan 4mg tablets (Consilient Health Ltd)               |
| 72924                                                                                | 23646611000001101 | Candesartan cilexetil                                             | Candesartan 4mg tablets (Phoenix Healthcare Distribution Ltd) |
| 73528                                                                                | 35139711000001105 | Candesartan cilexetil                                             | Candesartan 4mg tablets (Milpharm Ltd)                        |
| 73811                                                                                | 22947511000001109 | Candesartan cilexetil                                             | Candesartan 2mg tablets (Ranbaxy (UK) Ltd)                    |
| 73813                                                                                | 21812911000001100 | Candesartan cilexetil                                             | Candesartan 4mg tablets (Waymade Healthcare Plc)              |
| 75407                                                                                |                   | Candesartan cilexetil                                             | Candesartan 32mg tablets (Sandoz Ltd)                         |
| 75418                                                                                |                   | Candesartan cilexetil                                             | Candesartan 16mg tablets (Mylan)                              |
| 76070                                                                                |                   | Candesartan cilexetil                                             | Candesartan 8mg tablets (Almus Pharmaceuticals Ltd)           |
| 76209                                                                                |                   | Candesartan cilexetil                                             | Candesartan 8mg tablets (Mylan)                               |
| 77128                                                                                |                   | Candesartan cilexetil                                             | Candesartan 16mg tablets (Actavis UK Ltd)                     |
| 51368                                                                                | 449333009         | Azilsartan medoxomil                                              | Azilsartan medoxomil 80mg tablets                             |
| 51897                                                                                | 20350911000001100 | Azilsartan medoxomil                                              | Edarbi 20mg tablets (Takeda UK Ltd)                           |
| 56606                                                                                | 449109006         | Azilsartan medoxomil                                              | Azilsartan medoxomil 40mg tablets                             |
| 76119                                                                                |                   | Azilsartan medoxomil                                              | Azilsartan medoxomil 20mg tablets                             |
| 76121                                                                                |                   | Azilsartan medoxomil                                              | Edarbi 40mg tablets (Takeda UK Ltd)                           |
| 31160                                                                                |                   |                                                                   | IRBESARTAN                                                    |
| <b>Angiotensin II receptor blockers in combination with calcium channel blockers</b> |                   |                                                                   |                                                               |
| 35096                                                                                | 11160711000001108 | Valsartan/ Amlodipine besilate                                    | Exforge 10mg/ 160mg tablets (Novartis Pharmaceuticals UK Ltd) |
| 35189                                                                                | 11160111000001107 | Valsartan/ Amlodipine besilate                                    | Amlodipine 10mg / Valsartan 160mg tablets                     |
| 35317                                                                                | 11161811000001108 | Valsartan/ Amlodipine besilate                                    | Exforge 5mg/ 80mg tablets (Novartis Pharmaceuticals UK Ltd)   |
| 35329                                                                                | 11160311000001109 | Valsartan/ Amlodipine besilate                                    | Amlodipine 5mg / Valsartan 80mg tablets                       |
| 35343                                                                                | 11160211000001101 | Valsartan/ Amlodipine besilate                                    | Amlodipine 5mg / Valsartan 160mg tablets                      |
| 35697                                                                                | 11161511000001105 | Valsartan/ Amlodipine besilate                                    | Exforge 5mg/ 160mg tablets (Novartis Pharmaceuticals UK Ltd)  |
| 47727                                                                                | 18987311000001103 | Olmesartan medoxomil/<br>Hydrochlorothiazide/ Amlodipine besilate | Sevikar HCT 40mg/ 5mg/ 25mg tablets (Daiichi Sankyo UK Ltd)   |
| 53220                                                                                | 18987611000001108 | Olmesartan medoxomil/<br>Hydrochlorothiazide/ Amlodipine besilate | Sevikar HCT 40mg/ 10mg/ 25mg tablets (Daiichi Sankyo UK Ltd)  |
| 39984                                                                                | 15773211000001105 | Olmesartan medoxomil/ Amlodipine besilate                         | Sevikar 20mg/ 5mg tablets (Daiichi Sankyo UK Ltd)             |
| 40316                                                                                | 429502004         | Olmesartan medoxomil/ Amlodipine besilate                         | Olmesartan medoxomil 20mg / Amlodipine 5mg tablets            |
| 40639                                                                                | 429503009         | Olmesartan medoxomil/ Amlodipine besilate                         | Olmesartan medoxomil 40mg / Amlodipine 5mg tablets            |

|       |                    |                                                                |                                                                                          |
|-------|--------------------|----------------------------------------------------------------|------------------------------------------------------------------------------------------|
| 40668 | 429678006          | Olmesartan medoxomil/ Amlodipine besilate                      | Olmesartan medoxomil 40mg / Amlodipine 10mg tablets                                      |
| 41203 | 15772611000001102  | Olmesartan medoxomil/ Amlodipine besilate                      | Sevikar 40mg/ 10mg tablets (Daiichi Sankyo UK Ltd)                                       |
| 41205 | 15772911000001108  | Olmesartan medoxomil/ Amlodipine besilate                      | Sevikar 40mg/ 5mg tablets (Daiichi Sankyo UK Ltd)                                        |
| 46355 | 18986411000001108  | Hydrochlorothiazide/ Olmesartan medoxomil/ Amlodipine besilate | Sevikar HCT 20mg/ 5mg/ 12.5mg tablets (Daiichi Sankyo UK Ltd)                            |
| 60780 | 18987811000001107  | Hydrochlorothiazide/ Olmesartan medoxomil/ Amlodipine besilate | Generic Sevikar HCT 20mg/ 5mg/ 12.5mg tablets                                            |
| 46687 | 264945001000027103 | Amlodipine/ Hydrochlorothiazide/ Olmesartan Medoxomil          | Olmesartan medoxomil with amlodipine and hydrochlorothiazide 20mg + 5mg + 12.5mg Tablet  |
| 46715 | 264965001000027109 | Amlodipine/ Hydrochlorothiazide/ Olmesartan Medoxomil          | Olmesartan medoxomil with amlodipine and hydrochlorothiazide 40mg + 10mg + 12.5mg Tablet |
| 46792 | 264955001000027100 | Amlodipine/ Hydrochlorothiazide/ Olmesartan Medoxomil          | Olmesartan medoxomil with amlodipine and hydrochlorothiazide 40mg + 5mg + 12.5mg Tablet  |
| 47467 | 264975001000027102 | Amlodipine/ Hydrochlorothiazide/ Olmesartan Medoxomil          | Olmesartan medoxomil with amlodipine and hydrochlorothiazide 40mg + 5mg + 25mg Tablet    |
| 55358 | 264985001000027107 | Amlodipine/ Hydrochlorothiazide/ Olmesartan Medoxomil          | Olmesartan medoxomil with amlodipine and hydrochlorothiazide 40mg + 10mg + 25mg Tablet   |
| 35173 | 246845001000027107 | Amlodipine Besilate/ Valsartan                                 | Valsartan 160mg with amlodipine 5mg tablets                                              |
| 35174 | 246835001000027106 | Amlodipine Besilate/ Valsartan                                 | Valsartan 80mg with amlodipine 5mg tablets                                               |
| 35304 | 246855001000027105 | Amlodipine Besilate/ Valsartan                                 | Valsartan 160mg with amlodipine 10mg tablets                                             |
| 47573 | 18986711000001102  | Amlodipine besilate/ Hydrochlorothiazide/ Olmesartan medoxomil | Sevikar HCT 40mg/ 5mg/ 12.5mg tablets (Daiichi Sankyo UK Ltd)                            |
| 47616 | 18987011000001101  | Amlodipine besilate/ Hydrochlorothiazide/ Olmesartan medoxomil | Sevikar HCT 40mg/ 10mg/ 12.5mg tablets (Daiichi Sankyo UK Ltd)                           |
| 60007 | 18987911000001102  | Amlodipine besilate/ Hydrochlorothiazide/ Olmesartan medoxomil | Generic Sevikar HCT 40mg/ 10mg/ 12.5mg tablets                                           |

#### Angiotensin II receptor blockers and diuretics

|       |                    |                                |                                                                   |
|-------|--------------------|--------------------------------|-------------------------------------------------------------------|
| 764   | 8150111000001108   | Valsartan/ Hydrochlorothiazide | Co-Diovan 80mg/ 12.5mg tablets (Novartis Pharmaceuticals UK Ltd)  |
| 6877  | 7668611000001104   | Valsartan/ Hydrochlorothiazide | Co-Diovan 160mg/ 12.5mg tablets (Novartis Pharmaceuticals UK Ltd) |
| 11864 | 395521005          | Valsartan/ Hydrochlorothiazide | Valsartan 160mg / Hydrochlorothiazide 12.5mg tablets              |
| 14283 | 409298002          | Valsartan/ Hydrochlorothiazide | Valsartan 160mg / Hydrochlorothiazide 25mg tablets                |
| 16060 | 377488008          | Valsartan/ Hydrochlorothiazide | Valsartan 80mg / Hydrochlorothiazide 12.5mg tablets               |
| 23456 | 238185001000027100 | Valsartan/ Hydrochlorothiazide | Hydrochlorothiazide with valsartan 25mg with 160mg Tablet         |
| 24268 | 239025001000027101 | Valsartan/ Hydrochlorothiazide | Hydrochlorothiazide with valsartan 12.5mg with 80mg Tablet        |
| 24484 | 238175001000027105 | Valsartan/ Hydrochlorothiazide | Hydrochlorothiazide with valsartan 12.5mg with 160mg Tablet       |
| 25382 | 7668911000001105   | Valsartan/ Hydrochlorothiazide | Co-Diovan 160mg/ 25mg tablets (Novartis Pharmaceuticals UK Ltd)   |
| 52858 | 14206911000001101  | Valsartan/ Hydrochlorothiazide | Co-Diovan 80mg/ 12.5mg tablets (Sigma Pharmaceuticals Plc)        |

|       |                    |                                              |                                                                                |
|-------|--------------------|----------------------------------------------|--------------------------------------------------------------------------------|
| 67664 | 19631911000001101  | Valsartan/ Hydrochlorothiazide               | Valsartan 160mg / Hydrochlorothiazide 12.5mg tablets (Teva UK Ltd)             |
| 72086 | 19688511000001105  | Valsartan/ Hydrochlorothiazide               | Valsartan 160mg / Hydrochlorothiazide 12.5mg tablets (Actavis UK Ltd)          |
| 14870 | 407855002          | Telmisartan/ Hydrochlorothiazide             | Telmisartan 40mg / Hydrochlorothiazide 12.5mg tablets                          |
| 16161 | 407856001          | Telmisartan/ Hydrochlorothiazide             | Telmisartan 80mg / Hydrochlorothiazide 12.5mg tablets                          |
| 17689 | 3806911000001105   | Telmisartan/ Hydrochlorothiazide             | MicardisPlus 80mg/ 12.5mg tablets (Boehringer Ingelheim Ltd)                   |
| 18202 | 3806311000001109   | Telmisartan/ Hydrochlorothiazide             | MicardisPlus 40mg/ 12.5mg tablets (Boehringer Ingelheim Ltd)                   |
| 62376 | 24412511000001109  | Telmisartan/ Hydrochlorothiazide             | Actelsar HCT 80mg/ 12.5mg tablets (Actavis UK Ltd)                             |
| 63890 | 10540911000001100  | Telmisartan/ Hydrochlorothiazide             | MicardisPlus 80mg/ 12.5mg tablets (Waymade Healthcare Plc)                     |
| 66997 | 29749811000001100  | Telmisartan/ Hydrochlorothiazide             | MicardisPlus 40mg/ 12.5mg tablets (Waymade Healthcare Plc)                     |
| 76840 |                    | Telmisartan/ Hydrochlorothiazide             | Actelsar HCT 40mg/ 12.5mg tablets (Actavis UK Ltd)                             |
| 43322 | 409185001          | Olmesartan medoxomil/<br>Hydrochlorothiazide | Olmesartan medoxomil 40mg / Hydrochlorothiazide 12.5mg tablets                 |
| 43915 | 17220911000001102  | Olmesartan medoxomil/<br>Hydrochlorothiazide | Olmotec Plus 40mg/ 12.5mg tablets (Daiichi Sankyo UK Ltd)                      |
| 4540  | 255911000001105    | Losartan potassium/<br>Hydrochlorothiazide   | Cozaar-Comp 50mg/ 12.5mg tablets (Merck Sharp & Dohme Ltd)                     |
| 6437  | 318959004          | Losartan potassium/<br>Hydrochlorothiazide   | Losartan 50mg / Hydrochlorothiazide 12.5mg tablets                             |
| 10323 | 395497004          | Losartan potassium/<br>Hydrochlorothiazide   | Losartan 100mg / Hydrochlorothiazide 25mg tablets                              |
| 14738 | 209115001000027101 | Losartan Potassium/<br>Hydrochlorothiazide   | Hydrochlorothiazide with losartan 12.5mg with 50mg Tablet                      |
| 21423 | 9566911000001105   | Losartan potassium/<br>Hydrochlorothiazide   | Cozaar-Comp 100mg/ 25mg tablets (Merck Sharp & Dohme Ltd)                      |
| 24632 | 241785001000027103 | Losartan Potassium/<br>Hydrochlorothiazide   | Hydrochlorothiazide with losartan 25mg with 100mg Tablet                       |
| 38367 | 250095001000027100 | Losartan Potassium/<br>Hydrochlorothiazide   | Hydrochlorothiazide with losartan 12.5mg with 100mg Tablet                     |
| 52189 | 17015111000001108  | Losartan potassium/<br>Hydrochlorothiazide   | Losartan 100mg / Hydrochlorothiazide 25mg tablets (A A H Pharmaceuticals Ltd)  |
| 55160 | 14210911000001101  | Losartan potassium/<br>Hydrochlorothiazide   | Cozaar-Comp 50mg/ 12.5mg tablets (Sigma Pharmaceuticals Plc)                   |
| 56204 | 18165111000001109  | Losartan potassium/<br>Hydrochlorothiazide   | Losartan 50mg / Hydrochlorothiazide 12.5mg tablets (Actavis UK Ltd)            |
| 56975 | 17014911000001107  | Losartan potassium/<br>Hydrochlorothiazide   | Losartan 50mg / Hydrochlorothiazide 12.5mg tablets (A A H Pharmaceuticals Ltd) |
| 57796 | 19541911000001108  | Losartan potassium/<br>Hydrochlorothiazide   | Cozaar-Comp 50mg/ 12.5mg tablets (DE Pharmaceuticals)                          |
| 62911 | 17024711000001101  | Losartan potassium/<br>Hydrochlorothiazide   | Losartan 50mg / Hydrochlorothiazide 12.5mg tablets (Teva UK Ltd)               |
| 66598 | 27475411000001100  | Losartan potassium/<br>Hydrochlorothiazide   | Losartan 50mg / Hydrochlorothiazide 12.5mg tablets (Lupin Healthcare (UK) Ltd) |
| 70754 | 18552511000001109  | Losartan potassium/<br>Hydrochlorothiazide   | Losartan 50mg / Hydrochlorothiazide 12.5mg tablets (Ranbaxy (UK) Ltd)          |

|                                                      |                    |                                                                      |                                                                                           |
|------------------------------------------------------|--------------------|----------------------------------------------------------------------|-------------------------------------------------------------------------------------------|
| 71682                                                | 30826311000001104  | Losartan potassium/<br>Hydrochlorothiazide                           | Losartan 100mg / Hydrochlorothiazide 25mg tablets (Mawdsley-Brooks & Company Ltd)         |
| 74215                                                | 24371611000001101  | Losartan potassium/<br>Hydrochlorothiazide                           | Losartan 50mg / Hydrochlorothiazide 12.5mg tablets (DE Pharmaceuticals)                   |
| 11469                                                | 134460003          | Irbesartan/ Hydrochlorothiazide                                      | Irbesartan 300mg / Hydrochlorothiazide 12.5mg tablets                                     |
| 11526                                                | 682711000001109    | Irbesartan/ Hydrochlorothiazide                                      | CoAprovel 300mg/ 12.5mg tablets (Sanofi)                                                  |
| 35196                                                | 10968611000001106  | Irbesartan/ Hydrochlorothiazide                                      | CoAprovel 300mg/ 25mg tablets (Sanofi)                                                    |
| 35481                                                | 10970311000001105  | Irbesartan/ Hydrochlorothiazide                                      | Irbesartan 300mg / Hydrochlorothiazide 25mg tablets                                       |
| 62337                                                | 23472611000001104  | Irbesartan/ Hydrochlorothiazide                                      | Irbesartan 300mg / Hydrochlorothiazide 12.5mg tablets (Actavis UK Ltd)                    |
| 77641                                                |                    | Irbesartan/ Hydrochlorothiazide                                      | CoAprovel 300mg/ 12.5mg tablets (Mawdsley-Brooks & Company Ltd)                           |
| 38459                                                | 13731911000001109  | Hydrochlorothiazide/ Telmisartan                                     | Telmisartan 80mg / Hydrochlorothiazide 25mg tablets                                       |
| 38889                                                | 13719711000001103  | Hydrochlorothiazide/ Telmisartan                                     | MicardisPlus 80mg/ 25mg tablets (Boehringer Ingelheim Ltd)                                |
| 71748                                                | 24413611000001103  | Hydrochlorothiazide/ Telmisartan                                     | Actelsar HCT 80mg/ 25mg tablets (Actavis UK Ltd)                                          |
| 18200                                                | 409184002          | Hydrochlorothiazide/ Olmesartan<br>medoxomil                         | Olmesartan medoxomil 20mg / Hydrochlorothiazide 12.5mg tablets                            |
| 18903                                                | 10270711000001105  | Hydrochlorothiazide/ Olmesartan<br>medoxomil                         | Olmesartan medoxomil 20mg / Hydrochlorothiazide 25mg tablets                              |
| 27520                                                | 10261811000001100  | Hydrochlorothiazide/ Olmesartan<br>medoxomil                         | Olmotec Plus 20mg/ 25mg tablets (Daiichi Sankyo UK Ltd)                                   |
| 29634                                                | 10261511000001103  | Hydrochlorothiazide/ Olmesartan<br>medoxomil                         | Olmotec Plus 20mg/ 12.5mg tablets (Daiichi Sankyo UK Ltd)                                 |
| 35380                                                | 242645001000027102 | Hydrochlorothiazide/ Olmesartan<br>Medoxomil                         | Hydrochlorothiazide with olmesartan medoxomil 12.5mg with 20mg tablet                     |
| 39021                                                | 242635001000027103 | Hydrochlorothiazide/ Olmesartan<br>Medoxomil                         | Hydrochlorothiazide with olmesartan medoxomil 25mg with 20mg tablet                       |
| 37650                                                | 13112711000001103  | Hydrochlorothiazide/ Losartan<br>potassium                           | Losartan 100mg / Hydrochlorothiazide 12.5mg tablets                                       |
| 37747                                                | 13094111000001102  | Hydrochlorothiazide/ Losartan<br>potassium                           | Cozaar-Comp 100mg/ 12.5mg tablets (Merck Sharp & Dohme Ltd)                               |
| 48039                                                | 19485511000001100  | Hydrochlorothiazide/ Losartan<br>potassium                           | Losartan 100mg / Hydrochlorothiazide 12.5mg tablets (Teva UK Ltd)                         |
| 70922                                                | 18618811000001108  | Hydrochlorothiazide/ Losartan<br>potassium                           | Losartan 100mg / Hydrochlorothiazide 12.5mg tablets (Phoenix Healthcare Distribution Ltd) |
| 71618                                                | 18276311000001107  | Hydrochlorothiazide/ Losartan<br>potassium                           | Losartan 100mg / Hydrochlorothiazide 12.5mg tablets (A A H Pharmaceuticals Ltd)           |
| 10316                                                | 792411000001108    | Hydrochlorothiazide/ Irbesartan                                      | CoAprovel 150mg/ 12.5mg tablets (Sanofi)                                                  |
| 11448                                                | 134461004          | Hydrochlorothiazide/ Irbesartan                                      | Irbesartan 150mg / Hydrochlorothiazide 12.5mg tablets                                     |
| <b>Other fixed combinations of antihypertensives</b> |                    |                                                                      |                                                                                           |
| 47727                                                | 18987311000001103  | Olmesartan medoxomil/<br>Hydrochlorothiazide/ Amlodipine<br>besilate | Sevikar HCT 40mg/ 5mg/ 25mg tablets (Daiichi Sankyo UK Ltd)                               |

|                                |                    |                                                                   |                                                                                          |
|--------------------------------|--------------------|-------------------------------------------------------------------|------------------------------------------------------------------------------------------|
| 53220                          | 18987611000001108  | Olmesartan medoxomil/<br>Hydrochlorothiazide/ Amlodipine besilate | Sevikar HCT 40mg/ 10mg/ 25mg tablets (Daiichi Sankyo UK Ltd)                             |
| 46355                          | 18986411000001108  | Hydrochlorothiazide/ Olmesartan medoxomil/ Amlodipine besilate    | Sevikar HCT 20mg/ 5mg/ 12.5mg tablets (Daiichi Sankyo UK Ltd)                            |
| 60780                          | 18987811000001107  | Hydrochlorothiazide/ Olmesartan medoxomil/ Amlodipine besilate    | Generic Sevikar HCT 20mg/ 5mg/ 12.5mg tablets                                            |
| 18606                          | 216735001000027106 | Diltiazem / Hydrochlorothiazide                                   | Diltiazem and hydrochlorothiazide 150mg+12.5mg modified-release capsules                 |
| 23505                          | 216725001000027109 | Diltiazem / Hydrochlorothiazide                                   | Adizem xl plus 150mg+12.5mg Modified-release capsule (Napp Pharmaceuticals Ltd)          |
| 4406                           | 48465001000027107  | Benzthiazide/ methoserpidine                                      | Decaserpyl plus Tablet (Roussel Laboratories Ltd)                                        |
| 29696                          | 124515001000027108 | Benzthiazide/ methoserpidine                                      | Methoserpidine with benzthiazide Tablet                                                  |
| 46687                          | 264945001000027103 | Amlodipine/ Hydrochlorothiazide/<br>Olmesartan Medoxomil          | Olmesartan medoxomil with amlodipine and hydrochlorothiazide 20mg + 5mg + 12.5mg Tablet  |
| 46715                          | 264965001000027109 | Amlodipine/ Hydrochlorothiazide/<br>Olmesartan Medoxomil          | Olmesartan medoxomil with amlodipine and hydrochlorothiazide 40mg + 10mg + 12.5mg Tablet |
| 46792                          | 264955001000027100 | Amlodipine/ Hydrochlorothiazide/<br>Olmesartan Medoxomil          | Olmesartan medoxomil with amlodipine and hydrochlorothiazide 40mg + 5mg + 12.5mg Tablet  |
| 47467                          | 264975001000027102 | Amlodipine/ Hydrochlorothiazide/<br>Olmesartan Medoxomil          | Olmesartan medoxomil with amlodipine and hydrochlorothiazide 40mg + 5mg + 25mg Tablet    |
| 55358                          | 264985001000027107 | Amlodipine/ Hydrochlorothiazide/<br>Olmesartan Medoxomil          | Olmesartan medoxomil with amlodipine and hydrochlorothiazide 40mg + 10mg + 25mg Tablet   |
| 47573                          | 18986711000001102  | Amlodipine besilate/<br>Hydrochlorothiazide/ Olmesartan medoxomil | Sevikar HCT 40mg/ 5mg/ 12.5mg tablets (Daiichi Sankyo UK Ltd)                            |
| 47616                          | 18987011000001101  | Amlodipine besilate/<br>Hydrochlorothiazide/ Olmesartan medoxomil | Sevikar HCT 40mg/ 10mg/ 12.5mg tablets (Daiichi Sankyo UK Ltd)                           |
| 60007                          | 18987911000001102  | Amlodipine besilate/<br>Hydrochlorothiazide/ Olmesartan medoxomil | Generic Sevikar HCT 40mg/ 10mg/ 12.5mg tablets                                           |
| <b>Other antihypertensives</b> |                    |                                                                   |                                                                                          |
| 29757                          | 36143911000001108  | Trimetaphan camsilate                                             | Trimetaphan camsilate 250mg/ 5ml solution for injection ampoules                         |
| 36612                          | 375899001          | Sodium nitroprusside dihydrate                                    | Sodium nitroprusside 50mg powder for solution for infusion vials                         |
| 37085                          | 11394311000001108  | Sitaxentan sodium                                                 | Sitaxentan 100mg tablets                                                                 |
| 40899                          | 11392011000001104  | Sitaxentan sodium                                                 | Thelin 100mg tablets (Pfizer Ltd)                                                        |
| 64930                          | 24408611000001108  | Riociguat                                                         | Riociguat 2mg tablets                                                                    |
| 74720                          | 24399711000001103  | Riociguat                                                         | Adempas 2mg tablets (Merck Sharp & Dohme Ltd)                                            |
| 75040                          | 24408411000001105  | Riociguat                                                         | Riociguat 1mg tablets                                                                    |
| 75041                          | 24408311000001103  | Riociguat                                                         | Riociguat 1.5mg tablets                                                                  |
| 76902                          |                    | Riociguat                                                         | Riociguat 500microgram tablets                                                           |
| 20656                          | 76555001000027105  | Reserpine                                                         | Serpasil 250microgram Tablet (Novartis Pharmaceuticals UK Ltd)                           |
| 20690                          | 139815001000027109 | Reserpine                                                         | Reserpine 250micrograms tablet                                                           |
| 21502                          | 189705001000027101 | Reserpine                                                         | Serpasil 100microgram Tablet (Novartis Pharmaceuticals UK Ltd)                           |

|       |                    |            |                                                                        |
|-------|--------------------|------------|------------------------------------------------------------------------|
| 22853 | 139805001000027107 | Reserpine  | Reserpine 100micrograms tablet                                         |
| 591   | 318768008          | Prazosin   | Prazosin 1mg tablets                                                   |
| 726   | 318769000          | Prazosin   | Prazosin 2mg tablets                                                   |
| 1292  | 347411000001101    | Prazosin   | Hypovase 1mg tablets (Pfizer Ltd)                                      |
| 1455  | 318767003          | Prazosin   | Prazosin 500microgram tablets                                          |
| 3715  | 318770004          | Prazosin   | Prazosin 5mg tablets                                                   |
| 4111  | 321311000001100    | Prazosin   | Hypovase 500microgram tablets (Pfizer Ltd)                             |
| 5183  | 150911000001104    | Prazosin   | Hypovase 2mg tablets (Pfizer Ltd)                                      |
| 8198  | 14555001000027108  | Prazosin   | Hypovase 5mg Tablet (Pfizer Ltd)                                       |
| 8863  | 153625001000027101 | Prazosin   | Hypovase benign prostatic hyperplasia 1mg Tablet (Pfizer Ltd)          |
| 13610 | 570011000001106    | Prazosin   | Alphavase 2 tablets (Ashbourne Pharmaceuticals Ltd)                    |
| 19823 | 74711000001102     | Prazosin   | Alphavase 5 tablets (Ashbourne Pharmaceuticals Ltd)                    |
| 23459 | 153655001000027100 | Prazosin   | Hypovase benign prostatic hyperplasia 2mg Tablet (Pfizer Ltd)          |
| 25047 | 153615001000027105 | Prazosin   | Hypovase benign prostatic hyperplasia 500microgram Tablet (Pfizer Ltd) |
| 26237 | 30515001000027104  | Prazosin   | Alphavase 500microgram Tablet (Ashbourne Pharmaceuticals Ltd)          |
| 26238 | 934411000001100    | Prazosin   | Alphavase 1 tablets (Ashbourne Pharmaceuticals Ltd)                    |
| 26693 | 153605001000027108 | Prazosin   | Hypovase benign prostatic hyperplasia bd BD Starter pack (Pfizer Ltd)  |
| 41651 | 52515001000027104  | Prazosin   | Prazosin 500microgram Tablet (Approved Prescription Services Ltd)      |
| 41652 | 89711000001108     | Prazosin   | Prazosin 500microgram tablets (A A H Pharmaceuticals Ltd)              |
| 41721 | 778311000001107    | Prazosin   | Prazosin 1mg tablets (A A H Pharmaceuticals Ltd)                       |
| 43547 | 898711000001102    | Prazosin   | Prazosin 500microgram tablets (IVAX Pharmaceuticals UK Ltd)            |
| 46922 | 559411000001105    | Prazosin   | Prazosin 1mg tablets (IVAX Pharmaceuticals UK Ltd)                     |
| 55826 | 739211000001106    | Prazosin   | Prazosin 5mg tablets (A A H Pharmaceuticals Ltd)                       |
| 60316 | 52525001000027108  | Prazosin   | Prazosin 1mg Tablet (Approved Prescription Services Ltd)               |
| 4993  | 318707000          | Moxonidine | Moxonidine 200microgram tablets                                        |
| 7174  | 318708005          | Moxonidine | Moxonidine 400microgram tablets                                        |
| 9749  | 142811000001107    | Moxonidine | Physiotens 400microgram tablets (Mylan)                                |
| 9876  | 522011000001109    | Moxonidine | Physiotens 300microgram tablets (Mylan)                                |
| 10253 | 408604009          | Moxonidine | Moxonidine 300microgram tablets                                        |
| 11177 | 41111000001102     | Moxonidine | Physiotens 200microgram tablets (Mylan)                                |
| 33322 | 8098911000001106   | Moxonidine | Moxonidine 200microgram tablets (Sandoz Ltd)                           |
| 40310 | 8390411000001102   | Moxonidine | Moxonidine 200microgram tablets (Teva UK Ltd)                          |
| 43531 | 8099411000001106   | Moxonidine | Moxonidine 400microgram tablets (Sandoz Ltd)                           |
| 60898 | 8171411000001109   | Moxonidine | Moxonidine 200microgram tablets (Mylan)                                |
| 61036 | 21407711000001105  | Moxonidine | Physiotens 300microgram tablets (Actavis UK Ltd)                       |
| 62853 | 8936111000001107   | Moxonidine | Moxonidine 200microgram tablets (A A H Pharmaceuticals Ltd)            |
| 63938 | 8099111000001101   | Moxonidine | Moxonidine 300microgram tablets (Sandoz Ltd)                           |
| 67665 | 8265311000001105   | Moxonidine | Moxonidine 400microgram tablets (Actavis UK Ltd)                       |
| 67808 | 21406211000001100  | Moxonidine | Physiotens 200microgram tablets (Actavis UK Ltd)                       |
| 76479 |                    | Moxonidine | Moxonidine 400microgram tablets (A A H Pharmaceuticals Ltd)            |
| 2967  | 318656009          | Minoxidil  | Minoxidil 5mg tablets                                                  |
| 2968  | 318657000          | Minoxidil  | Minoxidil 10mg tablets                                                 |
| 2970  | 318655008          | Minoxidil  | Minoxidil 2.5mg tablets                                                |



|       |                    |                                  |                                                                |
|-------|--------------------|----------------------------------|----------------------------------------------------------------|
| 9463  | 3666411000001106   | Minoxidil                        | Loniten 5mg tablets (Pfizer Ltd)                               |
| 9697  | 3667011000001104   | Minoxidil                        | Loniten 2.5mg tablets (Pfizer Ltd)                             |
| 14495 | 3666711000001100   | Minoxidil                        | Loniten 10mg tablets (Pfizer Ltd)                              |
| 22454 | 167805001000027109 | Metirosine                       | Demser 250mg Capsule (Merck Sharp & Dohme Ltd)                 |
| 33788 | 167775001000027100 | Metirosine                       | Metirosine 250mg Capsule                                       |
| 7416  | 51165001000027107  | Methyldopate                     | Aldomet 50mg/ ml Injection (Merck Sharp & Dohme Ltd)           |
| 26919 | 125025001000027109 | Methyldopate                     | Methyldopa 50mg/ ml Injection                                  |
| 21346 | 125115001000027106 | Methyldopa / Hydrochlorothiazide | Hydromet Tablet (MSD Thomas Morson Pharmaceuticals)            |
| 28738 | 125055001000027105 | Methyldopa / Hydrochlorothiazide | Methyldopa with hydrochlorothiazide Tablet                     |
| 1707  | 318672001          | Methyldopa                       | Methyldopa 250mg tablets                                       |
| 3049  | 318671008          | Methyldopa                       | Methyldopa 125mg tablets                                       |
| 3070  | 318673006          | Methyldopa                       | Methyldopa 500mg tablets                                       |
| 7626  | 655001000027106    | Methyldopa                       | Aldomet 250mg Tablet (Merck Sharp & Dohme Ltd)                 |
| 7642  | 665001000027102    | Methyldopa                       | Aldomet 500mg Tablet (Merck Sharp & Dohme Ltd)                 |
| 8033  | 645001000027108    | Methyldopa                       | Aldomet 125mg Tablet (Merck Sharp & Dohme Ltd)                 |
| 9225  | 204605001000027101 | Methyldopa                       | Methyldopa 250mg Capsule                                       |
| 14390 | 51145001000027101  | Methyldopa                       | Aldomet 250mg/ 5ml Liquid (Merck Sharp & Dohme Ltd)            |
| 18252 | 29695001000027106  | Methyldopa                       | Metalpha 250mg Tablet (Ashbourne Pharmaceuticals Ltd)          |
| 23761 | 8667311000001100   | Methyldopa                       | Methyldopa 250mg/ 5ml oral suspension                          |
| 24196 | 54625001000027106  | Methyldopa                       | Dopamet 250mg Tablet (Berk Pharmaceuticals Ltd)                |
| 25275 | 29705001000027102  | Methyldopa                       | Metalpha 500mg Tablet (Ashbourne Pharmaceuticals Ltd)          |
| 25289 | 54635001000027108  | Methyldopa                       | Dopamet 500mg Tablet (Berk Pharmaceuticals Ltd)                |
| 29570 | 54615001000027102  | Methyldopa                       | Dopamet 125mg Tablet (Berk Pharmaceuticals Ltd)                |
| 32913 | 874511000001106    | Methyldopa                       | Methyldopa 250mg tablets (Actavis UK Ltd)                      |
| 41661 | 15965001000027104  | Methyldopa                       | Methyldopa 250mg Tablet (C P Pharmaceuticals Ltd)              |
| 43988 | 253711000001107    | Methyldopa                       | Aldomet 250mg tablets (Aspen Pharma Trading Ltd)               |
| 43989 | 73611000001108     | Methyldopa                       | Aldomet 500mg tablets (Aspen Pharma Trading Ltd)               |
| 62513 | 17204211000001105  | Methyldopa                       | Methyldopa 250mg tablets (Sovereign Medical Ltd)               |
| 71110 | 17895811000001103  | Methyldopa                       | Aldomet 500mg tablets (Sigma Pharmaceuticals Plc)              |
| 71385 | 17895611000001102  | Methyldopa                       | Aldomet 250mg tablets (Sigma Pharmaceuticals Plc)              |
| 72819 | 17940911000001101  | Methyldopa                       | Methyldopa 250mg tablets (Phoenix Healthcare Distribution Ltd) |
| 73640 | 87911000001103     | Methyldopa                       | Methyldopa 250mg tablets (Sandoz Ltd)                          |
| 77825 |                    | Methyldopa                       | Methyldopa 250mg tablets (A A H Pharmaceuticals Ltd)           |
| 10713 | 6855001000027101   | Methoserpidine                   | Decaserpyl 5mg Tablet (Roussel Laboratories Ltd)               |
| 10714 | 124465001000027102 | Methoserpidine                   | Methoserpidine 5mg Tablet                                      |
| 25393 | 6865001000027105   | Methoserpidine                   | Decaserpyl 10mg Tablet (Roussel Laboratories Ltd)              |
| 29187 | 124475001000027109 | Methoserpidine                   | Methoserpidine 10mg Tablet                                     |
| 63780 | 23707811000001104  | Macitentan                       | Macitentan 10mg tablets                                        |
| 54940 | 14696611000001108  | Ketanserin                       | Ketanserin 20mg tablets                                        |
| 2117  | 3354611000001100   | Indoramin                        | Doralese Tiltab 20mg tablets (Chemidex Pharma Ltd)             |
| 2816  | 318739007          | Indoramin                        | Indoramin 20mg tablets                                         |
| 5815  | 318740009          | Indoramin                        | Indoramin 25mg tablets                                         |
| 9019  | 118045001000027102 | Indoramin                        | Indoramin 50mg Tablet                                          |

|       |                    |                           |                                                                                    |
|-------|--------------------|---------------------------|------------------------------------------------------------------------------------|
| 11394 | 2415001000027104   | Indoramin                 | Baratol 25mg Tablet (Shire Pharmaceuticals Ltd)                                    |
| 16198 | 2425001000027108   | Indoramin                 | Baratol 50mg Tablet (Shire Pharmaceuticals Ltd)                                    |
| 40256 | 3689111000001107   | Indoramin                 | Baratol 25mg tablets (Amdipharm Plc)                                               |
| 504   | 34193811000001100  | Hydralazine               | Hydralazine 20mg powder for solution for injection ampoules                        |
| 573   | 318649003          | Hydralazine               | Hydralazine 25mg tablets                                                           |
| 1296  | 318650003          | Hydralazine               | Hydralazine 50mg tablets                                                           |
| 2362  | 657011000001101    | Hydralazine               | Apresoline 25mg tablets (AMCo)                                                     |
| 2680  | 1655001000027106   | Hydralazine               | Apresoline 50mg Tablet (Sovereign Medical Ltd)                                     |
| 13317 | 3925011000001100   | Hydralazine               | Apresoline 20mg powder for solution for injection ampoules (AMCo)                  |
| 18861 | 8528611000001105   | Hydralazine               | Hydralazine 10mg/ 5ml oral suspension                                              |
| 31220 | 193711000001103    | Hydralazine               | Hydralazine 25mg tablets (A A H Pharmaceuticals Ltd)                               |
| 41639 | 147111000001103    | Hydralazine               | Hydralazine 50mg tablets (Actavis UK Ltd)                                          |
| 43500 | 364711000001106    | Hydralazine               | Hydralazine 25mg tablets (Actavis UK Ltd)                                          |
| 59512 | 8528711000001101   | Hydralazine               | Hydralazine 50mg/ 5ml oral solution                                                |
| 61116 | 8528811000001109   | Hydralazine               | Hydralazine 50mg/ 5ml oral suspension                                              |
| 63652 | 245915001000027107 | Hydralazine               | Hydralazine Tablet                                                                 |
| 64253 | 12537811000001103  | Hydralazine               | Hydralazine 5mg/ 5ml oral suspension                                               |
| 70655 | 8581011000001103   | Hydralazine               | Hydralazine 25mg/ 5ml oral suspension                                              |
| 71097 | 19819011000001104  | Hydralazine               | Hydralazine 50mg tablets (Almus Pharmaceuticals Ltd)                               |
| 71256 | 30172911000001106  | Hydralazine               | Hydralazine 20mg powder for concentrate for solution for injection ampoules (AMCo) |
| 74749 | 414426001          | Hydralazine               | Hydralazine 10mg tablets                                                           |
| 75259 | 12536611000001104  | Hydralazine               | Hydralazine 1mg/ 5ml oral suspension                                               |
| 7922  | 15305001000027108  | Guanethidine Monosulphate | Ismelin 10mg Tablet (Sovereign Medical Ltd)                                        |
| 7923  | 189785001000027102 | Guanethidine Monosulphate | Guanethidine 10mg Tablet                                                           |
| 13379 | 15315001000027105  | Guanethidine Monosulphate | Ismelin 25mg Tablet (Sovereign Medical Ltd)                                        |
| 17291 | 189795001000027103 | Guanethidine Monosulphate | Guanethidine 25mg Tablet                                                           |
| 30127 | 15325001000027101  | Guanethidine monosulfate  | Ismelin 10mg/ ml Injection (Sovereign Medical Ltd)                                 |
| 31080 | 36053311000001103  | Guanethidine monosulfate  | Guanethidine 10mg/ 1ml solution for injection ampoules                             |
| 48189 | 4369611000001106   | Guanethidine monosulfate  | Ismelin 10mg/ 1ml solution for injection ampoules (Amdipharm Plc)                  |
| 119   | 318781001          | Doxazosin mesilate        | Doxazosin 1mg tablets                                                              |
| 493   | 318782008          | Doxazosin mesilate        | Doxazosin 2mg tablets                                                              |
| 582   | 134456001          | Doxazosin mesilate        | Doxazosin 4mg modified-release tablets                                             |
| 755   | 123911000001106    | Doxazosin mesilate        | Cardura XL 4mg tablets (Pfizer Ltd)                                                |
| 1294  | 318783003          | Doxazosin mesilate        | Doxazosin 4mg tablets                                                              |
| 4449  | 907711000001109    | Doxazosin mesilate        | Cardura 1mg tablets (Pfizer Ltd)                                                   |
| 4802  | 41811000001109     | Doxazosin mesilate        | Cardura 2mg tablets (Pfizer Ltd)                                                   |
| 5496  | 135921004          | Doxazosin mesilate        | Doxazosin 8mg modified-release tablets                                             |
| 5618  | 873411000001109    | Doxazosin mesilate        | Cardura XL 8mg tablets (Pfizer Ltd)                                                |
| 7547  | 4857711000001103   | Doxazosin mesilate        | Doxadura 2mg tablets (Discovery Pharmaceuticals)                                   |
| 7549  | 4857511000001108   | Doxazosin mesilate        | Doxadura 1mg tablets (Discovery Pharmaceuticals)                                   |
| 8086  | 159565001000027104 | Doxazosin mesilate        | Cardura 4mg Tablet (Pfizer Ltd)                                                    |
| 10088 | 4858111000001103   | Doxazosin mesilate        | Doxadura 4mg tablets (Discovery Pharmaceuticals)                                   |
| 19193 | 481211000001106    | Doxazosin mesilate        | Doxazosin 2mg tablets (Teva UK Ltd)                                                |

|       |                    |                    |                                                                |
|-------|--------------------|--------------------|----------------------------------------------------------------|
| 19216 | 525011000001104    | Doxazosin mesilate | Doxazosin 4mg tablets (IVAX Pharmaceuticals UK Ltd)            |
| 20369 | 8483411000001101   | Doxazosin mesilate | Doxazosin 1mg/ 5ml oral suspension                             |
| 25487 | 904511000001107    | Doxazosin mesilate | Cascor 2mg tablets (Ranbaxy (UK) Ltd)                          |
| 25551 | 179311000001107    | Doxazosin mesilate | Cascor 4mg tablets (Ranbaxy (UK) Ltd)                          |
| 33094 | 674011000001107    | Doxazosin mesilate | Doxazosin 2mg tablets (Mylan)                                  |
| 34342 | 647711000001101    | Doxazosin mesilate | Doxazosin 1mg tablets (Teva UK Ltd)                            |
| 34553 | 221311000001106    | Doxazosin mesilate | Doxazosin 4mg tablets (Mylan)                                  |
| 34601 | 565111000001107    | Doxazosin mesilate | Doxazosin 1mg tablets (Mylan)                                  |
| 34625 | 554711000001100    | Doxazosin mesilate | Doxazosin 2mg tablets (A A H Pharmaceuticals Ltd)              |
| 34715 | 228711000001100    | Doxazosin mesilate | Doxazosin 1mg tablets (A A H Pharmaceuticals Ltd)              |
| 35272 | 11269911000001101  | Doxazosin mesilate | Doxadura XL 4mg tablets (Discovery Pharmaceuticals)            |
| 35603 | 8483511000001102   | Doxazosin mesilate | Doxazosin 4mg/ 5ml oral suspension                             |
| 36023 | 244615001000027103 | Doxazosin mesilate | Cardozin xl 4mg Tablet (Hillcross Pharmaceuticals Ltd)         |
| 36740 | 11098311000001104  | Doxazosin mesilate | Slocinx XL 4mg tablets (Zentiva)                               |
| 37243 | 248505001000027109 | Doxazosin mesilate | Cardozin xl 4mg Tablet (Teva UK Ltd)                           |
| 38461 | 11752411000001104  | Doxazosin mesilate | Cardozin XL 4mg tablets (Arrow Generics Ltd)                   |
| 40678 | 653011000001107    | Doxazosin mesilate | Doxazosin 4mg tablets (Teva UK Ltd)                            |
| 40891 | 840911000001105    | Doxazosin mesilate | Doxazosin 2mg tablets (IVAX Pharmaceuticals UK Ltd)            |
| 41543 | 854611000001108    | Doxazosin mesilate | Doxazosin 1mg tablets (IVAX Pharmaceuticals UK Ltd)            |
| 43695 | 11757711000001107  | Doxazosin mesilate | Colixil XL 4mg tablets (Sandoz Ltd)                            |
| 45040 | 17338211000001104  | Doxazosin mesilate | Larbex XL 4mg tablets (Teva UK Ltd)                            |
| 45265 | 198435001000027102 | Doxazosin mesilate | Doxazosin sr 4mg Tablet (Generics (UK) Ltd)                    |
| 45328 | 462611000001100    | Doxazosin mesilate | Doxazosin 1mg tablets (Sandoz Ltd)                             |
| 45342 | 761311000001108    | Doxazosin mesilate | Doxazosin 4mg tablets (Sandoz Ltd)                             |
| 45583 | 11554711000001104  | Doxazosin mesilate | Doxazosin 2mg tablets (Dexcel-Pharma Ltd)                      |
| 46066 | 18197411000001107  | Doxazosin mesilate | Cardozin XL 4mg tablets (Almus Pharmaceuticals Ltd)            |
| 46526 | 18164911000001108  | Doxazosin mesilate | Raporsin XL 4mg tablets (Actavis UK Ltd)                       |
| 47807 | 203155001000027108 | Doxazosin mesilate | Doxazosin xl 4mg Tablet (Hillcross Pharmaceuticals Ltd)        |
| 48150 | 4250111000001105   | Doxazosin mesilate | Doxazosin 1mg tablets (Actavis UK Ltd)                         |
| 50467 | 430311000001102    | Doxazosin mesilate | Doxazosin 2mg tablets (Alliance Healthcare (Distribution) Ltd) |
| 51685 | 4250511000001101   | Doxazosin mesilate | Doxazosin 4mg tablets (Actavis UK Ltd)                         |
| 53033 | 13811611000001108  | Doxazosin mesilate | Doxzogen XL 4mg tablets (Mylan)                                |
| 53322 | 16050211000001103  | Doxazosin mesilate | Doxazosin 4mg tablets (Bristol Laboratories Ltd)               |
| 54785 | 19730511000001106  | Doxazosin mesilate | Doxazosin 4mg tablets (Medreich Plc)                           |
| 55906 | 11554511000001109  | Doxazosin mesilate | Doxazosin 1mg tablets (Dexcel-Pharma Ltd)                      |
| 55916 | 870611000001103    | Doxazosin mesilate | Doxazosin 1mg tablets (Alliance Healthcare (Distribution) Ltd) |
| 56145 | 4250311000001107   | Doxazosin mesilate | Doxazosin 2mg tablets (Actavis UK Ltd)                         |
| 57074 | 15083011000001109  | Doxazosin mesilate | Doxazosin 2mg tablets (Sigma Pharmaceuticals Plc)              |
| 57448 | 588211000001106    | Doxazosin mesilate | Doxazosin 4mg tablets (A A H Pharmaceuticals Ltd)              |
| 57784 | 12083611000001104  | Doxazosin mesilate | Doxazosin 2mg/ 5ml oral suspension                             |
| 58276 | 19730311000001100  | Doxazosin mesilate | Doxazosin 2mg tablets (Medreich Plc)                           |
| 58325 | 17894411000001101  | Doxazosin mesilate | Doxazosin 4mg tablets (Phoenix Healthcare Distribution Ltd)    |
| 59209 | 252111000001100    | Doxazosin mesilate | Doxazosin 1mg tablets (Kent Pharmaceuticals Ltd)               |

|       |                    |                       |                                                                         |
|-------|--------------------|-----------------------|-------------------------------------------------------------------------|
| 59862 | 11554911000001102  | Doxazosin mesilate    | Doxazosin 4mg tablets (Dexcel-Pharma Ltd)                               |
| 60200 | 23970811000001104  | Doxazosin mesilate    | Doxazosin 4mg tablets (DE Pharmaceuticals)                              |
| 60319 | 16049611000001105  | Doxazosin mesilate    | Doxazosin 1mg tablets (Bristol Laboratories Ltd)                        |
| 61066 | 16049911000001104  | Doxazosin mesilate    | Doxazosin 2mg tablets (Bristol Laboratories Ltd)                        |
| 61123 | 23466611000001105  | Doxazosin mesilate    | Doxazosin 4mg/ 5ml oral solution                                        |
| 61283 | 578111000001109    | Doxazosin mesilate    | Doxazosin 4mg tablets (Alliance Healthcare (Distribution) Ltd)          |
| 62019 | 9792611000001102   | Doxazosin mesilate    | Doxazosin 1mg tablets (Almus Pharmaceuticals Ltd)                       |
| 62158 | 9793211000001105   | Doxazosin mesilate    | Doxazosin 4mg tablets (Almus Pharmaceuticals Ltd)                       |
| 62351 | 17894211000001100  | Doxazosin mesilate    | Doxazosin 2mg tablets (Phoenix Healthcare Distribution Ltd)             |
| 63158 | 9792911000001108   | Doxazosin mesilate    | Doxazosin 2mg tablets (Almus Pharmaceuticals Ltd)                       |
| 63314 | 17198011000001109  | Doxazosin mesilate    | Doxazosin 1mg tablets (Sovereign Medical Ltd)                           |
| 64233 | 23591811000001109  | Doxazosin mesilate    | Doxazosin 1mg tablets (Waymade Healthcare Plc)                          |
| 65159 | 23592211000001101  | Doxazosin mesilate    | Doxazosin 4mg tablets (Waymade Healthcare Plc)                          |
| 65853 | 30122411000001102  | Doxazosin mesilate    | Doxazosin 1mg tablets (Mawdsley-Brooks & Company Ltd)                   |
| 66065 | 225411000001101    | Doxazosin mesilate    | Doxazosin 2mg tablets (Kent Pharmaceuticals Ltd)                        |
| 68022 | 17198511000001101  | Doxazosin mesilate    | Doxazosin 4mg tablets (Sovereign Medical Ltd)                           |
| 68161 | 30123811000001108  | Doxazosin mesilate    | Doxazosin 4mg tablets (Mawdsley-Brooks & Company Ltd)                   |
| 69319 | 23970611000001103  | Doxazosin mesilate    | Doxazosin 2mg tablets (DE Pharmaceuticals)                              |
| 69757 | 12084811000001102  | Doxazosin mesilate    | Doxazosin 8mg/ 5ml oral suspension                                      |
| 71405 | 13846611000001108  | Doxazosin mesilate    | Cardura XL 4mg tablets (DE Pharmaceuticals)                             |
| 72346 | 12083511000001103  | Doxazosin mesilate    | Doxazosin 2mg/ 5ml oral solution                                        |
| 72348 | 24509711000001103  | Doxazosin mesilate    | Doxazosin 1mg/ 5ml oral solution                                        |
| 73116 | 17198311000001107  | Doxazosin mesilate    | Doxazosin 2mg tablets (Sovereign Medical Ltd)                           |
| 73637 | 4469911000001108   | Doxazosin mesilate    | Doxazosin 1mg tablets (Sterwin Medicines)                               |
| 74000 | 5346711000001108   | Doxazosin mesilate    | Cardura XL 4mg tablets (Waymade Healthcare Plc)                         |
| 74567 | 421069003          | Doxazosin mesilate    | Doxazosin 8mg tablets                                                   |
| 74831 | 15083211000001104  | Doxazosin mesilate    | Doxazosin 4mg tablets (Sigma Pharmaceuticals Plc)                       |
| 76149 |                    | Doxazosin mesilate    | Doxazosin 5mg/ 5ml oral suspension                                      |
| 77362 |                    | Doxazosin mesilate    | Cardura 2mg tablets (Sigma Pharmaceuticals Plc)                         |
| 77436 |                    | Doxazosin mesilate    | Cardura XL 4mg tablets (Mawdsley-Brooks & Company Ltd)                  |
| 4374  | 108525001000027101 | Debrisoquine Sulphate | Debrisoquine 20mg tablets                                               |
| 8342  | 6915001000027102   | Debrisoquine Sulphate | Declinax 20mg Tablet (Roche Products Ltd)                               |
| 4375  | 318724006          | Debrisoquine sulfate  | Debrisoquine 10mg tablets                                               |
| 7911  | 6905001000027104   | Debrisoquine sulfate  | Declinax 10mg Tablet (Roche Products Ltd)                               |
| 338   | 322840006          | Clonidine             | Clonidine 25microgram tablets                                           |
| 2630  | 344511000001105    | Clonidine             | Dixarit 25microgram tablets (Boehringer Ingelheim Ltd)                  |
| 2878  | 318667005          | Clonidine             | Clonidine 100microgram tablets                                          |
| 4215  | 215111000001101    | Clonidine             | Catapres 100microgram tablets (Boehringer Ingelheim Ltd)                |
| 5289  | 36089511000001100  | Clonidine             | Clonidine 250microgram modified-release capsules                        |
| 6694  | 318668000          | Clonidine             | Clonidine 300microgram tablets                                          |
| 8296  | 4536811000001109   | Clonidine             | Catapres PL Perlongets 250microgram capsules (Boehringer Ingelheim Ltd) |
| 16248 | 36089211000001103  | Clonidine             | Clonidine 150micrograms/ 1ml solution for injection ampoules            |
| 23380 | 368711000001103    | Clonidine             | Catapres 300microgram tablets (Boehringer Ingelheim Ltd)                |

|       |                    |                      |                                                                                        |
|-------|--------------------|----------------------|----------------------------------------------------------------------------------------|
| 30293 | 364911000001108    | Clonidine            | Catapres 150micrograms/ 1ml solution for injection ampoules (Boehringer Ingelheim Ltd) |
| 33093 | 3963611000001104   | Clonidine            | Clonidine 25microgram tablets (Sandoz Ltd)                                             |
| 45578 | 4920211000001104   | Clonidine            | Clonidine 25microgram tablets (A A H Pharmaceuticals Ltd)                              |
| 49684 | 10448511000001104  | Clonidine            | Clonidine 100micrograms/ 24hours transdermal patches                                   |
| 52555 | 8398511000001100   | Clonidine            | Clonidine 50micrograms/ 5ml oral solution                                              |
| 53142 | 8398611000001101   | Clonidine            | Clonidine 50micrograms/ 5ml oral suspension                                            |
| 54467 | 10449111000001101  | Clonidine            | Clonidine 300micrograms/ 24hours transdermal patches                                   |
| 55797 | 8398311000001106   | Clonidine            | Clonidine 25micrograms/ 5ml oral solution                                              |
| 58090 | 11814111000001107  | Clonidine            | Clonidine 75micrograms/ 5ml oral solution                                              |
| 58529 | 7660211000001104   | Clonidine            | Clonidine 200micrograms/ 24hours transdermal patches                                   |
| 60089 | 21922811000001105  | Clonidine            | Clonidine 25microgram tablets (Waymade Healthcare Plc)                                 |
| 60136 | 11812911000001101  | Clonidine            | Clonidine 100micrograms/ 5ml oral solution                                             |
| 61256 | 8426311000001108   | Clonidine            | Clonidine 5micrograms/ 5ml oral suspension                                             |
| 61710 | 18402811000001107  | Clonidine            | Clonidine 25microgram tablets (Teva UK Ltd)                                            |
| 63971 | 15077611000001101  | Clonidine            | Clonidine 25microgram tablets (Sigma Pharmaceuticals Plc)                              |
| 64284 | 16159511000001104  | Clonidine            | Dixarit 25microgram tablets (Lexon (UK) Ltd)                                           |
| 67200 | 8397911000001106   | Clonidine            | Clonidine 10micrograms/ 5ml oral solution                                              |
| 72130 | 11813011000001109  | Clonidine            | Clonidine 100micrograms/ 5ml oral suspension                                           |
| 72227 | 13867511000001104  | Clonidine            | Dixarit 25microgram tablets (DE Pharmaceuticals)                                       |
| 72807 | 11813311000001107  | Clonidine            | Clonidine 15micrograms/ 5ml oral solution                                              |
| 74534 | 32392011000001103  | Clonidine            | Clonidine 250micrograms/ 5ml oral suspension                                           |
| 75207 | 36392711000001102  | Clonidine            | Clonidine 50micrograms/ 5ml oral solution sugar free                                   |
| 76766 |                    | Clonidine            | Catapres TTS 3 patches (Imported (Germany))                                            |
| 77591 |                    | Clonidine            | Clonidine 12.5micrograms/ 5ml oral suspension                                          |
| 29560 | 407815004          | Bosentan monohydrate | Bosentan 62.5mg tablets                                                                |
| 29561 | 407816003          | Bosentan monohydrate | Bosentan 125mg tablets                                                                 |
| 47654 | 4765211000001107   | Bosentan monohydrate | Tracleer 62.5mg tablets (Actelion Pharmaceuticals UK Ltd)                              |
| 58632 | 4765711000001100   | Bosentan monohydrate | Tracleer 125mg tablets (Actelion Pharmaceuticals UK Ltd)                               |
| 10879 | 122435001000027102 | Betanidine Sulphate  | Bethanidine sulphate 10mg tablets                                                      |
| 14442 | 10505001000027103  | Betanidine Sulphate  | Esbatal 50mg Tablet (Wellcome Medical Division)                                        |
| 18247 | 10495001000027109  | Betanidine Sulphate  | Esbatal 10mg Tablet (Wellcome Medical Division)                                        |
| 28676 | 122445001000027101 | Betanidine Sulphate  | Bethanidine sulphate 50mg tablets                                                      |
| 29443 | 122475001000027100 | Betanidine Sulphate  | Bendogen 10mg Tablet (Lagap)                                                           |
| 40421 | 122485001000027105 | Betanidine Sulphate  | Bendogen 50mg Tablet (Lagap)                                                           |
| 40527 | 428480001          | Ambrisentan          | Ambrisentan 10mg tablets                                                               |
| 40528 | 429662009          | Ambrisentan          | Ambrisentan 5mg tablets                                                                |
| 214   | 168745001000027105 |                      | HYDRALAZINE 1 MG SYR                                                                   |
| 445   | 4078311000001100   |                      | Prazosin 1mg tablets and Prazosin 500microgram tablets                                 |
| 2649  | 70895001000027105  |                      | METHYLDOPA 250 MG CAP                                                                  |
| 4507  | 145525001000027109 |                      | HYDRALAZINE 12.5 MG TAB                                                                |
| 19635 |                    |                      | DIXARIT                                                                                |
| 20808 |                    |                      | CATAPRES PERLONGETS                                                                    |
| 21749 | 168685001000027105 |                      | HYDRALAZINE 100 MG TAB                                                                 |

|                      |                    |                 |                                                                                              |
|----------------------|--------------------|-----------------|----------------------------------------------------------------------------------------------|
| 23746                | 179545001000027108 |                 | HYDRALAZINE 10 MG TAB                                                                        |
| 25088                |                    |                 | CATAPRES                                                                                     |
| 25836                | 141085001000027104 |                 | METHYLDOPA 200 MG TAB                                                                        |
| 27894                |                    |                 | CLONIDINE                                                                                    |
| 28790                |                    |                 | CATAPRES                                                                                     |
| 31971                | 145575001000027108 |                 | HYDRALAZINE 6.25 MG SYR                                                                      |
| <b>Beta-blockers</b> |                    |                 |                                                                                              |
| 7852                 | 51195001000027109  | Timolol maleate | Blocadren 10mg Tablet (Merck Sharp & Dohme Ltd)                                              |
| 7853                 | 318534000          | Timolol maleate | Timolol 10mg tablets                                                                         |
| 12037                | 3315001000027104   | Timolol maleate | Betim 10mg Tablet (ICN Pharmaceuticals France S.A.)                                          |
| 29610                | 72811000001104     | Timolol maleate | Betim 10mg tablets (Meda Pharmaceuticals Ltd)                                                |
| 786                  | 318525005          | Sotalol         | Sotalol 40mg tablets                                                                         |
| 1572                 | 318526006          | Sotalol         | Sotalol 80mg tablets                                                                         |
| 4004                 | 463811000001109    | Sotalol         | Sotacor 80mg tablets (Bristol-Myers Squibb Pharmaceuticals Ltd)                              |
| 5858                 | 900511000001103    | Sotalol         | Beta-Cardone 40mg tablets (Focus Pharmaceuticals Ltd)                                        |
| 6751                 | 104011000001101    | Sotalol         | Beta-Cardone 80mg tablets (Focus Pharmaceuticals Ltd)                                        |
| 9292                 | 318528007          | Sotalol         | Sotalol 160mg tablets                                                                        |
| 11380                | 446211000001108    | Sotalol         | Sotacor 160mg tablets (Bristol-Myers Squibb Pharmaceuticals Ltd)                             |
| 13051                | 318527002          | Sotalol         | Sotalol 200mg tablets                                                                        |
| 13487                | 447111000001104    | Sotalol         | Beta-Cardone 200mg tablets (Focus Pharmaceuticals Ltd)                                       |
| 17679                | 141245001000027103 | Sotalol         | Sotalol 10mg/ ml injection                                                                   |
| 24635                | 141365001000027103 | Sotalol         | Sotacor 10mg/ ml Injection (Bristol-Myers Squibb Pharmaceuticals Ltd)                        |
| 27727                | 141255001000027100 | Sotalol         | Sotalol 2mg/ ml injection                                                                    |
| 33578                | 694711000001100    | Sotalol         | Sotacor 40mg/ 4ml solution for injection ampoules (Bristol-Myers Squibb Pharmaceuticals Ltd) |
| 34371                | 936211000001109    | Sotalol         | Sotalol 40mg tablets (A A H Pharmaceuticals Ltd)                                             |
| 34520                | 680311000001106    | Sotalol         | Sotalol 80mg tablets (Mylan)                                                                 |
| 34600                | 3659211000001106   | Sotalol         | Sotalol 40mg tablets (Teva UK Ltd)                                                           |
| 34640                | 89165001000027103  | Sotalol         | Sotalol 40mg Tablet (Tillomed Laboratories Ltd)                                              |
| 34690                | 170011000001101    | Sotalol         | Sotalol 80mg tablets (Sandoz Ltd)                                                            |
| 35710                | 8726911000001102   | Sotalol         | Sotalol 25mg/ 5ml oral suspension                                                            |
| 38498                | 35930811000001109  | Sotalol         | Sotalol 40mg/ 4ml solution for injection ampoules                                            |
| 39423                | 909811000001109    | Sotalol         | Sotalol 80mg tablets (A A H Pharmaceuticals Ltd)                                             |
| 43549                | 4230411000001104   | Sotalol         | Sotalol 40mg tablets (IVAX Pharmaceuticals UK Ltd)                                           |
| 51492                | 8726811000001107   | Sotalol         | Sotalol 25mg/ 5ml oral solution                                                              |
| 70161                | 8727111000001102   | Sotalol         | Sotalol 40mg/ 5ml oral solution                                                              |
| 70162                | 8727211000001108   | Sotalol         | Sotalol 40mg/ 5ml oral suspension                                                            |
| 70734                | 11427411000001105  | Sotalol         | Sotalol 40mg tablets (Almus Pharmaceuticals Ltd)                                             |
| 71479                | 16067611000001105  | Sotalol         | Sotalol 40mg tablets (Bristol Laboratories Ltd)                                              |
| 72347                | 8727511000001106   | Sotalol         | Sotalol 80mg/ 5ml oral suspension                                                            |
| 73481                | 3658411000001102   | Sotalol         | Sotalol 160mg tablets (Teva UK Ltd)                                                          |
| 74628                | 3659411000001105   | Sotalol         | Sotalol 80mg tablets (Teva UK Ltd)                                                           |
| 74829                | 17799811000001102  | Sotalol         | Sotalol 40mg tablets (Phoenix Healthcare Distribution Ltd)                                   |

|       |                    |             |                                                                                |
|-------|--------------------|-------------|--------------------------------------------------------------------------------|
| 75060 | 243155001000027107 | Sotalol     | Sotalol oral solution                                                          |
| 75821 |                    | Sotalol     | Sotalol 40mg tablets (Alliance Healthcare (Distribution) Ltd)                  |
| 220   | 89655001000027106  | Propranolol | Propranolol 5mg/ 5ml oral solution                                             |
| 297   | 318352004          | Propranolol | Propranolol 10mg tablets                                                       |
| 707   | 318353009          | Propranolol | Propranolol 40mg tablets                                                       |
| 769   | 318407001          | Propranolol | Propranolol 80mg modified-release capsules                                     |
| 940   | 318354003          | Propranolol | Propranolol 80mg tablets                                                       |
| 1006  | 226211000001106    | Propranolol | Half Inderal LA 80mg capsules (AstraZeneca UK Ltd)                             |
| 1048  | 821011000001100    | Propranolol | Inderal 80mg tablets (AstraZeneca UK Ltd)                                      |
| 1050  | 930211000001107    | Propranolol | Inderal 40mg tablets (AstraZeneca UK Ltd)                                      |
| 1448  | 318406005          | Propranolol | Propranolol 160mg modified-release capsules                                    |
| 2414  | 567911000001100    | Propranolol | Inderal 10mg tablets (AstraZeneca UK Ltd)                                      |
| 3005  | 154311000001108    | Propranolol | Inderal LA 160mg capsules (AstraZeneca UK Ltd)                                 |
| 3087  | 15356211000001102  | Propranolol | Propranolol 40mg/ 5ml oral solution sugar free                                 |
| 3167  | 318355002          | Propranolol | Propranolol 160mg tablets                                                      |
| 3827  | 121565001000027103 | Propranolol | Propanix 40mg Tablet (Ashbourne Pharmaceuticals Ltd)                           |
| 5478  | 35932311000001101  | Propranolol | Propranolol 10mg/ 5ml oral solution sugar free                                 |
| 8331  | 51875001000027109  | Propranolol | Inderal 160mg Tablet (AstraZeneca UK Ltd)                                      |
| 8978  | 120695001000027100 | Propranolol | Propanix 160mg Modified-release capsule (Ashbourne Pharmaceuticals Ltd)        |
| 9185  | 196405001000027103 | Propranolol | Propranolol 80mg/ 5ml oral solution                                            |
| 10294 | 4371111000001106   | Propranolol | Inderal 1mg/ 1ml solution for injection ampoules (AstraZeneca UK Ltd)          |
| 11711 | 196395001000027106 | Propranolol | Propranolol 50mg/ 5ml oral solution                                            |
| 12495 | 54385001000027105  | Propranolol | Berkolol 10mg Tablet (Berk Pharmaceuticals Ltd)                                |
| 14552 | 121555001000027107 | Propranolol | Propanix 10mg Tablet (Ashbourne Pharmaceuticals Ltd)                           |
| 14808 | 573711000001104    | Propranolol | Bedranol SR 80mg capsules (Sandoz Ltd)                                         |
| 15619 | 72255001000027102  | Propranolol | Half-betadur cr 80mg Capsule (Monmouth Pharmaceuticals Ltd)                    |
| 17082 | 295911000001102    | Propranolol | Syprol 5mg/ 5ml oral solution (Rosemont Pharmaceuticals Ltd)                   |
| 20468 | 724111000001103    | Propranolol | Half Beta-Prograne 80mg modified-release capsules (Tillomed Laboratories Ltd)  |
| 21838 | 121575001000027105 | Propranolol | Propanix 80mg Tablet (Ashbourne Pharmaceuticals Ltd)                           |
| 21839 | 54405001000027101  | Propranolol | Berkolol 80mg Tablet (Berk Pharmaceuticals Ltd)                                |
| 21866 | 54395001000027109  | Propranolol | Berkolol 40mg Tablet (Berk Pharmaceuticals Ltd)                                |
| 22208 | 227945001000027104 | Propranolol | Half propanix la 80mg Modified-release capsule (Ashbourne Pharmaceuticals Ltd) |
| 23326 | 175605001000027100 | Propranolol | Betadur cr 160mg Modified-release capsule (Monmouth Pharmaceuticals Ltd)       |
| 23587 | 138495001000027100 | Propranolol | Sloprolol 160mg Capsule (C P Pharmaceuticals Ltd)                              |
| 24218 | 54445001000027106  | Propranolol | Berkolol 160mg Tablet (Berk Pharmaceuticals Ltd)                               |
| 25359 | 2899211000001100   | Propranolol | Rapranol SR 160mg capsules (Ranbaxy (UK) Ltd)                                  |
| 25367 | 2899011000001105   | Propranolol | Rapranol SR 80mg capsules (Ranbaxy (UK) Ltd)                                   |
| 26228 | 231365001000027104 | Propranolol | Propanix LA 160mg Modified-release capsule (Ashbourne Pharmaceuticals Ltd)     |
| 26229 | 510611000001108    | Propranolol | Beta-Prograne 160mg modified-release capsules (Tillomed Laboratories Ltd)      |
| 26255 | 207165001000027106 | Propranolol | Lopranol la 160mg Capsule (Opus Pharmaceuticals Ltd)                           |
| 26895 | 28711000001109     | Propranolol | Syprol 10mg/ 5ml oral solution (Rosemont Pharmaceuticals Ltd)                  |
| 27486 | 35932611000001106  | Propranolol | Propranolol 1mg/ 1ml solution for injection ampoules                           |
| 27700 | 92011000001103     | Propranolol | Propranolol 40mg tablets (Actavis UK Ltd)                                      |

|       |                    |             |                                                                                   |
|-------|--------------------|-------------|-----------------------------------------------------------------------------------|
| 27964 | 75515001000027103  | Propranolol | Apsolol 40mg Tablet (Approved Prescription Services Ltd)                          |
| 28048 | 90305001000027107  | Propranolol | Angilol 10mg Tablet (DDSA Pharmaceuticals Ltd)                                    |
| 28128 | 49655001000027103  | Propranolol | Propranolol 80mg Modified-release capsule (Actavis UK Ltd)                        |
| 28788 | 232405001000027109 | Propranolol | Half propatard la 80mg Modified-release capsule (Galen Ltd)                       |
| 28996 | 549611000001106    | Propranolol | Bedranol SR 160mg capsules (Sandoz Ltd)                                           |
| 29763 | 120685001000027104 | Propranolol | Propanix 160mg Tablet (Ashbourne Pharmaceuticals Ltd)                             |
| 31214 | 694511000001105    | Propranolol | Propranolol 80mg tablets (Mylan)                                                  |
| 31776 | 23611000001107     | Propranolol | Propranolol 40mg tablets (Mylan)                                                  |
| 31833 | 90325001000027100  | Propranolol | Angilol 80mg Tablet (DDSA Pharmaceuticals Ltd)                                    |
| 32162 | 90295001000027100  | Propranolol | Propranolol 80mg Modified-release capsule (Lagap)                                 |
| 33376 | 208225001000027105 | Propranolol | Probeta LA 160mg Capsule (Trinity Pharmaceuticals Ltd)                            |
| 33602 | 240711000001100    | Propranolol | Slo-Pro 160mg capsules (Mylan)                                                    |
| 33644 | 763811000001100    | Propranolol | Propranolol 80mg tablets (A A H Pharmaceuticals Ltd)                              |
| 33836 | 75555001000027108  | Propranolol | Apsolol 160mg Tablet (Approved Prescription Services Ltd)                         |
| 34185 | 65085001000027102  | Propranolol | Propranolol LA 80mg Modified-release capsule (Approved Prescription Services Ltd) |
| 34208 | 30275001000027102  | Propranolol | Propranolol SR 160mg Modified-release capsule (C P Pharmaceuticals Ltd)           |
| 34214 | 696011000001107    | Propranolol | Propranolol 160mg tablets (Actavis UK Ltd)                                        |
| 34378 | 695911000001104    | Propranolol | Propranolol 10mg tablets (A A H Pharmaceuticals Ltd)                              |
| 34783 | 98911000001101     | Propranolol | Propranolol 10mg tablets (Actavis UK Ltd)                                         |
| 34804 | 212711000001109    | Propranolol | Propranolol 10mg tablets (Teva UK Ltd)                                            |
| 34867 | 63965001000027101  | Propranolol | Propranolol 80mg Capsule (IVAX Pharmaceuticals UK Ltd)                            |
| 34868 | 859211000001105    | Propranolol | Propranolol 40mg tablets (Teva UK Ltd)                                            |
| 34884 | 141395001000027101 | Propranolol | Propranolol 160mg Modified-release capsule (Sandoz Ltd)                           |
| 34945 | 90285001000027104  | Propranolol | Propranolol 160mg Modified-release capsule (Lagap)                                |
| 34949 | 49665001000027107  | Propranolol | Propranolol 160mg Modified-release capsule (Actavis UK Ltd)                       |
| 35938 | 168311000001107    | Propranolol | Propranolol 80mg modified-release capsules (A A H Pharmaceuticals Ltd)            |
| 36576 | 397911000001104    | Propranolol | Propranolol 10mg tablets (Mylan)                                                  |
| 36603 | 22555001000027104  | Propranolol | Propranolol SR 160mg Modified-release capsule (Hillcross Pharmaceuticals Ltd)     |
| 38433 | 60395001000027107  | Propranolol | Propranolol 50mg/ 5ml Oral solution (Rosemont Pharmaceuticals Ltd)                |
| 39233 | 8393911000001102   | Propranolol | Propranolol 80mg modified-release capsules (Teva UK Ltd)                          |
| 40241 | 65075001000027107  | Propranolol | Propranolol LA 160mg Capsule (Approved Prescription Services Ltd)                 |
| 41555 | 188311000001109    | Propranolol | Propranolol 40mg tablets (A A H Pharmaceuticals Ltd)                              |
| 42152 | 823311000001101    | Propranolol | Syrol 50mg/ 5ml oral solution (Rosemont Pharmaceuticals Ltd)                      |
| 43525 | 395011000001105    | Propranolol | Propranolol 10mg tablets (IVAX Pharmaceuticals UK Ltd)                            |
| 45297 | 502911000001101    | Propranolol | Propranolol 40mg tablets (IVAX Pharmaceuticals UK Ltd)                            |
| 45343 | 30285001000027107  | Propranolol | Propranolol SR 80mg Modified-release capsule (C P Pharmaceuticals Ltd)            |
| 45494 | 9808311000001105   | Propranolol | Propranolol 10mg tablets (Almus Pharmaceuticals Ltd)                              |
| 45765 | 15307311000001100  | Propranolol | Syrol 40mg/ 5ml oral solution (Rosemont Pharmaceuticals Ltd)                      |
| 45877 | 15610411000001104  | Propranolol | Beta-Prograne 160mg modified-release capsules (Teva UK Ltd)                       |
| 46363 | 15610611000001101  | Propranolol | Half Beta-Prograne 80mg modified-release capsules (Teva UK Ltd)                   |
| 47543 | 18069311000001100  | Propranolol | Half Beta-Prograne 80mg modified-release capsules (Actavis UK Ltd)                |
| 47833 | 18694811000001101  | Propranolol | Bedranol SR 80mg capsules (Almus Pharmaceuticals Ltd)                             |
| 47907 | 18695311000001109  | Propranolol | Bedranol SR 160mg capsules (Almus Pharmaceuticals Ltd)                            |



|       |                    |             |                                                                                  |
|-------|--------------------|-------------|----------------------------------------------------------------------------------|
| 48682 | 35932711000001102  | Propranolol | Propranolol 50mg/ 5ml oral solution sugar free                                   |
| 49863 | 35932811000001105  | Propranolol | Propranolol 5mg/ 5ml oral solution sugar free                                    |
| 52136 | 160775001000027108 | Propranolol | Bedranol sr 160mg Capsule (Lagap)                                                |
| 52609 | 14252111000001108  | Propranolol | Inderal LA 160mg capsules (Sigma Pharmaceuticals Plc)                            |
| 52777 | 587411000001106    | Propranolol | Propranolol 40mg tablets (Kent Pharmaceuticals Ltd)                              |
| 53177 | 244465001000027101 | Propranolol | Propranolol oral solution                                                        |
| 54297 | 13199511000001100  | Propranolol | Propranolol 50mg/ 5ml oral solution                                              |
| 54623 | 18069011000001103  | Propranolol | Beta-Prograne 160mg modified-release capsules (Actavis UK Ltd)                   |
| 55228 | 14782911000001107  | Propranolol | Propranolol 40mg tablets (Boston Healthcare Ltd)                                 |
| 55416 | 9808611000001100   | Propranolol | Propranolol 40mg tablets (Almus Pharmaceuticals Ltd)                             |
| 55849 | 582811000001105    | Propranolol | Propranolol 160mg tablets (Mylan)                                                |
| 55949 | 8672711000001106   | Propranolol | Propranolol 40mg/ 5ml oral solution                                              |
| 56173 | 18069311000001100  | Propranolol | Half Beta-Prograne 80mg modified-release capsules (Actavis UK Ltd)               |
| 56764 | 21870611000001101  | Propranolol | Propranolol 40mg tablets (Waymade Healthcare Plc)                                |
| 57063 | 18694811000001101  | Propranolol | Bedranol SR 80mg capsules (Almus Pharmaceuticals Ltd)                            |
| 57342 | 17919711000001101  | Propranolol | Propranolol 40mg tablets (Phoenix Healthcare Distribution Ltd)                   |
| 57567 | 13160911000001104  | Propranolol | Propranolol 10mg/ 5ml oral suspension                                            |
| 58297 | 163111000001101    | Propranolol | Propranolol 10mg tablets (Kent Pharmaceuticals Ltd)                              |
| 58407 | 59811000001107     | Propranolol | Propranolol 80mg tablets (Teva UK Ltd)                                           |
| 58491 | 316911000001101    | Propranolol | Propranolol 40mg tablets (Alliance Healthcare (Distribution) Ltd)                |
| 59415 | 23489711000001109  | Propranolol | Propranolol 40mg tablets (Accord Healthcare Ltd)                                 |
| 59597 | 4577511000001105   | Propranolol | Propranolol 160mg modified-release capsules (A A H Pharmaceuticals Ltd)          |
| 60565 | 9153911000001101   | Propranolol | Propranolol 40mg tablets (Ranbaxy (UK) Ltd)                                      |
| 60934 | 388811000001109    | Propranolol | Propranolol 80mg modified-release capsules (Kent Pharmaceuticals Ltd)            |
| 61727 | 23489111000001108  | Propranolol | Propranolol 10mg tablets (Accord Healthcare Ltd)                                 |
| 62711 | 23601111000001107  | Propranolol | Propranolol 80mg modified-release capsules (Waymade Healthcare Plc)              |
| 64160 | 22352811000001103  | Propranolol | Propranolol 5mg/ 5ml oral solution sugar free (AM Distributions (Yorkshire) Ltd) |
| 65435 | 21870211000001103  | Propranolol | Propranolol 10mg tablets (Waymade Healthcare Plc)                                |
| 65986 | 795211000001104    | Propranolol | Propranolol 10mg tablets (Alliance Healthcare (Distribution) Ltd)                |
| 66555 | 14782711000001105  | Propranolol | Propranolol 10mg tablets (Boston Healthcare Ltd)                                 |
| 68400 | 30081311000001101  | Propranolol | Propranolol 160mg tablets (DE Pharmaceuticals)                                   |
| 69661 | 13172311000001106  | Propranolol | Propranolol 3mg/ 5ml oral solution                                               |
| 70680 | 13200011000001100  | Propranolol | Propranolol 6mg/ 5ml oral suspension                                             |
| 70681 | 13171211000001105  | Propranolol | Propranolol 3mg/ 5ml oral suspension                                             |
| 71150 | 13199711000001105  | Propranolol | Propranolol 5mg/ 5ml oral solution                                               |
| 71173 | 30860011000001105  | Propranolol | Propranolol 80mg modified-release capsules (Mawdsley-Brooks & Company Ltd)       |
| 72220 | 24412311000001103  | Propranolol | Propranolol 10mg/ 5ml oral solution sugar free (CST Pharma Ltd)                  |
| 72222 | 30080311000001106  | Propranolol | Propranolol 80mg modified-release capsules (DE Pharmaceuticals)                  |
| 73653 | 9154111000001102   | Propranolol | Propranolol 80mg tablets (Ranbaxy (UK) Ltd)                                      |
| 73765 | 9153711000001103   | Propranolol | Propranolol 10mg tablets (Ranbaxy (UK) Ltd)                                      |
| 75278 | 13199811000001102  | Propranolol | Propranolol 5mg/ 5ml oral suspension                                             |
| 75289 | 32759511000001108  | Propranolol | Propranolol 5mg/ 5ml oral solution sugar free (Rosemont Pharmaceuticals Ltd)     |
| 75312 | 36106711000001107  | Propranolol | Bedranol 80mg tablets (Ennogen Pharma Ltd)                                       |

|       |                    |             |                                                                             |
|-------|--------------------|-------------|-----------------------------------------------------------------------------|
| 75507 |                    | Propranolol | Propranolol 160mg Capsule (IVAX Pharmaceuticals UK Ltd)                     |
| 76252 |                    | Propranolol | Propranolol 160mg modified-release capsules (Teva UK Ltd)                   |
| 76431 |                    | Propranolol | Cardinol 10mg Tablet (C P Pharmaceuticals Ltd)                              |
| 76633 |                    | Propranolol | Propranolol 10mg tablets (DE Pharmaceuticals)                               |
| 77413 |                    | Propranolol | Inderal LA 160mg capsules (Waymade Healthcare Plc)                          |
| 77649 |                    | Propranolol | Half Inderal LA 80mg capsules (DE Pharmaceuticals)                          |
| 20169 | 137695001000027105 | Practolol   | Practolol 2mg/ ml injection                                                 |
| 4588  | 34545001000027108  | Pindolol    | Visken 5mg Tablet (Sovereign Medical Ltd)                                   |
| 5284  | 318512002          | Pindolol    | Pindolol 5mg tablets                                                        |
| 14673 | 318513007          | Pindolol    | Pindolol 15mg tablets                                                       |
| 20012 | 34555001000027106  | Pindolol    | Visken 15mg Tablet (Sovereign Medical Ltd)                                  |
| 32787 | 3887411000001101   | Pindolol    | Visken 15mg tablets (AMCo)                                                  |
| 35695 | 3706111000001105   | Pindolol    | Visken 5mg tablets (AMCo)                                                   |
| 55853 | 96905001000027105  | Pindolol    | Pindolol 15mg Tablet (Hillcross Pharmaceuticals Ltd)                        |
| 73413 | 3707011000001107   | Pindolol    | Pindolol 5mg tablets (A A H Pharmaceuticals Ltd)                            |
| 1333  | 318484005          | Oxprenolol  | Oxprenolol 40mg tablets                                                     |
| 1334  | 36023011000001102  | Oxprenolol  | Oxprenolol 160mg modified-release tablets                                   |
| 2361  | 54835001000027104  | Oxprenolol  | Trasicor 80mg Tablet (Novartis Pharmaceuticals UK Ltd)                      |
| 2780  | 318485006          | Oxprenolol  | Oxprenolol 80mg tablets                                                     |
| 3516  | 318483004          | Oxprenolol  | Oxprenolol 20mg tablets                                                     |
| 3748  | 89605001000027103  | Oxprenolol  | Oxprenolol 160mg Tablet                                                     |
| 4025  | 473011000001107    | Oxprenolol  | Slow-Trasicor 160mg tablets (AMCo)                                          |
| 7474  | 54815001000027105  | Oxprenolol  | Trasicor 20mg Tablet (Novartis Pharmaceuticals UK Ltd)                      |
| 8290  | 54825001000027101  | Oxprenolol  | Trasicor 40mg Tablet (Novartis Pharmaceuticals UK Ltd)                      |
| 10777 | 54865001000027109  | Oxprenolol  | Trasicor 160mg Tablet (Novartis Pharmaceuticals UK Ltd)                     |
| 21885 | 195255001000027109 | Oxprenolol  | Oxyphenix SR 160mg tablets                                                  |
| 24094 | 592911000001104    | Oxprenolol  | Trasicor 40mg tablets (Amdipharm Plc)                                       |
| 25644 | 75595001000027102  | Oxprenolol  | Apsolox 80mg Tablet (Approved Prescription Services Ltd)                    |
| 27357 | 9205001000027107   | Oxprenolol  | Oxprenolol 40mg Tablet (Actavis UK Ltd)                                     |
| 29180 | 568511000001106    | Oxprenolol  | Trasicor 80mg tablets (Amdipharm Plc)                                       |
| 29230 | 90575001000027104  | Oxprenolol  | Slow-pren 160mg Tablet (IVAX Pharmaceuticals UK Ltd)                        |
| 33569 | 9405001000027108   | Oxprenolol  | Oxprenolol sr 160mg Modified-release tablet (Hillcross Pharmaceuticals Ltd) |
| 35062 | 3379011000001106   | Oxprenolol  | Trasicor 20mg tablets (Amdipharm Plc)                                       |
| 74015 | 17595711000001107  | Oxprenolol  | Slow-Trasicor 160mg tablets (Sigma Pharmaceuticals Plc)                     |
| 77445 |                    | Oxprenolol  | Slow-Trasicor 160mg tablets (DE Pharmaceuticals)                            |
| 77461 |                    | Oxprenolol  | Slow-Trasicor 160mg tablets (Waymade Healthcare Plc)                        |
| 751   | 318640004          | Nebivolol   | Nebivolol 5mg tablets                                                       |
| 7528  | 726011000001109    | Nebivolol   | Nebilet 5mg tablets (A. Menarini Farmaceutica Internazionale SRL)           |
| 40761 | 432118006          | Nebivolol   | Nebivolol 2.5mg tablets                                                     |
| 44808 | 16551311000001103  | Nebivolol   | Nebivolol 2.5mg tablets (A A H Pharmaceuticals Ltd)                         |
| 47300 | 15638611000001106  | Nebivolol   | Nebivolol 2.5mg tablets (Glenmark Pharmaceuticals Europe Ltd)               |
| 54487 | 21266011000001105  | Nebivolol   | Nebivolol 2.5mg tablets (Sigma Pharmaceuticals Plc)                         |
| 59961 | 432159000          | Nebivolol   | Nebivolol 10mg tablets                                                      |

|       |                    |                     |                                                                            |
|-------|--------------------|---------------------|----------------------------------------------------------------------------|
| 64703 | 15638211000001109  | Nebivolol           | Nebivolol 5mg tablets (Glenmark Pharmaceuticals Europe Ltd)                |
| 66559 | 5393311000001106   | Nebivolol           | Nebilet 5mg tablets (Waymade Healthcare Plc)                               |
| 67595 | 24483711000001109  | Nebivolol           | Nebivolol 5mg tablets (Almus Pharmaceuticals Ltd)                          |
| 68677 | 14404711000001108  | Nebivolol           | Nebivolol 5mg tablets (Accord Healthcare Ltd)                              |
| 69115 | 14033711000001109  | Nebivolol           | Nebivolol 5mg tablets (A A H Pharmaceuticals Ltd)                          |
| 71032 | 20312411000001102  | Nebivolol           | Nebivolol 5mg tablets (Sandoz Ltd)                                         |
| 74076 | 13801211000001108  | Nebivolol           | Nebivolol 5mg tablets (PLIVA Pharma Ltd)                                   |
| 76484 |                    | Nebivolol           | Nebivolol 5mg tablets (Sigma Pharmaceuticals Plc)                          |
| 2499  | 318481002          | Nadolol             | Nadolol 80mg tablets                                                       |
| 8935  | 318480001          | Nadolol             | Nadolol 40mg tablets                                                       |
| 10716 | 3687411000001106   | Nadolol             | Corgard 80mg tablets (Sanofi)                                              |
| 13415 | 3686511000001108   | Nadolol             | Corgard 40mg tablets (Sanofi-Synthelabo Ltd)                               |
| 66464 | 12300711000001104  | Nadolol             | Nadolol 40mg/ 5ml oral solution                                            |
| 66779 | 16110011000001107  | Nadolol             | Nadolol 30mg/ 5ml oral suspension                                          |
| 67424 | 15227211000001106  | Nadolol             | Nadolol 80mg/ 5ml oral suspension                                          |
| 72159 | 16131011000001109  | Nadolol             | Nadolol 20mg/ 5ml oral suspension                                          |
| 73219 | 12300811000001107  | Nadolol             | Nadolol 40mg/ 5ml oral suspension                                          |
| 74929 | 250335001000027108 | Nadolol             | Nadolol Oral solution                                                      |
| 74930 | 16104311000001104  | Nadolol             | Nadolol 30mg/ 5ml oral suspension (Drug Tariff Special Order)              |
| 77002 |                    | Nadolol             | Corgard 80mg tablets (Lexon (UK) Ltd)                                      |
| 77945 |                    | Nadolol             | Nadolol 20mg/ 5ml oral solution                                            |
| 739   | 318475005          | Metoprolol tartrate | Metoprolol 50mg tablets                                                    |
| 753   | 318474009          | Metoprolol tartrate | Metoprolol 100mg tablets                                                   |
| 3344  | 193911000001101    | Metoprolol tartrate | Betaloc 100mg tablets (AstraZeneca UK Ltd)                                 |
| 3474  | 185111000001102    | Metoprolol tartrate | Betaloc-SA 200mg tablets (AstraZeneca UK Ltd)                              |
| 8068  | 36035411000001108  | Metoprolol tartrate | Metoprolol 200mg modified-release tablets                                  |
| 8071  | 31811000001105     | Metoprolol tartrate | Betaloc 50mg tablets (AstraZeneca UK Ltd)                                  |
| 10429 | 17735001000027102  | Metoprolol tartrate | Lopresor 50mg Tablet (Novartis Pharmaceuticals UK Ltd)                     |
| 11793 | 8669111000001108   | Metoprolol tartrate | Metoprolol 50mg/ 5ml oral suspension                                       |
| 13499 | 17745001000027101  | Metoprolol tartrate | Lopresor 100mg Tablet (Novartis Pharmaceuticals UK Ltd)                    |
| 14502 | 3631211000001109   | Metoprolol tartrate | Metoprolol 5mg/ 5ml solution for injection ampoules                        |
| 20082 | 916111000001108    | Metoprolol tartrate | Lopresor SR 200mg tablets (Recordati Pharmaceuticals Ltd)                  |
| 24461 | 3615711000001109   | Metoprolol tartrate | Betaloc I.V. 5mg/ 5ml solution for injection ampoules (AstraZeneca UK Ltd) |
| 29762 | 120275001000027107 | Metoprolol tartrate | Mepranix 50mg Tablet (Ashbourne Pharmaceuticals Ltd)                       |
| 30400 | 120285001000027102 | Metoprolol tartrate | Mepranix 100mg Tablet (Ashbourne Pharmaceuticals Ltd)                      |
| 32836 | 683311000001100    | Metoprolol tartrate | Metoprolol 50mg tablets (Mylan)                                            |
| 34092 | 89911000001105     | Metoprolol tartrate | Metoprolol 100mg tablets (Teva UK Ltd)                                     |
| 34094 | 393511000001101    | Metoprolol tartrate | Metoprolol 50mg tablets (A A H Pharmaceuticals Ltd)                        |
| 34125 | 121711000001108    | Metoprolol tartrate | Metoprolol 100mg tablets (A A H Pharmaceuticals Ltd)                       |
| 34407 | 126811000001105    | Metoprolol tartrate | Metoprolol 50mg tablets (Teva UK Ltd)                                      |
| 34430 | 499011000001103    | Metoprolol tartrate | Metoprolol 50mg tablets (Actavis UK Ltd)                                   |
| 34509 | 497611000001100    | Metoprolol tartrate | Metoprolol 100mg tablets (Mylan)                                           |
| 34584 | 407511000001102    | Metoprolol tartrate | Metoprolol 50mg tablets (IVAX Pharmaceuticals UK Ltd)                      |

|       |                    |                     |                                                                                  |
|-------|--------------------|---------------------|----------------------------------------------------------------------------------|
| 34854 | 834111000001104    | Metoprolol tartrate | Metoprolol 100mg tablets (Actavis UK Ltd)                                        |
| 34890 | 43455001000027104  | Metoprolol tartrate | Metoprolol 50mg Tablet (Berk Pharmaceuticals Ltd)                                |
| 34925 | 519211000001104    | Metoprolol tartrate | Metoprolol 50mg tablets (Sandoz Ltd)                                             |
| 40167 | 203711000001103    | Metoprolol tartrate | Metoprolol 100mg tablets (IVAX Pharmaceuticals UK Ltd)                           |
| 45289 | 243965001000027101 | Metoprolol Tartrate | Metoprolol tartrate Oral solution                                                |
| 46614 | 113511000001109    | Metoprolol tartrate | Lopresor 50mg tablets (Recordati Pharmaceuticals Ltd)                            |
| 46740 | 756911000001107    | Metoprolol tartrate | Lopresor 100mg tablets (Recordati Pharmaceuticals Ltd)                           |
| 47536 | 304045001000027103 | Metoprolol Tartrate | Metoprolol tartrate 12.5mg/ 5ml Oral suspension                                  |
| 51447 | 8668411000001106   | Metoprolol tartrate | Metoprolol 12.5mg/ 5ml oral suspension                                           |
| 55979 | 8668811000001108   | Metoprolol tartrate | Metoprolol 25mg/ 5ml oral suspension                                             |
| 57240 | 8635811000001107   | Metoprolol tartrate | Metoprolol 50mg/ 5ml oral suspension (Special Order)                             |
| 63724 | 21799011000001109  | Metoprolol tartrate | Metoprolol 100mg tablets (Waymade Healthcare Plc)                                |
| 65227 | 8668211000001107   | Metoprolol tartrate | Metoprolol 12.5mg/ 5ml oral solution                                             |
| 66670 | 610811000001104    | Metoprolol tartrate | Metoprolol 100mg tablets (Alliance Healthcare (Distribution) Ltd)                |
| 68881 | 16632411000001109  | Metoprolol tartrate | Metoprolol 12.5mg capsules                                                       |
| 70116 | 8668911000001103   | Metoprolol tartrate | Metoprolol 50mg/ 5ml oral solution                                               |
| 71098 | 21286311000001105  | Metoprolol tartrate | Metoprolol 50mg tablets (Accord Healthcare Ltd)                                  |
| 74854 | 8668711000001100   | Metoprolol tartrate | Metoprolol 25mg/ 5ml oral solution                                               |
| 75010 | 16235001000027106  | Metoprolol tartrate | Metoprolol tartrate 50mg Tablet (C P Pharmaceuticals Ltd)                        |
| 76180 |                    | Metoprolol tartrate | Metoprolol 5mg/ 5ml oral solution                                                |
| 76531 |                    | Metoprolol tartrate | Metoprolol 10mg/ 5ml oral suspension                                             |
| 27719 | 160665001000027109 | Metoprolol          | Metoros Is 95mg Tablet (Geigy Pharmaceuticals)                                   |
| 29998 | 160625001000027101 | Metoprolol          | Metoros 190mg Tablet (Novartis Pharmaceuticals UK Ltd)                           |
| 77282 |                    | Metoprolol          | Metoprolol 190mg Modified-release tablet                                         |
| 1295  | 318447008          | Labetalol           | Labetalol 400mg tablets                                                          |
| 1597  | 318445000          | Labetalol           | Labetalol 100mg tablets                                                          |
| 2775  | 318446004          | Labetalol           | Labetalol 200mg tablets                                                          |
| 4725  | 318458004          | Labetalol           | Labetalol 50mg tablets                                                           |
| 8707  | 77311000001105     | Labetalol           | Trandate 200mg tablets (RPH Pharmaceuticals AB)                                  |
| 8807  | 674711000001109    | Labetalol           | Trandate 400mg tablets (RPH Pharmaceuticals AB)                                  |
| 9016  | 639011000001106    | Labetalol           | Trandate 100mg tablets (RPH Pharmaceuticals AB)                                  |
| 9273  | 42611000001104     | Labetalol           | Trandate 50mg tablets (RPH Pharmaceuticals AB)                                   |
| 16645 | 82695001000027107  | Labetalol           | Labrocol 400mg Tablet (Lagap)                                                    |
| 19068 | 7978711000001103   | Labetalol           | Labetalol 50mg/ 10ml solution for injection pre-filled syringes                  |
| 19998 | 4413911000001106   | Labetalol           | Trandate 100mg/ 20ml solution for injection ampoules (Focus Pharmaceuticals Ltd) |
| 22793 | 82685001000027108  | Labetalol           | Labrocol 200mg Tablet (Lagap)                                                    |
| 30770 | 22311000001107     | Labetalol           | Labetalol 200mg tablets (A A H Pharmaceuticals Ltd)                              |
| 34171 | 14865001000027100  | Labetalol           | Labetalol 100mg Tablet (C P Pharmaceuticals Ltd)                                 |
| 34177 | 50911000001108     | Labetalol           | Labetalol 100mg tablets (A A H Pharmaceuticals Ltd)                              |
| 34188 | 27395001000027109  | Labetalol           | Labetalol 200mg Tablet (Celltech Pharma Europe Ltd)                              |
| 35778 | 82675001000027103  | Labetalol           | Labrocol 100mg Tablet (Lagap)                                                    |
| 38370 | 36037611000001104  | Labetalol           | Labetalol 100mg/ 20ml solution for injection ampoules                            |
| 40240 | 246511000001107    | Labetalol           | Labetalol 400mg tablets (A A H Pharmaceuticals Ltd)                              |

|       |                    |            |                                                                                         |
|-------|--------------------|------------|-----------------------------------------------------------------------------------------|
| 41827 | 2211000001109      | Labetalol  | Labetalol 100mg tablets (Mylan)                                                         |
| 44083 | 265911000001104    | Labetalol  | Labetalol 200mg tablets (Actavis UK Ltd)                                                |
| 45250 | 929111000001109    | Labetalol  | Labetalol 400mg tablets (Sandoz Ltd)                                                    |
| 47673 | 52485001000027108  | Labetalol  | Labetalol 400mg Tablet (Approved Prescription Services Ltd)                             |
| 47674 | 14875001000027107  | Labetalol  | Labetalol 200mg Tablet (C P Pharmaceuticals Ltd)                                        |
| 59222 | 21024711000001102  | Labetalol  | Labetalol 100mg/ 20ml solution for injection ampoules (RPH Pharmaceuticals AB)          |
| 62638 | 281111000001101    | Labetalol  | Labetalol 100mg tablets (Actavis UK Ltd)                                                |
| 63736 | 22055311000001102  | Labetalol  | Labetalol 100mg tablets (Waymade Healthcare Plc)                                        |
| 72514 | 12643411000001100  | Labetalol  | Labetalol 1.5mg/ 5ml oral solution                                                      |
| 75179 | 99411000001101     | Labetalol  | Labetalol 200mg tablets (Mylan)                                                         |
| 77958 |                    | Labetalol  | Labetalol 50mg/ 5ml oral suspension                                                     |
| 26922 | 10070311000001104  | Esmolol    | Brevibloc Premixed 100mg/ 10ml solution for injection vials (Baxter Healthcare Ltd)     |
| 30541 | 71225001000027104  | Esmolol    | Esmolol 250mg/ ml concentrate solution for infusion                                     |
| 32135 | 10070411000001106  | Esmolol    | Brevibloc Concentrate 2.5g/ 10ml solution for infusion ampoules (Baxter Healthcare Ltd) |
| 39819 | 17033711000001101  | Esmolol    | Esmolol 2.5g/ 250ml infusion bags                                                       |
| 4265  | 157565001000027107 | Celiprolol | Celectol 200mg Tablet (Pantheon Healthcare Ltd)                                         |
| 7974  | 318622003          | Celiprolol | Celiprolol 400mg tablets                                                                |
| 8262  | 318619000          | Celiprolol | Celiprolol 200mg tablets                                                                |
| 16776 | 157575001000027100 | Celiprolol | Celectol 400mg Tablet (Pantheon Healthcare Ltd)                                         |
| 35054 | 864811000001100    | Celiprolol | Celectol 200mg tablets (Zentiva)                                                        |
| 35940 | 479211000001100    | Celiprolol | Celectol 400mg tablets (Zentiva)                                                        |
| 41740 | 749111000001104    | Celiprolol | Celiprolol 200mg tablets (Teva UK Ltd)                                                  |
| 42795 | 354811000001105    | Celiprolol | Celiprolol 200mg tablets (Mylan)                                                        |
| 56485 | 11028811000001103  | Celiprolol | Celectol 200mg tablets (Waymade Healthcare Plc)                                         |
| 57573 | 5530311000001105   | Celiprolol | Celectol 200mg tablets (Dowelhurst Ltd)                                                 |
| 67292 | 14493011000001107  | Celiprolol | Celectol 200mg tablets (Sigma Pharmaceuticals Plc)                                      |
| 74062 | 14493611000001100  | Celiprolol | Celectol 400mg tablets (Sigma Pharmaceuticals Plc)                                      |
| 74623 | 684111000001100    | Celiprolol | Celiprolol 400mg tablets (Mylan)                                                        |
| 817   | 318633000          | Carvedilol | Carvedilol 3.125mg tablets                                                              |
| 2629  | 318631003          | Carvedilol | Carvedilol 12.5mg tablets                                                               |
| 4410  | 318635007          | Carvedilol | Carvedilol 6.25mg tablets                                                               |
| 7049  | 318632005          | Carvedilol | Carvedilol 25mg tablets                                                                 |
| 14117 | 873111000001104    | Carvedilol | Eucardic 3.125mg tablets (Roche Products Ltd)                                           |
| 14146 | 690511000001101    | Carvedilol | Eucardic 6.25mg tablets (Roche Products Ltd)                                            |
| 18414 | 334711000001101    | Carvedilol | Eucardic 12.5mg tablets (Roche Products Ltd)                                            |
| 19202 | 7333911000001104   | Carvedilol | Carvedilol 6.25mg tablets (Teva UK Ltd)                                                 |
| 19437 | 709911000001107    | Carvedilol | Eucardic 25mg tablets (Roche Products Ltd)                                              |
| 33374 | 9034211000001104   | Carvedilol | Carvedilol 12.5mg tablets (Genus Pharmaceuticals Ltd)                                   |
| 34501 | 7332611000001100   | Carvedilol | Carvedilol 12.5mg tablets (Actavis UK Ltd)                                              |
| 34740 | 7332411000001103   | Carvedilol | Carvedilol 6.25mg tablets (Actavis UK Ltd)                                              |
| 34741 | 7402011000001106   | Carvedilol | Carvedilol 3.125mg tablets (IVAX Pharmaceuticals UK Ltd)                                |
| 46935 | 7398911000001101   | Carvedilol | Carvedilol 3.125mg tablets (Actavis UK Ltd)                                             |
| 46936 | 7493711000001102   | Carvedilol | Carvedilol 3.125mg tablets (A A H Pharmaceuticals Ltd)                                  |

|       |                    |                     |                                                       |
|-------|--------------------|---------------------|-------------------------------------------------------|
| 47107 | 8356811000001107   | Carvedilol          | Carvedilol 5mg/ 5ml oral suspension                   |
| 49142 | 12422611000001106  | Carvedilol          | Carvedilol 3.125mg/ 5ml oral suspension               |
| 54106 | 14012311000001106  | Carvedilol          | Carvedilol 1.5mg/ 5ml oral suspension                 |
| 59549 | 8356811000001107   | Carvedilol          | Carvedilol 5mg/ 5ml oral suspension                   |
| 61663 | 7333711000001101   | Carvedilol          | Carvedilol 3.125mg tablets (Teva UK Ltd)              |
| 63422 | 21820811000001101  | Carvedilol          | Carvedilol 12.5mg tablets (Waymade Healthcare Plc)    |
| 67661 | 15072711000001108  | Carvedilol          | Carvedilol 6.25mg tablets (Sigma Pharmaceuticals Plc) |
| 72507 | 7334311000001103   | Carvedilol          | Carvedilol 25mg tablets (Teva UK Ltd)                 |
| 73451 | 11401811000001105  | Carvedilol          | Carvedilol 6.25mg tablets (Almus Pharmaceuticals Ltd) |
| 74619 | 7334111000001100   | Carvedilol          | Carvedilol 12.5mg tablets (Teva UK Ltd)               |
| 77648 |                    | Carvedilol          | Carvedilol 12.5mg tablets (Almus Pharmaceuticals Ltd) |
| 472   | 318590006          | Bisoprolol fumarate | Bisoprolol 5mg tablets                                |
| 594   | 318605000          | Bisoprolol fumarate | Bisoprolol 2.5mg tablets                              |
| 599   | 318604001          | Bisoprolol fumarate | Bisoprolol 1.25mg tablets                             |
| 822   | 243085001000027105 | Bisoprolol Fumarate | Bisoprolol 1.5mg/ 5ml oral suspension                 |
| 1290  | 318591005          | Bisoprolol fumarate | Bisoprolol 10mg tablets                               |
| 3588  | 349611000001108    | Bisoprolol fumarate | Monacor 5mg tablets (Wyeth Pharmaceuticals)           |
| 4771  | 483911000001101    | Bisoprolol fumarate | Emcor LS 5mg tablets (Merck Serono Ltd)               |
| 5713  | 318607008          | Bisoprolol fumarate | Bisoprolol 7.5mg tablets                              |
| 5968  | 329611000001106    | Bisoprolol fumarate | Monacor 10mg tablets (Wyeth Pharmaceuticals)          |
| 7091  | 318606004          | Bisoprolol fumarate | Bisoprolol 3.75mg tablets                             |
| 7553  | 8304811000001108   | Bisoprolol fumarate | Bisoprolol 5mg/ 5ml oral suspension                   |
| 10892 | 106611000001104    | Bisoprolol fumarate | Emcor 10mg tablets (Merck Serono Ltd)                 |
| 14030 | 628711000001102    | Bisoprolol fumarate | Cardicor 2.5mg tablets (Merck Serono Ltd)             |
| 14058 | 712511000001106    | Bisoprolol fumarate | Cardicor 1.25mg tablets (Merck Serono Ltd)            |
| 17615 | 19711000001106     | Bisoprolol fumarate | Cardicor 5mg tablets (Merck Serono Ltd)               |
| 18185 | 404511000001105    | Bisoprolol fumarate | Cardicor 7.5mg tablets (Merck Serono Ltd)             |
| 19178 | 78411000001104     | Bisoprolol fumarate | Bisoprolol 10mg tablets (Ranbaxy (UK) Ltd)            |
| 19200 | 433811000001104    | Bisoprolol fumarate | Bisoprolol 5mg tablets (IVAX Pharmaceuticals UK Ltd)  |
| 19853 | 823111000001103    | Bisoprolol fumarate | Cardicor 3.75mg tablets (Merck Serono Ltd)            |
| 19858 | 890111000001100    | Bisoprolol fumarate | Cardicor 10mg tablets (Merck Serono Ltd)              |
| 21905 | 405411000001107    | Bisoprolol fumarate | Bipranix 10mg tablets (Ashbourne Pharmaceuticals Ltd) |
| 21966 | 501211000001103    | Bisoprolol fumarate | Bipranix 5mg tablets (Ashbourne Pharmaceuticals Ltd)  |
| 24083 | 853911000001104    | Bisoprolol fumarate | Bisoprolol 5mg tablets (Teva UK Ltd)                  |
| 32114 | 573811000001107    | Bisoprolol fumarate | Bisoprolol 5mg tablets (Mylan)                        |
| 32552 | 10241511000001108  | Bisoprolol fumarate | Congescor 2.5mg tablets (Tillomed Laboratories Ltd)   |
| 32630 | 9739311000001105   | Bisoprolol fumarate | Vivacor 10mg tablets (Lexon (UK) Ltd)                 |
| 33839 | 13211000001101     | Bisoprolol fumarate | Bisoprolol 10mg tablets (Actavis UK Ltd)              |
| 33909 | 10241311000001102  | Bisoprolol fumarate | Congescor 1.25mg tablets (Tillomed Laboratories Ltd)  |
| 34821 | 502311000001102    | Bisoprolol fumarate | Bisoprolol 10mg tablets (Mylan)                       |
| 34963 | 706111000001101    | Bisoprolol fumarate | Bisoprolol 5mg tablets (Actavis UK Ltd)               |
| 37118 | 10743711000001105  | Bisoprolol fumarate | Bisoprolol 2.5mg tablets (A A H Pharmaceuticals Ltd)  |
| 37837 | 187815001000027109 | Bisoprolol fumarate | Bisoprolol 2.5mg Tablet (Teva UK Ltd)                 |

|       |                    |                     |                                                                    |
|-------|--------------------|---------------------|--------------------------------------------------------------------|
| 38991 | 13919811000001103  | Bisoprolol fumarate | Bisoprolol 7.5mg tablets (A A H Pharmaceuticals Ltd)               |
| 39646 | 256485001000027100 | Bisoprolol Fumarate | Bisoprolol 0.625mg/ 5ml oral solution                              |
| 39846 | 9105811000001100   | Bisoprolol fumarate | Vivacor 5mg tablets (Lexon (UK) Ltd)                               |
| 41591 | 888911000001101    | Bisoprolol fumarate | Bisoprolol 10mg tablets (Teva UK Ltd)                              |
| 43251 | 13436011000001108  | Bisoprolol fumarate | Bisoprolol 1.25mg tablets (Mylan)                                  |
| 43564 | 112235001000027100 | Bisoprolol fumarate | Bisoprolol 5mg Tablet (PLIVA Pharma Ltd)                           |
| 44000 | 12287611000001100  | Bisoprolol fumarate | Bisoprolol 2.5mg/ 5ml oral suspension                              |
| 47041 | 13436211000001103  | Bisoprolol fumarate | Bisoprolol 2.5mg tablets (Mylan)                                   |
| 50224 | 20475811000001108  | Bisoprolol fumarate | Congescor 2.5mg tablets (Teva UK Ltd)                              |
| 50300 | 20475611000001109  | Bisoprolol fumarate | Congescor 1.25mg tablets (Teva UK Ltd)                             |
| 50403 | 187775001000027103 | Bisoprolol fumarate | Bisoprolol 1.25mg Tablet (Teva UK Ltd)                             |
| 50514 | 17012411000001106  | Bisoprolol fumarate | Bisoprolol 2.5mg tablets (Chanelle Medical UK Ltd)                 |
| 51528 | 20358011000001102  | Bisoprolol fumarate | Bisoprolol 1.25mg tablets (Actavis UK Ltd)                         |
| 52548 | 18506211000001103  | Bisoprolol fumarate | Bisoprolol 1.25mg tablets (Almus Pharmaceuticals Ltd)              |
| 52611 | 12287311000001105  | Bisoprolol fumarate | Bisoprolol 10mg/ 5ml oral solution                                 |
| 52635 | 557311000001108    | Bisoprolol fumarate | Bisoprolol 5mg tablets (Alliance Healthcare (Distribution) Ltd)    |
| 52686 | 12287511000001104  | Bisoprolol fumarate | Bisoprolol 2.5mg/ 5ml oral solution                                |
| 53334 | 632011000001104    | Bisoprolol fumarate | Bisoprolol 10mg tablets (A A H Pharmaceuticals Ltd)                |
| 53664 | 20283611000001102  | Bisoprolol fumarate | Bisoprolol 2.5mg tablets (Sandoz Ltd)                              |
| 53885 | 11252511000001108  | Bisoprolol fumarate | Bisoprolol 1.25mg tablets (A A H Pharmaceuticals Ltd)              |
| 53916 | 18506411000001104  | Bisoprolol fumarate | Bisoprolol 2.5mg tablets (Almus Pharmaceuticals Ltd)               |
| 54479 | 10740611000001105  | Bisoprolol fumarate | Bisoprolol 1.25mg tablets (Alliance Healthcare (Distribution) Ltd) |
| 55298 | 15058011000001107  | Bisoprolol fumarate | Bisoprolol 10mg tablets (Sigma Pharmaceuticals Plc)                |
| 55791 | 20357211000001108  | Bisoprolol fumarate | Bisoprolol 3.75mg tablets (Actavis UK Ltd)                         |
| 55929 | 21281511000001108  | Bisoprolol fumarate | Bisoprolol 5mg tablets (Accord Healthcare Ltd)                     |
| 56240 | 20283811000001103  | Bisoprolol fumarate | Bisoprolol 3.75mg tablets (Sandoz Ltd)                             |
| 56459 | 21281311000001102  | Bisoprolol fumarate | Bisoprolol 2.5mg tablets (Accord Healthcare Ltd)                   |
| 56486 | 5582411000001107   | Bisoprolol fumarate | Monocor 10mg tablets (Dowelhurst Ltd)                              |
| 56768 | 18553111000001106  | Bisoprolol fumarate | Bisoprolol 2.5mg tablets (Niche Generics Ltd)                      |
| 57023 | 18506411000001104  | Bisoprolol fumarate | Bisoprolol 2.5mg tablets (Almus Pharmaceuticals Ltd)               |
| 57176 | 21281711000001103  | Bisoprolol fumarate | Bisoprolol 10mg tablets (Accord Healthcare Ltd)                    |
| 57578 | 17619411000001108  | Bisoprolol fumarate | Cardicor 2.5mg tablets (Necessity Supplies Ltd)                    |
| 57626 | 8305311000001100   | Bisoprolol fumarate | Bisoprolol 1.25mg/ 5ml oral solution                               |
| 57934 | 7376711000001106   | Bisoprolol fumarate | Bisoprolol 5mg tablets (Sandoz Ltd)                                |
| 58109 | 8305211000001108   | Bisoprolol fumarate | Bisoprolol 1.25mg/ 5ml oral suspension                             |
| 58455 | 20284011000001106  | Bisoprolol fumarate | Bisoprolol 7.5mg tablets (Sandoz Ltd)                              |
| 58498 | 22496711000001105  | Bisoprolol fumarate | Bisoprolol 2.5mg tablets (Medreich Plc)                            |
| 58511 | 20283411000001100  | Bisoprolol fumarate | Bisoprolol 1.25mg tablets (Sandoz Ltd)                             |
| 58763 | 21802011000001102  | Bisoprolol fumarate | Bisoprolol 2.5mg tablets (Waymade Healthcare Plc)                  |
| 58973 | 10437911000001106  | Bisoprolol fumarate | Bisoprolol 10mg tablets (Niche Generics Ltd)                       |
| 58974 | 10740811000001109  | Bisoprolol fumarate | Bisoprolol 2.5mg tablets (Alliance Healthcare (Distribution) Ltd)  |
| 58982 | 19734511000001102  | Bisoprolol fumarate | Bisoprolol 10mg tablets (Medreich Plc)                             |
| 59037 | 249811000001104    | Bisoprolol fumarate | Bisoprolol 5mg tablets (A A H Pharmaceuticals Ltd)                 |

|       |                    |                     |                                                                         |
|-------|--------------------|---------------------|-------------------------------------------------------------------------|
| 59148 | 20577811000001109  | Bisoprolol fumarate | Bisoprolol 2.5mg tablets (Zentiva)                                      |
| 59495 | 21105111000001104  | Bisoprolol fumarate | Bisoprolol 1.25mg tablets (Teva UK Ltd)                                 |
| 59969 | 18497711000001100  | Bisoprolol fumarate | Bisoprolol 5mg tablets (Almus Pharmaceuticals Ltd)                      |
| 60502 | 19708211000001104  | Bisoprolol fumarate | Bisoprolol 3.75mg tablets (DE Pharmaceuticals)                          |
| 60761 | 22495911000001100  | Bisoprolol fumarate | Bisoprolol 1.25mg tablets (Medreich Plc)                                |
| 60896 | 19734211000001100  | Bisoprolol fumarate | Bisoprolol 5mg tablets (Medreich Plc)                                   |
| 61115 | 8304911000001103   | Bisoprolol fumarate | Bisoprolol 5mg/ 5ml oral solution                                       |
| 61340 | 19708411000001100  | Bisoprolol fumarate | Bisoprolol 5mg tablets (DE Pharmaceuticals)                             |
| 61564 | 21802311000001104  | Bisoprolol fumarate | Bisoprolol 3.75mg tablets (Waymade Healthcare Plc)                      |
| 61651 | 18506811000001102  | Bisoprolol fumarate | Bisoprolol 7.5mg tablets (Almus Pharmaceuticals Ltd)                    |
| 62361 | 17012211000001107  | Bisoprolol fumarate | Bisoprolol 1.25mg tablets (Chanelle Medical UK Ltd)                     |
| 62407 | 250065001000027102 | Bisoprolol Fumarate | Bisoprolol oral solution                                                |
| 63493 | 17328511000001103  | Bisoprolol fumarate | Bisoprolol 2.5mg tablets (Actavis UK Ltd)                               |
| 63535 | 10285811000001100  | Bisoprolol fumarate | Bisoprolol 5mg tablets (Relonchem Ltd)                                  |
| 63850 | 21108211000001103  | Bisoprolol fumarate | Bisoprolol 2.5mg tablets (Teva UK Ltd)                                  |
| 64538 | 18743711000001108  | Bisoprolol fumarate | Bisoprolol 3.75mg tablets (Teva UK Ltd)                                 |
| 64784 | 10438411000001104  | Bisoprolol fumarate | Bisoprolol 5mg tablets (Niche Generics Ltd)                             |
| 64850 | 19708011000001109  | Bisoprolol fumarate | Bisoprolol 2.5mg tablets (DE Pharmaceuticals)                           |
| 65805 | 21800411000001105  | Bisoprolol fumarate | Bisoprolol 1.25mg tablets (Waymade Healthcare Plc)                      |
| 65821 | 14159111000001101  | Bisoprolol fumarate | Bisoprolol 7.5mg/ 5ml oral suspension                                   |
| 69156 | 22495711000001102  | Bisoprolol fumarate | Bisoprolol 3.75mg tablets (Medreich Plc)                                |
| 71472 | 21801411000001101  | Bisoprolol fumarate | Bisoprolol 5mg tablets (Waymade Healthcare Plc)                         |
| 72285 | 30001311000001100  | Bisoprolol fumarate | Bisoprolol 1.25mg tablets (Mawdsley-Brooks & Company Ltd)               |
| 72540 | 12287411000001103  | Bisoprolol fumarate | Bisoprolol 10mg/ 5ml oral suspension                                    |
| 73638 | 18497711000001100  | Bisoprolol fumarate | Bisoprolol 5mg tablets (Almus Pharmaceuticals Ltd)                      |
| 73641 | 18497911000001103  | Bisoprolol fumarate | Bisoprolol 10mg tablets (Almus Pharmaceuticals Ltd)                     |
| 73809 | 18506211000001103  | Bisoprolol fumarate | Bisoprolol 1.25mg tablets (Almus Pharmaceuticals Ltd)                   |
| 74742 | 15160311000001108  | Bisoprolol fumarate | Bisoprolol 625micrograms/ 5ml oral suspension                           |
| 75463 |                    | Bisoprolol fumarate | Bisoprolol 625micrograms/ 5ml oral solution                             |
| 76299 |                    | Bisoprolol fumarate | Bisoprolol 10mg tablets (Kent Pharmaceuticals Ltd)                      |
| 76322 |                    | Bisoprolol fumarate | Bisoprolol 10mg tablets (Almus Pharmaceuticals Ltd)                     |
| 76483 |                    | Bisoprolol fumarate | Bisoprolol 1.25mg tablets (Sigma Pharmaceuticals Plc)                   |
| 77219 |                    | Bisoprolol fumarate | Bisoprolol 7.5mg tablets (Waymade Healthcare Plc)                       |
| 5     | 318420003          | Atenolol            | Atenolol 50mg tablets                                                   |
| 24    | 318421004          | Atenolol            | Atenolol 100mg tablets                                                  |
| 26    | 318434003          | Atenolol            | Atenolol 25mg tablets                                                   |
| 197   | 35903411000001106  | Atenolol            | Atenolol 5mg/ 10ml solution for injection ampoules                      |
| 2432  | 423911000001107    | Atenolol            | Tenormin LS 50mg tablets (AstraZeneca UK Ltd)                           |
| 2587  | 162411000001102    | Atenolol            | Tenormin 100mg tablets (AstraZeneca UK Ltd)                             |
| 2590  | 317111000001101    | Atenolol            | Tenormin 25mg tablets (AstraZeneca UK Ltd)                              |
| 6066  | 35903211000001107  | Atenolol            | Atenolol 25mg/ 5ml oral solution sugar free                             |
| 7429  | 9111000001107      | Atenolol            | Tenormin 5mg/ 10ml solution for injection ampoules (AstraZeneca UK Ltd) |
| 10191 | 271911000001106    | Atenolol            | Atenix 50 tablets (Ashbourne Pharmaceuticals Ltd)                       |



|       |                    |          |                                                                |
|-------|--------------------|----------|----------------------------------------------------------------|
| 13394 | 373311000001100    | Atenolol | Tenormin 25mg/ 5ml syrup (AstraZeneca UK Ltd)                  |
| 15176 | 182175001000027108 | Atenolol | Totamol 50mg Tablet (C P Pharmaceuticals Ltd)                  |
| 15730 | 182185001000027103 | Atenolol | Totamol 100mg Tablet (C P Pharmaceuticals Ltd)                 |
| 17322 | 482511000001101    | Atenolol | Atenix 25 tablets (Ashbourne Pharmaceuticals Ltd)              |
| 18950 | 182195001000027104 | Atenolol | Totamol 25mg Tablet (C P Pharmaceuticals Ltd)                  |
| 19172 | 600811000001101    | Atenolol | Atenolol 25mg tablets (IVAX Pharmaceuticals UK Ltd)            |
| 19182 | 852111000001108    | Atenolol | Atenolol 50mg tablets (IVAX Pharmaceuticals UK Ltd)            |
| 19191 | 857511000001101    | Atenolol | Atenolol 100mg tablets (Teva UK Ltd)                           |
| 20502 | 181611000001107    | Atenolol | Atenix 100 tablets (Ashbourne Pharmaceuticals Ltd)             |
| 20728 | 234895001000027106 | Atenolol | Atenamin 25mg Tablet (OPD Pharm)                               |
| 21133 | 234905001000027103 | Atenolol | Atenamin 50mg Tablet (OPD Pharm)                               |
| 24191 | 874711000001101    | Atenolol | Antipressan 50mg tablets (Teva UK Ltd)                         |
| 24195 | 734011000001102    | Atenolol | Antipressan 100mg tablets (Teva UK Ltd)                        |
| 26211 | 877011000001106    | Atenolol | Antipressan 25mg tablets (Teva UK Ltd)                         |
| 29368 | 623811000001100    | Atenolol | Atenolol 25mg tablets (Teva UK Ltd)                            |
| 29398 | 234915001000027101 | Atenolol | Atenamin 100mg Tablet (OPD Pharm)                              |
| 30636 | 182145001000027107 | Atenolol | Vasaten 50mg Tablet (Shire Pharmaceuticals Ltd)                |
| 31536 | 907211000001102    | Atenolol | Atenolol 25mg tablets (Kent Pharmaceuticals Ltd)               |
| 31934 | 646611000001108    | Atenolol | Atenolol 100mg tablets (IVAX Pharmaceuticals UK Ltd)           |
| 33079 | 35311000001104     | Atenolol | Atenolol 100mg tablets (Mylan)                                 |
| 33085 | 422011000001104    | Atenolol | Atenolol 100mg tablets (A A H Pharmaceuticals Ltd)             |
| 33092 | 58311000001109     | Atenolol | Atenolol 50mg tablets (A A H Pharmaceuticals Ltd)              |
| 33184 | 417811000001102    | Atenolol | Atenolol 100mg tablets (Wockhardt UK Ltd)                      |
| 33650 | 225111000001106    | Atenolol | Atenolol 50mg tablets (Mylan)                                  |
| 33657 | 10811000001107     | Atenolol | Atenolol 25mg tablets (A A H Pharmaceuticals Ltd)              |
| 33850 | 401411000001109    | Atenolol | Atenolol 50mg tablets (Actavis UK Ltd)                         |
| 34265 | 884011000001109    | Atenolol | Atenolol 50mg tablets (Sandoz Ltd)                             |
| 34365 | 674511000001104    | Atenolol | Atenolol 50mg tablets (Teva UK Ltd)                            |
| 34443 | 335611000001106    | Atenolol | Atenolol 50mg tablets (Wockhardt UK Ltd)                       |
| 34492 | 774211000001105    | Atenolol | Atenolol 25mg tablets (Mylan)                                  |
| 34575 | 375411000001106    | Atenolol | Atenolol 25mg tablets (Wockhardt UK Ltd)                       |
| 34585 | 393011000001109    | Atenolol | Atenolol 25mg tablets (Sandoz Ltd)                             |
| 34695 | 790911000001104    | Atenolol | Atenolol 50mg tablets (Kent Pharmaceuticals Ltd)               |
| 34754 | 282111000001106    | Atenolol | Atenolol 100mg tablets (Sandoz Ltd)                            |
| 34882 | 38985001000027109  | Atenolol | Atenolol 50mg Tablet (Berk Pharmaceuticals Ltd)                |
| 34976 | 13740111000001101  | Atenolol | Atenolol 25mg tablets (Tillomed Laboratories Ltd)              |
| 36261 | 13740311000001104  | Atenolol | Atenolol 50mg tablets (Tillomed Laboratories Ltd)              |
| 44858 | 244111000001105    | Atenolol | Atenolol 25mg tablets (Actavis UK Ltd)                         |
| 46908 | 721711000001100    | Atenolol | Atenolol 100mg tablets (Kent Pharmaceuticals Ltd)              |
| 46931 | 275811000001103    | Atenolol | Atenolol 100mg tablets (Actavis UK Ltd)                        |
| 47870 | 9791011000001101   | Atenolol | Atenolol 25mg tablets (Almus Pharmaceuticals Ltd)              |
| 49953 | 15986211000001103  | Atenolol | Atenolol 25mg tablets (Bristol Laboratories Ltd)               |
| 50702 | 47711000001105     | Atenolol | Atenolol 25mg tablets (Alliance Healthcare (Distribution) Ltd) |

|       |                    |            |                                                                                      |
|-------|--------------------|------------|--------------------------------------------------------------------------------------|
| 51643 | 11560811000001105  | Atenolol   | Atenolol 25mg/ 5ml oral solution sugar free (Alliance Healthcare (Distribution) Ltd) |
| 51998 | 18280111000001102  | Atenolol   | Atenolol 25mg tablets (Strides Shasun (UK) Ltd)                                      |
| 52310 | 20137611000001100  | Atenolol   | Atenolol 25mg tablets (Crescent Pharma Ltd)                                          |
| 52500 | 9791711000001104   | Atenolol   | Atenolol 50mg tablets (Almus Pharmaceuticals Ltd)                                    |
| 53204 | 263511000001107    | Atenolol   | Atenolol 50mg tablets (Alliance Healthcare (Distribution) Ltd)                       |
| 53215 | 15986411000001104  | Atenolol   | Atenolol 50mg tablets (Bristol Laboratories Ltd)                                     |
| 53414 | 18458611000001100  | Atenolol   | Atenolol 50mg tablets (Accord Healthcare Ltd)                                        |
| 53802 | 15070211000001102  | Atenolol   | Atenolol 25mg tablets (Sigma Pharmaceuticals Plc)                                    |
| 53826 | 14801811000001107  | Atenolol   | Atenolol 25mg tablets (Boston Healthcare Ltd)                                        |
| 54542 | 15968011000001105  | Atenolol   | Atenolol 25mg tablets (Zanza Laboratories Ltd)                                       |
| 54752 | 18279911000001104  | Atenolol   | Atenolol 50mg tablets (Strides Shasun (UK) Ltd)                                      |
| 55778 | 17788311000001101  | Atenolol   | Atenolol 50mg tablets (Phoenix Healthcare Distribution Ltd)                          |
| 56445 | 16183211000001105  | Atenolol   | Atenolol 25mg/ 5ml oral solution sugar free (A A H Pharmaceuticals Ltd)              |
| 57817 | 11177311000001101  | Atenolol   | Atenolol 50mg tablets (Zentiva)                                                      |
| 59695 | 14802011000001109  | Atenolol   | Atenolol 50mg tablets (Boston Healthcare Ltd)                                        |
| 59982 | 18458411000001103  | Atenolol   | Atenolol 25mg tablets (Accord Healthcare Ltd)                                        |
| 61573 | 12015011000001105  | Atenolol   | Atenolol 25mg/ 5ml oral solution                                                     |
| 62325 | 21778611000001100  | Atenolol   | Atenolol 25mg tablets (Waymade Healthcare Plc)                                       |
| 64973 | 29771711000001105  | Atenolol   | Atenolol 50mg tablets (Sigma Pharmaceuticals Plc)                                    |
| 66548 | 22612611000001101  | Atenolol   | Atenolol 50mg tablets (DE Pharmaceuticals)                                           |
| 69526 | 12079211000001106  | Atenolol   | Atenolol 50mg/ 5ml oral solution                                                     |
| 70135 | 22612411000001104  | Atenolol   | Atenolol 25mg tablets (DE Pharmaceuticals)                                           |
| 71026 | 11399511000001103  | Atenolol   | Atenolol 100mg tablets (Almus Pharmaceuticals Ltd)                                   |
| 72043 | 21778811000001101  | Atenolol   | Atenolol 50mg tablets (Waymade Healthcare Plc)                                       |
| 72810 | 12014311000001109  | Atenolol   | Atenolol 10mg/ 5ml oral solution                                                     |
| 73151 | 28945211000001109  | Atenolol   | Atenolol 50mg tablets (Crescent Pharma Ltd)                                          |
| 76593 |                    | Atenolol   | Atenolol 25mg/ 5ml oral solution sugar free (DE Pharmaceuticals)                     |
| 77198 |                    | Atenolol   | Atenolol 100mg tablets (Phoenix Healthcare Distribution Ltd)                         |
| 77613 |                    | Atenolol   | Atenolol 25mg/ 5ml oral suspension                                                   |
| 7620  | 318414004          | Acebutolol | Acebutolol 400mg tablets                                                             |
| 8023  | 298111000001105    | Acebutolol | Sectral 400mg tablets (Sanofi)                                                       |
| 8113  | 318413005          | Acebutolol | Acebutolol 200mg capsules                                                            |
| 8172  | 318412000          | Acebutolol | Acebutolol 100mg capsules                                                            |
| 8555  | 925711000001108    | Acebutolol | Sectral 200mg capsules (Sanofi)                                                      |
| 12296 | 632811000001105    | Acebutolol | Sectral 100mg capsules (Sanofi)                                                      |
| 45309 | 9703611000001105   | Acebutolol | Acebutolol 400mg tablets (A A H Pharmaceuticals Ltd)                                 |
| 65438 | 9703211000001108   | Acebutolol | Acebutolol 100mg capsules (A A H Pharmaceuticals Ltd)                                |
| 72545 | 9703411000001107   | Acebutolol | Acebutolol 200mg capsules (A A H Pharmaceuticals Ltd)                                |
| 77435 |                    | Acebutolol | Sectral 400mg tablets (Mawdsley-Brooks & Company Ltd)                                |
| 3041  | 108205001000027101 |            | SOTALOL 40 MG INJ                                                                    |
| 4021  | 177775001000027104 |            | PROPRANOLOL 20 MG TAB                                                                |
| 7491  | 177255001000027105 |            | LABETALOL TAB                                                                        |
| 12119 | 132615001000027106 |            | SOTALOL S/ R 80 MG TAB                                                               |

|                                                                  |                    |                                         |                                                                        |
|------------------------------------------------------------------|--------------------|-----------------------------------------|------------------------------------------------------------------------|
| 12497                                                            | 166645001000027109 |                                         | OXPRENOLOL 10 MG TAB                                                   |
| 16669                                                            | 72615001000027105  |                                         | LOPRESOR SR 200 MG TAB                                                 |
| 17876                                                            | 112415001000027107 |                                         | METOPROLOL FUMARATE 190 MG TAB                                         |
| 18722                                                            |                    |                                         | CARVEDILOL                                                             |
| 19810                                                            | 181045001000027103 |                                         | BEDRANOL SR 80 MG CAP                                                  |
| 20813                                                            |                    |                                         | BETALOC S.A.                                                           |
| 22634                                                            | 135155001000027102 |                                         | PROPRANOLOL 10 MG SUS                                                  |
| 22796                                                            |                    |                                         | CARVEDILOL 3.125 MG                                                    |
| 23598                                                            |                    |                                         | SOTALOL S/ R                                                           |
| 23604                                                            |                    |                                         | PROPRANOLOL S/ R                                                       |
| 24378                                                            |                    |                                         | BETALOC S.A. (CALENDAR PACK)                                           |
| 24677                                                            |                    |                                         | ATENOLOL                                                               |
| 25037                                                            |                    |                                         | ATENOLOL                                                               |
| 25052                                                            |                    |                                         | HALF-INDERAL LA                                                        |
| 25818                                                            | 164975001000027100 |                                         | PROPRANOLOL 30 MG SUS                                                  |
| 26105                                                            | 165015001000027106 |                                         | PROPRANOLOL paed 4 MG TAB                                              |
| 26290                                                            | 99325001000027104  |                                         | SOTACOR 40 MG INJ                                                      |
| 26788                                                            | 135175001000027104 |                                         | PROPRANOLOL 2.5 MG ELI                                                 |
| 27036                                                            | 164995001000027109 |                                         | PROPRANOLOL POWDERS 5 MG POW                                           |
| 28493                                                            | 100955001000027108 |                                         | METOPROLOL FUMARATE 95 MG TAB                                          |
| 29803                                                            | 135135001000027101 |                                         | PROPRANOLOL 3 MG ELI                                                   |
| 32470                                                            | 135035001000027107 |                                         | PROPRANOLOL 1 MG LIQ                                                   |
| 44310                                                            |                    |                                         | INDERAL                                                                |
| 46493                                                            | 135125001000027103 |                                         | PROPRANOLOL 15 MG SYR                                                  |
| <b>Betablockers in combination with calcium channel blockers</b> |                    |                                         |                                                                        |
| 15117                                                            | 156825001000027102 | Nifedipine/ Atenolol                    | Nifedipine with atenolol 20mg + 50mg Capsule                           |
| 1684                                                             | 3142711000001107   | Atenolol/ Nifedipine                    | Beta-Adalat modified-release capsules (Bayer Plc)                      |
| 4542                                                             | 35903311000001104  | Atenolol/ Nifedipine                    | Atenolol 50mg / Nifedipine 20mg modified-release capsules              |
| 8642                                                             | 3142511000001102   | Atenolol/ Nifedipine                    | Tenif 50mg/ 20mg modified-release capsules (AstraZeneca UK Ltd)        |
| 52728                                                            | 16141111000001106  | Atenolol/ Nifedipine                    | Beta-Adalat modified-release capsules (Lexon (UK) Ltd)                 |
| 61719                                                            | 10490311000001102  | Atenolol/ Nifedipine                    | Beta-Adalat modified-release capsules (Waymade Healthcare Plc)         |
| 68020                                                            | 14208611000001108  | Atenolol/ Nifedipine                    | Beta-Adalat modified-release capsules (Sigma Pharmaceuticals Plc)      |
| 74039                                                            | 14625611000001108  | Atenolol/ Nifedipine                    | Tenif 50mg/ 20mg modified-release capsules (Sigma Pharmaceuticals Plc) |
| 76440                                                            |                    | Atenolol/ Nifedipine                    | Beta-Adalat modified-release capsules (Dowelhurst Ltd)                 |
| <b>Betablockers and Diuretics</b>                                |                    |                                         |                                                                        |
| 8623                                                             | 38405001000027107  | Timolol maleate/<br>Bendroflumethiazide | Prestim Tablet (ICN Pharmaceuticals France S.A.)                       |
| 12517                                                            | 144255001000027109 | Timolol Maleate/<br>Bendroflumethiazide | Timolol maleate with bendroflumethiazide 20mg + 5mg Tablet             |
| 12651                                                            | 318556002          | Timolol maleate/<br>Bendroflumethiazide | Timolol 10mg / Bendroflumethiazide 2.5mg tablets                       |

|       |                    |                                             |                                                                                      |
|-------|--------------------|---------------------------------------------|--------------------------------------------------------------------------------------|
| 19142 | 148855001000027103 | Timolol Maleate/<br>Bendroflumethiazide     | Bendroflumethiazide 2.5mg with Timolol maleate 10mg tablets                          |
| 21025 | 144325001000027103 | Timolol Maleate/<br>Bendroflumethiazide     | Prestim forte Tablet (LEO Pharma)                                                    |
| 25363 | 98411000001109     | Timolol maleate/<br>Bendroflumethiazide     | Prestim tablets (Meda Pharmaceuticals Ltd)                                           |
| 3691  | 141295001000027106 | Sotalol / Hydrochlorothiazide               | Sotalol 160mg with hydrochlorothiazide 25mg tablet                                   |
| 8061  | 141285001000027107 | Sotalol / Hydrochlorothiazide               | Sotalol 80mg with hydrochlorothiazide 12.5mg tablet                                  |
| 12456 | 29205001000027105  | Sotalol / Hydrochlorothiazide               | Sotazide Tablet (Bristol-Myers Squibb Pharmaceuticals Ltd)                           |
| 15042 | 141405001000027109 | Sotalol / Hydrochlorothiazide               | Tolerzide Tablet (Bristol-Myers Squibb Pharmaceuticals Ltd)                          |
| 17783 | 75195001000027107  | Propranolol / Spironolactone                | Spiroprop Tablet (Pharmacia Ltd)                                                     |
| 4796  | 333111000001104    | Propranolol / Bendroflumethiazide           | Inderetic 80mg/ 2.5mg capsules (AstraZeneca UK Ltd)                                  |
| 8369  | 350811000001100    | Propranolol / Bendroflumethiazide           | Inderex 160mg/ 5mg modified-release capsules (AstraZeneca UK Ltd)                    |
| 8987  | 35932411000001108  | Propranolol / Bendroflumethiazide           | Propranolol 160mg modified-release / Bendroflumethiazide 5mg capsules                |
| 12054 | 318584007          | Propranolol / Bendroflumethiazide           | Propranolol 80mg / Bendroflumethiazide 2.5mg capsules                                |
| 22912 | 148735001000027104 | Propranolol / Bendroflumethiazide           | Bendroflumethiazide 2.5mg with Propanolol 80mg capsules                              |
| 23131 | 148745001000027103 | Propranolol / Bendroflumethiazide           | Bendroflumethiazide 5mg with Propanolol 160mg modified-release capsules              |
| 25462 | 103335001000027100 | Pindolol/ Clopamide                         | Clopamide 5mg with Pindolol 10mg tablets                                             |
| 77387 |                    | Pindolol/ Clopamide                         | Viskaldix tablets (Waymade Healthcare Plc)                                           |
| 24832 | 39675001000027101  | Penbutolol/ Furosemide                      | Lasipressin Tablet (Hoechst UK Ltd)                                                  |
| 26529 | 108015001000027108 | Penbutolol/ Furosemide                      | Furosemide with penbutolol Tablet                                                    |
| 4429  | 3444411000001107   | Oxprenolol / Cyclopenthiiazide              | Trasidrex modified-release tablets (Mercury Pharma Group Ltd)                        |
| 8673  | 189585001000027103 | Oxprenolol / Cyclopenthiiazide              | Oxprenolol with cyclopenthiiazide 160mg+0.25mg Modified-release tablet               |
| 13871 | 36091611000001101  | Oxprenolol / Cyclopenthiiazide              | Co-prenozone 160mg/ 0.25mg modified-release tablets                                  |
| 52145 | 104605001000027104 | Oxprenolol / Cyclopenthiiazide              | Cyclopenthiiazide 0.25mg with oxprenolol 160mg modified-release tablets              |
| 5330  | 3886211000001102   | Nadolol/ Bendroflumethiazide                | Corgaretic 40mg tablets (Sanofi-Synthelabo Ltd)                                      |
| 11338 | 148805001000027106 | Nadolol/ Bendroflumethiazide                | Bendroflumethiazide 5mg with Nadolol 40mg tablets                                    |
| 14438 | 4057911000001102   | Nadolol/ Bendroflumethiazide                | Corgaretic 80mg tablets (Sanofi-Synthelabo Ltd)                                      |
| 23134 | 318549008          | Nadolol/ Bendroflumethiazide                | Nadolol 40mg / Bendroflumethiazide 5mg tablets                                       |
| 27946 | 318550008          | Nadolol/ Bendroflumethiazide                | Nadolol 80mg / Bendroflumethiazide 5mg tablets                                       |
| 69334 | 148815001000027108 | Nadolol/ Bendroflumethiazide                | Bendroflumethiazide 5mg with Nadolol 80mg tablets                                    |
| 7066  | 318546001          | Metoprolol tartrate/<br>Hydrochlorothiazide | Metoprolol 100mg / Hydrochlorothiazide 12.5mg tablets                                |
| 10627 | 2977611000001106   | Metoprolol tartrate/<br>Hydrochlorothiazide | Co-Betaloc tablets (Pfizer Ltd)                                                      |
| 18287 | 3853411000001104   | Metoprolol tartrate/<br>Hydrochlorothiazide | Co-Betaloc SA tablets (Pfizer Ltd)                                                   |
| 20093 | 36035311000001101  | Metoprolol tartrate/<br>Hydrochlorothiazide | Metoprolol 200mg modified-release / Hydrochlorothiazide 25mg tablets                 |
| 29427 | 157645001000027106 | Metoprolol Tartrate/<br>Hydrochlorothiazide | Hydrochlorothiazide with metoprolol tartrate 12.5mg with 100mg tablet                |
| 33659 | 157635001000027105 | Metoprolol Tartrate/<br>Hydrochlorothiazide | Hydrochlorothiazide with metoprolol tartrate 25mg with 200mg Modified-release tablet |

|       |                    |                                              |                                                                |
|-------|--------------------|----------------------------------------------|----------------------------------------------------------------|
| 8147  | 17805001000027109  | Metoprolol Tartrate/ Chlortalidone           | Lopresoretic Tablet (Novartis Pharmaceuticals UK Ltd)          |
| 15488 | 157605001000027101 | Metoprolol Tartrate/ Chlortalidone           | Metoprolol tartrate with chlortalidone Tablet                  |
| 9143  | 3638411000001101   | Cloпамide/ Pindolol                          | Viskaldix tablets (AMCo)                                       |
| 14057 | 318552000          | Cloпамide/ Pindolol                          | Pindolol 10mg / Cloпамide 5mg tablets                          |
| 581   | 148505001000027107 | Chlortalidone/ Atenolol                      | Atenolol 50mg with Chlortalidone 12.5mg tablets                |
| 1788  | 148515001000027109 | Chlortalidone/ Atenolol                      | Atenolol 100mg with Chlortalidone 25mg tablets                 |
| 16786 | 101705001000027101 | Chlortalidone/ Atenolol                      | Chlortalidone 25mg with Atenolol 100mg tablets                 |
| 19055 | 101695001000027105 | Chlortalidone/ Atenolol                      | Chlortalidone 12.5mg with Atenolol 50mg tablets                |
| 17149 | 4542911000001104   | Bisoprolol fumarate/<br>Hydrochlorothiazide  | Monozide 10 tablets (Wyeth Pharmaceuticals)                    |
| 17462 | 318597009          | Bisoprolol fumarate/<br>Hydrochlorothiazide  | Bisoprolol 10mg / Hydrochlorothiazide 6.25mg tablets           |
| 1124  | 288711000001105    | Atenolol/ Chlortalidone                      | Tenoretic 100mg/ 25mg tablets (AstraZeneca UK Ltd)             |
| 1288  | 825011000001103    | Atenolol/ Chlortalidone                      | Tenoret 50mg/ 12.5mg tablets (AstraZeneca UK Ltd)              |
| 5721  | 377211005          | Atenolol/ Chlortalidone                      | Co-tenidone 100mg/ 25mg tablets                                |
| 9783  | 318575007          | Atenolol/ Chlortalidone                      | Co-tenidone 50mg/ 12.5mg tablets                               |
| 13526 | 101411000001108    | Atenolol/ Chlortalidone                      | Atenix Co 100 tablets (Ashbourne Pharmaceuticals Ltd)          |
| 21873 | 629011000001109    | Atenolol/ Chlortalidone                      | Atenix Co 50 tablets (Ashbourne Pharmaceuticals Ltd)           |
| 24280 | 212825001000027107 | Atenolol/ Chlortalidone                      | Totaretic 100mg+25mg Tablet (C P Pharmaceuticals Ltd)          |
| 26248 | 298311000001107    | Atenolol/ Chlortalidone                      | Tenchor 100mg/ 25mg tablets (Teva UK Ltd)                      |
| 26741 | 212815001000027103 | Atenolol/ Chlortalidone                      | Totaretic 50mg+12.5mg Tablet (C P Pharmaceuticals Ltd)         |
| 31470 | 439411000001104    | Atenolol/ Chlortalidone                      | Tenchor 50mg/ 12.5mg tablets (Teva UK Ltd)                     |
| 31708 | 653811000001101    | Atenolol/ Chlortalidone                      | Co-tenidone 50mg/ 12.5mg tablets (Actavis UK Ltd)              |
| 32094 | 884711000001106    | Atenolol/ Chlortalidone                      | Co-tenidone 50mg/ 12.5mg tablets (A A H Pharmaceuticals Ltd)   |
| 34012 | 134211000001101    | Atenolol/ Chlortalidone                      | Co-tenidone 100mg/ 25mg tablets (IVAX Pharmaceuticals UK Ltd)  |
| 34034 | 576211000001104    | Atenolol/ Chlortalidone                      | Co-tenidone 50mg/ 12.5mg tablets (IVAX Pharmaceuticals UK Ltd) |
| 34449 | 587011000001102    | Atenolol/ Chlortalidone                      | Co-tenidone 50mg/ 12.5mg tablets (Mylan)                       |
| 34825 | 143311000001108    | Atenolol/ Chlortalidone                      | Co-tenidone 50mg/ 12.5mg tablets (Teva UK Ltd)                 |
| 34899 | 793911000001107    | Atenolol/ Chlortalidone                      | Co-tenidone 100mg/ 25mg tablets (A A H Pharmaceuticals Ltd)    |
| 37725 | 594311000001107    | Atenolol/ Chlortalidone                      | Co-tenidone 100mg/ 25mg tablets (Mylan)                        |
| 41572 | 485811000001105    | Atenolol/ Chlortalidone                      | Co-tenidone 100mg/ 25mg tablets (Teva UK Ltd)                  |
| 46952 | 588911000001102    | Atenolol/ Chlortalidone                      | Co-tenidone 100mg/ 25mg tablets (Actavis UK Ltd)               |
| 62537 | 23858011000001104  | Atenolol/ Chlortalidone                      | Co-tenidone 100mg/ 25mg tablets (DE Pharmaceuticals)           |
| 77414 |                    | Atenolol/ Chlortalidone                      | Tenoretic 100mg/ 25mg tablets (Dowelhurst Ltd)                 |
| 77466 |                    | Atenolol/ Chlortalidone                      | Co-tenidone 50mg/ 12.5mg tablets (Kent Pharmaceuticals Ltd)    |
| 9178  | 318560004          | Atenolol/ Bendroflumethiazide                | Atenolol 25mg / Bendroflumethiazide 1.25mg capsules            |
| 18743 | 721411000001106    | Atenolol/ Bendroflumethiazide                | Tenben 25mg/ 1.25mg capsules (Galen Ltd)                       |
| 3526  | 159515001000027103 | Atenolol/ Amiloride /<br>Hydrochlorothiazide | Amiloride with atenolol with hydrochlorothiazide capsules      |
| 4983  | 156785001000027105 | Atenolol/ Amiloride /<br>Hydrochlorothiazide | Atenolol with amiloride and hydrochlorothiazide capsules       |
| 7543  | 237011000001100    | Atenolol/ Amiloride /<br>Hydrochlorothiazide | Kalten capsules (M & A Pharmachem Ltd)                         |

|                                 |                    |                                           |                                                         |
|---------------------------------|--------------------|-------------------------------------------|---------------------------------------------------------|
| 28177                           | 156755001000027103 | Atenolol/ Amiloride / Hydrochlorothiazide | Hydrochlorothiazide with atenolol and amiloride Capsule |
| 8189                            | 878911000001106    | Acebutolol / Hydrochlorothiazide          | Secadrex 200mg/ 12.5mg tablets (Sanofi)                 |
| 14126                           | 318586009          | Acebutolol / Hydrochlorothiazide          | Acebutolol 200mg / Hydrochlorothiazide 12.5mg tablets   |
| 8765                            | 156575001000027104 |                                           | ATENOLOL/ CHLORTHALIDONE 50 MG TAB                      |
| 19003                           | 132525001000027106 |                                           | SPIRONOLACTONE/ PROPRANOLOL 50 MG TAB                   |
| 22151                           |                    |                                           | METOPROLOL 100MG/ CHLORTHALIDONE 12.5MG                 |
| 24520                           | 145355001000027108 |                                           | HYDROCHLOROTHIAZIDE / METOPROLOL TARTRATE 25 MG TAB     |
| 25764                           |                    |                                           | PINDOLOL 10MG/ CLOPAMIDE 5MG                            |
| 27086                           | 188055001000027109 |                                           | NADOLOL 80MG/ BENDROFLUAZIDE 5MG MG TAB                 |
| 41892                           |                    |                                           | METOPROLOL 100MG/ HYDROCHLOROTHIAZ.12.5MG               |
| <b>Calcium channel blockers</b> |                    |                                           |                                                         |
| 700                             | 7418511000001104   | Verapamil                                 | Vera-Til SR 120mg tablets (Tillomed Laboratories Ltd)   |
| 1118                            | 318204006          | Verapamil                                 | Verapamil 40mg tablets                                  |
| 1120                            | 318205007          | Verapamil                                 | Verapamil 80mg tablets                                  |
| 1298                            | 318213008          | Verapamil                                 | Verapamil 240mg modified-release tablets                |
| 1574                            | 36565011000001105  | Verapamil                                 | Verapamil 120mg modified-release capsules               |
| 1747                            | 318206008          | Verapamil                                 | Verapamil 120mg tablets                                 |
| 1748                            | 867011000001103    | Verapamil                                 | Cordilox 120mg tablets (IVAX Pharmaceuticals UK Ltd)    |
| 3057                            | 140411000001109    | Verapamil                                 | Securon 120mg tablets (Abbott Laboratories Ltd)         |
| 3342                            | 540111000001108    | Verapamil                                 | Securon SR 240mg tablets (Mylan)                        |
| 3343                            | 846611000001102    | Verapamil                                 | Half Securon SR 120mg tablets (Mylan)                   |
| 3943                            | 318250009          | Verapamil                                 | Verapamil 240mg modified-release capsules               |
| 6510                            | 219711000001103    | Verapamil                                 | Univer 120mg modified-release capsules (Teva UK Ltd)    |
| 8524                            | 81585001000027101  | Verapamil                                 | Securon 40mg Tablet (Abbott Laboratories Ltd)           |
| 8759                            | 68645001000027109  | Verapamil                                 | Verapamil 120mg modified release tablets                |
| 8884                            | 557111000001106    | Verapamil                                 | Cordilox 40mg tablets (IVAX Pharmaceuticals UK Ltd)     |
| 8945                            | 65411000001102     | Verapamil                                 | Univer 240mg modified-release capsules (Teva UK Ltd)    |
| 8975                            | 36149411000001103  | Verapamil                                 | Verapamil 180mg modified-release capsules               |
| 9569                            | 35367911000001103  | Verapamil                                 | Verapamil 120mg modified-release tablets                |
| 10688                           | 318248001          | Verapamil                                 | Verapamil 160mg tablets                                 |
| 10832                           | 81595001000027102  | Verapamil                                 | Securon 80mg Tablet (Abbott Laboratories Ltd)           |
| 11777                           | 4139411000001106   | Verapamil                                 | Verapamil 40mg/ 5ml oral solution sugar free            |
| 11972                           | 675611000001104    | Verapamil                                 | Vertab SR 240 tablets (Chiesi Ltd)                      |
| 12104                           | 783511000001101    | Verapamil                                 | Cordilox 160mg tablets (IVAX Pharmaceuticals UK Ltd)    |
| 12392                           | 391811000001102    | Verapamil                                 | Univer 180mg modified-release capsules (Teva UK Ltd)    |
| 13251                           | 7418711000001109   | Verapamil                                 | Vera-Til SR 240mg tablets (Tillomed Laboratories Ltd)   |
| 13856                           | 7855011000001100   | Verapamil                                 | Verapress MR 240mg tablets (Actavis UK Ltd)             |
| 13965                           | 740811000001102    | Verapamil                                 | Cordilox MR 240mg tablets (Teva UK Ltd)                 |
| 16328                           | 525311000001101    | Verapamil                                 | Verapress MR 240mg tablets (Dexcel-Pharma Ltd)          |
| 16677                           | 258911000001104    | Verapamil                                 | Cordilox 80mg tablets (IVAX Pharmaceuticals UK Ltd)     |
| 17599                           | 7852611000001103   | Verapamil                                 | Verapress MR 240mg tablets (Sandoz Ltd)                 |

|       |                    |           |                                                                      |
|-------|--------------------|-----------|----------------------------------------------------------------------|
| 19175 | 422111000001103    | Verapamil | Verapamil 40mg tablets (IVAX Pharmaceuticals UK Ltd)                 |
| 19325 | 6105001000027101   | Verapamil | Cordilox 2.5mg/ ml Injection (IVAX Pharmaceuticals UK Ltd)           |
| 19457 | 3634111000001100   | Verapamil | Ranvera MR 240mg tablets (Ranbaxy (UK) Ltd)                          |
| 19459 | 4579511000001103   | Verapamil | Verapamil 240mg modified-release tablets (A A H Pharmaceuticals Ltd) |
| 22826 | 69645001000027106  | Verapamil | Securon 160mg Tablet (Abbott Laboratories Ltd)                       |
| 23872 | 44155001000027103  | Verapamil | Berkatens 40mg Tablet (Berk Pharmaceuticals Ltd)                     |
| 25059 | 44165001000027107  | Verapamil | Berkatens 80mg Tablet (Berk Pharmaceuticals Ltd)                     |
| 26252 | 44225001000027102  | Verapamil | Berkatens 160mg Tablet (Berk Pharmaceuticals Ltd)                    |
| 26674 | 36149611000001100  | Verapamil | Verapamil 5mg/ 2ml solution for injection ampoules                   |
| 27295 | 4399811000001108   | Verapamil | Securon IV 5mg/ 2ml solution for injection ampoules (Mylan)          |
| 28843 | 22045001000027100  | Verapamil | Verapamil hc 80mg Tablet (Celltech Pharma Europe Ltd)                |
| 28844 | 44175001000027100  | Verapamil | Berkatens 120mg Tablet (Berk Pharmaceuticals Ltd)                    |
| 29637 | 10910611000001109  | Verapamil | Verapress MR 240mg tablets (Teva UK Ltd)                             |
| 30462 | 782111000001104    | Verapamil | Ethimil MR 240mg tablets (Genus Pharmaceuticals Ltd)                 |
| 31490 | 4129511000001107   | Verapamil | Zolvera 40mg/ 5ml oral solution (Rosemont Pharmaceuticals Ltd)       |
| 31711 | 100911000001107    | Verapamil | Verapamil 80mg tablets (A A H Pharmaceuticals Ltd)                   |
| 32590 | 90311000001104     | Verapamil | Verapamil 40mg tablets (Mylan)                                       |
| 33471 | 797711000001100    | Verapamil | Verapamil 40mg tablets (Actavis UK Ltd)                              |
| 34959 | 413611000001109    | Verapamil | Verapamil 40mg tablets (A A H Pharmaceuticals Ltd)                   |
| 35729 | 279811000001100    | Verapamil | Verapamil 80mg tablets (Teva UK Ltd)                                 |
| 39009 | 454211000001101    | Verapamil | Verapamil 40mg tablets (Teva UK Ltd)                                 |
| 40405 | 590011000001102    | Verapamil | Verapamil 120mg tablets (Teva UK Ltd)                                |
| 41586 | 7911000001103      | Verapamil | Verapamil 80mg tablets (Actavis UK Ltd)                              |
| 41679 | 534011000001101    | Verapamil | Verapamil 80mg tablets (IVAX Pharmaceuticals UK Ltd)                 |
| 41693 | 485611000001106    | Verapamil | Verapamil 120mg tablets (Mylan)                                      |
| 42625 | 16449211000001100  | Verapamil | Vera-Til SR 120mg tablets (Actavis UK Ltd)                           |
| 43879 | 16438111000001103  | Verapamil | Vera-Til SR 240mg tablets (Actavis UK Ltd)                           |
| 45051 | 66545001000027106  | Verapamil | Verapamil hc 240mg Modified-release tablet (Actavis UK Ltd)          |
| 45308 | 9208311000001103   | Verapamil | Verapamil 240mg modified-release tablets (Mylan)                     |
| 46009 | 887611000001108    | Verapamil | Verapamil 120mg tablets (Kent Pharmaceuticals Ltd)                   |
| 46884 | 136715001000027100 | Verapamil | Verapamil hc 240mg Modified-release tablet (Sandoz Ltd)              |
| 46955 | 803411000001104    | Verapamil | Verapamil 80mg tablets (Mylan)                                       |
| 47222 | 13924111000001102  | Verapamil | Verapamil 120mg modified-release tablets (A A H Pharmaceuticals Ltd) |
| 47230 | 9527111000001101   | Verapamil | Verapamil 240mg modified-release tablets (Teva UK Ltd)               |
| 51461 | 5407511000001101   | Verapamil | Securon SR 240mg tablets (Waymade Healthcare Plc)                    |
| 59264 | 18611011000001108  | Verapamil | Securon SR 240mg tablets (DE Pharmaceuticals)                        |
| 62552 | 223411000001100    | Verapamil | Verapamil 80mg tablets (Alliance Healthcare (Distribution) Ltd)      |
| 67293 | 18633611000001108  | Verapamil | Half Securon SR 120mg tablets (Mawdsley-Brooks & Company Ltd)        |
| 68531 | 13015411000001109  | Verapamil | Verapamil 40mg/ 5ml oral suspension                                  |
| 71009 | 81311000001105     | Verapamil | Verapamil 40mg tablets (Kent Pharmaceuticals Ltd)                    |
| 73467 | 87665001000027108  | Verapamil | Verapamil hc 80mg Tablet (Ranbaxy (UK) Ltd)                          |
| 76547 |                    | Verapamil | Verapamil 80mg tablets (Waymade Healthcare Plc)                      |
| 76554 |                    | Verapamil | Verapamil 120mg modified-release tablets (DE Pharmaceuticals)        |

|       |                    |                     |                                                                     |
|-------|--------------------|---------------------|---------------------------------------------------------------------|
| 77506 |                    | Verapamil           | Verapamil 240mg modified-release tablets (Kent Pharmaceuticals Ltd) |
| 77557 |                    | Verapamil           | Securon SR 240mg tablets (Mawdsley-Brooks & Company Ltd)            |
| 29116 | 237645001000027104 | Perhexiline Maleate | Perhexiline maleate 100mg tablet                                    |
| 61230 | 504305001000027109 | Perhexiline Maleate | Perhexiline maleate 100mg tablets                                   |
| 75641 |                    | Perhexiline Maleate | Pexsig 100mg tablets (Imported (New Zealand))                       |
| 18038 | 36031911000001102  | Nisoldipine         | Nisoldipine 20mg modified-release tablets                           |
| 19129 | 3877011000001100   | Nisoldipine         | Syscor MR 10 tablets (Forest Laboratories UK Ltd)                   |
| 23805 | 36031811000001107  | Nisoldipine         | Nisoldipine 10mg modified-release tablets                           |
| 23823 | 36032011000001109  | Nisoldipine         | Nisoldipine 30mg modified-release tablets                           |
| 31336 | 4069211000001108   | Nisoldipine         | Syscor MR 30 tablets (Forest Laboratories UK Ltd)                   |
| 31337 | 4070011000001100   | Nisoldipine         | Syscor MR 20 tablets (Forest Laboratories UK Ltd)                   |
| 10595 | 3879211000001104   | Nimodipine          | Nimotop 30mg tablets (Bayer Plc)                                    |
| 11547 | 323273000          | Nimodipine          | Nimodipine 30mg tablets                                             |
| 269   | 319222004          | Nifedipine          | Nifedipine 5mg capsules                                             |
| 410   | 319274001          | Nifedipine          | Nifedipine 10mg modified-release tablets                            |
| 452   | 319223009          | Nifedipine          | Nifedipine 10mg capsules                                            |
| 541   | 881811000001100    | Nifedipine          | Adalat LA 20mg tablets (Bayer Plc)                                  |
| 662   | 27111000001107     | Nifedipine          | Adalat 5mg capsules (Bayer Plc)                                     |
| 737   | 319273007          | Nifedipine          | Nifedipine 20mg modified-release capsules                           |
| 1262  | 129175001000027109 | Nifedipine          | Nifedipine 12 20mg Modified-release tablet                          |
| 1300  | 55365001000027100  | Nifedipine          | Nifensar xl 20mg Modified-release tablet (Rhone-Poulenc Rorer Ltd)  |
| 1449  | 214905001000027101 | Nifedipine          | Nifedipine 24 30mg Modified-release tablet                          |
| 1854  | 125735001000027108 | Nifedipine          | Adalat la 30mg Tablet (Bayer Plc)                                   |
| 2280  | 569011000001108    | Nifedipine          | Adalat retard 10mg tablets (Bayer Plc)                              |
| 2343  | 5011000001109      | Nifedipine          | Adalat retard 20mg tablets (Bayer Plc)                              |
| 2521  | 782511000001108    | Nifedipine          | Adalat 10mg capsules (Bayer Plc)                                    |
| 2605  | 319272002          | Nifedipine          | Nifedipine 10mg modified-release capsules                           |
| 2746  | 126411000001108    | Nifedipine          | Coracten SR 10mg capsules (UCB Pharma Ltd)                          |
| 3711  | 74111000001103     | Nifedipine          | Adipine MR 20 tablets (Chiesi Ltd)                                  |
| 3712  | 162811000001100    | Nifedipine          | Coracten XL 30mg capsules (UCB Pharma Ltd)                          |
| 3930  | 319276004          | Nifedipine          | Nifedipine 60mg modified-release tablets                            |
| 4227  | 125745001000027109 | Nifedipine          | Adalat la 60mg Tablet (Bayer Plc)                                   |
| 4239  | 833611000001109    | Nifedipine          | Adipine MR 10 tablets (Chiesi Ltd)                                  |
| 4856  | 389611000001101    | Nifedipine          | Coracten SR 20mg capsules (UCB Pharma Ltd)                          |
| 4939  | 3381511000001105   | Nifedipine          | Coracten XL 60mg capsules (UCB Pharma Ltd)                          |
| 5162  | 319247002          | Nifedipine          | Nifedipine 30mg modified-release capsules                           |
| 5181  | 865011000001105    | Nifedipine          | Angiopine MR 20mg tablets (Ashbourne Pharmaceuticals Ltd)           |
| 5277  | 188711000001108    | Nifedipine          | Fortipine LA 40 tablets (AMCo)                                      |
| 5806  | 385611000001104    | Nifedipine          | Tensipine MR 20 tablets (Thornton & Ross Ltd)                       |
| 7541  | 280811000001100    | Nifedipine          | Nifopress Retard 20mg tablets (AMCo)                                |
| 8213  | 197535001000027103 | Nifedipine          | Nifedipine 24 20mg Modified-release tablet                          |
| 9269  | 319233001          | Nifedipine          | Nifedipine 40mg modified-release tablets                            |
| 9485  | 677411000001108    | Nifedipine          | Hypolar Retard 20 tablets (Sandoz Ltd)                              |



|       |                    |            |                                                                      |
|-------|--------------------|------------|----------------------------------------------------------------------|
| 9553  | 630411000001107    | Nifedipine | Slofedipine XL 60 tablets (Zentiva)                                  |
| 9573  | 2882011000001104   | Nifedipine | Slofedipine XL 30mg tablets (Zentiva)                                |
| 9750  | 319248007          | Nifedipine | Nifedipine 60mg modified-release capsules                            |
| 10135 | 235325001000027108 | Nifedipine | Nifedipress mr 10mg Modified-release tablet (Sandoz Ltd)             |
| 10136 | 619111000001101    | Nifedipine | Nifedipress MR 20 tablets (Dexcel-Pharma Ltd)                        |
| 10246 | 9049911000001105   | Nifedipine | Adipine XL 60mg tablets (Chiesi Ltd)                                 |
| 11512 | 904011000001104    | Nifedipine | Nifedipress MR 10 tablets (Dexcel-Pharma Ltd)                        |
| 11769 | 17011000001100     | Nifedipine | Calchan MR 20 tablets (Ranbaxy (UK) Ltd)                             |
| 12606 | 199885001000027103 | Nifedipine | Nifelease 20mg Modified-release tablet (Eastern Pharmaceuticals Ltd) |
| 12613 | 215915001000027109 | Nifedipine | Unipine xl 30mg Modified-release tablet (Genus Pharmaceuticals Ltd)  |
| 13139 | 9049711000001108   | Nifedipine | Adipine XL 30mg tablets (Chiesi Ltd)                                 |
| 13672 | 568911000001104    | Nifedipine | Angiopine MR 10mg tablets (Ashbourne Pharmaceuticals Ltd)            |
| 13699 | 222575001000027106 | Nifedipine | Angiopine la 40mg Tablet (Ashbourne Pharmaceuticals Ltd)             |
| 14861 | 627111000001104    | Nifedipine | Calchan MR 10 tablets (Ranbaxy (UK) Ltd)                             |
| 15715 | 230875001000027104 | Nifedipine | Genalat retard 20mg Modified-release tablet (Wyeth Pharmaceuticals)  |
| 16073 | 7856211000001104   | Nifedipine | Nifedipress MR 10 tablets (Teva UK Ltd)                              |
| 17325 | 25911000001100     | Nifedipine | Cardilate MR 10mg tablets (Teva UK Ltd)                              |
| 17338 | 227175001000027101 | Nifedipine | Nifedotard 20 mr 20mg Modified-release tablet (Galen Ltd)            |
| 17342 | 234015001000027109 | Nifedipine | Nivaten retard 10mg Modified-release tablet (Actavis UK Ltd)         |
| 17448 | 226035001000027105 | Nifedipine | Nifedipress mr 10mg Modified-release tablet (Sterwin Medicines)      |
| 19170 | 413111000001101    | Nifedipine | Tensipine MR 10 tablets (Thornton & Ross Ltd)                        |
| 20257 | 905711000001103    | Nifedipine | Cardilate MR 20mg tablets (IVAX Pharmaceuticals UK Ltd)              |
| 20311 | 77775001000027106  | Nifedipine | Nifedipress mr 20mg Modified-release tablet (Generics (UK) Ltd)      |
| 20591 | 7856611000001102   | Nifedipine | Nifedipress MR 20 tablets (Teva UK Ltd)                              |
| 20878 | 811311000001107    | Nifedipine | Angiopine 10 capsules (Ashbourne Pharmaceuticals Ltd)                |
| 21216 | 4878111000001101   | Nifedipine | Hypolar Retard 10mg tablets (Sandoz Ltd)                             |
| 21245 | 232035001000027107 | Nifedipine | Nifedipress mr 10mg Modified-release tablet (Actavis UK Ltd)         |
| 21872 | 169635001000027100 | Nifedipine | Angiopine 5mg Capsule (Ashbourne Pharmaceuticals Ltd)                |
| 21886 | 7855311000001102   | Nifedipine | Nifedipress MR 20 tablets (Actavis UK Ltd)                           |
| 22019 | 210265001000027101 | Nifedipine | Calanif 10mg Capsule (Berk Pharmaceuticals Ltd)                      |
| 22142 | 170255001000027101 | Nifedipine | Calcilat 10mg Capsule (Eastern Pharmaceuticals Ltd)                  |
| 22217 | 222315001000027101 | Nifedipine | Nimodrel 10mg modified-release tablet (Opus Pharmaceuticals Ltd)     |
| 22696 | 843411000001105    | Nifedipine | Slofedipine 20mg tablets (Sterwin Medicines)                         |
| 23736 | 2881811000001101   | Nifedipine | Hypolar XL 30 tablets (Sandoz Ltd)                                   |
| 24228 | 222325001000027105 | Nifedipine | Nimodrel 20mg modified-release tablet (Opus Pharmaceuticals Ltd)     |
| 25132 | 9485111000001105   | Nifedipine | Nifopress MR 20mg tablets (Teva UK Ltd)                              |
| 25646 | 234025001000027100 | Nifedipine | Nivaten retard 20mg Modified-release tablet (Actavis UK Ltd)         |
| 25919 | 10054311000001109  | Nifedipine | Nifedipine 20mg modified-release tablets (A A H Pharmaceuticals Ltd) |
| 26265 | 210275001000027108 | Nifedipine | Calanif 5mg Capsule (Berk Pharmaceuticals Ltd)                       |
| 26774 | 242975001000027102 | Nifedipine | Nifedipine 10mg/ 5ml Oral suspension                                 |
| 28688 | 10054111000001107  | Nifedipine | Nifedipine 10mg modified-release tablets (A A H Pharmaceuticals Ltd) |
| 30199 | 319275000          | Nifedipine | Nifedipine 30mg modified-release tablets                             |
| 30473 | 309611000001102    | Nifedipine | Coroday MR 20mg tablets (Mylan)                                      |

|       |                    |            |                                                                                   |
|-------|--------------------|------------|-----------------------------------------------------------------------------------|
| 33025 | 10189111000001106  | Nifedipine | Nimodrel XL 30mg tablets (Zurich Pharmaceuticals)                                 |
| 34101 | 103085001000027109 | Nifedipine | Nifedipine mr 20mg Modified-release tablet (IVAX Pharmaceuticals UK Ltd)          |
| 34115 | 155025001000027103 | Nifedipine | Nifedipine 60mg Modified-release tablet                                           |
| 34146 | 103075001000027104 | Nifedipine | Nifedipine mr 10mg Modified-release tablet (IVAX Pharmaceuticals UK Ltd)          |
| 34187 | 93635001000027105  | Nifedipine | Nifedipine 10mg Modified-release tablet (Generics (UK) Ltd)                       |
| 34247 | 8795001000027103   | Nifedipine | Nifedipine 10mg Capsule (Berk Pharmaceuticals Ltd)                                |
| 34522 | 720511000001103    | Nifedipine | Nifedipine 5mg capsules (A A H Pharmaceuticals Ltd)                               |
| 34607 | 814611000001100    | Nifedipine | Nifedipine 5mg capsules (IVAX Pharmaceuticals UK Ltd)                             |
| 34975 | 168411000001100    | Nifedipine | Nifedipine 5mg capsules (Teva UK Ltd)                                             |
| 35646 | 10751411000001101  | Nifedipine | Neozipine XL 60mg tablets (Kent Pharmaceuticals Ltd)                              |
| 37025 | 319277008          | Nifedipine | Nifedipine 20mg modified-release tablets                                          |
| 37184 | 13401911000001109  | Nifedipine | Valni XL 30mg tablets (Zentiva)                                                   |
| 37530 | 10751211000001100  | Nifedipine | Neozipine XL 30mg tablets (Kent Pharmaceuticals Ltd)                              |
| 37726 | 8670011000001105   | Nifedipine | Nifedipine 100mg/ 5ml oral suspension                                             |
| 38107 | 185705001000027105 | Nifedipine | Nifedipine sr 30mg Tablet (Hillcross Pharmaceuticals Ltd)                         |
| 39800 | 13402111000001101  | Nifedipine | Valni XL 60mg tablets (Zentiva)                                                   |
| 40074 | 129135001000027107 | Nifedipine | Nifedipine 20mg Capsule                                                           |
| 41979 | 232235001000027104 | Nifedipine | Adipine la 30mg Modified-release tablet (Chiesi Ltd)                              |
| 42912 | 295511000001109    | Nifedipine | Nifedipine 10mg capsules (Teva UK Ltd)                                            |
| 43222 | 693311000001101    | Nifedipine | Valni 20 Retard tablets (Tillomed Laboratories Ltd)                               |
| 43410 | 197555001000027104 | Nifedipine | Nifedipine extra 60mg Modified-release tablet                                     |
| 43511 | 498311000001106    | Nifedipine | Nifedipine 10mg capsules (A A H Pharmaceuticals Ltd)                              |
| 43515 | 639811000001100    | Nifedipine | Nifedipine 10mg capsules (Actavis UK Ltd)                                         |
| 43753 | 2881311000001105   | Nifedipine | Adalat LA 30mg tablets (Bayer Plc)                                                |
| 43818 | 235511000001104    | Nifedipine | Adalat LA 60mg tablets (Bayer Plc)                                                |
| 45685 | 17666011000001106  | Nifedipine | Adanif XL 30mg tablets (Focus Pharmaceuticals Ltd)                                |
| 46445 | 652811000001109    | Nifedipine | Nifedipine 10mg capsules (IVAX Pharmaceuticals UK Ltd)                            |
| 46887 | 17666211000001101  | Nifedipine | Adanif XL 60mg tablets (Focus Pharmaceuticals Ltd)                                |
| 47027 | 116995001000027105 | Nifedipine | Nifedipine 10mg Modified-release tablet (Kent Pharmaceuticals Ltd)                |
| 47217 | 232245001000027103 | Nifedipine | Adipine la 60mg Modified-release tablet (Chiesi Ltd)                              |
| 47285 | 185845001000027103 | Nifedipine | Nifedipine xl 60mg Tablet (Hillcross Pharmaceuticals Ltd)                         |
| 47529 | 9096811000001100   | Nifedipine | Nifedipine 20mg/ ml oral drops                                                    |
| 47614 | 10639711000001103  | Nifedipine | Nifedipine 30mg modified-release tablets (A A H Pharmaceuticals Ltd)              |
| 47707 | 247555001000027108 | Nifedipine | Nifedipine Oral solution                                                          |
| 47887 | 10189311000001108  | Nifedipine | Nimodrel XL 60mg tablets (Zurich Pharmaceuticals)                                 |
| 49338 | 10056111000001100  | Nifedipine | Nifedipine 20mg modified-release tablets (Alliance Healthcare (Distribution) Ltd) |
| 49762 | 10055911000001109  | Nifedipine | Nifedipine 10mg modified-release tablets (Alliance Healthcare (Distribution) Ltd) |
| 51917 | 14043411000001104  | Nifedipine | Adalat LA 60 tablets (Sigma Pharmaceuticals Plc)                                  |
| 52017 | 17489111000001103  | Nifedipine | Adalat LA 30 tablets (Mawdsley-Brooks & Company Ltd)                              |
| 53278 | 17574611000001108  | Nifedipine | Adalat LA 30 tablets (Necessity Supplies Ltd)                                     |
| 53357 | 8670111000001106   | Nifedipine | Nifedipine 10mg/ 5ml oral suspension                                              |
| 53500 | 13824711000001105  | Nifedipine | Adalat LA 30 tablets (DE Pharmaceuticals)                                         |
| 53629 | 16135011000001106  | Nifedipine | Adalat retard 20mg tablets (Lexon (UK) Ltd)                                       |

|       |                    |             |                                                                             |
|-------|--------------------|-------------|-----------------------------------------------------------------------------|
| 53990 | 8670311000001108   | Nifedipine  | Nifedipine 5mg/ 5ml oral suspension                                         |
| 55455 | 18283911000001107  | Nifedipine  | Nifedipine 10mg capsules (Strides Shasun (UK) Ltd)                          |
| 55824 | 88575001000027100  | Nifedipine  | Nifedipine 20mg Modified-release tablet (Berk Pharmaceuticals Ltd)          |
| 56469 | 17575011000001102  | Nifedipine  | Adalat LA 60 tablets (Necessity Supplies Ltd)                               |
| 57531 | 5335911000001104   | Nifedipine  | Adalat LA 60 tablets (Waymade Healthcare Plc)                               |
| 57653 | 14043011000001108  | Nifedipine  | Adalat LA 20 tablets (Sigma Pharmaceuticals Plc)                            |
| 58557 | 17574211000001106  | Nifedipine  | Adalat LA 20 tablets (Necessity Supplies Ltd)                               |
| 58990 | 21868911000001101  | Nifedipine  | Nifedipine 10mg modified-release tablets (Cubic Pharmaceuticals Ltd)        |
| 59163 | 21868511000001108  | Nifedipine  | Nifedipine 20mg modified-release tablets (Cubic Pharmaceuticals Ltd)        |
| 60856 | 24102511000001108  | Nifedipine  | Nifedipine 10mg modified-release tablets (Sigma Pharmaceuticals Plc)        |
| 63041 | 868811000001108    | Nifedipine  | Nifedipine 10mg capsules (Mylan)                                            |
| 63246 | 28407711000001101  | Nifedipine  | Nifedipine 10mg modified-release tablets (AM Distributions (Yorkshire) Ltd) |
| 66191 | 13825311000001105  | Nifedipine  | Adalat retard 20mg tablets (DE Pharmaceuticals)                             |
| 66236 | 117035001000027106 | Nifedipine  | Nifedipine 20mg Modified-release tablet (Kent Pharmaceuticals Ltd)          |
| 67074 | 13824311000001106  | Nifedipine  | Adalat 10mg capsules (DE Pharmaceuticals)                                   |
| 69202 | 12862411000001109  | Nifedipine  | Nifedipine 2mg/ 5ml oral suspension                                         |
| 69668 | 12862511000001108  | Nifedipine  | Nifedipine 30mg/ 5ml oral suspension                                        |
| 71339 | 5439111000001108   | Nifedipine  | Adalat LA 30 tablets (Dowelhurst Ltd)                                       |
| 71601 | 12303311000001109  | Nifedipine  | Nifedipine 2.5mg/ 5ml oral suspension                                       |
| 71653 | 34685811000001103  | Nifedipine  | Nidef 60mg modified-release tablets (Morningside Healthcare Ltd)            |
| 71760 | 24615511000001100  | Nifedipine  | Nifedipine 10mg modified-release tablets (Ethigen Ltd)                      |
| 72253 | 24102911000001101  | Nifedipine  | Nifedipine 30mg modified-release tablets (Sigma Pharmaceuticals Plc)        |
| 72321 | 34685211000001104  | Nifedipine  | Nidef 30mg modified-release tablets (Morningside Healthcare Ltd)            |
| 73992 | 5440311000001102   | Nifedipine  | Adalat LA 60 tablets (Dowelhurst Ltd)                                       |
| 74001 | 10459411000001108  | Nifedipine  | Adalat LA 20 tablets (Dowelhurst Ltd)                                       |
| 74061 | 5335411000001107   | Nifedipine  | Adalat LA 30 tablets (Waymade Healthcare Plc)                               |
| 74330 | 26854411000001105  | Nifedipine  | Nifedipine 20mg modified-release tablets (Ennogen Healthcare Ltd)           |
| 74648 | 8835001000027107   | Nifedipine  | Nifedipine 10mg Capsule (C P Pharmaceuticals Ltd)                           |
| 75109 | 88585001000027105  | Nifedipine  | Nifedipine 10mg Modified-release tablet (Berk Pharmaceuticals Ltd)          |
| 76488 |                    | Nifedipine  | Nifedipine 5mg capsules (Strides Pharma UK Ltd)                             |
| 76539 |                    | Nifedipine  | Nifedipin-ratiopharm 20mg/ ml oral drops (Imported (Germany))               |
| 77134 |                    | Nifedipine  | Adalat 10mg capsules (Lexon (UK) Ltd)                                       |
| 77418 |                    | Nifedipine  | Adalat retard 20mg tablets (Waymade Healthcare Plc)                         |
| 77447 |                    | Nifedipine  | Adalat 10mg capsules (Necessity Supplies Ltd)                               |
| 77555 |                    | Nifedipine  | Adalat LA 30 tablets (Sigma Pharmaceuticals Plc)                            |
| 77962 |                    | Nifedipine  | Adalat LA 20 tablets (Lexon (UK) Ltd)                                       |
| 2926  | 319217004          | Nicardipine | Nicardipine 20mg capsules                                                   |
| 3302  | 540311000001105    | Nicardipine | Cardene SR 30mg capsules (Astellas Pharma Ltd)                              |
| 5477  | 319216008          | Nicardipine | Nicardipine 30mg modified-release capsules                                  |
| 7562  | 291111000001102    | Nicardipine | Cardene 30mg capsules (Astellas Pharma Ltd)                                 |
| 8201  | 319218009          | Nicardipine | Nicardipine 30mg capsules                                                   |
| 9386  | 319215007          | Nicardipine | Nicardipine 45mg modified-release capsules                                  |
| 11943 | 344811000001108    | Nicardipine | Cardene 20mg capsules (Astellas Pharma Ltd)                                 |

|       |                    |               |                                                                     |
|-------|--------------------|---------------|---------------------------------------------------------------------|
| 12875 | 118811000001102    | Nicardipine   | Cardene SR 45mg capsules (Astellas Pharma Ltd)                      |
| 45292 | 743711000001101    | Nicardipine   | Nicardipine 30mg capsules (A A H Pharmaceuticals Ltd)               |
| 73646 | 13760311000001107  | Nicardipine   | Nicardipine 20mg capsules (Tillomed Laboratories Ltd)               |
| 73968 | 3656311000001105   | Nicardipine   | Nicardipine 20mg capsules (Teva UK Ltd)                             |
| 1529  | 226015001000027104 | Mibefradil    | Posicor 50mg Tablet (Roche Products Ltd)                            |
| 3931  | 226025001000027108 | Mibefradil    | Posicor 100mg Tablet (Roche Products Ltd)                           |
| 15652 | 226705001000027103 | Mibefradil    | Mibefradil 50mg Tablet                                              |
| 22241 | 226715001000027101 | Mibefradil    | Mibefradil 100mg Tablet                                             |
| 19013 | 155925001000027108 | Lidoflazine   | Clinium 120mg Tablet (LEO Pharma)                                   |
| 30758 | 155905001000027101 | Lidoflazine   | Lidoflazine 120mg Tablet                                            |
| 5570  | 20011000001105     | Lercanidipine | Zanidip 10mg tablets (Recordati Pharmaceuticals Ltd)                |
| 5593  | 319316005          | Lercanidipine | Lercanidipine 10mg tablets                                          |
| 13243 | 10225911000001102  | Lercanidipine | Lercanidipine 20mg tablets                                          |
| 14300 | 10198711000001102  | Lercanidipine | Zanidip 20mg tablets (Recordati Pharmaceuticals Ltd)                |
| 47331 | 16666611000001103  | Lercanidipine | Lercanidipine 10mg tablets (Mylan)                                  |
| 56767 | 16666411000001101  | Lercanidipine | Lercanidipine 20mg tablets (Mylan)                                  |
| 57444 | 22337311000001108  | Lercanidipine | Lercanidipine 10mg tablets (Aptil Pharma Ltd)                       |
| 59233 | 16607211000001104  | Lercanidipine | Lercanidipine 20mg tablets (Actavis UK Ltd)                         |
| 61611 | 24363711000001103  | Lercanidipine | Lercanidipine 10mg tablets (DE Pharmaceuticals)                     |
| 63917 | 16732211000001104  | Lercanidipine | Lercanidipine 20mg tablets (A A H Pharmaceuticals Ltd)              |
| 64227 | 16606811000001100  | Lercanidipine | Lercanidipine 10mg tablets (Actavis UK Ltd)                         |
| 64424 | 16640011000001100  | Lercanidipine | Lercanidipine 20mg tablets (Zentiva)                                |
| 65659 | 16726111000001106  | Lercanidipine | Lercanidipine 20mg tablets (Teva UK Ltd)                            |
| 69239 | 16732011000001109  | Lercanidipine | Lercanidipine 10mg tablets (A A H Pharmaceuticals Ltd)              |
| 70732 | 15608611000001100  | Lercanidipine | Lercanidipine 20mg tablets (Alliance Healthcare (Distribution) Ltd) |
| 70827 | 16725911000001102  | Lercanidipine | Lercanidipine 10mg tablets (Teva UK Ltd)                            |
| 71018 | 20911211000001100  | Lercanidipine | Lercanidipine 10mg tablets (Arrow Generics Ltd)                     |
| 71030 | 20911411000001101  | Lercanidipine | Lercanidipine 20mg tablets (Arrow Generics Ltd)                     |
| 76672 |                    | Lercanidipine | Lercanidipine 20mg tablets (Sigma Pharmaceuticals Plc)              |
| 77363 |                    | Lercanidipine | Zanidip 10mg tablets (Dowelhurst Ltd)                               |
| 3221  | 319301007          | Lacidipine    | Lacidipine 4mg tablets                                              |
| 5158  | 319300008          | Lacidipine    | Lacidipine 2mg tablets                                              |
| 9670  | 333011000001100    | Lacidipine    | Motens 4mg tablets (GlaxoSmithKline UK Ltd)                         |
| 11966 | 910911000001108    | Lacidipine    | Motens 2mg tablets (GlaxoSmithKline UK Ltd)                         |
| 56994 | 18565211000001108  | Lacidipine    | Lacidipine 4mg tablets (Teva UK Ltd)                                |
| 57680 | 18642611000001102  | Lacidipine    | Lacidipine 4mg tablets (A A H Pharmaceuticals Ltd)                  |
| 60699 | 14736811000001107  | Lacidipine    | Lacidipine 2mg tablets (Sigma Pharmaceuticals Plc)                  |
| 70990 | 18642411000001100  | Lacidipine    | Lacidipine 2mg tablets (A A H Pharmaceuticals Ltd)                  |
| 77450 |                    | Lacidipine    | Motens 2mg tablets (Lexon (UK) Ltd)                                 |
| 8257  | 3689711000001108   | Isradipine    | Prescal 2.5mg tablets (Novartis Pharmaceuticals UK Ltd)             |
| 8310  | 319280009          | Isradipine    | Isradipine 2.5mg tablets                                            |
| 491   | 319291002          | Felodipine    | Felodipine 2.5mg modified-release tablets                           |
| 501   | 319287007          | Felodipine    | Felodipine 5mg modified-release tablets                             |

|       |                    |            |                                                                                 |
|-------|--------------------|------------|---------------------------------------------------------------------------------|
| 568   | 319288002          | Felodipine | Felodipine 10mg modified-release tablets                                        |
| 7280  | 48511000001101     | Felodipine | Plendil 10mg modified-release tablets (AstraZeneca UK Ltd)                      |
| 9334  | 562711000001104    | Felodipine | Plendil 2.5mg modified-release tablets (AstraZeneca UK Ltd)                     |
| 9437  | 490211000001101    | Felodipine | Plendil 5mg modified-release tablets (AstraZeneca UK Ltd)                       |
| 10153 | 235995001000027107 | Felodipine | Felendil xl 5mg Modified-release tablet (Ratiopharm UK Ltd)                     |
| 14305 | 5638811000001106   | Felodipine | Vascalpha 10mg modified-release tablets (Actavis UK Ltd)                        |
| 17557 | 4785111000001103   | Felodipine | Felotens XL 5mg tablets (Thornton & Ross Ltd)                                   |
| 17566 | 4785511000001107   | Felodipine | Felotens XL 10mg tablets (Thornton & Ross Ltd)                                  |
| 20459 | 236005001000027102 | Felodipine | Felendil xl 10mg Modified-release tablet (Ratiopharm UK Ltd)                    |
| 24365 | 7887011000001104   | Felodipine | Cardioplén XL 5mg tablets (Chiesi Ltd)                                          |
| 24366 | 7887511000001107   | Felodipine | Cardioplén XL 10mg tablets (Chiesi Ltd)                                         |
| 25572 | 4972811000001103   | Felodipine | Felogen XL 5mg tablets (Mylan)                                                  |
| 26337 | 3800711000001105   | Felodipine | Cabren 10mg modified-release tablets (Teva UK Ltd)                              |
| 28721 | 8090111000001106   | Felodipine | Neofel XL 5mg tablets (Kent Pharmaceuticals Ltd)                                |
| 29044 | 8089811000001107   | Felodipine | Neofel XL 10mg tablets (Kent Pharmaceuticals Ltd)                               |
| 29145 | 243075001000027100 | Felodipine | Felendil xl 2.5mg Modified-release tablet (Ratiopharm UK Ltd)                   |
| 30557 | 4973011000001100   | Felodipine | Felogen XL 10mg tablets (Mylan)                                                 |
| 30915 | 3800311000001106   | Felodipine | Cabren 2.5mg modified-release tablets (Teva UK Ltd)                             |
| 30991 | 3800511000001100   | Felodipine | Cabren 5mg modified-release tablets (Teva UK Ltd)                               |
| 32922 | 152805001000027108 | Felodipine | Felodipine 10mg Modified-release tablet (Sandoz Ltd)                            |
| 33091 | 16183811000001106  | Felodipine | Felodipine 10mg modified-release tablets (A A H Pharmaceuticals Ltd)            |
| 33932 | 7387911000001103   | Felodipine | Parmid XL 5mg tablets (Sandoz Ltd)                                              |
| 35084 | 5638311000001102   | Felodipine | Vascalpha 5mg modified-release tablets (Actavis UK Ltd)                         |
| 35592 | 11506711000001103  | Felodipine | Cardioplén XL 2.5mg tablets (Chiesi Ltd)                                        |
| 36620 | 7388311000001103   | Felodipine | Parmid XL 10mg tablets (Sandoz Ltd)                                             |
| 37897 | 13127311000001107  | Felodipine | Felotens XL 2.5mg tablets (Thornton & Ross Ltd)                                 |
| 38434 | 10284611000001100  | Felodipine | Keloc SR 10mg tablets (Teva UK Ltd)                                             |
| 39357 | 11493211000001105  | Felodipine | Neofel XL 2.5mg tablets (Kent Pharmaceuticals Ltd)                              |
| 40633 | 18250911000001108  | Felodipine | Vascalpha 5mg modified-release tablets (Almus Pharmaceuticals Ltd)              |
| 43394 | 9359611000001103   | Felodipine | Pinefeld XL 10mg tablets (Tillomed Laboratories Ltd)                            |
| 43512 | 16183611000001107  | Felodipine | Felodipine 5mg modified-release tablets (A A H Pharmaceuticals Ltd)             |
| 43790 | 18252511000001100  | Felodipine | Vascalpha 10mg modified-release tablets (Almus Pharmaceuticals Ltd)             |
| 44859 | 142895001000027103 | Felodipine | Felodipine sr 5mg Tablet (Approved Prescription Services Ltd)                   |
| 48009 | 152785001000027109 | Felodipine | Felodipine 5mg Modified-release tablet (Sandoz Ltd)                             |
| 55306 | 5008511000001107   | Felodipine | Folpik XL 5mg tablets (Teva UK Ltd)                                             |
| 55740 | 18167311000001103  | Felodipine | Neofel XL 2.5mg tablets (Actavis UK Ltd)                                        |
| 58339 | 18681211000001100  | Felodipine | Neofel XL 2.5mg tablets (Almus Pharmaceuticals Ltd)                             |
| 60569 | 23594111000001104  | Felodipine | Felodipine 2.5mg modified-release tablets (Waymade Healthcare Plc)              |
| 60652 | 24221811000001105  | Felodipine | Parmid XL 2.5mg tablets (Sandoz Ltd)                                            |
| 60884 | 23916011000001102  | Felodipine | Felodipine 2.5mg modified-release tablets (Phoenix Healthcare Distribution Ltd) |
| 63331 | 13565311000001101  | Felodipine | Folpik XL 2.5mg tablets (Teva UK Ltd)                                           |
| 64474 | 16183411000001109  | Felodipine | Felodipine 2.5mg modified-release tablets (A A H Pharmaceuticals Ltd)           |
| 64504 | 17621211000001102  | Felodipine | Plendil 5mg modified-release tablets (Necessity Supplies Ltd)                   |

|       |                    |            |                                                                                |
|-------|--------------------|------------|--------------------------------------------------------------------------------|
| 64719 | 29860311000001105  | Felodipine | Felodipine 2.5mg modified-release tablets (Sigma Pharmaceuticals Plc)          |
| 64760 | 23915811000001100  | Felodipine | Felodipine 10mg modified-release tablets (Phoenix Healthcare Distribution Ltd) |
| 64917 | 23594511000001108  | Felodipine | Felodipine 10mg modified-release tablets (Waymade Healthcare Plc)              |
| 65349 | 5008911000001100   | Felodipine | Folpik XL 10mg tablets (Teva UK Ltd)                                           |
| 66095 | 30127711000001105  | Felodipine | Felodipine 5mg modified-release tablets (Mawdsley-Brooks & Company Ltd)        |
| 66910 | 30822411000001105  | Felodipine | Felodipine 2.5mg modified-release tablets (DE Pharmaceuticals)                 |
| 68181 | 29860511000001104  | Felodipine | Felodipine 5mg modified-release tablets (Sigma Pharmaceuticals Plc)            |
| 68499 | 142935001000027102 | Felodipine | Felodipine sr 10mg Tablet (Approved Prescription Services Ltd)                 |
| 68828 | 23977111000001107  | Felodipine | Felodipine 5mg modified-release tablets (DE Pharmaceuticals)                   |
| 69206 | 18029311000001107  | Felodipine | Felodipine 2.5mg/ 5ml oral solution                                            |
| 72181 | 18029411000001100  | Felodipine | Felodipine 5mg/ 5ml oral solution                                              |
| 72221 | 23594311000001102  | Felodipine | Felodipine 5mg modified-release tablets (Waymade Healthcare Plc)               |
| 73715 | 23915611000001104  | Felodipine | Felodipine 5mg modified-release tablets (Phoenix Healthcare Distribution Ltd)  |
| 74004 | 5575011000001104   | Felodipine | Plendil 5mg modified-release tablets (Dowelhurst Ltd)                          |
| 74012 | 5401711000001102   | Felodipine | Plendil 2.5mg modified-release tablets (Waymade Healthcare Plc)                |
| 75345 | 34447411000001102  | Felodipine | Felodipine 2.5mg/ 5ml oral suspension                                          |
| 219   | 418945005          | Diltiazem  | Diltiazem 120mg modified-release tablets                                       |
| 517   | 71075001000027107  | Diltiazem  | Adizem sr 120mg Modified-release capsule (Napp Pharmaceuticals Ltd)            |
| 536   | 111175001000027101 | Diltiazem  | Tildiem la 200mg Modified-release capsule (Sanofi)                             |
| 636   | 319185009          | Diltiazem  | Diltiazem 60mg modified-release capsules                                       |
| 793   | 196035001000027100 | Diltiazem  | Adizem xl 240mg Capsule (Napp Pharmaceuticals Ltd)                             |
| 939   | 103611000001105    | Diltiazem  | Tildiem Retard 90mg tablets (Sanofi)                                           |
| 1130  | 407011000001105    | Diltiazem  | Viazem XL 300mg capsules (Thornton & Ross Ltd)                                 |
| 1289  | 383911000001109    | Diltiazem  | Tildiem Retard 120mg tablets (Sanofi)                                          |
| 1538  | 155445001000027109 | Diltiazem  | Diltiazem 60mg tablets                                                         |
| 1686  | 319182007          | Diltiazem  | Diltiazem 90mg modified-release capsules                                       |
| 1836  | 319205001          | Diltiazem  | Diltiazem 60mg modified-release tablets                                        |
| 1995  | 71715001000027101  | Diltiazem  | Diltiazem 12hr 120mg modified-release capsules                                 |
| 2453  | 155455001000027107 | Diltiazem  | Diltiazem 60mg modified-release capsules                                       |
| 2528  | 130211000001109    | Diltiazem  | Slozem 120mg capsules (Merck Serono Ltd)                                       |
| 2592  | 32311000001105     | Diltiazem  | Viazem XL 120mg capsules (Thornton & Ross Ltd)                                 |
| 2663  | 181565001000027106 | Diltiazem  | Diltiazem 240mg modified-release capsules                                      |
| 2686  | 196445001000027108 | Diltiazem  | Diizem xl mr 240mg Modified-release capsule (Elan Pharma)                      |
| 2811  | 71085001000027102  | Diltiazem  | Adizem sr 180mg Modified-release capsule (Napp Pharmaceuticals Ltd)            |
| 2888  | 762011000001102    | Diltiazem  | Tildiem 60mg modified-release tablets (Sanofi)                                 |
| 3061  | 71725001000027105  | Diltiazem  | Diltiazem 12hr 180mg modified-release capsules                                 |
| 3118  | 181545001000027100 | Diltiazem  | Adizem sr 90mg Modified-release capsule (Napp Pharmaceuticals Ltd)             |
| 3370  | 196425001000027105 | Diltiazem  | Diizem xl mr 120mg Modified-release capsule (Elan Pharma)                      |
| 3676  | 196435001000027107 | Diltiazem  | Diizem xl mr 180mg Modified-release capsule (Elan Pharma)                      |
| 4308  | 193225001000027104 | Diltiazem  | Diizem sr 90mg Capsule (Elan Pharma)                                           |
| 4408  | 599811000001104    | Diltiazem  | Slozem 240mg capsules (Merck Serono Ltd)                                       |
| 4635  | 319187001          | Diltiazem  | Diltiazem 200mg modified-release capsules                                      |
| 4732  | 319180004          | Diltiazem  | Diltiazem 90mg modified-release tablets                                        |

|       |                    |           |                                                                        |
|-------|--------------------|-----------|------------------------------------------------------------------------|
| 4808  | 319186005          | Diltiazem | Diltiazem 240mg modified-release capsules                              |
| 4852  | 181525001000027103 | Diltiazem | Adizem sr 120mg Modified-release tablet (Napp Pharmaceuticals Ltd)     |
| 4923  | 197585001000027106 | Diltiazem | Diltiazem 24hr 180mg modified-release capsules                         |
| 5054  | 336611000001101    | Diltiazem | Angitil SR 180 capsules (Ethypharm UK Ltd)                             |
| 5194  | 193235001000027102 | Diltiazem | Dilzem sr 120mg Capsule (Elan Pharma)                                  |
| 5234  | 119211000001108    | Diltiazem | Slozem 180mg capsules (Merck Serono Ltd)                               |
| 5296  | 111165001000027108 | Diltiazem | Tildiem la 300mg Modified-release capsule (Sanofi)                     |
| 5326  | 198095001000027102 | Diltiazem | Diltiazem 24hr 300mg modified-release capsules                         |
| 5348  | 319181000          | Diltiazem | Diltiazem 300mg modified-release capsules                              |
| 5513  | 193215001000027108 | Diltiazem | Dilzem sr 60mg Capsule (Elan Pharma)                                   |
| 6309  | 71095001000027103  | Diltiazem | Adizem xl 300mg Capsule (Napp Pharmaceuticals Ltd)                     |
| 7398  | 648211000001107    | Diltiazem | Viazem XL 360mg capsules (Thornton & Ross Ltd)                         |
| 8558  | 196015001000027106 | Diltiazem | Adizem xl 120mg Capsule (Napp Pharmaceuticals Ltd)                     |
| 9240  | 196025001000027102 | Diltiazem | Adizem xl 180mg Capsule (Napp Pharmaceuticals Ltd)                     |
| 9374  | 181535001000027101 | Diltiazem | Adizem 60mg Modified-release tablet (Napp Pharmaceuticals Ltd)         |
| 9410  | 298811000001103    | Diltiazem | Angitil SR 120 capsules (Ethypharm UK Ltd)                             |
| 9708  | 197575001000027101 | Diltiazem | Diltiazem 24hr 120mg modified-release capsules                         |
| 9723  | 219611000001107    | Diltiazem | Calcicard CR 90mg tablets (Teva UK Ltd)                                |
| 10267 | 2886511000001108   | Diltiazem | Adizem-XL 200mg capsules (Napp Pharmaceuticals Ltd)                    |
| 11223 | 857011000001109    | Diltiazem | Angitil SR 90 capsules (Ethypharm UK Ltd)                              |
| 11770 | 417111000001109    | Diltiazem | Dilzem SR 60 capsules (Teva UK Ltd)                                    |
| 11922 | 8456911000001108   | Diltiazem | Diltiazem 60mg/ 5ml oral suspension                                    |
| 11973 | 104111000001100    | Diltiazem | Calcicard CR 120mg tablets (Teva UK Ltd)                               |
| 12639 | 70315001000027107  | Diltiazem | Diltiazem 90mg Modified-release tablet (Actavis UK Ltd)                |
| 12705 | 440711000001104    | Diltiazem | Angiozem CR 90mg tablets (Ashbourne Pharmaceuticals Ltd)               |
| 13027 | 886511000001107    | Diltiazem | Viazem XL 240mg capsules (Thornton & Ross Ltd)                         |
| 13033 | 75111000001104     | Diltiazem | Angitil XL 240 capsules (Ethypharm UK Ltd)                             |
| 13075 | 254911000001106    | Diltiazem | Dilzem XL 180 capsules (Teva UK Ltd)                                   |
| 13127 | 733511000001107    | Diltiazem | Dilzem XL 240 capsules (Teva UK Ltd)                                   |
| 13240 | 243111000001108    | Diltiazem | Dilzem XL 120 capsules (Teva UK Ltd)                                   |
| 13302 | 682311000001105    | Diltiazem | Dilzem SR 90 capsules (Teva UK Ltd)                                    |
| 13410 | 672311000001103    | Diltiazem | Angiozem 60mg modified-release tablets (Ashbourne Pharmaceuticals Ltd) |
| 13926 | 319198000          | Diltiazem | Diltiazem 360mg modified-release capsules                              |
| 15221 | 199355001000027107 | Diltiazem | Dilcardia xl 180mg Modified-release capsule (Generics (UK) Ltd)        |
| 15288 | 467111000001105    | Diltiazem | Angitil XL 300 capsules (Ethypharm UK Ltd)                             |
| 16038 | 5711000001106      | Diltiazem | Dilzem SR 120 capsules (Teva UK Ltd)                                   |
| 16850 | 144811000001101    | Diltiazem | Angiozem CR 120mg tablets (Ashbourne Pharmaceuticals Ltd)              |
| 17406 | 813611000001103    | Diltiazem | Zemtard 180 XL capsules (Galen Ltd)                                    |
| 17425 | 105211000001107    | Diltiazem | Zemtard 120 XL capsules (Galen Ltd)                                    |
| 17492 | 866811000001107    | Diltiazem | Zemtard 300 XL capsules (Galen Ltd)                                    |
| 17586 | 550211000001104    | Diltiazem | Slozem 300mg capsules (Merck Serono Ltd)                               |
| 17666 | 33211000001108     | Diltiazem | Viazem XL 180mg capsules (Thornton & Ross Ltd)                         |
| 18379 | 353011000001101    | Diltiazem | Dilcardia SR 90mg capsules (Mylan)                                     |

|       |                    |           |                                                                          |
|-------|--------------------|-----------|--------------------------------------------------------------------------|
| 18403 | 95745001000027106  | Diltiazem | Diltiazem 180mg Modified-release capsule (Hillcross Pharmaceuticals Ltd) |
| 18404 | 4772111000001102   | Diltiazem | Diltiazem 60mg modified-release capsules (A A H Pharmaceuticals Ltd)     |
| 18830 | 256611000001109    | Diltiazem | Disogram SR 90mg capsules (Ranbaxy (UK) Ltd)                             |
| 18834 | 469811000001106    | Diltiazem | Disogram SR 60mg capsules (Ranbaxy (UK) Ltd)                             |
| 18852 | 116711000001106    | Diltiazem | Disogram SR 120mg capsules (Ranbaxy (UK) Ltd)                            |
| 18874 | 713411000001103    | Diltiazem | Disogram SR 180mg capsules (Ranbaxy (UK) Ltd)                            |
| 18975 | 152715001000027107 | Diltiazem | Calcicard 60mg Tablet (3M Health Care Ltd)                               |
| 19426 | 108711000001107    | Diltiazem | Disogram SR 240mg capsules (Ranbaxy (UK) Ltd)                            |
| 19440 | 34711000001104     | Diltiazem | Disogram SR 300mg capsules (Ranbaxy (UK) Ltd)                            |
| 20642 | 228225001000027107 | Diltiazem | Bi-carzem sr 60mg Modified-release capsule (Tillomed Laboratories Ltd)   |
| 20890 | 345411000001107    | Diltiazem | Zemtard 240 XL capsules (Galen Ltd)                                      |
| 21145 | 937011000001101    | Diltiazem | Dilcardia SR 60mg capsules (Mylan)                                       |
| 21763 | 215411000001106    | Diltiazem | Diltiazem 60mg modified-release tablets (A A H Pharmaceuticals Ltd)      |
| 21773 | 96705001000027103  | Diltiazem | Diltiazem 60mg Tablet (Generics (UK) Ltd)                                |
| 21778 | 391911000001107    | Diltiazem | Diltiazem 60mg modified-release tablets (Teva UK Ltd)                    |
| 21795 | 865711000001107    | Diltiazem | Retalzem 60 modified-release tablets (Kent Pharmaceuticals Ltd)          |
| 21918 | 527711000001108    | Diltiazem | Optil 60mg modified-release tablets (Opus Pharmaceuticals Ltd)           |
| 22619 | 155475001000027105 | Diltiazem | Britiazim 60mg Modified-release tablet (Thames Laboratories Ltd)         |
| 23233 | 228235001000027109 | Diltiazem | Bi-carzem sr 90mg Modified-release capsule (Tillomed Laboratories Ltd)   |
| 23733 | 159965001000027107 | Diltiazem | Optil sr 90mg Modified-release capsule (Opus Pharmaceuticals Ltd)        |
| 25777 | 723811000001107    | Diltiazem | Dilcardia SR 120mg capsules (Mylan)                                      |
| 26267 | 159975001000027100 | Diltiazem | Optil sr 120mg Modified-release capsule (Opus Pharmaceuticals Ltd)       |
| 26269 | 159985001000027105 | Diltiazem | Optil sr 180mg Modified-release capsule (Opus Pharmaceuticals Ltd)       |
| 26270 | 203585001000027108 | Diltiazem | Optil xl 300mg Modified-release capsule (Opus Pharmaceuticals Ltd)       |
| 26309 | 203575001000027103 | Diltiazem | Optil xl 240mg Modified-release capsule (Opus Pharmaceuticals Ltd)       |
| 26460 | 199365001000027103 | Diltiazem | Dilcardia xl 240mg Modified-release capsule (Generics (UK) Ltd)          |
| 26463 | 215655001000027103 | Diltiazem | Zemret xl 240mg Capsule (Neo Laboratories Ltd)                           |
| 26759 | 721811000001108    | Diltiazem | Zildil SR 60mg capsules (Chanelle Medical UK Ltd)                        |
| 27135 | 155305001000027109 | Diltiazem | Diltiazem sr 90mg Capsule (Hillcross Pharmaceuticals Ltd)                |
| 27136 | 10065211000001107  | Diltiazem | Diltiazem 90mg modified-release tablets (A A H Pharmaceuticals Ltd)      |
| 27401 | 8886211000001101   | Diltiazem | Kenzem SR 90mg capsules (Kent Pharmaceuticals Ltd)                       |
| 27685 | 129475001000027105 | Diltiazem | Diltiazem 300mg Capsule (PLIVA Pharma Ltd)                               |
| 28949 | 228245001000027105 | Diltiazem | Bi-carzem sr 120mg Modified-release capsule (Tillomed Laboratories Ltd)  |
| 29676 | 214485001000027100 | Diltiazem | Calazem 60mg Modified-release tablet (Berk Pharmaceuticals Ltd)          |
| 30197 | 319183002          | Diltiazem | Diltiazem 120mg modified-release capsules                                |
| 30242 | 319184008          | Diltiazem | Diltiazem 180mg modified-release capsules                                |
| 31489 | 233535001000027103 | Diltiazem | Bi-carzem xl 240mg Capsule (Tillomed Laboratories Ltd)                   |
| 31676 | 70325001000027103  | Diltiazem | Diltiazem 120mg Modified-release tablet (Actavis UK Ltd)                 |
| 31737 | 655411000001104    | Diltiazem | Zildil SR 120mg capsules (Chanelle Medical UK Ltd)                       |
| 32089 | 12155001000027107  | Diltiazem | Diltiazem 120mg Modified-release capsule (Hillcross Pharmaceuticals Ltd) |
| 32262 | 12115001000027102  | Diltiazem | Diltiazem 60mg Tablet (C P Pharmaceuticals Ltd)                          |
| 32658 | 199345001000027109 | Diltiazem | Dilcardia xl 120mg Modified-release capsule (Generics (UK) Ltd)          |
| 32870 | 673611000001103    | Diltiazem | Diltiazem 60mg modified-release tablets (Sterwin Medicines)              |



|       |                    |           |                                                                                    |
|-------|--------------------|-----------|------------------------------------------------------------------------------------|
| 34377 | 95755001000027109  | Diltiazem | Diltiazem 90mg Modified-release capsule (Hillcross Pharmaceuticals Ltd)            |
| 34475 | 45985001000027103  | Diltiazem | Diltiazem 90mg Modified-release tablet (IVAX Pharmaceuticals UK Ltd)               |
| 34581 | 152545001000027104 | Diltiazem | Diltiazem 60mg Modified-release tablet (Kent Pharmaceuticals Ltd)                  |
| 34824 | 45995001000027104  | Diltiazem | Diltiazem 120mg Modified-release tablet (IVAX Pharmaceuticals UK Ltd)              |
| 35696 | 8886511000001103   | Diltiazem | Kenzem SR 120mg capsules (Kent Pharmaceuticals Ltd)                                |
| 36583 | 215645001000027101 | Diltiazem | Zemret xl 180mg Capsule (Neo Laboratories Ltd)                                     |
| 36664 | 215665001000027107 | Diltiazem | Zemret xl 300mg Capsule (Neo Laboratories Ltd)                                     |
| 37774 | 8885711000001100   | Diltiazem | Kenzem SR 60mg capsules (Kent Pharmaceuticals Ltd)                                 |
| 38066 | 89675001000027109  | Diltiazem | Diltiazem 60mg Modified-release tablet (Lagap)                                     |
| 38545 | 261611000001107    | Diltiazem | Tildiem LA 200 capsules (Sanofi)                                                   |
| 38632 | 2887011000001102   | Diltiazem | Adizem-SR 90mg capsules (Napp Pharmaceuticals Ltd)                                 |
| 38634 | 2886111000001104   | Diltiazem | Adizem-XL 300mg capsules (Napp Pharmaceuticals Ltd)                                |
| 38818 | 2887311000001104   | Diltiazem | Adizem-SR 120mg capsules (Napp Pharmaceuticals Ltd)                                |
| 38831 | 2886711000001103   | Diltiazem | Adizem-SR 180mg capsules (Napp Pharmaceuticals Ltd)                                |
| 38855 | 2938011000001101   | Diltiazem | Adizem-XL 180mg capsules (Napp Pharmaceuticals Ltd)                                |
| 38865 | 2937811000001108   | Diltiazem | Adizem-XL 120mg capsules (Napp Pharmaceuticals Ltd)                                |
| 38876 | 893111000001107    | Diltiazem | Tildiem LA 300 capsules (Sanofi)                                                   |
| 38882 | 2886311000001102   | Diltiazem | Adizem-XL 240mg capsules (Napp Pharmaceuticals Ltd)                                |
| 38964 | 2885611000001102   | Diltiazem | Adizem-SR 120mg tablets (Napp Pharmaceuticals Ltd)                                 |
| 39171 | 540011000001107    | Diltiazem | Bi-Carzem SR 60mg capsules (Tillomed Laboratories Ltd)                             |
| 39298 | 764511000001100    | Diltiazem | Bi-Carzem SR 90mg capsules (Tillomed Laboratories Ltd)                             |
| 41489 | 580711000001101    | Diltiazem | Bi-Carzem SR 120mg capsules (Tillomed Laboratories Ltd)                            |
| 41635 | 544111000001104    | Diltiazem | Diltiazem 60mg modified-release tablets (IVAX Pharmaceuticals UK Ltd)              |
| 42731 | 155325001000027102 | Diltiazem | Diltiazem sr 120mg Capsule (Hillcross Pharmaceuticals Ltd)                         |
| 42804 | 129425001000027106 | Diltiazem | Diltiazem 180mg Capsule (PLIVA Pharma Ltd)                                         |
| 42819 | 163525001000027109 | Diltiazem | Diltiazem xl 240mg Capsule (Hillcross Pharmaceuticals Ltd)                         |
| 43430 | 10065011000001102  | Diltiazem | Diltiazem 120mg modified-release tablets (A A H Pharmaceuticals Ltd)               |
| 44192 | 823511000001107    | Diltiazem | Zemret 240 XL capsules (Tillomed Laboratories Ltd)                                 |
| 44887 | 233545001000027102 | Diltiazem | Bi-carzem xl 300mg Capsule (Tillomed Laboratories Ltd)                             |
| 45759 | 129455001000027107 | Diltiazem | Diltiazem 240mg Capsule (PLIVA Pharma Ltd)                                         |
| 46937 | 896111000001102    | Diltiazem | Diltiazem 60mg modified-release tablets (Actavis UK Ltd)                           |
| 47415 | 203125001000027107 | Diltiazem | Diltiazem sr 60mg Capsule (Hillcross Pharmaceuticals Ltd)                          |
| 47530 | 591411000001102    | Diltiazem | Horizem SR 60mg capsules (Horizon lifecare)                                        |
| 47608 | 640311000001101    | Diltiazem | Zemret 300 XL capsules (Tillomed Laboratories Ltd)                                 |
| 47724 | 884811000001103    | Diltiazem | Bi-Carzem XL 240mg capsules (Tillomed Laboratories Ltd)                            |
| 47732 | 924711000001109    | Diltiazem | Zemret 180 XL capsules (Tillomed Laboratories Ltd)                                 |
| 48272 | 10054911000001105  | Diltiazem | Diltiazem 60mg modified-release capsules (Alliance Healthcare (Distribution) Ltd)  |
| 48282 | 18311411000001106  | Diltiazem | Diltiazem 90mg modified-release capsules (A A H Pharmaceuticals Ltd)               |
| 48288 | 18311611000001109  | Diltiazem | Diltiazem 120mg modified-release capsules (A A H Pharmaceuticals Ltd)              |
| 48457 | 10055111000001106  | Diltiazem | Diltiazem 90mg modified-release capsules (Alliance Healthcare (Distribution) Ltd)  |
| 48870 | 19871811000001100  | Diltiazem | Adizem-SR 90mg capsules (DE Pharmaceuticals)                                       |
| 49001 | 10055311000001108  | Diltiazem | Diltiazem 120mg modified-release tablets (Alliance Healthcare (Distribution) Ltd)  |
| 49289 | 10054711000001108  | Diltiazem | Diltiazem 120mg modified-release capsules (Alliance Healthcare (Distribution) Ltd) |

|       |                   |           |                                                                                  |
|-------|-------------------|-----------|----------------------------------------------------------------------------------|
| 49390 | 10055511000001102 | Diltiazem | Diltiazem 90mg modified-release tablets (Alliance Healthcare (Distribution) Ltd) |
| 51261 | 18481611000001101 | Diltiazem | Tildiem Retard 120mg tablets (Mawdsley-Brooks & Company Ltd)                     |
| 52276 | 19872011000001103 | Diltiazem | Adizem-XL 180mg capsules (DE Pharmaceuticals)                                    |
| 52701 | 18481911000001107 | Diltiazem | Tildiem LA 200 capsules (Mawdsley-Brooks & Company Ltd)                          |
| 54799 | 17465311000001101 | Diltiazem | Tildiem LA 300 capsules (Mawdsley-Brooks & Company Ltd)                          |
| 55257 | 8457011000001107  | Diltiazem | Diltiazem 60mg/ 5ml oral solution                                                |
| 56467 | 14005111000001104 | Diltiazem | Tildiem 60mg modified-release tablets (DE Pharmaceuticals)                       |
| 56758 | 21864611000001102 | Diltiazem | Diltiazem 90mg modified-release capsules (Cubic Pharmaceuticals Ltd)             |
| 57208 | 21864811000001103 | Diltiazem | Diltiazem 120mg modified-release capsules (Cubic Pharmaceuticals Ltd)            |
| 57594 | 5424211000001104  | Diltiazem | Tildiem 60mg modified-release tablets (Waymade Healthcare Plc)                   |
| 57859 | 21865011000001108 | Diltiazem | Diltiazem 90mg modified-release tablets (Cubic Pharmaceuticals Ltd)              |
| 59098 | 16158611000001109 | Diltiazem | Dilzem XL 180 capsules (Lexon (UK) Ltd)                                          |
| 59585 | 21965711000001100 | Diltiazem | Uard 120XL capsules (Ennogen Healthcare Ltd)                                     |
| 59863 | 16158811000001108 | Diltiazem | Dilzem XL 240 capsules (Lexon (UK) Ltd)                                          |
| 60415 | 17537211000001101 | Diltiazem | Dilzem XL 180 capsules (Sigma Pharmaceuticals Plc)                               |
| 60620 | 23929811000001107 | Diltiazem | Adizem-XL 240mg capsules (Waymade Healthcare Plc)                                |
| 61010 | 23586211000001104 | Diltiazem | Diltiazem 120mg modified-release tablets (Cubic Pharmaceuticals Ltd)             |
| 61245 | 24597111000001107 | Diltiazem | Diltiazem 60mg modified-release capsules (Sigma Pharmaceuticals Plc)             |
| 61532 | 24596711000001105 | Diltiazem | Diltiazem 120mg modified-release capsules (Sigma Pharmaceuticals Plc)            |
| 62064 | 24523511000001104 | Diltiazem | Diltiazem 120mg modified-release tablets (Mawdsley-Brooks & Company Ltd)         |
| 62065 | 24117911000001101 | Diltiazem | Diltiazem 90mg modified-release tablets (Colorama Pharmaceuticals Ltd)           |
| 62207 | 23928711000001108 | Diltiazem | Adizem-SR 120mg capsules (Waymade Healthcare Plc)                                |
| 62912 | 28405011000001105 | Diltiazem | Diltiazem 120mg modified-release capsules (AM Distributions (Yorkshire) Ltd)     |
| 65504 | 29955011000001104 | Diltiazem | Adizem-SR 180mg capsules (Lexon (UK) Ltd)                                        |
| 65602 | 23929211000001106 | Diltiazem | Adizem-XL 120mg capsules (Waymade Healthcare Plc)                                |
| 65636 | 29955211000001109 | Diltiazem | Adizem-XL 120mg capsules (Lexon (UK) Ltd)                                        |
| 66048 | 14005611000001107 | Diltiazem | Tildiem Retard 120mg tablets (DE Pharmaceuticals)                                |
| 66172 | 21965911000001103 | Diltiazem | Uard 180XL capsules (Ennogen Healthcare Ltd)                                     |
| 66635 | 18574511000001102 | Diltiazem | Dilzem XL 180 capsules (DE Pharmaceuticals)                                      |
| 66701 | 24101311000001106 | Diltiazem | Diltiazem 240mg modified-release capsules (DE Pharmaceuticals)                   |
| 66834 | 21966111000001107 | Diltiazem | Uard 240XL capsules (Ennogen Healthcare Ltd)                                     |
| 66850 | 25711011000001108 | Diltiazem | Diltiazem 240mg modified-release capsules (Icarus Pharmaceuticals Ltd)           |
| 67317 | 18189911000001107 | Diltiazem | Dilzem XL 120 capsules (Mawdsley-Brooks & Company Ltd)                           |
| 67344 | 24343511000001100 | Diltiazem | Diltiazem 300mg modified-release capsules (Ennogen Pharma Ltd)                   |
| 67890 | 21965511000001105 | Diltiazem | Uard 300XL capsules (Ennogen Healthcare Ltd)                                     |
| 68054 | 526711000001105   | Diltiazem | Diltiazem 60mg modified-release tablets (Alliance Healthcare (Distribution) Ltd) |
| 68429 | 24615311000001106 | Diltiazem | Diltiazem 120mg modified-release capsules (Ethigen Ltd)                          |
| 69028 | 23969211000001102 | Diltiazem | Diltiazem 60mg modified-release capsules (DE Pharmaceuticals)                    |
| 69108 | 29956011000001108 | Diltiazem | Adizem-XL 300mg capsules (Lexon (UK) Ltd)                                        |
| 69116 | 30139111000001101 | Diltiazem | Diltiazem 60mg modified-release tablets (DE Pharmaceuticals)                     |
| 69277 | 29955811000001105 | Diltiazem | Adizem-XL 240mg capsules (Lexon (UK) Ltd)                                        |
| 70306 | 24524011000001109 | Diltiazem | Diltiazem 180mg modified-release capsules (Mawdsley-Brooks & Company Ltd)        |
| 70961 | 14005411000001109 | Diltiazem | Tildiem Retard 90mg tablets (DE Pharmaceuticals)                                 |

|       |                    |            |                                                                       |
|-------|--------------------|------------|-----------------------------------------------------------------------|
| 71342 | 10530911000001104  | Diltiazem  | Dilzem XL 240 capsules (Waymade Healthcare Plc)                       |
| 71413 | 4773111000001108   | Diltiazem  | Diltiazem 120mg modified-release capsules (A A H Pharmaceuticals Ltd) |
| 71702 | 8443011000001104   | Diltiazem  | Diltiazem 60mg/ 5ml oral solution (Special Order)                     |
| 71969 | 24597911000001105  | Diltiazem  | Diltiazem 300mg modified-release capsules (Sigma Pharmaceuticals Plc) |
| 72091 | 24102211000001105  | Diltiazem  | Diltiazem 180mg modified-release capsules (DE Pharmaceuticals)        |
| 72488 | 33424611000001105  | Diltiazem  | Diltiazem 300mg modified-release capsules (A A H Pharmaceuticals Ltd) |
| 72839 | 24410111000001104  | Diltiazem  | Diltiazem 300mg modified-release capsules (DE Pharmaceuticals)        |
| 74022 | 5426711000001102   | Diltiazem  | Tildiem LA 200 capsules (Waymade Healthcare Plc)                      |
| 74029 | 5619211000001106   | Diltiazem  | Tildiem Retard 90mg tablets (Dowelhurst Ltd)                          |
| 74053 | 17537411000001102  | Diltiazem  | Dilzem XL 240 capsules (Sigma Pharmaceuticals Plc)                    |
| 74689 | 24342811000001105  | Diltiazem  | Diltiazem 240mg modified-release capsules (Ennogen Pharma Ltd)        |
| 74915 | 22409111000001104  | Diltiazem  | Diltiazem 120mg modified-release capsules (DE Pharmaceuticals)        |
| 77077 |                    | Diltiazem  | Diltiazem 10mg/ 5ml oral solution                                     |
| 77442 |                    | Diltiazem  | Tildiem 60mg modified-release tablets (Dowelhurst Ltd)                |
| 77947 |                    | Diltiazem  | Diltiazem 120mg/ 5ml oral solution                                    |
| 29    | 182975001000027106 | Amlodipine | Amlodipine besilate 5mg tablets                                       |
| 71    | 182985001000027101 | Amlodipine | Amlodipine besilate 10mg tablets                                      |
| 729   | 237575001000027105 | Amlodipine | Amlodipine maleate 5mg tablets                                        |
| 749   | 319283006          | Amlodipine | Amlodipine 5mg tablets                                                |
| 3917  | 172711000001100    | Amlodipine | Istin 5mg tablets (Pfizer Ltd)                                        |
| 5914  | 408111000001107    | Amlodipine | Istin 10mg tablets (Pfizer Ltd)                                       |
| 6477  | 237585001000027100 | Amlodipine | Amlodipine maleate 10mg tablets                                       |
| 6856  | 319284000          | Amlodipine | Amlodipine 10mg tablets                                               |
| 16162 | 8278311000001107   | Amlodipine | Amlodipine 5mg/ 5ml oral suspension                                   |
| 17640 | 8046211000001107   | Amlodipine | Amlostin 5mg tablets (Discovery Pharmaceuticals)                      |
| 31761 | 8046411000001106   | Amlodipine | Amlostin 10mg tablets (Discovery Pharmaceuticals)                     |
| 32595 | 7305311000001108   | Amlodipine | Amlodipine 5mg tablets (A A H Pharmaceuticals Ltd)                    |
| 32917 | 7305711000001107   | Amlodipine | Amlodipine 5mg tablets (IVAX Pharmaceuticals UK Ltd)                  |
| 34093 | 7305011000001105   | Amlodipine | Amlodipine 10mg tablets (A A H Pharmaceuticals Ltd)                   |
| 36202 | 8038411000001106   | Amlodipine | Amlodipine 10mg tablets (Actavis UK Ltd)                              |
| 39804 | 11008811000001105  | Amlodipine | Amlodipine 5mg tablets (Dr Reddy's Laboratories (UK) Ltd)             |
| 39914 | 7333311000001100   | Amlodipine | Amlodipine 5mg tablets (Teva UK Ltd)                                  |
| 42210 | 9557311000001100   | Amlodipine | Amlodipine 10mg tablets (Zentiva)                                     |
| 43470 | 14768911000001108  | Amlodipine | Amlodipine 5mg tablets (Wockhardt UK Ltd)                             |
| 43880 | 11398511000001109  | Amlodipine | Amlodipine 5mg tablets (Almus Pharmaceuticals Ltd)                    |
| 45070 | 8278111000001105   | Amlodipine | Amlodipine 10mg/ 5ml oral suspension                                  |
| 45279 | 7376311000001107   | Amlodipine | Amlodipine 5mg tablets (Sandoz Ltd)                                   |
| 46233 | 243185001000027100 | Amlodipine | Amlodipine Oral solution                                              |
| 46724 | 13892511000001100  | Amlodipine | Amlodipine 5mg/ 5ml oral solution                                     |
| 47002 | 266105001000027102 | Amlodipine | Amlodipine 10mg/ 5ml sugar free Oral suspension                       |
| 49636 | 19704911000001101  | Amlodipine | Amlodipine 10mg tablets (DE Pharmaceuticals)                          |
| 52440 | 20478011000001105  | Amlodipine | Amlodipine 10mg/ 5ml oral solution                                    |
| 53868 | 8038211000001107   | Amlodipine | Amlodipine 5mg tablets (Actavis UK Ltd)                               |

|       |                   |            |                                                                                        |
|-------|-------------------|------------|----------------------------------------------------------------------------------------|
| 54515 | 7304811000001100  | Amlodipine | Amlodipine 10mg tablets (Alliance Healthcare (Distribution) Ltd)                       |
| 54633 | 15981411000001105 | Amlodipine | Amlodipine 5mg tablets (Bristol Laboratories Ltd)                                      |
| 54654 | 11399011000001106 | Amlodipine | Amlodipine 10mg tablets (Almus Pharmaceuticals Ltd)                                    |
| 54696 | 7376511000001101  | Amlodipine | Amlodipine 10mg tablets (Sandoz Ltd)                                                   |
| 54983 | 8278211000001104  | Amlodipine | Amlodipine 2.5mg/ 5ml oral suspension                                                  |
| 56147 | 18457811000001100 | Amlodipine | Amlodipine 10mg tablets (Accord Healthcare Ltd)                                        |
| 56334 | 15981211000001106 | Amlodipine | Amlodipine 10mg tablets (Bristol Laboratories Ltd)                                     |
| 58580 | 19833311000001108 | Amlodipine | Amlodipine 10mg tablets (APC Pharmaceuticals & Chemicals (Europe) Ltd)                 |
| 59001 | 7391311000001109  | Amlodipine | Amlodipine 10mg tablets (Mylan)                                                        |
| 59762 | 7333511000001106  | Amlodipine | Amlodipine 10mg tablets (Teva UK Ltd)                                                  |
| 60244 | 17779511000001109 | Amlodipine | Amlodipine 10mg tablets (Phoenix Healthcare Distribution Ltd)                          |
| 61374 | 11712011000001102 | Amlodipine | Amlodipine 4mg/ 5ml oral suspension                                                    |
| 61422 | 18458011000001107 | Amlodipine | Amlodipine 5mg tablets (Accord Healthcare Ltd)                                         |
| 63515 | 11009211000001104 | Amlodipine | Amlodipine 10mg tablets (Dr Reddy's Laboratories (UK) Ltd)                             |
| 64166 | 29826311000001101 | Amlodipine | Amlodipine 5mg/ 5ml oral solution sugar free                                           |
| 64327 | 7391211000001101  | Amlodipine | Amlodipine 5mg tablets (Mylan)                                                         |
| 64418 | 22080611000001107 | Amlodipine | Amlodipine 5mg tablets (Waymade Healthcare Plc)                                        |
| 64441 | 7304611000001104  | Amlodipine | Amlodipine 5mg tablets (Alliance Healthcare (Distribution) Ltd)                        |
| 64447 | 19164711000001109 | Amlodipine | Amlodipine 5mg tablets (Somex Pharma)                                                  |
| 64606 | 10287111000001103 | Amlodipine | Amlodipine 5mg tablets (Focus Pharmaceuticals Ltd)                                     |
| 64623 | 29826211000001109 | Amlodipine | Amlodipine 10mg/ 5ml oral solution sugar free                                          |
| 65745 | 19705311000001103 | Amlodipine | Amlodipine 5mg tablets (DE Pharmaceuticals)                                            |
| 66430 | 7378711000001105  | Amlodipine | Amlodipine 5mg tablets (Kent Pharmaceuticals Ltd)                                      |
| 66574 | 17779111000001100 | Amlodipine | Amlodipine 5mg tablets (Phoenix Healthcare Distribution Ltd)                           |
| 66817 | 14769111000001103 | Amlodipine | Amlodipine 10mg tablets (Wockhardt UK Ltd)                                             |
| 67662 | 13917011000001100 | Amlodipine | Istin 10mg tablets (DE Pharmaceuticals)                                                |
| 68221 | 7378911000001107  | Amlodipine | Amlodipine 10mg tablets (Kent Pharmaceuticals Ltd)                                     |
| 68311 | 29932511000001100 | Amlodipine | Amlodipine 5mg/ 5ml oral solution sugar free (A A H Pharmaceuticals Ltd)               |
| 70999 | 19833111000001106 | Amlodipine | Amlodipine 5mg tablets (APC Pharmaceuticals & Chemicals (Europe) Ltd)                  |
| 71344 | 5332311000001106  | Amlodipine | Amlodipine 5mg tablets (Waymade Healthcare Plc)                                        |
| 71353 | 5450111000001102  | Amlodipine | Amlodipine 5mg tablets (Dowelhurst Ltd)                                                |
| 71939 | 10286711000001100 | Amlodipine | Amlodipine 10mg tablets (Focus Pharmaceuticals Ltd)                                    |
| 72049 | 29992111000001103 | Amlodipine | Amlodipine 5mg tablets (Mawdsley-Brooks & Company Ltd)                                 |
| 72199 | 35134611000001100 | Amlodipine | Amlodipine 5mg tablets (Aurobindo Pharma Ltd)                                          |
| 72430 | 29781411000001107 | Amlodipine | Amlodipine 10mg/ 5ml oral solution sugar free (Alliance Healthcare (Distribution) Ltd) |
| 73612 | 30821811000001103 | Amlodipine | Amlodipine 5mg/ 5ml oral solution sugar free (DE Pharmaceuticals)                      |
| 74108 | 15064611000001101 | Amlodipine | Amlodipine 5mg tablets (Sigma Pharmaceuticals Plc)                                     |
| 74121 | 30216911000001104 | Amlodipine | Amlodipine 5mg/ 5ml oral solution sugar free (Thame Laboratories Ltd)                  |
| 74795 | 19164911000001106 | Amlodipine | Amlodipine 10mg tablets (Somex Pharma)                                                 |
| 74820 | 15064211000001103 | Amlodipine | Amlodipine 10mg tablets (Sigma Pharmaceuticals Plc)                                    |
| 74821 | 13764411000001106 | Amlodipine | Amlodipine 5mg tablets (Apotex UK Ltd)                                                 |
| 75387 | 10378211000001106 | Amlodipine | Amlodipine 5mg tablets (Arrow Generics Ltd)                                            |
| 75609 |                   | Amlodipine | Amlodipine 5mg/ 5ml oral solution (Special Order)                                      |

|                  |                    |                                  |                                                                        |
|------------------|--------------------|----------------------------------|------------------------------------------------------------------------|
| 75862            |                    | Amlodipine                       | Amlodipine 5mg/ 5ml oral suspension sugar free                         |
| 76714            |                    | Amlodipine                       | Amlodipine 10mg/ 5ml oral solution sugar free (Thame Laboratories Ltd) |
| 77416            |                    | Amlodipine                       | Istin 10mg tablets (Dowelhurst Ltd)                                    |
| 77420            |                    | Amlodipine                       | Istin 5mg tablets (DE Pharmaceuticals)                                 |
| 77446            |                    | Amlodipine                       | Istin 10mg tablets (Waymade Healthcare Plc)                            |
| 7823             | 188995001000027108 |                                  | NIFEDIPINE TAB 5 mg                                                    |
| 8024             | 96995001000027108  |                                  | DILTIAZEM XL 300 MG CAP                                                |
| 9094             | 118925001000027105 |                                  | DILTIAZEM SR 300 MG CAP                                                |
| 9211             | 95195001000027109  |                                  | ADIZEM-XL 180 MG CAP                                                   |
| 10897            | 96235001000027102  |                                  | VERAPAMIL S/ F 40 MG/ 5ML SOL                                          |
| 15659            | 151485001000027101 |                                  | DILTIAZEM S/ R 180 CAP                                                 |
| 18631            |                    |                                  | VERAPAMIL MR                                                           |
| 18690            | 133445001000027107 |                                  | SECURON (CALENDAR PACK) 120 MG TAB                                     |
| 19015            | 171845001000027100 |                                  | ADIZEM CONTINUS 120 MG TAB                                             |
| 21496            | 166105001000027100 |                                  | PERHEXILINE MALEATE 100 MG TAB                                         |
| 21665            |                    |                                  | CORDILOX                                                               |
| 23458            |                    |                                  | VERAPAMIL SR                                                           |
| 23730            | 163275001000027103 |                                  | VERAPAMIL 100 MG TAB                                                   |
| 25026            |                    |                                  | NIFEDIPINE RETARD                                                      |
| 25027            |                    |                                  | ADALAT RETARD 10                                                       |
| 25044            |                    |                                  | NIFEDIPINE RETARD                                                      |
| 25055            |                    |                                  | NIFEDIPINE                                                             |
| 27910            |                    |                                  | ADALAT 5                                                               |
| 30491            |                    |                                  | DILTIAZEM                                                              |
| 36684            | 193285001000027105 |                                  | SLOFEDIPINE 20 MG TAB                                                  |
| <b>Diuretics</b> |                    |                                  |                                                                        |
| 4044             | 348911000001105    | Xipamide                         | Diurexan 20mg tablets (Meda Pharmaceuticals Ltd)                       |
| 7618             | 317970008          | Xipamide                         | Xipamide 20mg tablets                                                  |
| 9223             | 145145001000027101 | Triamterene/ Hydrochlorothiazide | Triamterene with hydrochlorothiazide 50mg + 25mg Tablet                |
| 15127            | 116085001000027104 | Triamterene/ Hydrochlorothiazide | Hydrochlorothiazide with triamterene 25mgwith50mg Tablet               |
| 2961             | 25411000001108     | Triamterene/ Furosemide          | Frusene 50mg/ 40mg tablets (Orion Pharma (UK) Ltd)                     |
| 3050             | 107985001000027109 | Triamterene/ Furosemide          | Furosemide with triamterene 40mgwith50mg Tablet                        |
| 11265            | 318101005          | Triamterene/ Furosemide          | Triamterene 50mg / Furosemide 40mg tablets                             |
| 28157            | 40985001000027105  | Triamterene/ Chlortalidone       | Kalspare Is Tablet (Dominion Pharma)                                   |
| 37294            | 145265001000027105 | Triamterene/ Chlortalidone       | Triamterene with chlortalidone 50mg + 25mg Tablet                      |
| 7136             | 714911000001108    | Triamterene/ Benzthiazide        | Dytide capsules (Mercury Pharma Group Ltd)                             |
| 7740             | 318098006          | Triamterene/ Benzthiazide        | Triamterene 50mg / Benzthiazide 25mg capsules                          |
| 2179             | 318082004          | Triamterene                      | Triamterene 50mg capsules                                              |
| 4068             | 3907911000001100   | Triamterene                      | Dytac 50mg capsules (AMCo)                                             |
| 8052             | 318041004          | Torasemide                       | Torasemide 5mg tablets                                                 |
| 10066            | 3700311000001109   | Torasemide                       | Torem 5mg tablets (Meda Pharmaceuticals Ltd)                           |
| 11268            | 3699711000001107   | Torasemide                       | Torem 2.5mg tablets (Meda Pharmaceuticals Ltd)                         |
| 11487            | 318040003          | Torasemide                       | Torasemide 2.5mg tablets                                               |

|       |                    |                                    |                                                                       |
|-------|--------------------|------------------------------------|-----------------------------------------------------------------------|
| 18096 | 318042006          | Toraseamide                        | Toraseamide 10mg tablets                                              |
| 22658 | 3700811000001100   | Toraseamide                        | Torem 10mg tablets (Meda Pharmaceuticals Ltd)                         |
| 40190 | 198075001000027106 | Toraseamide                        | Toraseamide iv 20mg/ 4ml Intravenous injection                        |
| 40738 | 198025001000027107 | Toraseamide                        | Torem iv 10mg/ 2ml Intravenous injection (Boehringer Mannheim UK Ltd) |
| 40898 | 5889911000001108   | Toraseamide                        | Toraseamide 5mg tablets (A A H Pharmaceuticals Ltd)                   |
| 46525 | 5592211000001107   | Toraseamide                        | Toraseamide 5mg tablets (Teva UK Ltd)                                 |
| 1297  | 4669111000001107   | Spironolactone/ Hydroflumethiazide | Aldactide 50 tablets (Pfizer Ltd)                                     |
| 2001  | 762511000001105    | Spironolactone/ Hydroflumethiazide | Aldactide 25 tablets (Pfizer Ltd)                                     |
| 7961  | 141515001000027104 | Spironolactone/ Hydroflumethiazide | Spironolactone 50mg with hydroflumethiazide 50mg tablet               |
| 8521  | 141505001000027101 | Spironolactone/ Hydroflumethiazide | Spironolactone 25mg with hydroflumethiazide 25mg tablet               |
| 11384 | 318128000          | Spironolactone/ Hydroflumethiazide | Co-flumactone 50mg/ 50mg tablets                                      |
| 15811 | 318127005          | Spironolactone/ Hydroflumethiazide | Co-flumactone 25mg/ 25mg tablets                                      |
| 25505 | 196775001000027101 | Spironolactone/ Hydroflumethiazide | Spiro-co 50mg+50mg Tablet (IVAX Pharmaceuticals UK Ltd)               |
| 29529 | 116225001000027101 | Spironolactone/ Hydroflumethiazide | Hydroflumethiazide with spironolactone 25mg+25mg Tablet               |
| 31131 | 196765001000027108 | Spironolactone/ Hydroflumethiazide | Spiro-co 25mg+25mg Tablet (IVAX Pharmaceuticals UK Ltd)               |
| 45916 | 116235001000027104 | Spironolactone/ Hydroflumethiazide | Hydroflumethiazide with spironolactone 50mg+50mg Tablet               |
| 4661  | 318102003          | Spironolactone/ Furosemide         | Spironolactone 50mg / Furosemide 20mg capsules                        |
| 7441  | 3645811000001107   | Spironolactone/ Furosemide         | Lasilactone 20mg/ 50mg capsules (Sanofi)                              |
| 53508 | 12424811000001104  | Spironolactone/ Chlorothiazide     | Spironolactone 5mg/ 5ml / Chlorothiazide 50mg/ 5ml oral suspension    |
| 692   | 318056008          | Spironolactone                     | Spironolactone 25mg tablets                                           |
| 708   | 318057004          | Spironolactone                     | Spironolactone 50mg tablets                                           |
| 787   | 141475001000027103 | Spironolactone                     | Spironolactone 100mg capsule                                          |
| 2142  | 318058009          | Spironolactone                     | Spironolactone 100mg tablets                                          |
| 2389  | 930511000001105    | Spironolactone                     | Aldactone 25mg tablets (Pfizer Ltd)                                   |
| 4161  | 84985001000027102  | Spironolactone                     | Spiroctan 25mg Tablet (Roche Products Ltd)                            |
| 4960  | 921811000001103    | Spironolactone                     | Aldactone 50mg tablets (Pfizer Ltd)                                   |
| 6815  | 196545001000027101 | Spironolactone                     | Spironolactone 50mg/ 5ml oral suspension sugar free                   |
| 7952  | 421611000001100    | Spironolactone                     | Aldactone 100mg tablets (Pfizer Ltd)                                  |
| 7991  | 85005001000027103  | Spironolactone                     | Spiroctan 100mg Capsule (Roche Products Ltd)                          |
| 10214 | 196365001000027109 | Spironolactone                     | Spironolactone 5mg/ 5ml oral suspension sugar free                    |
| 11156 | 40795001000027101  | Spironolactone                     | Spirolone 25mg Tablet (Berk Pharmaceuticals Ltd)                      |
| 11519 | 196385001000027107 | Spironolactone                     | Spironolactone 25mg/ 5ml oral suspension sugar free                   |
| 12946 | 196375001000027102 | Spironolactone                     | Spironolactone 10mg/ 5ml oral suspension sugar free                   |
| 13264 | 8727011000001103   | Spironolactone                     | Spironolactone 15mg/ 5ml oral suspension                              |
| 14109 | 196555001000027103 | Spironolactone                     | Spironolactone 100mg/ 5ml oral solution sugar free                    |
| 15052 | 84995001000027103  | Spironolactone                     | Spiroctan 50mg Tablet (Roche Products Ltd)                            |
| 17902 | 40815001000027104  | Spironolactone                     | Spirolone 100mg Tablet (Berk Pharmaceuticals Ltd)                     |
| 17950 | 40805001000027101  | Spironolactone                     | Spirolone 50mg Tablet (Berk Pharmaceuticals Ltd)                      |
| 19195 | 60755001000027100  | Spironolactone                     | Spironolactone 50mg Tablet (Wyeth Pharmaceuticals)                    |
| 21911 | 155055001000027102 | Spironolactone                     | Spirospare 25mg Tablet (Ashbourne Pharmaceuticals Ltd)                |
| 23091 | 3411000001104      | Spironolactone                     | Spirospare 100 tablets (Ashbourne Pharmaceuticals Ltd)                |
| 25494 | 75095001000027104  | Spironolactone                     | Diatensec 50mg Tablet (Pharmacia Ltd)                                 |
| 29397 | 87695001000027105  | Spironolactone                     | Spiretic 100mg Tablet (DDSA Pharmaceuticals Ltd)                      |

|       |                   |                |                                                                                    |
|-------|-------------------|----------------|------------------------------------------------------------------------------------|
| 31219 | 670811000001106   | Spironolactone | Spironolactone 100mg tablets (A A H Pharmaceuticals Ltd)                           |
| 31529 | 82311000001101    | Spironolactone | Spironolactone 25mg tablets (Teva UK Ltd)                                          |
| 32837 | 330511000001102   | Spironolactone | Spironolactone 50mg tablets (Teva UK Ltd)                                          |
| 34296 | 63111000001106    | Spironolactone | Spironolactone 25mg tablets (A A H Pharmaceuticals Ltd)                            |
| 34347 | 672411000001105   | Spironolactone | Spironolactone 25mg tablets (Actavis UK Ltd)                                       |
| 34908 | 474611000001102   | Spironolactone | Spironolactone 25mg tablets (IVAX Pharmaceuticals UK Ltd)                          |
| 35789 | 20575001000027108 | Spironolactone | Spironolactone 25mg Tablet (Celltech Pharma Europe Ltd)                            |
| 41074 | 9803611000001107  | Spironolactone | Spironolactone 25mg tablets (Almus Pharmaceuticals Ltd)                            |
| 41592 | 38611000001103    | Spironolactone | Spironolactone 100mg tablets (Actavis UK Ltd)                                      |
| 41660 | 610611000001103   | Spironolactone | Spironolactone 100mg tablets (Teva UK Ltd)                                         |
| 41706 | 121211000001101   | Spironolactone | Spironolactone 50mg tablets (IVAX Pharmaceuticals UK Ltd)                          |
| 43514 | 481811000001107   | Spironolactone | Spironolactone 50mg tablets (A A H Pharmaceuticals Ltd)                            |
| 45078 | 60285001000027101 | Spironolactone | Spironolactone 25mg/ 5ml Oral solution sugar free (Rosemont Pharmaceuticals Ltd)   |
| 46674 | 60315001000027106 | Spironolactone | Spironolactone 50mg/ 5ml Oral suspension sugar free (Rosemont Pharmaceuticals Ltd) |
| 46990 | 8726411000001105  | Spironolactone | Spironolactone 50mg/ 5ml oral suspension                                           |
| 47018 | 8726511000001109  | Spironolactone | Spironolactone 25mg/ 5ml oral suspension                                           |
| 47687 | 87685001000027106 | Spironolactone | Spirotic 25mg Tablet (DDSA Pharmaceuticals Ltd)                                    |
| 49388 | 8727611000001105  | Spironolactone | Spironolactone 100mg/ 5ml oral suspension                                          |
| 50079 | 8727311000001100  | Spironolactone | Spironolactone 10mg/ 5ml oral suspension                                           |
| 50370 | 8726311000001103  | Spironolactone | Spironolactone 5mg/ 5ml oral suspension                                            |
| 51652 | 13583411000001106 | Spironolactone | Spironolactone 25mg tablets (DE Pharmaceuticals)                                   |
| 51720 | 13894811000001108 | Spironolactone | Spironolactone 25mg/ 5ml oral solution                                             |
| 51933 | 13894911000001103 | Spironolactone | Spironolactone 50mg/ 5ml oral solution                                             |
| 52366 | 13895011000001103 | Spironolactone | Spironolactone 5mg/ 5ml oral solution                                              |
| 52970 | 13894711000001100 | Spironolactone | Spironolactone 10mg/ 5ml oral solution                                             |
| 53253 | 8705811000001105  | Spironolactone | Spironolactone 50mg/ 5ml oral suspension (Drug Tariff Special Order)               |
| 54120 | 13374211000001104 | Spironolactone | Spironolactone 4mg/ 5ml oral suspension                                            |
| 56067 | 13374111000001105 | Spironolactone | Spironolactone 4mg/ 5ml oral solution                                              |
| 56274 | 13355011000001105 | Spironolactone | Spironolactone 4.5mg/ 5ml oral suspension                                          |
| 56536 | 13894611000001109 | Spironolactone | Spironolactone 100mg/ 5ml oral solution                                            |
| 57104 | 13326311000001102 | Spironolactone | Spironolactone 200mg/ 5ml oral suspension                                          |
| 57556 | 13325611000001102 | Spironolactone | Spironolactone 12mg/ 5ml oral solution                                             |
| 57933 | 13374011000001109 | Spironolactone | Spironolactone 40mg/ 5ml oral suspension                                           |
| 58077 | 13385811000001105 | Spironolactone | Spironolactone 8mg/ 5ml oral suspension                                            |
| 58225 | 13326111000001104 | Spironolactone | Spironolactone 2.5mg/ 5ml oral suspension                                          |
| 58757 | 13326511000001108 | Spironolactone | Spironolactone 20mg/ 5ml oral suspension                                           |
| 60343 | 235211000001102   | Spironolactone | Spironolactone 25mg tablets (Kent Pharmaceuticals Ltd)                             |
| 60660 | 13354811000001100 | Spironolactone | Spironolactone 3mg/ 5ml oral suspension                                            |
| 61025 | 13326411000001109 | Spironolactone | Spironolactone 20mg/ 5ml oral solution                                             |
| 63309 | 13384811000001109 | Spironolactone | Spironolactone 6mg/ 5ml oral suspension                                            |
| 65582 | 13354711000001108 | Spironolactone | Spironolactone 3mg/ 5ml oral solution                                              |
| 65822 | 13325311000001107 | Spironolactone | Spironolactone 12.5mg/ 5ml oral suspension                                         |
| 67913 | 606411000001101   | Spironolactone | Spironolactone 50mg tablets (Kent Pharmaceuticals Ltd)                             |

|       |                    |                                   |                                                                                                 |
|-------|--------------------|-----------------------------------|-------------------------------------------------------------------------------------------------|
| 69473 | 13354211000001101  | Spironolactone                    | Spironolactone 3.5mg/ 5ml oral suspension                                                       |
| 71010 | 20326811000001106  | Spironolactone                    | Spironolactone 25mg tablets (Genesis Pharmaceuticals Ltd)                                       |
| 71398 | 13325211000001104  | Spironolactone                    | Spironolactone 12.5mg/ 5ml oral solution                                                        |
| 73208 | 13385411000001108  | Spironolactone                    | Spironolactone 7mg/ 5ml oral suspension                                                         |
| 73644 | 11010911000001104  | Spironolactone                    | Spironolactone 25mg tablets (Dr Reddy's Laboratories (UK) Ltd)                                  |
| 74154 | 13353811000001103  | Spironolactone                    | Spironolactone 2mg/ 5ml oral suspension                                                         |
| 74285 | 8707011000001106   | Spironolactone                    | Spironolactone 25mg/ 5ml oral suspension (Drug Tariff Special Order)                            |
| 74631 | 46011000001105     | Spironolactone                    | Spironolactone 50mg tablets (Actavis UK Ltd)                                                    |
| 75413 |                    | Spironolactone                    | Spironolactone 8mg/ 5ml oral solution (Special Order)                                           |
| 75488 |                    | Spironolactone                    | Spironolactone 250mg/ 5ml oral suspension                                                       |
| 75593 |                    | Spironolactone                    | Spironolactone 10mg/ 5ml Oral solution sugar free (Rosemont Pharmaceuticals Ltd)                |
| 76195 |                    | Spironolactone                    | Spironolactone 5mg/ 5ml Oral suspension sugar free (Rosemont Pharmaceuticals Ltd)               |
| 76321 |                    | Spironolactone                    | Spironolactone 100mg tablets (Genesis Pharmaceuticals Ltd)                                      |
| 77604 |                    | Spironolactone                    | Spironolactone 7.5mg/ 5ml oral suspension                                                       |
| 77610 |                    | Spironolactone                    | Spironolactone 6.25mg/ 5ml oral suspension                                                      |
| 7582  | 3704811000001105   | Potassium chloride/ Furosemide    | Lasikal modified-release tablets (Borg Medicare)                                                |
| 7734  | 4540011000001102   | Potassium chloride/ Furosemide    | Diumide-K Continus tablets (Teofarma)                                                           |
| 8102  | 4557711000001102   | Potassium chloride/ Furosemide    | Furosemide 40mg / Potassium chloride 600mg (potassium 8mmol) modified-release tablets           |
| 10781 | 37075001000027100  | Potassium chloride/ Furosemide    | Lasix with k Tablet (Hoechst Marion Roussel)                                                    |
| 17960 | 36061311000001109  | Potassium chloride/ Furosemide    | Furosemide 20mg / Potassium chloride 750mg (potassium 10mmol) modified-release tablets          |
| 18983 | 3875001000027105   | Potassium Chloride/ Clopamide     | Brinaldix k Effervescent tablet (Berk Pharmaceuticals Ltd)                                      |
| 22839 | 209335001000027100 | Potassium Chloride/ Clopamide     | Clopamide with Potassium effervescent tablets                                                   |
| 8891  | 14465001000027109  | Potassium Chloride/ Chlortalidone | Hygroton -k Tablet (Novartis Pharmaceuticals UK Ltd)                                            |
| 1776  | 3290211000001109   | Potassium chloride/ Bumetanide    | Burinex K modified-release tablets (LEO Pharma)                                                 |
| 6160  | 35913011000001100  | Potassium chloride/ Bumetanide    | Bumetanide 500microgram / Potassium chloride 573mg (potassium 7.7mmol) modified-release tablets |
| 12360 | 20915001000027105  | Polythiazide                      | "Nephriil 1mg Tablet (Pfizer Ltd)"                                                              |
| 12926 | 317967009          | Polythiazide                      | "Polythiazide 1mg tablets"                                                                      |
| 7709  | 39735001000027105  | Piretanide                        | Arelix 6mg Capsule (Hoechst Marion Roussel)                                                     |
| 12367 | 135585001000027102 | Piretanide                        | Piretanide 6mg capsule                                                                          |
| 4332  | 317965001          | Metolazone                        | Metolazone 5mg tablets                                                                          |
| 4334  | 115735001000027107 | Metolazone                        | Metolazone 500microgram low dose Tablet                                                         |
| 8602  | 375611000001109    | Metolazone                        | Metenix 5mg tablets (Sanofi)                                                                    |
| 19352 | 176195001000027101 | Metolazone                        | Xuret 0.5mg Tablet (Galen Ltd)                                                                  |
| 49752 | 13005911000001103  | Metolazone                        | Metolazone 2.5mg/ 5ml oral solution                                                             |
| 53674 | 374173002          | Metolazone                        | Metolazone 2.5mg tablets                                                                        |
| 54329 | 13006411000001102  | Metolazone                        | Metolazone 5mg/ 5ml oral suspension                                                             |
| 54643 | 251255001000027106 | Metolazone                        | Metolazone Oral solution                                                                        |
| 55777 | 13006311000001109  | Metolazone                        | Metolazone 5mg/ 5ml oral solution                                                               |
| 61846 | 503445001000027107 | Metolazone                        | Zaroxolyn 2.5mg tablets (IDIS)                                                                  |
| 68432 | 13006011000001106  | Metolazone                        | Metolazone 2.5mg/ 5ml oral suspension                                                           |



|       |                    |                        |                                                                       |
|-------|--------------------|------------------------|-----------------------------------------------------------------------|
| 69009 | 21574611000001109  | Metolazone             | Zaroxolyn 5mg tablets (Imported (Canada))                             |
| 75260 | 21574911000001103  | Metolazone             | Zaroxolyn 2.5mg tablets (Imported (Canada))                           |
| 18267 | 124815001000027107 | Methyclothiazide       | "Enduron 5mg Tablet (Abbott Laboratories Ltd)"                        |
| 20057 | 124785001000027106 | Methyclothiazide       | "Methyclothiazide 5mg Tablet"                                         |
| 31013 | 124005001000027109 | Mersalyl               | Mersalyl 50mg/ ml Injection                                           |
| 15457 | 2515001000027106   | Mefruside              | Baycaron 25mg Tablet (Bayer Plc)                                      |
| 17143 | 123565001000027105 | Mefruside              | Mefruside 25mg Tablet                                                 |
| 2612  | 317956008          | Indapamide hemihydrate | Indapamide 2.5mg tablets                                              |
| 7641  | 321811000001109    | Indapamide hemihydrate | Natrilix 2.5mg tablets (Servier Laboratories Ltd)                     |
| 26256 | 209045001000027100 | Indapamide hemihydrate | Opumide 2.5mg Tablet (Opus Pharmaceuticals Ltd)                       |
| 26275 | 424311000001108    | Indapamide hemihydrate | Nindaxa 2.5 tablets (Ashbourne Pharmaceuticals Ltd)                   |
| 27957 | 207505001000027101 | Indapamide hemihydrate | Natramid 2.5mg Tablet (Trinity Pharmaceuticals Ltd)                   |
| 33083 | 711711000001108    | Indapamide hemihydrate | Indapamide 2.5mg tablets (Teva UK Ltd)                                |
| 34551 | 450511000001107    | Indapamide hemihydrate | Indapamide 2.5mg tablets (Mylan)                                      |
| 40907 | 8139411000001107   | Indapamide hemihydrate | Indapamide 2.5mg tablets (Genus Pharmaceuticals Ltd)                  |
| 42906 | 10437611000001100  | Indapamide hemihydrate | Indapamide 2.5mg tablets (Niche Generics Ltd)                         |
| 43516 | 397311000001100    | Indapamide hemihydrate | Indapamide 2.5mg tablets (Actavis UK Ltd)                             |
| 48079 | 214811000001107    | Indapamide hemihydrate | Indapamide 2.5mg tablets (Zentiva)                                    |
| 48099 | 56211000001102     | Indapamide hemihydrate | Indapamide 2.5mg tablets (A A H Pharmaceuticals Ltd)                  |
| 49529 | 17932311000001102  | Indapamide hemihydrate | Indapamide 2.5mg tablets (Phoenix Healthcare Distribution Ltd)        |
| 54316 | 598411000001109    | Indapamide hemihydrate | Indapamide 2.5mg tablets (Alliance Healthcare (Distribution) Ltd)     |
| 55259 | 146711000001100    | Indapamide hemihydrate | Indapamide 2.5mg tablets (Kent Pharmaceuticals Ltd)                   |
| 56296 | 14784911000001103  | Indapamide hemihydrate | Indapamide 2.5mg tablets (Boston Healthcare Ltd)                      |
| 56760 | 18283111000001109  | Indapamide hemihydrate | Indapamide 2.5mg tablets (Strides Shasun (UK) Ltd)                    |
| 70509 | 13579511000001104  | Indapamide hemihydrate | Indapamide 2.5mg tablets (DE Pharmaceuticals)                         |
| 77406 |                    | Indapamide hemihydrate | Natrilix 2.5mg tablets (Mawdsley-Brooks & Company Ltd)                |
| 3056  | 456611000001108    | Indapamide             | Natrilix SR 1.5mg tablets (Servier Laboratories Ltd)                  |
| 5112  | 317954006          | Indapamide             | Indapamide 1.5mg modified-release tablets                             |
| 39447 | 14693611000001102  | Indapamide             | Varbim XL 1.5mg tablets (Teva UK Ltd)                                 |
| 41861 | 14242211000001100  | Indapamide             | Tensaid XL 1.5mg tablets (Mylan)                                      |
| 41885 | 13824811000001102  | Indapamide             | Ethibide XL 1.5mg tablets (Genus Pharmaceuticals Ltd)                 |
| 43184 | 15600711000001107  | Indapamide             | Mapemid XL 1.5mg tablets (Teva UK Ltd)                                |
| 44168 | 15436111000001104  | Indapamide             | Indipam XL 1.5mg tablets (Actavis UK Ltd)                             |
| 46675 | 14033311000001105  | Indapamide             | Indapamide 1.5mg modified-release tablets (A A H Pharmaceuticals Ltd) |
| 59616 | 16737911000001105  | Indapamide             | Rawel XL 1.5mg tablets (Consilient Health Ltd)                        |
| 60020 | 22058211000001103  | Indapamide             | Indapamide 1.5mg modified-release tablets (Waymade Healthcare Plc)    |
| 62066 | 24331611000001104  | Indapamide             | Cardide SR 1.5mg tablets (Teva UK Ltd)                                |
| 62771 | 24175711000001103  | Indapamide             | Indapamide 1.5mg modified-release tablets (DE Pharmaceuticals)        |
| 64066 | 21578911000001105  | Indapamide             | Indapamide 2.5mg/ 5ml oral suspension                                 |
| 74172 | 15101611000001109  | Indapamide             | Indapamide 1.5mg modified-release tablets (Sigma Pharmaceuticals Plc) |
| 77449 |                    | Indapamide             | Natrilix SR 1.5mg tablets (Waymade Healthcare Plc)                    |
| 12110 | 116195001000027108 | Hydroflumethiazide     | "Hydroflumethiazide 50mg Tablet"                                      |
| 13525 | 80235001000027106  | Hydroflumethiazide     | "Hydrenox 50mg Tablet (Knoll Ltd)"                                    |

|       |                    |                                  |                                                                |
|-------|--------------------|----------------------------------|----------------------------------------------------------------|
| 1721  | 132811000001106    | Hydrochlorothiazide/ Triamterene | Dyazide 50mg/ 25mg tablets (AMCo)                              |
| 5416  | 410896007          | Hydrochlorothiazide/ Triamterene | Co-triamterzide 50mg/ 25mg tablets                             |
| 8897  | 191211000001106    | Hydrochlorothiazide/ Triamterene | Triam-Co 50mg/ 25mg tablets (IVAX Pharmaceuticals UK Ltd)      |
| 18726 | 721311000001104    | Hydrochlorothiazide/ Triamterene | Triamaxco 50mg/ 25mg tablets (Ashbourne Pharmaceuticals Ltd)   |
| 47804 | 12779411000001108  | Hydrochlorothiazide/ Triamterene | Co-triamterzide 50mg/ 25mg tablets (A A H Pharmaceuticals Ltd) |
| 67801 | 16160111000001109  | Hydrochlorothiazide/ Triamterene | Dyazide 50mg/ 25mg tablets (Lexon (UK) Ltd)                    |
| 77386 |                    | Hydrochlorothiazide/ Triamterene | Dyazide 50mg/ 25mg tablets (Dowelhurst Ltd)                    |
| 924   | 318121006          | Hydrochlorothiazide/ Amiloride   | Co-amilozide 2.5mg/ 25mg tablets                               |
| 1251  | 314211000001100    | Hydrochlorothiazide/ Amiloride   | Moduret 25 tablets (Merck Sharp & Dohme Ltd)                   |
| 34367 | 925611000001104    | Hydrochlorothiazide/ Amiloride   | Co-amilozide 2.5mg/ 25mg tablets (Wockhardt UK Ltd)            |
| 60354 | 495611000001107    | Hydrochlorothiazide/ Amiloride   | Co-amilozide 2.5mg/ 25mg tablets (Kent Pharmaceuticals Ltd)    |
| 542   | 376209006          | Hydrochlorothiazide              | "Hydrochlorothiazide 25mg tablets"                             |
| 3517  | 376508004          | Hydrochlorothiazide              | "Hydrochlorothiazide 50mg tablets"                             |
| 12440 | 4544011000001109   | Hydrochlorothiazide              | "Hydrosaluric 25mg tablets (Merck Sharp & Dohme Ltd)"          |
| 13363 | 10555001000027106  | Hydrochlorothiazide              | "Esidrex 50mg Tablet (Novartis Pharmaceuticals UK Ltd)"        |
| 16632 | 4546211000001109   | Hydrochlorothiazide              | "Hydrosaluric 50mg tablets (Merck Sharp & Dohme Ltd)"          |
| 17252 | 10545001000027108  | Hydrochlorothiazide              | "Esidrex 25mg Tablet (Novartis Pharmaceuticals UK Ltd)"        |
| 48132 | 250545001000027106 | Hydrochlorothiazide              | "Hydrochlorothiazide Capsule"                                  |
| 57488 | 246525001000027108 | Hydrochlorothiazide              | "Hydrochlorothiazide Oral solution"                            |
| 62516 | 24594211000001108  | Hydrochlorothiazide              | "Hydrochlorothiazide 12.5mg tablets"                           |
| 1369  | 107935001000027101 | Furosemide/ Amiloride            | Furosemide with amiloride 40mg+5mg Tablet                      |
| 4211  | 107945001000027100 | Furosemide/ Amiloride            | Furosemide with amiloride 20mg+2.5mg Tablet                    |
| 5220  | 107955001000027102 | Furosemide/ Amiloride            | Furosemide with amiloride 80mg+10mg Tablet                     |
| 9456  | 159445001000027103 | Furosemide/ Amiloride            | Amiloride 5mg / furosemide 40mg tablets                        |
| 15874 | 159435001000027104 | Furosemide/ Amiloride            | Amiloride 2.5mg / furosemide 20mg tablets                      |
| 18497 | 159455001000027100 | Furosemide/ Amiloride            | Amiloride 10mg / furosemide 80mg tablets                       |
| 47647 | 245685001000027108 | Furosemide/ Amiloride            | Co-amilofruse oral liquid                                      |
| 6     | 317972000          | Furosemide                       | Furosemide 40mg tablets                                        |
| 55    | 317971007          | Furosemide                       | Furosemide 20mg tablets                                        |
| 562   | 107885001000027101 | Furosemide                       | Furosemide 10mg/ ml Injection                                  |
| 3248  | 317973005          | Furosemide                       | Furosemide 500mg tablets                                       |
| 3287  | 199505001000027101 | Furosemide                       | Furosemide 1mg/ ml Oral solution                               |
| 4182  | 701111000001105    | Furosemide                       | Lasix 5mg/ 5ml oral solution (Borg Medicare)                   |
| 4258  | 9611000001104      | Furosemide                       | Lasix 20mg/ 2ml solution for injection ampoules (Sanofi)       |
| 4705  | 145335001000027109 | Furosemide                       | Furosemide 20mg/ 2ml Injection                                 |
| 5249  | 36564411000001102  | Furosemide                       | Furosemide 50mg/ 5ml oral solution sugar free                  |
| 5728  | 318007007          | Furosemide                       | Furosemide 40mg/ 5ml oral solution sugar free                  |
| 5868  | 602811000001100    | Furosemide                       | Frusol 20mg/ 5ml oral solution (Rosemont Pharmaceuticals Ltd)  |
| 6118  | 318006003          | Furosemide                       | Furosemide 20mg/ 5ml oral solution sugar free                  |
| 7606  | 79411000001107     | Furosemide                       | Lasix 40mg tablets (Sanofi)                                    |
| 7799  | 701611000001102    | Furosemide                       | Lasix 20mg tablets (Borg Medicare)                             |
| 9680  | 494811000001105    | Furosemide                       | Frusol 40mg/ 5ml oral solution (Rosemont Pharmaceuticals Ltd)  |
| 10392 | 829911000001102    | Furosemide                       | Lasix 500mg tablets (Sanofi)                                   |

|       |                    |            |                                                                              |
|-------|--------------------|------------|------------------------------------------------------------------------------|
| 10422 | 37095001000027109  | Furosemide | Lasix 50mg/ 5ml Injection (Hoechst UK Ltd)                                   |
| 12318 | 153285001000027109 | Furosemide | Lasix 250mg/ 25ml Injection (Hoechst Marion Roussel)                         |
| 14761 | 99311000001108     | Furosemide | Frusid 40mg tablets (Dr Reddy's Laboratories (UK) Ltd)                       |
| 14837 | 855611000001109    | Furosemide | Frusol 50mg/ 5ml oral solution (Rosemont Pharmaceuticals Ltd)                |
| 16206 | 714311000001107    | Furosemide | Froop 40mg tablets (Ashbourne Pharmaceuticals Ltd)                           |
| 18716 | 40555001000027108  | Furosemide | Dryptal 10mg/ ml Injection (Berk Pharmaceuticals Ltd)                        |
| 19056 | 60235001000027109  | Furosemide | Furosemide 50mg/ 5ml sugar free Oral solution (Rosemont Pharmaceuticals Ltd) |
| 19192 | 118425001000027108 | Furosemide | Furosemide 40mg Tablet (M & A Pharmachem Ltd)                                |
| 19194 | 17211000001105     | Furosemide | Furosemide 20mg tablets (Teva UK Ltd)                                        |
| 19258 | 36061511000001103  | Furosemide | Furosemide 50mg/ 5ml solution for injection ampoules                         |
| 20538 | 1795001000027107   | Furosemide | Frumax 40mg Tablet (Ashbourne Pharmaceuticals Ltd)                           |
| 21849 | 8805001000027103   | Furosemide | Dryptal 40mg Tablet (Berk Pharmaceuticals Ltd)                               |
| 24835 | 23365001000027103  | Furosemide | Min-i-jet furosemide 10mg/ ml Injection (Celltech Pharma Europe Ltd)         |
| 25334 | 119611000001105    | Furosemide | Furosemide 500mg tablets (A A H Pharmaceuticals Ltd)                         |
| 25717 | 147711000001102    | Furosemide | Furosemide 40mg tablets (Mylan)                                              |
| 26292 | 82155001000027100  | Furosemide | Diuresal 40mg Tablet (Lagap)                                                 |
| 27447 | 445111000001108    | Furosemide | Furosemide 40mg tablets (Wockhardt UK Ltd)                                   |
| 27690 | 100611000001101    | Furosemide | Furosemide 40mg tablets (A A H Pharmaceuticals Ltd)                          |
| 27696 | 765411000001103    | Furosemide | Furosemide 40mg tablets (Kent Pharmaceuticals Ltd)                           |
| 27926 | 229711000001109    | Furosemide | Furosemide 20mg tablets (Mylan)                                              |
| 29780 | 13295001000027107  | Furosemide | Furosemide 20mg Tablet (C P Pharmaceuticals Ltd)                             |
| 30625 | 202711000001106    | Furosemide | Furosemide 20mg tablets (A A H Pharmaceuticals Ltd)                          |
| 30875 | 34193711000001108  | Furosemide | Furosemide 250mg/ 25ml solution for injection ampoules                       |
| 31548 | 631611000001100    | Furosemide | Furosemide 20mg tablets (Actavis UK Ltd)                                     |
| 32277 | 36061611000001104  | Furosemide | Furosemide 80mg/ 8ml solution for injection pre-filled syringes              |
| 32896 | 8751711000001106   | Furosemide | Furosemide 40mg tablets (Ranbaxy (UK) Ltd)                                   |
| 32918 | 662811000001104    | Furosemide | Furosemide 20mg tablets (Sandoz Ltd)                                         |
| 34006 | 351511000001105    | Furosemide | Furosemide 40mg tablets (Actavis UK Ltd)                                     |
| 34374 | 472211000001108    | Furosemide | Furosemide 40mg tablets (Teva UK Ltd)                                        |
| 34557 | 856211000001101    | Furosemide | Furosemide 40mg tablets (IVAX Pharmaceuticals UK Ltd)                        |
| 35162 | 36061411000001102  | Furosemide | Furosemide 20mg/ 2ml solution for injection ampoules                         |
| 36190 | 318010000          | Furosemide | Furosemide 5mg/ 5ml oral solution sugar free                                 |
| 40247 | 46575001000027100  | Furosemide | Furosemide 10mg/ ml Injection (Martindale Pharmaceuticals Ltd)               |
| 41292 | 539911000001101    | Furosemide | Furosemide 20mg tablets (Wockhardt UK Ltd)                                   |
| 41405 | 752711000001106    | Furosemide | Furosemide 500mg tablets (Teva UK Ltd)                                       |
| 41828 | 822211000001103    | Furosemide | Furosemide 500mg tablets (Actavis UK Ltd)                                    |
| 42388 | 10305811000001105  | Furosemide | Furosemide 40mg/ 5ml oral solution sugar free (Focus Pharmaceuticals Ltd)    |
| 42488 | 10214011000001105  | Furosemide | Furosemide 40mg/ 5ml oral solution sugar free (A A H Pharmaceuticals Ltd)    |
| 46116 | 58505001000027108  | Furosemide | Furosemide 10mg/ ml Injection (Antigen Pharmaceuticals)                      |
| 46699 | 9801311000001103   | Furosemide | Furosemide 40mg tablets (Almus Pharmaceuticals Ltd)                          |
| 46948 | 10429011000001100  | Furosemide | Furosemide 40mg tablets (Arrow Generics Ltd)                                 |
| 47815 | 13335001000027109  | Furosemide | Furosemide 20mg Tablet (Celltech Pharma Europe Ltd)                          |
| 49268 | 12088211000001109  | Furosemide | Furosemide 50mg/ 5ml oral suspension                                         |

|       |                    |            |                                                                                               |
|-------|--------------------|------------|-----------------------------------------------------------------------------------------------|
| 51983 | 13893511000001107  | Furosemide | Furosemide 5mg/ 5ml oral suspension                                                           |
| 52045 | 20176911000001106  | Furosemide | Furosemide 250mg/ 5ml solution for injection vials                                            |
| 52887 | 725611000001107    | Furosemide | Furosemide 20mg/ 2ml solution for injection ampoules (A A H Pharmaceuticals Ltd)              |
| 52900 | 2898811000001106   | Furosemide | Furosemide 80mg/ 8ml solution for injection Minijet pre-filled syringes (UCB Pharma Ltd)      |
| 53967 | 16052611000001100  | Furosemide | Furosemide 20mg tablets (Bristol Laboratories Ltd)                                            |
| 54825 | 15089311000001105  | Furosemide | Furosemide 20mg tablets (Sigma Pharmaceuticals Plc)                                           |
| 55738 | 5088711000001101   | Furosemide | Furosemide 50mg/ 5ml solution for injection ampoules (Hameln Pharmaceuticals Ltd)             |
| 56051 | 503711000001106    | Furosemide | Furosemide 20mg tablets (Kent Pharmaceuticals Ltd)                                            |
| 56375 | 18461911000001109  | Furosemide | Furosemide 40mg tablets (Accord Healthcare Ltd)                                               |
| 57600 | 120011000001102    | Furosemide | Furosemide 20mg/ 2ml solution for injection ampoules (Alliance Healthcare (Distribution) Ltd) |
| 57610 | 10305611000001106  | Furosemide | Furosemide 20mg/ 5ml oral solution sugar free (Focus Pharmaceuticals Ltd)                     |
| 58078 | 12088911000001100  | Furosemide | Furosemide 8mg/ 5ml oral solution                                                             |
| 58224 | 12035011000001100  | Furosemide | Furosemide 10mg/ 5ml oral solution                                                            |
| 59030 | 12036211000001104  | Furosemide | Furosemide 20mg/ 5ml oral solution                                                            |
| 59290 | 121411000001102    | Furosemide | Furosemide 20mg tablets (Alliance Healthcare (Distribution) Ltd)                              |
| 59884 | 17911411000001106  | Furosemide | Furosemide 20mg tablets (Phoenix Healthcare Distribution Ltd)                                 |
| 59911 | 139011000001107    | Furosemide | Furosemide 40mg tablets (Alliance Healthcare (Distribution) Ltd)                              |
| 59939 | 12036311000001107  | Furosemide | Furosemide 20mg/ 5ml oral suspension                                                          |
| 60291 | 19309711000001101  | Furosemide | Furosemide 40mg tablets (AMCo)                                                                |
| 60465 | 13893411000001108  | Furosemide | Furosemide 5mg/ 5ml oral solution                                                             |
| 61365 | 12087811000001106  | Furosemide | Furosemide 40mg/ 5ml oral suspension                                                          |
| 61475 | 23909911000001105  | Furosemide | Furosemide 20mg tablets (DE Pharmaceuticals)                                                  |
| 63237 | 14789111000001100  | Furosemide | Furosemide 20mg tablets (Boston Healthcare Ltd)                                               |
| 64255 | 12036811000001103  | Furosemide | Furosemide 2mg/ 5ml oral solution                                                             |
| 64677 | 23910211000001105  | Furosemide | Furosemide 40mg tablets (DE Pharmaceuticals)                                                  |
| 64745 | 12089011000001109  | Furosemide | Furosemide 8mg/ 5ml oral suspension                                                           |
| 65583 | 12087311000001102  | Furosemide | Furosemide 3mg/ 5ml oral solution                                                             |
| 66017 | 9800811000001104   | Furosemide | Furosemide 20mg tablets (Almus Pharmaceuticals Ltd)                                           |
| 66149 | 12087511000001108  | Furosemide | Furosemide 4.5mg/ 5ml oral solution                                                           |
| 67910 | 12087711000001103  | Furosemide | Furosemide 40mg/ 5ml oral solution                                                            |
| 68068 | 8519911000001102   | Furosemide | Furosemide 4mg/ 5ml oral solution                                                             |
| 69338 | 60225001000027107  | Furosemide | Furosemide 40mg/ 5ml sugar free Oral solution (Rosemont Pharmaceuticals Ltd)                  |
| 69445 | 18706911000001106  | Furosemide | Furosemide 40mg/ 5ml oral solution sugar free (Sigma Pharmaceuticals Plc)                     |
| 70650 | 34537111000001101  | Furosemide | Furosemide 50mg/ 5ml solution for injection ampoules (Peckforton Pharmaceuticals Ltd)         |
| 71406 | 12035811000001106  | Furosemide | Furosemide 1mg/ 5ml oral solution                                                             |
| 71950 | 22018711000001104  | Furosemide | Furosemide 20mg tablets (Waymade Healthcare Plc)                                              |
| 73171 | 246455001000027101 | Furosemide | Furosemide Oral solution                                                                      |
| 73480 | 60215001000027103  | Furosemide | Furosemide 20mg/ 5ml sugar free Oral solution (Rosemont Pharmaceuticals Ltd)                  |
| 74381 | 12087411000001109  | Furosemide | Furosemide 3mg/ 5ml oral suspension                                                           |
| 74677 | 30133911000001101  | Furosemide | Furosemide 40mg tablets (Mawdsley-Brooks & Company Ltd)                                       |
| 74926 | 28986611000001105  | Furosemide | Furosemide 20mg tablets (Crescent Pharma Ltd)                                                 |
| 75855 |                    | Furosemide | Furosemide 10mg/ 5ml oral suspension                                                          |

|       |                    |                            |                                                               |
|-------|--------------------|----------------------------|---------------------------------------------------------------|
| 76157 |                    | Furosemide                 | Furosemide 50mg/ 5ml oral solution                            |
| 76323 |                    | Furosemide                 | Furosemide 40mg tablets (Crescent Pharma Ltd)                 |
| 76934 |                    | Furosemide                 | Furosemide 6.5mg/ 5ml oral solution                           |
| 77333 |                    | Furosemide                 | Aluzine 20mg Tablet (M A Steinhard Ltd)                       |
| 77566 |                    | Furosemide                 | Furosemide 40mg tablets (Bristol Laboratories Ltd)            |
| 12354 | 99155001000027108  | Etacrynic Acid             | Etacrynic 50mg tablets                                        |
| 18650 | 9585001000027101   | Etacrynic Acid             | Edecrin 50mg Tablet (Merck Sharp & Dohme Ltd)                 |
| 32002 | 179865001000027103 | Etacrynic Acid             | Etacrynic 50mg/ vial injection                                |
| 1170  | 317940003          | Cyclopenthiiazide          | "Cyclopenthiiazide 500microgram tablets"                      |
| 2046  | 487811000001100    | Cyclopenthiiazide          | "Navidrex 500microgram tablets (AMCo)"                        |
| 12546 | 40975001000027100  | Chlortalidone/ Triamterene | Kalspare Tablet (Dominion Pharma)                             |
| 12547 | 318100006          | Chlortalidone/ Triamterene | Triamterene 50mg / Chlortalidone 50mg tablets                 |
| 16498 | 3252011000001105   | Chlortalidone/ Triamterene | Kalspare tablets (DHP Healthcare Ltd)                         |
| 605   | 317935006          | Chlortalidone              | Chlortalidone 50mg tablets                                    |
| 3054  | 14435001000027104  | Chlortalidone              | Hygroton 100mg Tablet (Alliance Pharmaceuticals Ltd)          |
| 3548  | 101645001000027102 | Chlortalidone              | Chlortalidone 100mg tablets                                   |
| 3997  | 285911000001101    | Chlortalidone              | Hygroton 50mg tablets (Alliance Pharmaceuticals Ltd)          |
| 74942 | 8359911000001106   | Chlortalidone              | Chlortalidone 50mg/ 5ml oral suspension                       |
| 75383 | 376346007          | Chlortalidone              | Chlortalidone 25mg tablets                                    |
| 6816  | 408039005          | Chlorothiazide             | "Chlorothiazide 250mg/5ml oral suspension"                    |
| 8836  | 101315001000027103 | Chlorothiazide             | "Chlorothiazide 500mg tablets"                                |
| 13246 | 8358511000001105   | Chlorothiazide             | "Chlorothiazide 150mg/5ml oral suspension"                    |
| 17720 | 27705001000027105  | Chlorothiazide             | "Saluric 500mg Tablet (Merck Sharp & Dohme Ltd)"              |
| 33724 | 7652811000001107   | Chlorothiazide             | "Diuril 250mg/5ml oral suspension (Imported (United States))" |
| 54341 | 12015711000001107  | Chlorothiazide             | "Chlorothiazide 5mg/5ml oral suspension"                      |
| 54679 | 395516007          | Chlorothiazide             | "Chlorothiazide 250mg tablets"                                |
| 55889 | 243885001000027106 | Chlorothiazide             | "Chlorothiazide oral solution"                                |
| 56804 | 8358711000001100   | Chlorothiazide             | "Chlorothiazide 25mg/5ml oral suspension"                     |
| 59834 | 12503011000001109  | Chlorothiazide             | "Chlorothiazide 250mg/5ml oral solution"                      |
| 60603 | 8359111000001108   | Chlorothiazide             | "Chlorothiazide 50mg/5ml oral suspension"                     |
| 63227 | 12016611000001108  | Chlorothiazide             | "Chlorothiazide 70mg/5ml oral solution"                       |
| 64798 | 12431311000001107  | Chlorothiazide             | "Chlorothiazide 120mg/5ml oral solution"                      |
| 71871 | 8359211000001102   | Chlorothiazide             | "Chlorothiazide 60mg/5ml oral suspension"                     |
| 73441 | 12502211000001105  | Chlorothiazide             | "Chlorothiazide 200mg/5ml oral solution"                      |
| 74153 | 12431011000001109  | Chlorothiazide             | "Chlorothiazide 10mg/5ml oral solution"                       |
| 75957 |                    | Chlorothiazide             | "Chlorothiazide 5mg/5ml oral solution"                        |
| 76031 |                    | Chlorothiazide             | "Chlorothiazide 250mg/5ml oral solution (Special Order)"      |
| 77162 |                    | Chlorothiazide             | "Chlorothiazide 12.5mg/5ml oral solution"                     |
| 77850 |                    | Chlorothiazide             | "Chlorothiazide 500mg/5ml oral solution"                      |
| 2493  | 33911000001104     | Bumetanide/ Amiloride      | Burinex A 5mg/ 1mg tablets (LEO Pharma)                       |
| 2495  | 189885001000027104 | Bumetanide/ Amiloride      | Bumetanide with Amiloride tablets                             |
| 14587 | 318097001          | Bumetanide/ Amiloride      | Amiloride 5mg / Bumetanide 1mg tablets                        |
| 814   | 318021009          | Bumetanide                 | Bumetanide 1mg tablets                                        |

|       |                    |                           |                                                                   |
|-------|--------------------|---------------------------|-------------------------------------------------------------------|
| 2788  | 846411000001100    | Bumetanide                | Burinex 1mg tablets (LEO Pharma)                                  |
| 5218  | 318023007          | Bumetanide                | Bumetanide 1mg/ 5ml oral solution sugar free                      |
| 7806  | 318022002          | Bumetanide                | Bumetanide 5mg tablets                                            |
| 12226 | 37875001000027101  | Bumetanide                | Burinex 1mg/ 5ml Oral solution (LEO Pharma)                       |
| 12294 | 521811000001107    | Bumetanide                | Burinex 5mg tablets (LEO Pharma)                                  |
| 15341 | 35125001000027107  | Bumetanide                | Burinex 0.5mg/ ml Injection (LEO Pharma)                          |
| 19300 | 35912911000001108  | Bumetanide                | Bumetanide 2mg/ 4ml solution for injection ampoules               |
| 30913 | 232615001000027108 | Bumetanide                | Betinex 1mg Tablet (Berk Pharmaceuticals Ltd)                     |
| 31932 | 689011000001100    | Bumetanide                | Bumetanide 1mg tablets (C P Pharmaceuticals Ltd)                  |
| 32091 | 43411000001106     | Bumetanide                | Bumetanide 1mg tablets (A A H Pharmaceuticals Ltd)                |
| 34613 | 102011000001107    | Bumetanide                | Bumetanide 5mg tablets (Teva UK Ltd)                              |
| 34934 | 402111000001109    | Bumetanide                | Bumetanide 1mg tablets (Mylan)                                    |
| 36767 | 226011000001101    | Bumetanide                | Bumetanide 1mg tablets (IVAX Pharmaceuticals UK Ltd)              |
| 39602 | 539611000001107    | Bumetanide                | Bumetanide 1mg tablets (Actavis UK Ltd)                           |
| 45305 | 274211000001100    | Bumetanide                | Bumetanide 1mg tablets (Teva UK Ltd)                              |
| 55548 | 731811000001106    | Bumetanide                | Bumetanide 1mg tablets (Alliance Healthcare (Distribution) Ltd)   |
| 62024 | 376211000001101    | Bumetanide                | Bumetanide 5mg tablets (A A H Pharmaceuticals Ltd)                |
| 63555 | 17810611000001109  | Bumetanide                | Bumetanide 1mg tablets (Phoenix Healthcare Distribution Ltd)      |
| 66195 | 9793511000001108   | Bumetanide                | Bumetanide 1mg tablets (Almus Pharmaceuticals Ltd)                |
| 73152 | 21804811000001102  | Bumetanide                | Bumetanide 1mg tablets (Waymade Healthcare Plc)                   |
| 73195 | 22622811000001107  | Bumetanide                | Bumetanide 1mg tablets (DE Pharmaceuticals)                       |
| 74814 | 14106511000001105  | Bumetanide                | Bumetanide 1mg tablets (Niche Generics Ltd)                       |
| 30272 | 122075001000027106 | Benzthiazide/ Triamterene | Benthiazide with Triamterene capsules                             |
| 2     | 317919004          | Bendroflumethiazide       | "Bendroflumethiazide 2.5mg tablets"                               |
| 58    | 317920005          | Bendroflumethiazide       | "Bendroflumethiazide 5mg tablets"                                 |
| 1209  | 817911000001100    | Bendroflumethiazide       | "Neo-Naclex 5mg tablets (Mercury Pharma Group Ltd)"               |
| 7351  | 8306811000001101   | Bendroflumethiazide       | "Bendroflumethiazide 2.5mg/5ml oral suspension"                   |
| 7698  | 120911000001103    | Bendroflumethiazide       | "Aprinox 5mg tablets (Amdipharm Plc)"                             |
| 8526  | 672111000001100    | Bendroflumethiazide       | "Aprinox 2.5mg tablets (AMCo)"                                    |
| 18973 | 35075001000027101  | Bendroflumethiazide       | "Centyl 2.5mg Tablet (Edwin Burgess Ltd)"                         |
| 21803 | 3215001000027107   | Bendroflumethiazide       | "Berkozide 2.5mg Tablet (Berk Pharmaceuticals Ltd)"               |
| 21867 | 3225001000027103   | Bendroflumethiazide       | "Berkozide 5mg Tablet (Berk Pharmaceuticals Ltd)"                 |
| 23427 | 501911000001107    | Bendroflumethiazide       | "Bendroflumethiazide 5mg tablets (A A H Pharmaceuticals Ltd)"     |
| 24189 | 197885001000027105 | Bendroflumethiazide       | "Neo-bendromax 2.5mg Tablet (Ashbourne Pharmaceuticals Ltd)"      |
| 24190 | 197895001000027109 | Bendroflumethiazide       | "Neo-bendromax 5mg Tablet (Ashbourne Pharmaceuticals Ltd)"        |
| 27256 | 454811000001100    | Bendroflumethiazide       | "Bendroflumethiazide 2.5mg tablets (Wockhardt UK Ltd)"            |
| 27689 | 464311000001103    | Bendroflumethiazide       | "Bendroflumethiazide 2.5mg tablets (IVAX Pharmaceuticals UK Ltd)" |
| 29991 | 35085001000027106  | Bendroflumethiazide       | "Centyl 5mg Tablet (Edwin Burgess Ltd)"                           |
| 31670 | 779811000001105    | Bendroflumethiazide       | "Bendroflumethiazide 2.5mg tablets (Teva UK Ltd)"                 |
| 31820 | 159711000001108    | Bendroflumethiazide       | "Bendroflumethiazide 5mg tablets (Wockhardt UK Ltd)"              |
| 33415 | 914811000001108    | Bendroflumethiazide       | "Bendroflumethiazide 2.5mg tablets (Mylan)"                       |
| 33651 | 772511000001103    | Bendroflumethiazide       | "Bendroflumethiazide 2.5mg tablets (A A H Pharmaceuticals Ltd)"   |
| 34059 | 1711000001109      | Bendroflumethiazide       | "Bendroflumethiazide 2.5mg tablets (Actavis UK Ltd)"              |

|       |                    |                                 |                                                                              |
|-------|--------------------|---------------------------------|------------------------------------------------------------------------------|
| 34124 | 720911000001105    | Bendroflumethiazide             | "Bendroflumethiazide 5mg tablets (Actavis UK Ltd)"                           |
| 34602 | 17195711000001104  | Bendroflumethiazide             | "Bendroflumethiazide 2.5mg tablets (Sovereign Medical Ltd)"                  |
| 34803 | 113045001000027101 | Bendroflumethiazide             | "Bendroflumethiazide 2.5mg Tablet (Regent Laboratories Ltd)"                 |
| 40149 | 320511000001104    | Bendroflumethiazide             | "Bendroflumethiazide 5mg tablets (IVAX Pharmaceuticals UK Ltd)"              |
| 40886 | 9792811000001103   | Bendroflumethiazide             | "Bendroflumethiazide 2.5mg tablets (Almus Pharmaceuticals Ltd)"              |
| 41517 | 436711000001100    | Bendroflumethiazide             | "Bendroflumethiazide 5mg tablets (Teva UK Ltd)"                              |
| 46302 | 18149011000001101  | Bendroflumethiazide             | "Neo-Naclex 2.5mg tablets (AMCo)"                                            |
| 47844 | 750511000001102    | Bendroflumethiazide             | "Bendroflumethiazide 2.5mg tablets (Kent Pharmaceuticals Ltd)"               |
| 53812 | 244535001000027101 | Bendroflumethiazide             | "Bendroflumethiazide oral solution"                                          |
| 64907 | 9793111000001104   | Bendroflumethiazide             | "Bendroflumethiazide 5mg tablets (Almus Pharmaceuticals Ltd)"                |
| 66517 | 8307011000001105   | Bendroflumethiazide             | "Bendroflumethiazide 1.25mg/5ml oral suspension"                             |
| 67737 | 11009711000001106  | Bendroflumethiazide             | "Bendroflumethiazide 2.5mg tablets (Dr Reddy's Laboratories (UK) Ltd)"       |
| 67738 | 11010111000001102  | Bendroflumethiazide             | "Bendroflumethiazide 5mg tablets (Dr Reddy's Laboratories (UK) Ltd)"         |
| 67780 | 22617011000001105  | Bendroflumethiazide             | "Bendroflumethiazide 5mg tablets (DE Pharmaceuticals)"                       |
| 70989 | 20323211000001103  | Bendroflumethiazide             | "Bendroflumethiazide 2.5mg tablets (Genesis Pharmaceuticals Ltd)"            |
| 72042 | 288611000001101    | Bendroflumethiazide             | "Bendroflumethiazide 2.5mg tablets (Alliance Healthcare (Distribution) Ltd)" |
| 72083 | 21782811000001109  | Bendroflumethiazide             | "Bendroflumethiazide 5mg tablets (Waymade Healthcare Plc)"                   |
| 72914 | 6685001000027101   | Bendroflumethiazide             | "Bendroflumethiazide 2.5mg Tablet (Celltech Pharma Europe Ltd)"              |
| 77681 |                    | Bendroflumethiazide             | "Bendroflumethiazide 5mg tablets (Mylan)"                                    |
| 348   | 19555001000027107  | Amiloride / Hydrochlorothiazide | Moduretic Tablet (Bristol-Myers Squibb Pharmaceuticals Ltd)                  |
| 923   | 377566005          | Amiloride / Hydrochlorothiazide | Co-amilozone 5mg/ 50mg tablets                                               |
| 2002  | 159475001000027102 | Amiloride / Hydrochlorothiazide | Amiloride 5mg / hydrochlorothiazide 50mg tablets                             |
| 3293  | 19565001000027103  | Amiloride / Hydrochlorothiazide | Moduretic Oral solution (Bristol-Myers Squibb Pharmaceuticals Ltd)           |
| 3701  | 159485001000027107 | Amiloride / Hydrochlorothiazide | Amiloride 2.5mg / hydrochlorothiazide 25mg tablets                           |
| 4034  | 159495001000027106 | Amiloride / Hydrochlorothiazide | Amiloride 5mg / hydrochlorothiazide 50mg/ 5ml solution                       |
| 8058  | 116145001000027100 | Amiloride / Hydrochlorothiazide | Normetic Tablet (Abbott Laboratories Ltd)                                    |
| 18361 | 712211000001108    | Amiloride / Hydrochlorothiazide | Amilmaxco 5mg/ 50mg tablets (Ashbourne Pharmaceuticals Ltd)                  |
| 18733 | 169595001000027101 | Amiloride / Hydrochlorothiazide | Co-amilozone 5mg with 50mg/ ml oral solution                                 |
| 19890 | 116045001000027108 | Amiloride / Hydrochlorothiazide | Hydrochlorothiazide with amiloride 25mgwith2.5mg Tablet                      |
| 20066 | 636611000001107    | Amiloride / Hydrochlorothiazide | Amil-Co 5mg/ 50mg tablets (IVAX Pharmaceuticals UK Ltd)                      |
| 22923 | 116065001000027102 | Amiloride / Hydrochlorothiazide | Hydrochlorothiazide with amiloride 50mg with 5mg Tablet                      |
| 24008 | 181425001000027109 | Amiloride / Hydrochlorothiazide | Vasetic Tablet (Shire Pharmaceuticals Ltd)                                   |
| 25500 | 152595001000027107 | Amiloride / Hydrochlorothiazide | Hypertane 50 Tablet (Schwarz Pharma Ltd)                                     |
| 26219 | 211855001000027109 | Amiloride / Hydrochlorothiazide | Zida-co 5mg+50mg Tablet (Opus Pharmaceuticals Ltd)                           |
| 26220 | 151865001000027108 | Amiloride / Hydrochlorothiazide | Delvas Tablet (Berk Pharmaceuticals Ltd)                                     |
| 31150 | 831011000001103    | Amiloride / Hydrochlorothiazide | Co-amilozone 5mg/ 50mg tablets (IVAX Pharmaceuticals UK Ltd)                 |
| 41556 | 26611000001101     | Amiloride / Hydrochlorothiazide | Co-amilozone 5mg/ 50mg tablets (Teva UK Ltd)                                 |
| 42142 | 453811000001103    | Amiloride / Hydrochlorothiazide | Moduretic 5mg/ 50mg tablets (Merck Sharp & Dohme Ltd)                        |
| 46916 | 17611000001107     | Amiloride / Hydrochlorothiazide | Co-amilozone 5mg/ 50mg tablets (A A H Pharmaceuticals Ltd)                   |
| 62249 | 552711000001105    | Amiloride / Hydrochlorothiazide | Co-amilozone 5mg/ 50mg tablets (Alliance Healthcare (Distribution) Ltd)      |
| 62700 | 17885211000001100  | Amiloride / Hydrochlorothiazide | Co-amilozone 5mg/ 50mg tablets (Phoenix Healthcare Distribution Ltd)         |
| 73337 | 366811000001105    | Amiloride / Hydrochlorothiazide | Co-amilozone 5mg/ 50mg tablets (Wockhardt UK Ltd)                            |
| 74017 | 5392111000001103   | Amiloride / Hydrochlorothiazide | Moduretic 5mg/ 50mg tablets (Waymade Healthcare Plc)                         |

|       |                    |                                 |                                                                            |
|-------|--------------------|---------------------------------|----------------------------------------------------------------------------|
| 75069 | 30015911000001100  | Amiloride / Hydrochlorothiazide | Co-amilozide 2.5mg/ 25mg tablets (Mawdsley-Brooks & Company Ltd)           |
| 56    | 318136009          | Amiloride / Furosemide          | Co-amilofruse 5mg/ 40mg tablets                                            |
| 193   | 318135008          | Amiloride / Furosemide          | Co-amilofruse 2.5mg/ 20mg tablets                                          |
| 211   | 40605001000027105  | Amiloride / Furosemide          | Frumil 40mg+5mg Tablet (Helios Healthcare Ltd)                             |
| 1301  | 40615001000027107  | Amiloride / Furosemide          | Frumil Is 20mg+2.5mg Tablet (Helios Healthcare Ltd)                        |
| 2772  | 678511000001106    | Amiloride / Furosemide          | Lasoride 5mg/ 40mg tablets (Sanofi)                                        |
| 3793  | 318137000          | Amiloride / Furosemide          | Co-amilofruse 10mg/ 80mg tablets                                           |
| 4873  | 818511000001106    | Amiloride / Furosemide          | Fru-Co 5mg/ 40mg tablets (Teva UK Ltd)                                     |
| 9431  | 222555001000027108 | Amiloride / Furosemide          | Frusemek 40mg+5mg Tablet (Approved Prescription Services Ltd)              |
| 13435 | 82611000001106     | Amiloride / Furosemide          | Frumil Forte 10mg/ 80mg tablets (Sanofi)                                   |
| 18332 | 196835001000027101 | Amiloride / Furosemide          | Aridil 20mg+2.5mg Tablet (C P Pharmaceuticals Ltd)                         |
| 21938 | 331311000001103    | Amiloride / Furosemide          | Froop Co 5mg/ 40mg tablets (Ashbourne Pharmaceuticals Ltd)                 |
| 25965 | 213911000001104    | Amiloride / Furosemide          | Co-amilofruse 2.5mg/ 20mg tablets (Wockhardt UK Ltd)                       |
| 28129 | 891211000001100    | Amiloride / Furosemide          | Co-amilofruse 5mg/ 40mg tablets (Teva UK Ltd)                              |
| 30773 | 47575001000027101  | Amiloride / Furosemide          | Co-amilofruse 5mg+40mg Tablet (Berk Pharmaceuticals Ltd)                   |
| 31773 | 380811000001106    | Amiloride / Furosemide          | Co-amilofruse 5mg/ 40mg tablets (Wockhardt UK Ltd)                         |
| 33527 | 428711000001104    | Amiloride / Furosemide          | Co-amilofruse 5mg/ 40mg tablets (Mylan)                                    |
| 33658 | 11311000001108     | Amiloride / Furosemide          | Co-amilofruse 5mg/ 40mg tablets (A A H Pharmaceuticals Ltd)                |
| 34280 | 901811000001108    | Amiloride / Furosemide          | Co-amilofruse 2.5mg/ 20mg tablets (Sandoz Ltd)                             |
| 34622 | 457611000001105    | Amiloride / Furosemide          | Co-amilofruse 10mg/ 80mg tablets (Wockhardt UK Ltd)                        |
| 38901 | 550711000001106    | Amiloride / Furosemide          | Frumil LS 20mg/ 2.5mg tablets (Sanofi)                                     |
| 39807 | 427411000001106    | Amiloride / Furosemide          | Frumil 40mg/ 5mg tablets (Sanofi)                                          |
| 41533 | 242811000001109    | Amiloride / Furosemide          | Co-amilofruse 2.5mg/ 20mg tablets (Teva UK Ltd)                            |
| 41719 | 667111000001108    | Amiloride / Furosemide          | Co-amilofruse 5mg/ 40mg tablets (Actavis UK Ltd)                           |
| 43508 | 295411000001105    | Amiloride / Furosemide          | Co-amilofruse 5mg/ 40mg tablets (Sandoz Ltd)                               |
| 57908 | 571911000001103    | Amiloride / Furosemide          | Co-amilofruse 5mg/ 40mg tablets (Kent Pharmaceuticals Ltd)                 |
| 59412 | 21939011000001108  | Amiloride / Furosemide          | Co-amilofruse 5mg/ 40mg tablets (Waymade Healthcare Plc)                   |
| 60258 | 19189511000001103  | Amiloride / Furosemide          | Co-amilofruse 2.5mg/ 20mg tablets (Milpharm Ltd)                           |
| 71348 | 5372111000001107   | Amiloride / Furosemide          | Frumil 40mg/ 5mg tablets (Waymade Healthcare Plc)                          |
| 71377 | 10855211000001104  | Amiloride / Furosemide          | Frumil LS 20mg/ 2.5mg tablets (Waymade Healthcare Plc)                     |
| 73993 | 14244511000001107  | Amiloride / Furosemide          | Frumil 40mg/ 5mg tablets (Sigma Pharmaceuticals Plc)                       |
| 74800 | 16182411000001100  | Amiloride / Furosemide          | Frumil 40mg/ 5mg tablets (Lexon (UK) Ltd)                                  |
| 2255  | 535711000001100    | Amiloride / Cyclopenthiiazide   | Navispare 2.5mg/ 250microgram tablets (AMCo)                               |
| 5727  | 318096005          | Amiloride / Cyclopenthiiazide   | Amiloride 2.5mg / Cyclopenthiiazide 250microgram tablets                   |
| 1060  | 318052005          | Amiloride                       | Amiloride 5mg tablets                                                      |
| 9935  | 35900111000001108  | Amiloride                       | Amiloride 5mg/ 5ml oral solution sugar free                                |
| 13352 | 18905001000027107  | Amiloride                       | Midamor 5mg Tablet (MSD Thomas Morson Pharmaceuticals)                     |
| 24893 | 181285001000027104 | Amiloride                       | Amilospare Tablet (Ashbourne Pharmaceuticals Ltd)                          |
| 26217 | 156675001000027106 | Amiloride                       | Berkamil 5mg Tablet (Berk Pharmaceuticals Ltd)                             |
| 31375 | 799711000001108    | Amiloride                       | Amilamont 5mg/ 5ml oral solution sugar free (Rosemont Pharmaceuticals Ltd) |
| 33837 | 382611000001108    | Amiloride                       | Amiloride 5mg tablets (A A H Pharmaceuticals Ltd)                          |
| 34324 | 446011000001103    | Amiloride                       | Amiloride 5mg tablets (Teva UK Ltd)                                        |
| 34750 | 754911000001104    | Amiloride                       | Amiloride 5mg tablets (Actavis UK Ltd)                                     |



|       |                    |                                            |                                                                                                     |
|-------|--------------------|--------------------------------------------|-----------------------------------------------------------------------------------------------------|
| 41630 | 3955001000027101   | Amiloride                                  | Amiloride 5mg Tablet (IVAX Pharmaceuticals UK Ltd)                                                  |
| 43523 | 505611000001103    | Amiloride                                  | Amiloride 5mg tablets (Mylan)                                                                       |
| 44254 | 86595001000027100  | Amiloride                                  | Amiloride 5.67mg tablets                                                                            |
| 46930 | 533611000001105    | Amiloride                                  | Amiloride 5mg tablets (Wockhardt UK Ltd)                                                            |
| 60149 | 8274111000001104   | Amiloride                                  | Amiloride 5mg/ 5ml oral suspension                                                                  |
| 76165 |                    | Amiloride                                  | Amiloride 5mg tablets (Accord Healthcare Ltd)                                                       |
| 36519 | 10595001000027100  | Potassium Chloride/<br>Hydrochlorothiazide | "Esidrex -k Tablet (Novartis Pharmaceuticals UK Ltd)"                                               |
| 1125  | 20765001000027100  | Potassium Chloride/<br>Cyclopenthiiazide   | "Navidrex -k Tablet (Novartis Pharmaceuticals UK Ltd)"                                              |
| 2833  | 104585001000027108 | Potassium Chloride/<br>Cyclopenthiiazide   | "CYCLOPENTHIAZIDE -K tablets"                                                                       |
| 1211  | 35910111000001106  | Potassium chloride/<br>Bendroflumethiazide | "Bendroflumethiazide 2.5mg / Potassium chloride 630mg (potassium 8.4mmol) modified-release tablets" |
| 1213  | 3638211000001100   | Potassium chloride/<br>Bendroflumethiazide | "Neo-Naclex-K modified-release tablets (Mercury Pharma Group Ltd)"                                  |
| 2979  | 4955001000027104   | Potassium chloride/<br>Bendroflumethiazide | "Centyl k Tablet (Edwin Burgess Ltd)"                                                               |
| 17561 | 35910011000001105  | Bendroflumethiazide/ Potassium<br>chloride | "Bendroflumethiazide 2.5mg / Potassium chloride 573mg (potassium 7.7mmol) modified-release tablets" |
| 20426 | 4965001000027108   | Bendroflumethiazide/ Potassium<br>chloride | "Centyl k 2.5mg+7.7mmol Tablet (Edwin Burgess Ltd)"                                                 |
| 20431 | 3932711000001105   | Bendroflumethiazide/ Potassium<br>chloride | "Centyl K modified-release tablets (LEO Pharma)"                                                    |
| 2681  | 185595001000027107 |                                            | AMILORIDE 10 MG TAB                                                                                 |
| 3285  | 96205001000027106  |                                            | AMILORIDE S/ F 5 MG/ 5ML SOL                                                                        |
| 3962  | 187005001000027106 |                                            | TRIAMTERENE 50MG HYDROCHLOROTHIAZIDE25MG TAB                                                        |
| 10796 | 188965001000027106 |                                            | CHLORTHALIDONE 25MG/ POTASSIUM6.7MMOL S/ R MG TAB                                                   |
| 15053 | 96925001000027103  |                                            | SPIRONOLACTONE 10 MG/ 5ML LIQ                                                                       |
| 15602 | 167105001000027101 |                                            | NATRILIX 5 MG TAB                                                                                   |
| 17721 | 158125001000027104 |                                            | ALDACTIDE 100 MG TAB                                                                                |
| 19611 |                    |                                            | AMILORIDE 5MG/ HYDROCHLORTHIAZIDE 50MG                                                              |
| 19683 |                    |                                            | BURINEX K                                                                                           |
| 19695 |                    |                                            | AMILORIDE                                                                                           |
| 19721 |                    |                                            | AMILORIDE 5MG/ HYDROCHLORTHIAZIDE 50MG                                                              |
| 20160 | 172315001000027106 |                                            | CHLORTHALIDONE 500 MG TAB                                                                           |
| 20513 | 167925001000027106 |                                            | LASIX 10 MG INJ                                                                                     |
| 20779 |                    |                                            | MODURETIC                                                                                           |
| 21848 | 4605001000027106   |                                            | AMILOSPARE 5 MG TAB                                                                                 |
| 22539 |                    |                                            | LASIX (2ML)                                                                                         |
| 23256 |                    |                                            | LASIX PAED                                                                                          |
| 25630 |                    |                                            | BRINALDIX K EFFERVESCENT                                                                            |
| 26328 |                    |                                            | LASIX (25ML)                                                                                        |

|                           |                    |                                       |                                                                               |
|---------------------------|--------------------|---------------------------------------|-------------------------------------------------------------------------------|
| 26675                     |                    |                                       | XIPAMIDE                                                                      |
| 27555                     |                    |                                       | BURINEX                                                                       |
| 29242                     | 179705001000027102 |                                       | CLOREXOLONE 10 MG TAB                                                         |
| 30368                     | 172785001000027107 |                                       | CHLOROTHIAZIDE/ SPIRONOLACTONE SACHETS 100 MG                                 |
| 41889                     |                    |                                       | TRIAMTERENE 50MG HYDROCHLOROTHIAZIDE25MG                                      |
| 13472                     | 149755001000027102 |                                       | "ESIDREX-K TAB"                                                               |
| 22242                     |                    |                                       | NAVIDREX                                                                      |
| 22525                     | 154075001000027109 |                                       | "CHLOROTHIAZIDE 250 MG SYR"                                                   |
| 23492                     |                    |                                       | "CYCLOPENTHIAZIDE 250MCG/K 8.1MMOL"                                           |
| 26120                     | 154245001000027103 |                                       | "CHLOROTHIAZIDE 50 MG SUS"                                                    |
| 27489                     | 170715001000027104 |                                       | "CHLOROTHIAZIDE 25 MG LIQ"                                                    |
| 31235                     | 154235001000027104 |                                       | "CHLOROTHIAZIDE SACHETS 60 MG"                                                |
| <b>Renin inhibitors</b>   |                    |                                       |                                                                               |
| 36629                     | 425960005          | Aliskiren hemifumarate                | Aliskiren 150mg tablets                                                       |
| 36878                     | 11960911000001108  | Aliskiren hemifumarate                | Rasilez 150mg tablets (Noden Pharma DAC)                                      |
| 36879                     | 11961711000001103  | Aliskiren hemifumarate                | Rasilez 300mg tablets (Noden Pharma DAC)                                      |
| 36909                     | 425669009          | Aliskiren hemifumarate                | Aliskiren 300mg tablets                                                       |
| <b>ORAL BISPSPHONATES</b> |                    |                                       |                                                                               |
| 9208                      | 325979009          | Tiludronate disodium                  | Tiludronic acid 200mg tablets                                                 |
| 9525                      | 4122511000001103   | Tiludronate disodium                  | Skelid 200mg tablets (Sanofi)                                                 |
| 3680                      | 3848211000001108   | Sodium clodronate                     | Loron 400mg capsules (Roche Products Ltd)                                     |
| 4868                      | 325965001          | Sodium clodronate                     | Sodium clodronate 400mg capsules                                              |
| 4927                      | 3847911000001100   | Sodium clodronate                     | Bonefos 400mg capsules (Bayer Plc)                                            |
| 5629                      | 325972000          | Sodium clodronate                     | Sodium clodronate 800mg tablets                                               |
| 6568                      | 325970008          | Sodium clodronate                     | Sodium clodronate 520mg tablets                                               |
| 9189                      | 920611000001107    | Sodium clodronate                     | Bonefos 800mg tablets (Bayer Plc)                                             |
| 11244                     | 3813811000001107   | Sodium clodronate                     | Loron 520mg tablets (Intrapharm Laboratories Ltd)                             |
| 39043                     | 11550411000001104  | Sodium clodronate                     | Clasteon 400mg capsules (Kent Pharmaceuticals Ltd)                            |
| 54989                     | 20540511000001106  | Sodium clodronate                     | Clasteon 800mg tablets (Beacon Pharmaceuticals Ltd)                           |
| 45280                     | 247875001000027107 | Risedronate Sodium/ Calcium Carbonate | Risedronate sodium 35mg & calcium carbonate 1250mg tablet                     |
| 6058                      | 408027002          | Risedronate sodium                    | Risedronate sodium 35mg tablets                                               |
| 6084                      | 215955001000027104 | Risedronate sodium                    | Actonel once a week 35mg Tablet (Procter & Gamble (Health & Beauty Care) Ltd) |
| 6634                      | 325983009          | Risedronate sodium                    | Risedronate sodium 5mg tablets                                                |
| 7089                      | 325984003          | Risedronate sodium                    | Risedronate sodium 30mg tablets                                               |
| 7527                      | 892511000001105    | Risedronate sodium                    | Actonel 5mg tablets (Warner Chilcott UK Ltd)                                  |
| 7546                      | 3778711000001100   | Risedronate sodium                    | Actonel 30mg tablets (Warner Chilcott UK Ltd)                                 |

|       |                   |                               |                                                                          |
|-------|-------------------|-------------------------------|--------------------------------------------------------------------------|
| 44511 | 4028511000001107  | Risedronate sodium            | Actonel Once a Week 35mg tablets (Warner Chilcott UK Ltd)                |
| 48013 | 18448311000001108 | Risedronate sodium            | Risedronate sodium 35mg tablets (A A H Pharmaceuticals Ltd)              |
| 52373 | 18626011000001106 | Risedronate sodium            | Risedronate sodium 35mg tablets (Phoenix Healthcare Distribution Ltd)    |
| 56431 | 18597911000001107 | Risedronate sodium            | Risedronate sodium 35mg tablets (Actavis UK Ltd)                         |
| 56663 | 21887311000001101 | Risedronate sodium            | Risedronate sodium 35mg tablets (Waymade Healthcare Plc)                 |
| 58618 | 16131211000001104 | Risedronate sodium            | Risedronate sodium 35mg/ 5ml oral solution                               |
| 59449 | 19215711000001107 | Risedronate sodium            | Risedronate sodium 35mg tablets (Bluefish Pharmaceuticals AB)            |
| 59916 | 20889411000001109 | Risedronate sodium            | Risedronate sodium 35mg tablets (Sandoz Ltd)                             |
| 60288 | 16255311000001105 | Risedronate sodium            | Actonel Once a Week 35mg tablets (Mawdsley-Brooks & Company Ltd)         |
| 61313 | 18448111000001106 | Risedronate sodium            | Risedronate sodium 30mg tablets (A A H Pharmaceuticals Ltd)              |
| 63802 | 19863711000001101 | Risedronate sodium            | Actonel Once a Week 35mg tablets (Lexon (UK) Ltd)                        |
| 64431 | 18359911000001105 | Risedronate sodium            | Risedronate sodium 30mg tablets (Aspire Pharma Ltd)                      |
| 65971 | 16131311000001107 | Risedronate sodium            | Risedronate sodium 35mg/ 5ml oral suspension                             |
| 66028 | 13211011000001106 | Risedronate sodium            | Actonel 35mg tablets (Teva UK Ltd)                                       |
| 67078 | 18308311000001108 | Risedronate sodium            | Risedronate sodium 35mg tablets (Teva UK Ltd)                            |
| 69630 | 20536311000001101 | Risedronate sodium            | Risedronate sodium 35mg tablets (Almus Pharmaceuticals Ltd)              |
| 69929 | 18344211000001102 | Risedronate sodium            | Risedronate sodium 35mg tablets (Alliance Healthcare (Distribution) Ltd) |
| 69958 | 33614811000001104 | Risedronate sodium            | Risedronate sodium 35mg tablets (Mylan)                                  |
| 71209 | 30879111000001108 | Risedronate sodium            | Risedronate sodium 35mg tablets (Mawdsley-Brooks & Company Ltd)          |
| 73454 | 18359411000001102 | Risedronate sodium            | Risedronate sodium 35mg tablets (Aspire Pharma Ltd)                      |
| 73989 | 13098211000001102 | Risedronate sodium            | Actonel Once a Week 35mg tablets (Dowelhurst Ltd)                        |
| 74805 | 13823311000001109 | Risedronate sodium            | Actonel Once a Week 35mg tablets (DE Pharmaceuticals)                    |
| 76178 |                   | Risedronate sodium            | Actonel 5mg tablets (Sigma Pharmaceuticals Plc)                          |
| 76190 |                   | Risedronate sodium            | Risedronate sodium 5mg tablets (A A H Pharmaceuticals Ltd)               |
| 7112  | 9544911000001107  | Ibandronic sodium monohydrate | Bonviva 150mg tablets (Roche Products Ltd)                               |
| 7146  | 9553111000001105  | Ibandronic sodium monohydrate | Ibandronic acid 150mg tablets                                            |
| 10193 | 410948006         | Ibandronic sodium monohydrate | Ibandronic acid 50mg tablets                                             |
| 26913 | 7540111000001106  | Ibandronic sodium monohydrate | Bondronat 50mg tablets (Roche Products Ltd)                              |
| 47911 | 19371411000001104 | Ibandronic sodium monohydrate | lasibon 50mg tablets (Aspire Pharma Ltd)                                 |
| 51342 | 13837111000001101 | Ibandronic sodium monohydrate | Bonviva 150mg tablets (DE Pharmaceuticals)                               |
| 54453 | 19866411000001102 | Ibandronic sodium monohydrate | Bonviva 150mg tablets (Lexon (UK) Ltd)                                   |
| 56030 | 20641211000001107 | Ibandronic sodium monohydrate | Ibandronic acid 150mg tablets (A A H Pharmaceuticals Ltd)                |
| 56369 | 22086511000001105 | Ibandronic sodium monohydrate | Ibandronic acid 150mg tablets (Zentiva)                                  |
| 57980 | 19295711000001108 | Ibandronic sodium monohydrate | Ibandronic acid 50mg tablets (Actavis UK Ltd)                            |
| 59587 | 23166211000001109 | Ibandronic sodium monohydrate | Ibandronic acid 150mg tablets (Ranbaxy (UK) Ltd)                         |
| 67159 | 20596011000001106 | Ibandronic sodium monohydrate | Ibandronic acid 50mg tablets (Teva UK Ltd)                               |
| 71000 | 20971311000001104 | Ibandronic sodium monohydrate | Ibandronic acid 150mg tablets (Alliance Healthcare (Distribution) Ltd)   |
| 75425 |                   | Ibandronic sodium monohydrate | Ibandronic acid 50mg tablets (DE Pharmaceuticals)                        |
| 75644 |                   | Ibandronic sodium monohydrate | Quodixor 150mg tablets (Aspire Pharma Ltd)                               |
| 76545 |                   | Ibandronic sodium monohydrate | Bonviva 150mg tablets (Mawdsley-Brooks & Company Ltd)                    |
| 77225 |                   | Ibandronic sodium monohydrate | Ibandronic acid 150mg tablets (Teva UK Ltd)                              |
| 78002 |                   | Ibandronic sodium monohydrate | Ibandronic acid 150mg tablets (Mylan)                                    |
| 766   | 3356811000001108  | Etidronate disodium           | Didronel 200mg tablets (Warner Chilcott UK Ltd)                          |

|       |                    |                                                          |                                                                                                             |
|-------|--------------------|----------------------------------------------------------|-------------------------------------------------------------------------------------------------------------|
| 4680  | 325951003          | Etidronate disodium                                      | Etidronate disodium 200mg tablets                                                                           |
| 63371 | 5196211000001102   | Etidronate disodium                                      | Etidronate disodium 200mg tablets (Mylan)                                                                   |
| 77070 |                    | Etidronate disodium                                      | Etidronate disodium 100mg/ 5ml oral suspension                                                              |
| 77996 |                    | Etidronate disodium                                      | Didronel 400mg tablets (Mawdsley-Brooks & Company Ltd)                                                      |
| 53169 | 224555001000027100 | Disodium Etidronate                                      | Etidronate disodium 400mg Tablet                                                                            |
| 54436 | 247235001000027103 | Disodium Etidronate                                      | Etidronate disodium Oral solution                                                                           |
| 37575 | 249915001000027103 | Colecalciferol/ Risedronate Sodium/<br>Calcium Carbonate | Risedronate sodium 35mg with calcium carbonate 2500mg & colecalciferol<br>22micrograms tablets and granules |
| 7224  | 9526611000001107   | Colecalciferol/ Alendronate sodium                       | Alendronic acid 70mg / Colecalciferol 70microgram tablets                                                   |
| 10227 | 9523811000001102   | Colecalciferol/ Alendronate sodium                       | Fosavance tablets (Merck Sharp & Dohme Ltd)                                                                 |
| 66485 | 16182011000001109  | Colecalciferol/ Alendronate sodium                       | Fosavance tablets (Lexon (UK) Ltd)                                                                          |
| 70927 | 34741911000001106  | Colecalciferol/ Alendronate sodium                       | Alendronic acid 70mg / Colecalciferol 70microgram tablets (Creo Pharma Ltd)                                 |
| 76864 |                    | Colecalciferol/ Alendronate sodium                       | Alendronic acid 70mg / Colecalciferol 140microgram tablets                                                  |
| 45787 | 18683211000001101  | Alendronic acid                                          | Alendronic acid 70mg/ 100ml oral solution unit dose sugar free                                              |
| 52564 | 18680211000001106  | Alendronic acid                                          | Alendronic acid 70mg/ 100ml oral solution unit dose sugar free (Rosemont<br>Pharmaceuticals Ltd)            |
| 55295 | 19185711000001106  | Alendronic acid                                          | Alendronic acid 70mg/ 100ml oral solution unit dose sugar free (Alliance Healthcare<br>(Distribution) Ltd)  |
| 55998 | 20920711000001107  | Alendronic acid                                          | Alendronic acid 70mg/ 75ml oral solution unit dose                                                          |
| 60144 | 21755811000001108  | Alendronic acid                                          | Alendronic acid 70mg/ 100ml oral solution unit dose sugar free (Waymade Healthcare<br>Plc)                  |
| 72208 | 20005911000001103  | Alendronic acid                                          | Alendronic acid 70mg/ 100ml oral solution unit dose sugar free (A A H Pharmaceuticals<br>Ltd)               |
| 544   | 417211000001103    | Alendronate sodium                                       | Fosamax Once Weekly 70mg tablets (Merck Sharp & Dohme Ltd)                                                  |
| 663   | 726311000001107    | Alendronate sodium                                       | Fosamax 10mg tablets (Merck Sharp & Dohme Ltd)                                                              |
| 688   | 134599008          | Alendronate sodium                                       | Alendronic acid 70mg tablets                                                                                |
| 782   | 3145911000001101   | Alendronate sodium                                       | Fosamax 5mg tablets (Merck Sharp & Dohme Ltd)                                                               |
| 2298  | 325974004          | Alendronate sodium                                       | Alendronic acid 10mg tablets                                                                                |
| 7530  | 325977006          | Alendronate sodium                                       | Alendronic acid 5mg tablets                                                                                 |
| 35937 | 9221911000001101   | Alendronate sodium                                       | Alendronic acid 70mg tablets (A A H Pharmaceuticals Ltd)                                                    |
| 37217 | 9251711000001102   | Alendronate sodium                                       | Alendronic acid 10mg tablets (Teva UK Ltd)                                                                  |
| 37218 | 9188811000001108   | Alendronate sodium                                       | Alendronic acid 70mg tablets (Teva UK Ltd)                                                                  |
| 40449 | 9836811000001109   | Alendronate sodium                                       | Alendronic acid 70mg tablets (PLIVA Pharma Ltd)                                                             |
| 43958 | 9830711000001104   | Alendronate sodium                                       | Alendronic acid 70mg tablets (Actavis UK Ltd)                                                               |
| 46245 | 9554311000001109   | Alendronate sodium                                       | Alendronic acid 70mg tablets (Mylan)                                                                        |
| 47380 | 10447611000001104  | Alendronate sodium                                       | Alendronic acid 70mg tablets (Arrow Generics Ltd)                                                           |
| 50278 | 13441411000001109  | Alendronate sodium                                       | Alendronic acid 70mg tablets (Wockhardt UK Ltd)                                                             |
| 50880 | 18264111000001108  | Alendronate sodium                                       | Fosamax 10mg tablets (Necessity Supplies Ltd)                                                               |
| 51877 | 9299611000001102   | Alendronate sodium                                       | Alendronic acid 70mg tablets (Alliance Healthcare (Distribution) Ltd)                                       |
| 52284 | 14240211000001101  | Alendronate sodium                                       | Fosamax 10mg tablets (Sigma Pharmaceuticals Plc)                                                            |
| 52624 | 17756411000001101  | Alendronate sodium                                       | Alendronic acid 70mg tablets (Phoenix Healthcare Distribution Ltd)                                          |
| 52834 | 18455911000001100  | Alendronate sodium                                       | Alendronic acid 70mg tablets (Accord Healthcare Ltd)                                                        |
| 54566 | 9252411000001103   | Alendronate sodium                                       | Alendronic acid 10mg tablets (A A H Pharmaceuticals Ltd)                                                    |

|                |                    |                          |                                                                                            |
|----------------|--------------------|--------------------------|--------------------------------------------------------------------------------------------|
| 55965          | 9990311000001102   | Alendronate sodium       | Alendronic acid 70mg tablets (Zentiva)                                                     |
| 56061          | 10435111000001104  | Alendronate sodium       | Alendronic acid 10mg tablets (Actavis UK Ltd)                                              |
| 56260          | 9208911000001102   | Alendronate sodium       | Alendronic acid 70mg tablets (Kent Pharmaceuticals Ltd)                                    |
| 56730          | 17963711000001100  | Alendronate sodium       | Alendronic acid 70mg tablets (Almus Pharmaceuticals Ltd)                                   |
| 57875          | 16181811000001107  | Alendronate sodium       | Fosamax Once Weekly 70mg tablets (Lexon (UK) Ltd)                                          |
| 58744          | 13880811000001102  | Alendronate sodium       | Fosamax Once Weekly 70mg tablets (DE Pharmaceuticals)                                      |
| 59079          | 17961911000001104  | Alendronate sodium       | Alendronic acid 10mg tablets (Almus Pharmaceuticals Ltd)                                   |
| 59247          | 18264311000001105  | Alendronate sodium       | Fosamax Once Weekly 70mg tablets (Necessity Supplies Ltd)                                  |
| 59485          | 18455711000001102  | Alendronate sodium       | Alendronic acid 10mg tablets (Accord Healthcare Ltd)                                       |
| 59555          | 9452511000001100   | Alendronate sodium       | Alendronic acid 10mg tablets (Alliance Healthcare (Distribution) Ltd)                      |
| 61686          | 19701111000001102  | Alendronate sodium       | Alendronic acid 70mg tablets (DE Pharmaceuticals)                                          |
| 63008          | 24111211000001100  | Alendronate sodium       | Alendronic acid 70mg tablets (Somex Pharma)                                                |
| 63175          | 17756211000001100  | Alendronate sodium       | Alendronic acid 10mg tablets (Phoenix Healthcare Distribution Ltd)                         |
| 64331          | 19700911000001106  | Alendronate sodium       | Alendronic acid 10mg tablets (DE Pharmaceuticals)                                          |
| 65008          | 30317811000001101  | Alendronate sodium       | Alendronic acid 70mg effervescent tablets sugar free                                       |
| 65905          | 9554111000001107   | Alendronate sodium       | Alendronic acid 10mg tablets (Mylan)                                                       |
| 66203          | 30316711000001106  | Alendronate sodium       | Binosto 70mg effervescent tablets (Internis Pharmaceuticals Ltd)                           |
| 69995          | 15631411000001101  | Alendronate sodium       | Alendronic acid 35mg/ 5ml oral solution                                                    |
| 71851          | 15060811000001107  | Alendronate sodium       | Alendronic acid 70mg tablets (Sigma Pharmaceuticals Plc)                                   |
| 71963          | 15060411000001105  | Alendronate sodium       | Alendronic acid 10mg tablets (Sigma Pharmaceuticals Plc)                                   |
| 72541          | 15166911000001107  | Alendronate sodium       | Alendronic acid 70mg/ 5ml oral solution                                                    |
| 73560          | 10688611000001108  | Alendronate sodium       | Alendronic acid 10mg tablets (PLIVA Pharma Ltd)                                            |
| 74859          | 5366911000001104   | Alendronate sodium       | Fosamax Once Weekly 70mg tablets (Waymade Healthcare Plc)                                  |
| 75094          | 21756211000001101  | Alendronate sodium       | Alendronic acid 10mg tablets (Waymade Healthcare Plc)                                      |
| 77297          |                    | Alendronate sodium       | Alendronic acid 70mg tablets (Focus Pharmaceuticals Ltd)                                   |
| 110            | 151675001000027109 |                          | DIDRONEL 100 MG TAB                                                                        |
| 468            | 3352411000001105   |                          | Didrone! PMO tablets (Warner Chilcott UK Ltd)                                              |
| 3046           | 81085001000027103  |                          | DISODIUM ETIDRONATE 200 MG TAB                                                             |
| 11368          | 36133111000001109  |                          | Calcium carbonate 1.25g effervescent tablets and Disodium etidronate 400mg tablets         |
| 37833          | 13208811000001109  |                          | Actonel Combi 35mg tablets and 1000mg/ 880unit effervescent granules sachets (Teva UK Ltd) |
| <b>STATINS</b> |                    |                          |                                                                                            |
| 66505          | 32234311000001109  | Simvastatin/ Fenofibrate | Fenofibrate 145mg / Simvastatin 40mg tablets                                               |
| 66780          | 32234211000001101  | Simvastatin/ Fenofibrate | Fenofibrate 145mg / Simvastatin 20mg tablets                                               |
| 69528          | 32170911000001100  | Simvastatin/ Fenofibrate | Cholib 145mg/ 20mg tablets (Mylan)                                                         |
| 70486          | 32169911000001103  | Simvastatin/ Fenofibrate | Cholib 145mg/ 40mg tablets (Mylan)                                                         |
| 7552           | 414177002          | Simvastatin/ Ezetimibe   | Simvastatin 20mg / Ezetimibe 10mg tablets                                                  |
| 10172          | 414178007          | Simvastatin/ Ezetimibe   | Simvastatin 40mg / Ezetimibe 10mg tablets                                                  |
| 10183          | 240715001000027105 | Simvastatin/ Ezetimibe   | Simvastatin 40mg with ezetimibe 10mg tablet                                                |
| 10206          | 240725001000027101 | Simvastatin/ Ezetimibe   | Simvastatin 80mg with ezetimibe 10mg tablet                                                |
| 11815          | 240705001000027108 | Simvastatin/ Ezetimibe   | Simvastatin 20mg with ezetimibe 10mg tablet                                                |
| 14219          | 414179004          | Simvastatin/ Ezetimibe   | Simvastatin 80mg / Ezetimibe 10mg tablets                                                  |

|       |                    |                        |                                                                        |
|-------|--------------------|------------------------|------------------------------------------------------------------------|
| 16186 | 9310611000001103   | Simvastatin/ Ezetimibe | Inegy 10mg/ 80mg tablets (Merck Sharp & Dohme Ltd)                     |
| 17059 | 9310311000001108   | Simvastatin/ Ezetimibe | Inegy 10mg/ 40mg tablets (Merck Sharp & Dohme Ltd)                     |
| 21020 | 9309911000001100   | Simvastatin/ Ezetimibe | Inegy 10mg/ 20mg tablets (Merck Sharp & Dohme Ltd)                     |
| 25    | 319997009          | Simvastatin            | Simvastatin 20mg tablets                                               |
| 42    | 319996000          | Simvastatin            | Simvastatin 10mg tablets                                               |
| 51    | 320000009          | Simvastatin            | Simvastatin 40mg tablets                                               |
| 802   | 4896711000001108   | Simvastatin            | Simvador 40mg tablets (Discovery Pharmaceuticals)                      |
| 818   | 242705001000027101 | Simvastatin            | Simvastatin 20mg/ 5ml oral solution sugar free                         |
| 2718  | 108111000001106    | Simvastatin            | Zocor 10mg tablets (Merck Sharp & Dohme Ltd)                           |
| 5148  | 320006003          | Simvastatin            | Simvastatin 80mg tablets                                               |
| 6168  | 859611000001107    | Simvastatin            | Zocor 40mg tablets (Merck Sharp & Dohme Ltd)                           |
| 7196  | 776811000001104    | Simvastatin            | Zocor 20mg tablets (Merck Sharp & Dohme Ltd)                           |
| 9920  | 4896511000001103   | Simvastatin            | Simvador 20mg tablets (Discovery Pharmaceuticals)                      |
| 13041 | 4896211000001101   | Simvastatin            | Simvador 10mg tablets (Discovery Pharmaceuticals)                      |
| 22579 | 113211000001106    | Simvastatin            | Zocor 80mg tablets (Merck Sharp & Dohme Ltd)                           |
| 31930 | 238335001000027101 | Simvastatin            | Zocor heart-pro 10mg Tablet (McNeil Products Ltd)                      |
| 32909 | 4579211000001101   | Simvastatin            | Simvastatin 80mg tablets (A A H Pharmaceuticals Ltd)                   |
| 33082 | 4578811000001107   | Simvastatin            | Simvastatin 20mg tablets (A A H Pharmaceuticals Ltd)                   |
| 34312 | 4464011000001108   | Simvastatin            | Simvastatin 20mg tablets (Mylan)                                       |
| 34316 | 4380911000001108   | Simvastatin            | Simvastatin 20mg tablets (Teva UK Ltd)                                 |
| 34353 | 4464211000001103   | Simvastatin            | Simvastatin 40mg tablets (Mylan)                                       |
| 34366 | 4466511000001106   | Simvastatin            | Simvastatin 20mg tablets (IVAX Pharmaceuticals UK Ltd)                 |
| 34376 | 4381111000001104   | Simvastatin            | Simvastatin 40mg tablets (Teva UK Ltd)                                 |
| 34381 | 4466711000001101   | Simvastatin            | Simvastatin 40mg tablets (IVAX Pharmaceuticals UK Ltd)                 |
| 34476 | 134095001000027108 | Simvastatin            | Simvastatin 20mg Tablet (Ratiopharm UK Ltd)                            |
| 34481 | 4466211000001108   | Simvastatin            | Simvastatin 10mg tablets (IVAX Pharmaceuticals UK Ltd)                 |
| 34502 | 4579011000001106   | Simvastatin            | Simvastatin 40mg tablets (A A H Pharmaceuticals Ltd)                   |
| 34535 | 4463811000001100   | Simvastatin            | Simvastatin 10mg tablets (Mylan)                                       |
| 34545 | 134145001000027108 | Simvastatin            | Simvastatin 40mg Tablet (Ratiopharm UK Ltd)                            |
| 34560 | 134055001000027102 | Simvastatin            | Simvastatin 10mg Tablet (Ratiopharm UK Ltd)                            |
| 34746 | 136355001000027109 | Simvastatin            | Simvastatin 20mg Tablet (Niche Generics Ltd)                           |
| 34814 | 4480511000001107   | Simvastatin            | Simvastatin 20mg tablets (Wockhardt UK Ltd)                            |
| 34879 | 136385001000027102 | Simvastatin            | Simvastatin 40mg Tablet (Niche Generics Ltd)                           |
| 34891 | 4467111000001104   | Simvastatin            | Simvastatin 20mg tablets (Kent Pharmaceuticals Ltd)                    |
| 34907 | 4480711000001102   | Simvastatin            | Simvastatin 40mg tablets (Wockhardt UK Ltd)                            |
| 34955 | 4578011000001101   | Simvastatin            | Simvastatin 10mg tablets (A A H Pharmaceuticals Ltd)                   |
| 34969 | 4437211000001100   | Simvastatin            | Simvastatin 40mg tablets (Actavis UK Ltd)                              |
| 37434 | 4580311000001109   | Simvastatin            | Simvastatin 40mg tablets (Sandoz Ltd)                                  |
| 39060 | 11551511000001107  | Simvastatin            | Simvastatin 20mg tablets (Dexcel-Pharma Ltd)                           |
| 39652 | 256505001000027107 | Simvastatin            | Simvastatin 40mg/ 5ml oral solution sugar free                         |
| 39675 | 183305001000027103 | Simvastatin            | Simvastatin 20mg/ 5ml Oral suspension (Martindale Pharmaceuticals Ltd) |
| 39870 | 15158611000001106  | Simvastatin            | Simvador 80mg tablets (Discovery Pharmaceuticals)                      |
| 40340 | 4380611000001102   | Simvastatin            | Simvastatin 10mg tablets (Teva UK Ltd)                                 |

|       |                   |             |                                                                                 |
|-------|-------------------|-------------|---------------------------------------------------------------------------------|
| 40601 | 4465311000001105  | Simvastatin | Simvastatin 20mg tablets (Ranbaxy (UK) Ltd)                                     |
| 41657 | 5476111000001102  | Simvastatin | Simvastatin 80mg tablets (Teva UK Ltd)                                          |
| 44528 | 17305411000001100 | Simvastatin | Simvastatin 20mg/ 5ml oral suspension sugar free (Rosemont Pharmaceuticals Ltd) |
| 44650 | 11551711000001102 | Simvastatin | Simvastatin 40mg tablets (Dexcel-Pharma Ltd)                                    |
| 44878 | 7630211000001106  | Simvastatin | Ranzolont 10mg tablets (Ranbaxy (UK) Ltd)                                       |
| 45219 | 4467311000001102  | Simvastatin | Simvastatin 40mg tablets (Kent Pharmaceuticals Ltd)                             |
| 45235 | 4580111000001107  | Simvastatin | Simvastatin 20mg tablets (Sandoz Ltd)                                           |
| 45245 | 4437011000001105  | Simvastatin | Simvastatin 20mg tablets (Actavis UK Ltd)                                       |
| 45346 | 10414211000001101 | Simvastatin | Simvastatin 40mg tablets (Arrow Generics Ltd)                                   |
| 46878 | 9804311000001100  | Simvastatin | Simvastatin 40mg tablets (Almus Pharmaceuticals Ltd)                            |
| 46956 | 10414411000001102 | Simvastatin | Simvastatin 80mg tablets (Arrow Generics Ltd)                                   |
| 47774 | 10413811000001103 | Simvastatin | Simvastatin 10mg tablets (Arrow Generics Ltd)                                   |
| 47948 | 13762911000001107 | Simvastatin | Simvastatin 10mg tablets (Tillomed Laboratories Ltd)                            |
| 48018 | 10414011000001106 | Simvastatin | Simvastatin 20mg tablets (Arrow Generics Ltd)                                   |
| 48051 | 4466911000001104  | Simvastatin | Simvastatin 10mg tablets (Kent Pharmaceuticals Ltd)                             |
| 48058 | 4465011000001107  | Simvastatin | Simvastatin 10mg tablets (Ranbaxy (UK) Ltd)                                     |
| 48078 | 4436811000001101  | Simvastatin | Simvastatin 10mg tablets (Actavis UK Ltd)                                       |
| 48221 | 17369311000001105 | Simvastatin | Simvastatin 20mg/ 5ml oral suspension sugar free                                |
| 48431 | 17429811000001102 | Simvastatin | Simvastatin 40mg/ 5ml oral suspension sugar free                                |
| 48867 | 4574811000001104  | Simvastatin | Simvastatin 40mg tablets (Alliance Healthcare (Distribution) Ltd)               |
| 49061 | 16067211000001108 | Simvastatin | Simvastatin 40mg tablets (Bristol Laboratories Ltd)                             |
| 49062 | 4574611000001103  | Simvastatin | Simvastatin 20mg tablets (Alliance Healthcare (Distribution) Ltd)               |
| 49587 | 9804011000001103  | Simvastatin | Simvastatin 80mg tablets (Almus Pharmaceuticals Ltd)                            |
| 50483 | 10297511000001106 | Simvastatin | Simvastatin 40mg tablets (Relonchem Ltd)                                        |
| 50564 | 10297311000001100 | Simvastatin | Simvastatin 20mg tablets (Relonchem Ltd)                                        |
| 50670 | 19197811000001107 | Simvastatin | Simvastatin 40mg tablets (Milpharm Ltd)                                         |
| 50703 | 18468511000001107 | Simvastatin | Simvastatin 40mg tablets (Accord Healthcare Ltd)                                |
| 50754 | 19733411000001104 | Simvastatin | Simvastatin 20mg tablets (Medreich Plc)                                         |
| 50882 | 10618911000001100 | Simvastatin | Simvastatin 40mg tablets (Somex Pharma)                                         |
| 51085 | 19733211000001103 | Simvastatin | Simvastatin 10mg tablets (Medreich Plc)                                         |
| 51166 | 19733611000001101 | Simvastatin | Simvastatin 40mg tablets (Medreich Plc)                                         |
| 51233 | 4574411000001101  | Simvastatin | Simvastatin 10mg tablets (Alliance Healthcare (Distribution) Ltd)               |
| 51483 | 19197611000001108 | Simvastatin | Simvastatin 20mg tablets (Milpharm Ltd)                                         |
| 51715 | 15188311000001107 | Simvastatin | Simvastatin 10mg tablets (Sigma Pharmaceuticals Plc)                            |
| 52098 | 4465611000001100  | Simvastatin | Simvastatin 40mg tablets (Ranbaxy (UK) Ltd)                                     |
| 52257 | 18468011000001104 | Simvastatin | Simvastatin 20mg tablets (Accord Healthcare Ltd)                                |
| 52625 | 4480311000001101  | Simvastatin | Simvastatin 10mg tablets (Wockhardt UK Ltd)                                     |
| 52676 | 8722011000001100  | Simvastatin | Simvastatin 10mg/ 5ml oral suspension                                           |
| 52812 | 15171911000001107 | Simvastatin | Simvastatin 20mg tablets (Sigma Pharmaceuticals Plc)                            |
| 52953 | 16066911000001102 | Simvastatin | Simvastatin 20mg tablets (Bristol Laboratories Ltd)                             |
| 52962 | 19733811000001102 | Simvastatin | Simvastatin 80mg tablets (Medreich Plc)                                         |
| 53087 | 10618711000001102 | Simvastatin | Simvastatin 20mg tablets (Somex Pharma)                                         |
| 53340 | 16451611000001102 | Simvastatin | Zocor 40mg tablets (Lexon (UK) Ltd)                                             |

|       |                   |             |                                                                                           |
|-------|-------------------|-------------|-------------------------------------------------------------------------------------------|
| 53415 | 19197411000001105 | Simvastatin | Simvastatin 10mg tablets (Milpharm Ltd)                                                   |
| 53676 | 13763111000001103 | Simvastatin | Simvastatin 20mg tablets (Tillomed Laboratories Ltd)                                      |
| 53822 | 16066711000001104 | Simvastatin | Simvastatin 10mg tablets (Bristol Laboratories Ltd)                                       |
| 53908 | 11551311000001101 | Simvastatin | Simvastatin 10mg tablets (Dexcel-Pharma Ltd)                                              |
| 53966 | 17793911000001109 | Simvastatin | Simvastatin 40mg tablets (Phoenix Healthcare Distribution Ltd)                            |
| 54240 | 15172411000001109 | Simvastatin | Simvastatin 40mg tablets (Sigma Pharmaceuticals Plc)                                      |
| 54266 | 8722111000001104  | Simvastatin | Simvastatin 20mg/ 5ml oral suspension                                                     |
| 54493 | 10296911000001102 | Simvastatin | Simvastatin 10mg tablets (Relonchem Ltd)                                                  |
| 54606 | 18757511000001106 | Simvastatin | Simvastatin 20mg/ 5ml oral suspension sugar free (A A H Pharmaceuticals Ltd)              |
| 54655 | 18467811000001106 | Simvastatin | Simvastatin 10mg tablets (Accord Healthcare Ltd)                                          |
| 54819 | 17305711000001106 | Simvastatin | Simvastatin 40mg/ 5ml oral suspension sugar free (Rosemont Pharmaceuticals Ltd)           |
| 54947 | 9804811000001109  | Simvastatin | Simvastatin 20mg tablets (Almus Pharmaceuticals Ltd)                                      |
| 54976 | 10618511000001107 | Simvastatin | Simvastatin 10mg tablets (Somex Pharma)                                                   |
| 54985 | 13894411000001106 | Simvastatin | Simvastatin 40mg/ 5ml oral suspension                                                     |
| 55452 | 17785511000001104 | Simvastatin | Simvastatin 20mg tablets (Phoenix Healthcare Distribution Ltd)                            |
| 56065 | 21898011000001102 | Simvastatin | Simvastatin 20mg/ 5ml oral suspension sugar free (Waymade Healthcare Plc)                 |
| 56481 | 14732411000001109 | Simvastatin | Zocor 10mg tablets (Sigma Pharmaceuticals Plc)                                            |
| 56494 | 14732811000001106 | Simvastatin | Zocor 20mg tablets (Sigma Pharmaceuticals Plc)                                            |
| 57329 | 16091011000001105 | Simvastatin | Simvastatin 25mg/ 5ml oral suspension                                                     |
| 57568 | 16451411000001100 | Simvastatin | Zocor 10mg tablets (Lexon (UK) Ltd)                                                       |
| 58315 | 21899311000001105 | Simvastatin | Simvastatin 20mg tablets (Waymade Healthcare Plc)                                         |
| 58755 | 17928611000001107 | Simvastatin | Simvastatin 10mg tablets (Phoenix Healthcare Distribution Ltd)                            |
| 61155 | 18758211000001107 | Simvastatin | Simvastatin 40mg/ 5ml oral suspension sugar free (A A H Pharmaceuticals Ltd)              |
| 61321 | 4579911000001105  | Simvastatin | Simvastatin 10mg tablets (Sandoz Ltd)                                                     |
| 61360 | 9805011000001104  | Simvastatin | Simvastatin 10mg tablets (Almus Pharmaceuticals Ltd)                                      |
| 61665 | 21899011000001107 | Simvastatin | Simvastatin 10mg tablets (Waymade Healthcare Plc)                                         |
| 62137 | 21899611000001100 | Simvastatin | Simvastatin 40mg tablets (Waymade Healthcare Plc)                                         |
| 64104 | 28988511000001107 | Simvastatin | Simvastatin 20mg tablets (Crescent Pharma Ltd)                                            |
| 64180 | 28918311000001104 | Simvastatin | Simvastatin 10mg tablets (Crescent Pharma Ltd)                                            |
| 64307 | 28918111000001101 | Simvastatin | Simvastatin 40mg tablets (Crescent Pharma Ltd)                                            |
| 64968 | 30097311000001108 | Simvastatin | Simvastatin 10mg tablets (DE Pharmaceuticals)                                             |
| 65181 | 30097711000001107 | Simvastatin | Simvastatin 40mg tablets (DE Pharmaceuticals)                                             |
| 65679 | 30097511000001102 | Simvastatin | Simvastatin 20mg tablets (DE Pharmaceuticals)                                             |
| 65901 | 10733711000001109 | Simvastatin | Simvastatin 40mg tablets (Zentiva)                                                        |
| 65925 | 17841911000001100 | Simvastatin | Simvastatin 20mg/ 5ml oral suspension sugar free (Alliance Healthcare (Distribution) Ltd) |
| 67098 | 32494611000001109 | Simvastatin | Simvastatin 10mg tablets (Brown & Burk UK Ltd)                                            |
| 67745 | 10733011000001107 | Simvastatin | Simvastatin 10mg tablets (Zentiva)                                                        |
| 67773 | 10733511000001104 | Simvastatin | Simvastatin 20mg tablets (Zentiva)                                                        |
| 68563 | 32495011000001103 | Simvastatin | Simvastatin 40mg tablets (Brown & Burk UK Ltd)                                            |
| 68686 | 33555611000001103 | Simvastatin | Simvastatin 20mg tablets (Genesis Pharmaceuticals Ltd)                                    |
| 69413 | 32494811000001108 | Simvastatin | Simvastatin 20mg tablets (Brown & Burk UK Ltd)                                            |
| 71773 | 32495311000001100 | Simvastatin | Simvastatin 80mg tablets (Brown & Burk UK Ltd)                                            |
| 72050 | 33654911000001100 | Simvastatin | Simvastatin 10mg tablets (Genesis Pharmaceuticals Ltd)                                    |



|       |                    |                      |                                                                  |
|-------|--------------------|----------------------|------------------------------------------------------------------|
| 75134 | 4464511000001100   | Simvastatin          | Simvastatin 80mg tablets (Mylan)                                 |
| 76481 |                    | Simvastatin          | Simvastatin 80mg Tablet (Dexcel-Pharma Ltd)                      |
| 76594 |                    | Simvastatin          | Simvastatin 40mg tablets (Tillomed Laboratories Ltd)             |
| 77357 |                    | Simvastatin          | Zocor 20mg tablets (Waymade Healthcare Plc)                      |
| 77358 |                    | Simvastatin          | Zocor 10mg tablets (Waymade Healthcare Plc)                      |
| 77470 |                    | Simvastatin          | Zocor 10mg tablets (Necessity Supplies Ltd)                      |
| 77471 |                    | Simvastatin          | Zocor 20mg tablets (Necessity Supplies Ltd)                      |
| 713   | 408036003          | Rosuvastatin calcium | Rosuvastatin 10mg tablets                                        |
| 6213  | 408037007          | Rosuvastatin calcium | Rosuvastatin 20mg tablets                                        |
| 7347  | 4171011000001104   | Rosuvastatin calcium | Crestor 10mg tablets (AstraZeneca UK Ltd)                        |
| 7554  | 409108001          | Rosuvastatin calcium | Rosuvastatin 5mg tablets                                         |
| 9897  | 408024009          | Rosuvastatin calcium | Rosuvastatin 40mg tablets                                        |
| 9930  | 4172111000001108   | Rosuvastatin calcium | Crestor 40mg tablets (AstraZeneca UK Ltd)                        |
| 15252 | 4171311000001101   | Rosuvastatin calcium | Crestor 20mg tablets (AstraZeneca UK Ltd)                        |
| 17688 | 9747511000001107   | Rosuvastatin calcium | Crestor 5mg tablets (AstraZeneca UK Ltd)                         |
| 53460 | 13857911000001102  | Rosuvastatin calcium | Crestor 10mg tablets (DE Pharmaceuticals)                        |
| 57763 | 10769311000001104  | Rosuvastatin calcium | Rosuvastatin 10mg tablets (Waymade Healthcare Plc)               |
| 57999 | 16155011000001105  | Rosuvastatin calcium | Crestor 40mg tablets (Lexon (UK) Ltd)                            |
| 58617 | 16075311000001101  | Rosuvastatin calcium | Rosuvastatin 20mg/ 5ml oral suspension                           |
| 59447 | 10513311000001102  | Rosuvastatin calcium | Crestor 20mg tablets (Waymade Healthcare Plc)                    |
| 59452 | 12561111000001105  | Rosuvastatin calcium | Rosuvastatin 5mg tablets (Waymade Healthcare Plc)                |
| 60160 | 18202311000001102  | Rosuvastatin calcium | Rosuvastatin 5mg tablets (Mawdsley-Brooks & Company Ltd)         |
| 70308 | 14212311000001103  | Rosuvastatin calcium | Crestor 20mg tablets (Sigma Pharmaceuticals Plc)                 |
| 71014 | 11580111000001101  | Rosuvastatin calcium | Rosuvastatin 20mg tablets (Waymade Healthcare Plc)               |
| 73025 | 35027811000001104  | Rosuvastatin calcium | Rosuvastatin 20mg tablets (Mylan)                                |
| 74552 | 35183311000001102  | Rosuvastatin calcium | Rosuvastatin 10mg tablets (Milpharm Ltd)                         |
| 75971 |                    | Rosuvastatin calcium | Rosuvastatin 10mg tablets (Sandoz Ltd)                           |
| 76120 |                    | Rosuvastatin calcium | Rosuvastatin 10mg tablets (Teva UK Ltd)                          |
| 490   | 320012008          | Pravastatin sodium   | Pravastatin 10mg tablets                                         |
| 730   | 320013003          | Pravastatin sodium   | Pravastatin 20mg tablets                                         |
| 1219  | 320014009          | Pravastatin sodium   | Pravastatin 40mg tablets                                         |
| 1221  | 802411000001108    | Pravastatin sodium   | Lipostat 10mg tablets (Bristol-Myers Squibb Pharmaceuticals Ltd) |
| 1223  | 535011000001102    | Pravastatin sodium   | Lipostat 40mg tablets (Bristol-Myers Squibb Pharmaceuticals Ltd) |
| 3690  | 454111000001107    | Pravastatin sodium   | Lipostat 20mg tablets (Bristol-Myers Squibb Pharmaceuticals Ltd) |
| 32921 | 163075001000027105 | Pravastatin sodium   | Pravastatin 10mg Tablet (Dr Reddy's Laboratories (UK) Ltd)       |
| 34820 | 7977111000001100   | Pravastatin sodium   | Pravastatin 40mg tablets (A A H Pharmaceuticals Ltd)             |
| 36377 | 7943411000001102   | Pravastatin sodium   | Pravastatin 20mg tablets (Teva UK Ltd)                           |
| 40382 | 7976911000001100   | Pravastatin sodium   | Pravastatin 20mg tablets (A A H Pharmaceuticals Ltd)             |
| 43218 | 7943211000001101   | Pravastatin sodium   | Pravastatin 10mg tablets (Teva UK Ltd)                           |
| 47988 | 8113311000001107   | Pravastatin sodium   | Pravastatin 40mg tablets (Mylan)                                 |
| 48097 | 7943611000001104   | Pravastatin sodium   | Pravastatin 40mg tablets (Teva UK Ltd)                           |
| 50925 | 15174911000001105  | Pravastatin sodium   | Pravastatin 10mg tablets (Sigma Pharmaceuticals Plc)             |
| 51676 | 19732111000001103  | Pravastatin sodium   | Pravastatin 40mg tablets (Medreich Plc)                          |

|       |                   |                    |                                                                    |
|-------|-------------------|--------------------|--------------------------------------------------------------------|
| 51890 | 19731911000001106 | Pravastatin sodium | Pravastatin 20mg tablets (Medreich Plc)                            |
| 52755 | 8027311000001103  | Pravastatin sodium | Pravastatin 20mg tablets (Alliance Healthcare (Distribution) Ltd)  |
| 54435 | 9807511000001103  | Pravastatin sodium | Pravastatin 40mg tablets (Almus Pharmaceuticals Ltd)               |
| 54607 | 9806911000001107  | Pravastatin sodium | Pravastatin 20mg tablets (Almus Pharmaceuticals Ltd)               |
| 55912 | 8027611000001108  | Pravastatin sodium | Pravastatin 40mg tablets (Alliance Healthcare (Distribution) Ltd)  |
| 56146 | 21850611000001104 | Pravastatin sodium | Pravastatin 10mg tablets (Waymade Healthcare Plc)                  |
| 56607 | 21850811000001100 | Pravastatin sodium | Pravastatin 20mg tablets (Waymade Healthcare Plc)                  |
| 56735 | 8113111000001105  | Pravastatin sodium | Pravastatin 20mg tablets (Mylan)                                   |
| 56893 | 18465611000001100 | Pravastatin sodium | Pravastatin 40mg tablets (Accord Healthcare Ltd)                   |
| 56916 | 11410811000001100 | Pravastatin sodium | Pravastatin 40mg tablets (PLIVA Pharma Ltd)                        |
| 57108 | 21851011000001102 | Pravastatin sodium | Pravastatin 40mg tablets (Waymade Healthcare Plc)                  |
| 57137 | 9806311000001106  | Pravastatin sodium | Pravastatin 10mg tablets (Almus Pharmaceuticals Ltd)               |
| 57296 | 17915711000001103 | Pravastatin sodium | Pravastatin 20mg tablets (Phoenix Healthcare Distribution Ltd)     |
| 57397 | 18465211000001102 | Pravastatin sodium | Pravastatin 10mg tablets (Accord Healthcare Ltd)                   |
| 59508 | 18465411000001103 | Pravastatin sodium | Pravastatin 20mg tablets (Accord Healthcare Ltd)                   |
| 60251 | 7997711000001109  | Pravastatin sodium | Pravastatin 10mg tablets (Sandoz Ltd)                              |
| 61134 | 15175111000001106 | Pravastatin sodium | Pravastatin 20mg tablets (Sigma Pharmaceuticals Plc)               |
| 62979 | 8099711000001100  | Pravastatin sodium | Pravastatin 40mg tablets (Kent Pharmaceuticals Ltd)                |
| 63074 | 11410611000001104 | Pravastatin sodium | Pravastatin 20mg tablets (PLIVA Pharma Ltd)                        |
| 63787 | 13761111000001104 | Pravastatin sodium | Pravastatin 10mg tablets (Tillomed Laboratories Ltd)               |
| 67829 | 7998011000001108  | Pravastatin sodium | Pravastatin 20mg tablets (Sandoz Ltd)                              |
| 68156 | 7976411000001108  | Pravastatin sodium | Pravastatin 10mg tablets (A A H Pharmaceuticals Ltd)               |
| 71015 | 19731611000001100 | Pravastatin sodium | Pravastatin 10mg tablets (Medreich Plc)                            |
| 72048 | 7959111000001108  | Pravastatin sodium | Pravastatin 40mg tablets (Actavis UK Ltd)                          |
| 72149 | 14957811000001102 | Pravastatin sodium | Pravastatin 5mg/ 5ml oral suspension                               |
| 75826 |                   | Pravastatin sodium | Pravastatin 20mg tablets (Actavis UK Ltd)                          |
| 77394 |                   | Pravastatin sodium | Lipostat 20mg tablets (Dowelhurst Ltd)                             |
| 379   | 320022002         | Fluvastatin sodium | Fluvastatin 20mg capsules                                          |
| 2137  | 320023007         | Fluvastatin sodium | Fluvastatin 40mg capsules                                          |
| 5985  | 378111000001106   | Fluvastatin sodium | Lescol XL 80mg tablets (Novartis Pharmaceuticals UK Ltd)           |
| 8380  | 84811000001104    | Fluvastatin sodium | Lescol 20mg capsules (Novartis Pharmaceuticals UK Ltd)             |
| 9153  | 409611000001108   | Fluvastatin sodium | Lescol 40mg capsules (Novartis Pharmaceuticals UK Ltd)             |
| 11627 | 36566411000001105 | Fluvastatin sodium | Fluvastatin 80mg modified-release tablets                          |
| 53770 | 14584511000001106 | Fluvastatin sodium | Fluvastatin 40mg capsules (A A H Pharmaceuticals Ltd)              |
| 59278 | 14036511000001107 | Fluvastatin sodium | Fluvastatin 20mg capsules (Zentiva)                                |
| 62148 | 16237911000001102 | Fluvastatin sodium | Fluvastatin 20mg capsules (Actavis UK Ltd)                         |
| 67328 | 16499511000001107 | Fluvastatin sodium | Lescol XL 80mg tablets (Mawdsley-Brooks & Company Ltd)             |
| 71029 | 20289511000001104 | Fluvastatin sodium | Fluvastatin 40mg capsules (Sandoz Ltd)                             |
| 72308 | 14037111000001100 | Fluvastatin sodium | Fluvastatin 20mg capsules (Alliance Healthcare (Distribution) Ltd) |
| 73383 | 16238111000001104 | Fluvastatin sodium | Fluvastatin 40mg capsules (Actavis UK Ltd)                         |
| 74085 | 14765111000001100 | Fluvastatin sodium | Lescol 40mg capsules (Sigma Pharmaceuticals Plc)                   |
| 77306 |                   | Fluvastatin sodium | Nandovar XL 80mg tablets (Sandoz Ltd)                              |
| 77425 |                   | Fluvastatin sodium | Lescol 20mg capsules (Sigma Pharmaceuticals Plc)                   |

|       |                    |                                 |                                                                    |
|-------|--------------------|---------------------------------|--------------------------------------------------------------------|
| 77472 |                    | Fluvastatin sodium              | Lescol 40mg capsules (Lexon (UK) Ltd)                              |
| 420   | 320035006          | Cerivastatin sodium             | Cerivastatin 100microgram tablets                                  |
| 4961  | 226245001000027101 | Cerivastatin sodium             | Lipobay 300microgram Tablet (Bayer Plc)                            |
| 5009  | 320036007          | Cerivastatin sodium             | Cerivastatin 200microgram tablets                                  |
| 5251  | 320037003          | Cerivastatin sodium             | Cerivastatin 300microgram tablets                                  |
| 5278  | 320041004          | Cerivastatin sodium             | Cerivastatin 400microgram tablets                                  |
| 9315  | 226225001000027104 | Cerivastatin sodium             | Lipobay 100microgram Tablet (Bayer Plc)                            |
| 9316  | 226235001000027102 | Cerivastatin sodium             | Lipobay 200microgram Tablet (Bayer Plc)                            |
| 18442 | 201215001000027108 | Cerivastatin sodium             | Lipobay 400microgram Tablet (Bayer Plc)                            |
| 31658 | 134491009          | Cerivastatin sodium             | Cerivastatin 800microgram tablets                                  |
| 53813 | 4535911000001106   | Cerivastatin sodium             | Lipobay 100microgram tablets (Bayer Plc)                           |
| 55207 | 4537511000001108   | Cerivastatin sodium             | Lipobay 200microgram tablets (Bayer Plc)                           |
| 58480 | 4566311000001105   | Cerivastatin sodium             | Lipobay 300microgram tablets (Bayer Plc)                           |
| 62132 | 4538111000001103   | Cerivastatin sodium             | Lipobay 400microgram tablets (Bayer Plc)                           |
| 28    | 320029006          | Atorvastatin calcium trihydrate | Atorvastatin 10mg tablets                                          |
| 75    | 320030001          | Atorvastatin calcium trihydrate | Atorvastatin 20mg tablets                                          |
| 745   | 320031002          | Atorvastatin calcium trihydrate | Atorvastatin 40mg tablets                                          |
| 2955  | 484211000001108    | Atorvastatin calcium trihydrate | Lipitor 40mg tablets (Pfizer Ltd)                                  |
| 3411  | 643911000001108    | Atorvastatin calcium trihydrate | Lipitor 10mg tablets (Pfizer Ltd)                                  |
| 5775  | 134489001          | Atorvastatin calcium trihydrate | Atorvastatin 80mg tablets                                          |
| 7374  | 232011000001102    | Atorvastatin calcium trihydrate | Lipitor 20mg tablets (Pfizer Ltd)                                  |
| 17683 | 756111000001109    | Atorvastatin calcium trihydrate | Lipitor 80mg tablets (Pfizer Ltd)                                  |
| 47065 | 19722511000001105  | Atorvastatin calcium trihydrate | Atorvastatin 20mg chewable tablets sugar free                      |
| 47090 | 19722411000001106  | Atorvastatin calcium trihydrate | Atorvastatin 10mg chewable tablets sugar free                      |
| 47630 | 19719611000001109  | Atorvastatin calcium trihydrate | Lipitor 20mg chewable tablets (Pfizer Ltd)                         |
| 47721 | 19719311000001104  | Atorvastatin calcium trihydrate | Lipitor 10mg chewable tablets (Pfizer Ltd)                         |
| 48346 | 20528611000001105  | Atorvastatin calcium trihydrate | Atorvastatin 60mg tablets                                          |
| 48518 | 14158611000001100  | Atorvastatin calcium trihydrate | Atorvastatin 10mg/ 5ml oral solution                               |
| 48973 | 20528511000001106  | Atorvastatin calcium trihydrate | Atorvastatin 30mg tablets                                          |
| 49558 | 20491911000001107  | Atorvastatin calcium trihydrate | Atorvastatin 20mg tablets (A A H Pharmaceuticals Ltd)              |
| 49751 | 20508311000001106  | Atorvastatin calcium trihydrate | Atorvastatin 40mg tablets (Alliance Healthcare (Distribution) Ltd) |
| 50236 | 20576911000001102  | Atorvastatin calcium trihydrate | Atorvastatin 10mg tablets (Zentiva)                                |
| 50272 | 20978811000001102  | Atorvastatin calcium trihydrate | Atorvastatin 40mg tablets (Pfizer Ltd)                             |
| 50788 | 20978111000001109  | Atorvastatin calcium trihydrate | Atorvastatin 20mg tablets (Pfizer Ltd)                             |
| 50790 | 20448411000001102  | Atorvastatin calcium trihydrate | Atorvastatin 20mg tablets (Dexcel-Pharma Ltd)                      |
| 50963 | 20494711000001108  | Atorvastatin calcium trihydrate | Atorvastatin 40mg tablets (Teva UK Ltd)                            |
| 51134 | 20491711000001105  | Atorvastatin calcium trihydrate | Atorvastatin 10mg tablets (A A H Pharmaceuticals Ltd)              |
| 51200 | 20570211000001109  | Atorvastatin calcium trihydrate | Atorvastatin 40mg tablets (Arrow Generics Ltd)                     |
| 51359 | 20569511000001105  | Atorvastatin calcium trihydrate | Atorvastatin 20mg tablets (Arrow Generics Ltd)                     |
| 51622 | 20529611000001101  | Atorvastatin calcium trihydrate | Atorvastatin 20mg tablets (Consilient Health Ltd)                  |
| 51876 | 20529811000001102  | Atorvastatin calcium trihydrate | Atorvastatin 40mg tablets (Consilient Health Ltd)                  |
| 52097 | 20573211000001104  | Atorvastatin calcium trihydrate | Atorvastatin 40mg tablets (Wockhardt UK Ltd)                       |
| 52168 | 20496611000001108  | Atorvastatin calcium trihydrate | Atorvastatin 20mg tablets (Aspire Pharma Ltd)                      |

|       |                   |                                 |                                                                    |
|-------|-------------------|---------------------------------|--------------------------------------------------------------------|
| 52211 | 20482911000001102 | Atorvastatin calcium trihydrate | Atorvastatin 20mg tablets (Actavis UK Ltd)                         |
| 52397 | 20982611000001106 | Atorvastatin calcium trihydrate | Atorvastatin 40mg tablets (Dr Reddy's Laboratories (UK) Ltd)       |
| 52398 | 20492311000001102 | Atorvastatin calcium trihydrate | Atorvastatin 40mg tablets (A A H Pharmaceuticals Ltd)              |
| 52459 | 20483311000001108 | Atorvastatin calcium trihydrate | Atorvastatin 80mg tablets (Actavis UK Ltd)                         |
| 52460 | 20496911000001102 | Atorvastatin calcium trihydrate | Atorvastatin 40mg tablets (Aspire Pharma Ltd)                      |
| 52821 | 20982911000001100 | Atorvastatin calcium trihydrate | Atorvastatin 80mg tablets (Dr Reddy's Laboratories (UK) Ltd)       |
| 53594 | 16507511000001107 | Atorvastatin calcium trihydrate | Lipitor 80mg tablets (Mawdsley-Brooks & Company Ltd)               |
| 53772 | 20508511000001100 | Atorvastatin calcium trihydrate | Atorvastatin 80mg tablets (Alliance Healthcare (Distribution) Ltd) |
| 53887 | 20483111000001106 | Atorvastatin calcium trihydrate | Atorvastatin 40mg tablets (Actavis UK Ltd)                         |
| 53890 | 20979511000001106 | Atorvastatin calcium trihydrate | Atorvastatin 80mg tablets (Pfizer Ltd)                             |
| 54535 | 20977811000001101 | Atorvastatin calcium trihydrate | Atorvastatin 10mg tablets (Pfizer Ltd)                             |
| 54992 | 14158711000001109 | Atorvastatin calcium trihydrate | Atorvastatin 10mg/ 5ml oral suspension                             |
| 55032 | 20448211000001101 | Atorvastatin calcium trihydrate | Atorvastatin 10mg tablets (Dexcel-Pharma Ltd)                      |
| 55034 | 14158911000001106 | Atorvastatin calcium trihydrate | Atorvastatin 40mg/ 5ml oral suspension                             |
| 55444 | 20577411000001107 | Atorvastatin calcium trihydrate | Atorvastatin 40mg tablets (Zentiva)                                |
| 55727 | 20482711000001104 | Atorvastatin calcium trihydrate | Atorvastatin 10mg tablets (Actavis UK Ltd)                         |
| 56016 | 19719611000001109 | Atorvastatin calcium trihydrate | Lipitor 20mg chewable tablets (Pfizer Ltd)                         |
| 56097 | 19722411000001106 | Atorvastatin calcium trihydrate | Atorvastatin 10mg chewable tablets sugar free                      |
| 56165 | 19722511000001105 | Atorvastatin calcium trihydrate | Atorvastatin 20mg chewable tablets sugar free                      |
| 56182 | 20577611000001105 | Atorvastatin calcium trihydrate | Atorvastatin 80mg tablets (Zentiva)                                |
| 56248 | 14198211000001106 | Atorvastatin calcium trihydrate | Atorvastatin 20mg tablets (Sigma Pharmaceuticals Plc)              |
| 56564 | 22047511000001102 | Atorvastatin calcium trihydrate | Atorvastatin 20mg tablets (Almus Pharmaceuticals Ltd)              |
| 56841 | 20448611000001104 | Atorvastatin calcium trihydrate | Atorvastatin 40mg tablets (Dexcel-Pharma Ltd)                      |
| 57117 | 21779811000001108 | Atorvastatin calcium trihydrate | Atorvastatin 80mg tablets (Waymade Healthcare Plc)                 |
| 57348 | 20529411000001104 | Atorvastatin calcium trihydrate | Atorvastatin 10mg tablets (Consilient Health Ltd)                  |
| 57834 | 22613211000001109 | Atorvastatin calcium trihydrate | Atorvastatin 40mg tablets (DE Pharmaceuticals)                     |
| 57836 | 20495411000001101 | Atorvastatin calcium trihydrate | Atorvastatin 80mg tablets (Teva UK Ltd)                            |
| 58041 | 20494411000001102 | Atorvastatin calcium trihydrate | Atorvastatin 20mg tablets (Teva UK Ltd)                            |
| 58110 | 20577211000001108 | Atorvastatin calcium trihydrate | Atorvastatin 20mg tablets (Zentiva)                                |
| 58394 | 20508111000001109 | Atorvastatin calcium trihydrate | Atorvastatin 20mg tablets (Alliance Healthcare (Distribution) Ltd) |
| 58418 | 20492611000001107 | Atorvastatin calcium trihydrate | Atorvastatin 80mg tablets (A A H Pharmaceuticals Ltd)              |
| 58742 | 20570911000001100 | Atorvastatin calcium trihydrate | Atorvastatin 80mg tablets (Arrow Generics Ltd)                     |
| 58834 | 13831111000001108 | Atorvastatin calcium trihydrate | Atorvastatin 10mg tablets (DE Pharmaceuticals)                     |
| 58868 | 14197911000001103 | Atorvastatin calcium trihydrate | Atorvastatin 10mg tablets (Sigma Pharmaceuticals Plc)              |
| 59272 | 21779411000001106 | Atorvastatin calcium trihydrate | Atorvastatin 20mg tablets (Waymade Healthcare Plc)                 |
| 59331 | 13922611000001102 | Atorvastatin calcium trihydrate | Lipitor 10mg tablets (DE Pharmaceuticals)                          |
| 59357 | 22940511000001105 | Atorvastatin calcium trihydrate | Atorvastatin 10mg tablets (Ranbaxy (UK) Ltd)                       |
| 59446 | 22047711000001107 | Atorvastatin calcium trihydrate | Atorvastatin 40mg tablets (Almus Pharmaceuticals Ltd)              |
| 59776 | 20497611000001105 | Atorvastatin calcium trihydrate | Atorvastatin 80mg tablets (Aspire Pharma Ltd)                      |
| 59859 | 20492811000001106 | Atorvastatin calcium trihydrate | Atorvastatin 10mg tablets (Teva UK Ltd)                            |
| 60464 | 14018311000001109 | Atorvastatin calcium trihydrate | Atorvastatin 20mg/ 5ml oral suspension                             |
| 60511 | 22941211000001101 | Atorvastatin calcium trihydrate | Atorvastatin 40mg tablets (Ranbaxy (UK) Ltd)                       |
| 60607 | 22613511000001107 | Atorvastatin calcium trihydrate | Atorvastatin 80mg tablets (DE Pharmaceuticals)                     |

|       |                   |                                 |                                                                    |
|-------|-------------------|---------------------------------|--------------------------------------------------------------------|
| 60989 | 22202511000001100 | Atorvastatin calcium trihydrate | Atorvastatin 80mg tablets (Phoenix Healthcare Distribution Ltd)    |
| 61149 | 21779211000001107 | Atorvastatin calcium trihydrate | Atorvastatin 10mg tablets (Waymade Healthcare Plc)                 |
| 62219 | 22613011000001104 | Atorvastatin calcium trihydrate | Atorvastatin 20mg tablets (DE Pharmaceuticals)                     |
| 62429 | 13831511000001104 | Atorvastatin calcium trihydrate | Atorvastatin 20mg tablets (DE Pharmaceuticals)                     |
| 62476 | 22047911000001109 | Atorvastatin calcium trihydrate | Atorvastatin 80mg tablets (Almus Pharmaceuticals Ltd)              |
| 63140 | 20507911000001106 | Atorvastatin calcium trihydrate | Atorvastatin 10mg tablets (Alliance Healthcare (Distribution) Ltd) |
| 63249 | 20513411000001108 | Atorvastatin calcium trihydrate | Atorvastatin 80mg tablets (Consilient Health Ltd)                  |
| 63469 | 20512911000001107 | Atorvastatin calcium trihydrate | Atorvastatin 30mg tablets (Consilient Health Ltd)                  |
| 64067 | 14018211000001101 | Atorvastatin calcium trihydrate | Atorvastatin 20mg/ 5ml oral solution                               |
| 64702 | 21099211000001101 | Atorvastatin calcium trihydrate | Atorvastatin 30mg tablets (A A H Pharmaceuticals Ltd)              |
| 64810 | 22202111000001109 | Atorvastatin calcium trihydrate | Atorvastatin 40mg tablets (Phoenix Healthcare Distribution Ltd)    |
| 64825 | 22201511000001108 | Atorvastatin calcium trihydrate | Atorvastatin 10mg tablets (Phoenix Healthcare Distribution Ltd)    |
| 64868 | 29772511000001108 | Atorvastatin calcium trihydrate | Atorvastatin 40mg tablets (Sigma Pharmaceuticals Plc)              |
| 65193 | 22940911000001103 | Atorvastatin calcium trihydrate | Atorvastatin 20mg tablets (Ranbaxy (UK) Ltd)                       |
| 66963 | 29772911000001101 | Atorvastatin calcium trihydrate | Atorvastatin 80mg tablets (Sigma Pharmaceuticals Plc)              |
| 67402 | 32395011000001108 | Atorvastatin calcium trihydrate | Atorvastatin 40mg tablets (Kent Pharmaceuticals Ltd)               |
| 67573 | 22612811000001102 | Atorvastatin calcium trihydrate | Atorvastatin 10mg tablets (DE Pharmaceuticals)                     |
| 67660 | 22941511000001103 | Atorvastatin calcium trihydrate | Atorvastatin 80mg tablets (Ranbaxy (UK) Ltd)                       |
| 67846 | 22047311000001108 | Atorvastatin calcium trihydrate | Atorvastatin 10mg tablets (Almus Pharmaceuticals Ltd)              |
| 68023 | 20496111000001100 | Atorvastatin calcium trihydrate | Atorvastatin 10mg tablets (Aspire Pharma Ltd)                      |
| 68048 | 22201711000001103 | Atorvastatin calcium trihydrate | Atorvastatin 20mg tablets (Phoenix Healthcare Distribution Ltd)    |
| 68467 | 32394811000001103 | Atorvastatin calcium trihydrate | Atorvastatin 20mg tablets (Kent Pharmaceuticals Ltd)               |
| 68785 | 33556411000001105 | Atorvastatin calcium trihydrate | Atorvastatin 10mg tablets (Mylan)                                  |
| 68827 | 33556611000001108 | Atorvastatin calcium trihydrate | Atorvastatin 20mg tablets (Mylan)                                  |
| 69093 | 20573911000001108 | Atorvastatin calcium trihydrate | Atorvastatin 80mg tablets (Wockhardt UK Ltd)                       |
| 69427 | 33556811000001107 | Atorvastatin calcium trihydrate | Atorvastatin 40mg tablets (Mylan)                                  |
| 70693 | 29771911000001107 | Atorvastatin calcium trihydrate | Atorvastatin 10mg tablets (Sigma Pharmaceuticals Plc)              |
| 70987 | 20982011000001104 | Atorvastatin calcium trihydrate | Atorvastatin 10mg tablets (Dr Reddy's Laboratories (UK) Ltd)       |
| 71017 | 20982411000001108 | Atorvastatin calcium trihydrate | Atorvastatin 20mg tablets (Dr Reddy's Laboratories (UK) Ltd)       |
| 72164 | 34961811000001104 | Atorvastatin calcium trihydrate | Atorvastatin 20mg tablets (Bristol Laboratories Ltd)               |
| 72213 | 20572711000001103 | Atorvastatin calcium trihydrate | Atorvastatin 20mg tablets (Wockhardt UK Ltd)                       |
| 72641 | 14158811000001101 | Atorvastatin calcium trihydrate | Atorvastatin 40mg/ 5ml oral solution                               |
| 73520 | 13923011000001100 | Atorvastatin calcium trihydrate | Lipitor 20mg tablets (DE Pharmaceuticals)                          |
| 74518 | 20572511000001108 | Atorvastatin calcium trihydrate | Atorvastatin 10mg tablets (Wockhardt UK Ltd)                       |
| 75391 | 34682311000001101 | Atorvastatin calcium trihydrate | Atorvastatin 80mg/ 5ml oral suspension                             |
| 75622 |                   | Atorvastatin calcium trihydrate | Atorvastatin 60mg tablets (A A H Pharmaceuticals Ltd)              |
| 77344 |                   | Atorvastatin calcium trihydrate | Atorvastatin 80mg tablets (Mylan)                                  |
| 77427 |                   | Atorvastatin calcium trihydrate | Lipitor 10mg tablets (Waymade Healthcare Plc)                      |
| 77434 |                   | Atorvastatin calcium trihydrate | Lipitor 20mg tablets (Waymade Healthcare Plc)                      |
| 77782 |                   | Atorvastatin calcium trihydrate | Atorvastatin 40mg tablets (Bristol Laboratories Ltd)               |
| 24509 |                   |                                 | SIMVASTATIN                                                        |
| 29438 |                   |                                 | SIMVASTATIN                                                        |
